# Supplementary material
Source: PubMed Central journal article supplement (PMC6369783)

## Supplemental Material

### **More than 18,000 effectors in the *Legionella* genus genome provide multiple, independent combinations for replication in human cells**

Laura Gomez-Valero<sup>1,2</sup>, Christophe Rusniok<sup>1,2</sup>, Danielle Carson<sup>3</sup>, Sonia Mondino<sup>1,2</sup>, Ana Elena Pérez-Cobas<sup>1,2</sup>, Monica Rolando<sup>1,2</sup>, Shivani Pasricha<sup>4</sup>, Sandra Reuter<sup>5+</sup>, Jasmin Demirtas<sup>1,2</sup>, Johannes Crumbach<sup>1,2</sup>, Stephane Descorps-Declere<sup>6</sup>, Elizabeth L. Hartland<sup>4,7,8</sup>, Sophie Jarraud<sup>9</sup>, Gordon Dougan<sup>5</sup>, Gunnar N. Schroeder<sup>3,10</sup>, Gad Frankel<sup>3</sup>, and Carmen Buchrieser<sup>1,2,\*</sup>

**Table S1:** *Legionella* strains analyzed in the present study

**Table S2:** Type IV secretion systems predicted in the genomes analyzed

**Table S3:** Eukaryotic like domains identified in the *Legionella* proteins analyzed

**Table S4:** Small GTPases domains detected in the genus *Legionella* as defined in the CDD ncbi domain database

**Table S5:** Eukaryotic like proteins detected in the *Legionella* genomes analyzed in this study

**Table S6:** Aminoacid identity of the Dot/Icm components in *Legionella* species with respect to orthologous proteins in *L. pneumophila* Paris

**Table S7:** Distribution of seventeen highly conserved Dot/Icm secreted substrates

**Table S8:** Comparison of the effector repertoire among strains of the same *Legionella* species

**Table S9:** Number of Dot/Icm secreted proteins predicted in each strain analyzed

**Table S10:** Replication capacity of the different *Legionella* species analyzed in this study and collection of literature data on *Legionella* replication

**Table S11: Orthologous table for all genes of the 80 analyzed strains based on PanOCT.** The orthologous were defined with the program PanOCT using the parameters previously indicated in material and methods.)

**Figure S1:** Distribution of the genes predicted to encode for the biosynthesis of flagella among all *Legionella* species.

**Figure S2:** Phylogenetic analyses of the ergosterol, allinase and caleosin domain in *Legionella* suggest eukaryotic origin.

**Figure S3:** Presence/absence of proteins with small GTPase domains in the 80 *Legionella* strains analyzed in this study

**Figure S4:** Alignment of Ras and Rab proteins of *Legionella* showing that the structural features of these eukaryotic domains are conserved.

**Figure S5:** Phylogenetic tree of selected small GTPases from different *Legionella* spp.

**Figure S6:** Phylogenetic tree of sixteen Rab domain containing proteins identified in the genus *Legionella*.

**Figure S7:** Phylogenetic analyses of the eukaryotic like protein LanA0735.

**Figure S8:** Ratio of gain vs loss events per branch for each of the 25 selected types of eukaryotic domains.

**Figure S9:** The type IVB Dot/Icm secretion system is highly conserved whereas the Dot/Icm effectors are very diverse

**Figure S10:** FIR proteins and their predicted functional homologous in the 80 *Legionella* strains analyzed.

**Figure S11:** Sequence alignment for the regions of FIR proteins that are predicted to interact with IcmQ.

**Figure S12:** The replication capacity of the different *Legionella* species in THP-1 cells at 24h and 48h.

**Figure S13:** Intracellular replication of 40 different *Legionella* species in THP-1 derived macrophages.

**Figure S14:** The capacity to replicate in human cells seems to have been acquired independently several times during the evolution.

## Supplementary Material and Methods

**Sequencing and assembly:** Strains are listed in **Supplementary Table S1**. For strains sequenced in this study, DNA was extracted (Total DNA Extraction Kit, Sigma) and the *mip* gene was amplified and sequenced as described previously (1) to confirm species identification. *L. nagasakiensis*, *L. santacrucis* and *L. pneumophila* subspecies *fraserii*, were sequenced on an Illumina MiSeq. *L. bozemanii* 94163278 and *L. gormanii* 03/69 were sequenced on the Roche 454 GS-FLX platform with Titanium chemistry (paired-end reads, average insert size 8.9 kb). The reads, (average length of 215 bp), were assembled using Newbler 2.5.3 (Roche/454) into contigs with an average 26x read coverage. The remaining genomes were paired-end sequenced with the Illumina HiSeq (100 bases) and assembled using Velvet followed by an improvement pipeline (ref: PMID 28348874).

**Sequence processing and annotation:** The total size and GC content was calculated using “infoseq” (EMBOSS package(2)). For completely sequenced genomes, plasmids were included in the calculation to avoid bias for those strains where plasmids were not defined. Genes were predicted using AMIGENE (<http://www.genoscope.cns.fr/agc/tools/amigene/Form/form.php>). For published genomes the published annotation was used. For functional annotation RAST (3) was used.

**Pan/Core genome, orthologs and singletons:** Orthologous gene reconstruction was done with PanOCT: amino acid percentage identity cutoff 30%, BLAST e-value cutoff  $10^{-5}$ , and minimum percentage match length of subject and query 65% (**Supplementary Table S11**). An additional orthologous table with the same parameters incorporated two outgroups: *Coxiella burnettii* and *Rickettsiella grylli*. For comparisons we calculated orthologs groups also with OrthoMCL (4). In-house scripts were developed for calculating the pan-genome, core genome, unique genes and for the gene accumulation curve.

**Phylogenetic reconstruction and evolutionary analysis:** Phylogenetic reconstruction was carried out using all *Legionella* species analyzed but with two outgroup species (*C. burnettii*, *R. grylli*) or without. Only genes belonging to the core genome with a minimum identity cut off of 50% were selected. Based on this criterion we obtained 707 genes (without outgroups) or 326 genes (with outgroups). The corresponding amino acid sequences were aligned using MUSCLE(5) yielding alignments of 277,694 and 132,336 amino acids, respectively.

Ambiguous regions were removed applying Gblocks (6) with less stringent conditions. The resulting alignments of 232,973 and 113,005 aa, respectively were used to reconstruct phylogenetic trees using RaXML with the model RaxML (PROTGAMMAWAG) (7). Statistical support for the nodes was obtained after 100 bootstrap replicates.

Evolutionary analysis of presence/absence of proteins containing eukaryotic motifs was performed using GLOOME (8) and stochastic mapping. We used a Mixture model that allows both gain and loss probabilities to be different and also a gain/loss ratio that can vary among sites. We chose 4 as the number of rate category, very high optimization level and allowed root frequencies to differ from stationary ones. The probability cutoff for accepting gain/loss events as valid was at least 0.5. For comparisons GLOOME using parsimony with default parameters (same penalty for gain and gene loss) was run.

Protein motifs were detected using the Pfam database (version 30.0) implemented in the Interpro database (version 5.20-59.0)(9). For small GTPase-like proteins detected with Pfam, a second run using NCBI domains to detect specific Rab or Ras or Rho hits was undertaken. Proteins similar to eukaryotic proteins were detected as follows: one *Legionella* protein from each orthologous group from the PanOCT output was selected as representative, which was blasted against the Uniprot eukaryote database. Only proteins blasting against eukaryotes with an e-value  $10^{-4}$  or smaller, a minimum identity of 30% and coverage of at least 65% of the query protein were retained. These 6,809 proteins retained were then blasted against the Uniprot databases containing eukaryotes and prokaryotes. Results were filtered by e-value, coverage and identity as previously described with hits against bacterial genera often associated with amoeba not being taken into account: *Legionella*, *Fluoribacter*, *Tatlockia*, *Coxiella*, *Rickettsia*, *Chlamydia*, *Parachlamydia*, *Protochlamydia*, *Amoebophilus*, *Mycobacterium*, *Simkania*, *Waddlia* and *Piscichlamydia*. The *Legionella* proteins with the top hits against eukaryotic organisms or 90% of eukaryotic sequences among the first 25 hits were selected as putative eukaryotic-like proteins.

**Phylogenetic analyses of Rab and eukaryotic-like proteins:** For each orthologous group, one representative was used for Psiblast (NCBI non-redundant database, up to 500 hits). All significant blast results were recovered. For eukaryotic-like proteins, selected proteins were taken as query for Blastp (NCBI non-redundant database, up to 500 hits). Additionally, significant hits were searched by Blastp against only bacteria, amoeba, eukaryotes and archaea. A possible redundancy was reduced using skipredundant (emboss package) and sequences of equal or higher than 90% identity were removed. The obtained proteins were aligned using

MUSCLE(5) and evaluated and cleaned with t-coffee (10). From resulting alignments phylogenetic trees were constructed using FastTree (11) and local support was calculated with the Shimodaira-Hasegawa test. Final editing was carried out with iTOL webtool (12).

**Infection assays:** THP-1 cell infections were carried out as described previously (13) at an MOI of 10. After 1h of incubation cells were treated with  $100\mu\text{g ml}^{-1}$  gentamycin for 1h and washed with phosphate-buffered saline (PBS, Invitrogen) before incubation with serum-free medium. At 24, 48 and 72h THP-1 cells were lysed with PBS-0.1% TritonX-100. Replication was determined by counting colony-forming units (Cfu) on BCYE agar. Infections were carried out in duplicate or triplicate.

**Statistical analysis:** To define “replicating” and “non-replicating” species the CFUs obtained for each strain were compared to the *L. pneumophila* Paris reference strain at 24, 48 and 72h. Wilcoxon signed-rank test implemented in the R software was used for statistical significance.

**Translocation assays:** Selected genes were PCR-amplified, cloned in frame with the beta-lactamase (*blaM*) at the KpnI-XbaI sites of the plasmid pXDC61 (14). The resulting plasmids were electroporated into *L. pneumophila* or *L. longbeachae* strains. THP-1 cells were seeded in 96- well plates at  $10^5$  cells/well, quadruplicates per condition, and differentiated into adherent macrophage-like cells with 50 ng/ml PMA were infected with stationary-phase *L. pneumophila* and *L. longbeachae* carrying the different *blaM* fusions at MOI of 50 and centrifuged to synchronize the infection. 1h30 after infection cell monolayers were incubated with CCF4-AM (Life Technologies) and 0.1 M Probenecid, at room temperature for another 1h30. For flow cytometry measurements cells were washed with PBS and treated with Cell dissociation solution non-enzymatic (Sigma) for 30min at  $37^\circ\text{C}$  before FACS analysis. Flow cytometry of a minimum of  $10^5$  events per sample was performed using a MACSQuant VYB system (Miltenyi Biotec), with excitation at 405 nm (violet) and emission collection with 525/50 (Green) and 450/50 (Blue) filters. Data were analyzed with FlowJo software (LLC). First, to eliminate cell debris, all events were gated using forward scatter (FSC) and side scatter (SSC). FACS gates for green and blue fluorescence were set using the analyzed data from uninfected cells without any treatment or loaded with CCF4-AM. For each strain, quadruplicate samples were analyzed in three independent experiments. For microplate reader translocation assays, Raw264.7 cells were infected for 1h with *L. pneumophila* wild type (*Lp*)

or  $\Delta dotA$  (*Lp* $\Delta dotA$ ) expressing BlaM-effector fusions before adding the BlaM substrate CCF2-AM and translocation determined by measuring fluorescence emission of cleaved CCF2-AM (450 nm) product and substrate (520nm) using an excitation wavelength of 410 nm on a Fluostar Optima microplate reader. BlaM-LtpB was included as positive control and a BlaM-fusion of the *L. pneumophila* housekeeping gene *fabI* as background control.

## Supplementary Figure Legends

**Figure S1: Distribution of the genes predicted to encode for the biosynthesis of flagella among all *Legionella* species.** The different *Legionella* species are represented in columns, the genes encoding for the flagella machinery are represented in rows. Blue squares, orthologous gene is present; yellow squares, orthologous gene is absent.

**Figure S2: Phylogenetic analyses of the ergosterol, allinase and caleosin domain in *Legionella* suggest eukaryotic origin.** Unrooted tree of *Legionella* A) ergosterol, B) allinase and C) caleosin domain proteins and their homologous recruited by Blastp constructed using likelihood. Local support values are represented on the corresponding branches (only local support of at least 0.7 are shown).

**Figure S3: Presence/absence of proteins with small GTPase domains in the 80 *Legionella* strains analyzed in this study.** Proteins in the same column are considered to be orthologous. On the top of the column the label of one selected protein belonging to the corresponding orthologous group is indicated. The colour of the square indicates the type of GTPases: blue (Rab domain), orange (Ras domain), pink (Rho domain), green (small GTPases without another specific domain). White squares represent absence of orthologous protein in the corresponding strain. F, F-box domain; U, U-box domain; A, Ankyrin motif.

**Figure S4: Alignment of Ras and Rab proteins of *Legionella* showing that the structural features of these eukaryotic domains are conserved.** Representatives of the different orthologous groups of *Legionella* Ras and Rab proteins were selected to represent the aminoacid sequence of the RabGTPase subfamily based on its HMM profile (Stenmarck and Olkkonen et al. 2001). RabF, Rab-specific residues; RabSF, subfamily-specific motifs; G, guanine-base-binding-motif; PM, phosphate/magnesium-binding motif.

**Figure S5: Phylogenetic tree of selected small GTPases from different *Legionella* spp.** The same color indicates proteins belonging to the same orthologous group. Proteins with an asterisk are the ones that have been selected for translocation assays.

**Figure S6: Phylogenetic tree of sixteen Rab domain containing proteins identified in the genus *Legionella*.** Homologues of the different Rab proteins of *Legionella* were recruited by blastp and used for phylogenetic reconstruction using likelihood (FastTree). Local support values are represented with numbers on the corresponding branches. The root of the tree was randomly chosen. The following proteins were used to recruit homologues: A) *L. birminghamensis* protein Lbir2252; B) *L. gormanii* protein LgoA0634; C) *L. geestiana* protein Lges1860; D) *L. longbeachae* protein Llo2329; E) *L. maceachernii* protein Lma1540; F) *L. gratiana* protein Lgra3435; G) *L. massiliensis* protein LmasA1512; H) *L. massiliensis* protein LmasA3690; I) *L. quateirensis* protein Lqua0234; J) *L. quinlivanii* protein Lquin3026; K) *L. spiritensis* protein Lspi0161; L) *L. steigerwaltii* protein Lstei0814; M) *L. steigerwaltii* protein Lstei2185; N) *L. wadsworthii* protein Lwad3214; O) *L. waltersii* protein Lwal3261; P) *L. adelaidensis* protein Lade0491.

**Figure S7: Phylogenetic analyses of the eukaryotic like protein LanA0735.** Unrooted tree of LanA0735 and its homologues recruited by blastp constructed using likelihood. Local support values are represented on the corresponding branches (only local support of at least 0.7 are shown).

**Figure S8: Ratio of gain vs loss events per branch for each of the 25 selected types of eukaryotic domains.** In blue events that took place in internal branches and in red events that took place in terminal branches of the tree.

**Figure S9: The type IVB Dot/Icm secretion system is highly conserved whereas the Dot/Icm effectors are very diverse.** **A)** Dot/Icm secretion complex (modified from (15)). Proteins have been colored according to the percentage of the average amino acid identity among the corresponding orthologous for each Dot/Icm component in the different strains analyzed (red for the most conserved ones to clear yellow for the less conserved ones). Green, IcmR as many *Legionella* species encode proteins with low or no-homology to IcmR from *L. pneumophila*. **B)** Conservation of validated Dot/Icm substrates of *L. pneumophila* strain Philadelphia in the different strains/species analyzed in this study. Blue, an orthologous substrate is present in the corresponding genome; yellow an orthologous protein is absent in the corresponding strain. Red square indicates the different *L. pneumophila* strains where the degree of conservation of the substrates is higher. Red arrows point to substrates that are present in all analyzed strains and that thus constitute the core effectors. **C)** Venn diagram showing the number of members of the different effector groups (ELP; eukaryotic-like protein; EM, protein with eukaryotic domains) and the number of orthologous proteins identified within all genomes sequenced. \*Effectors predicted by the machine learning approach applied by Burstein and colleagues 2016. The summary of the different orthologous proteins adds up to over 18 000 predicted substrates **D)** Growth accumulation curve representing how the total repertoire of predicted effectors in the genus *Legionella* increases each time new genomes are sequenced.

**Figure S10: FIR proteins and their predicted functional homologous in the 80 *Legionella* strains analyzed.** Shared colour, shared homology due to either orthology or paralogy (based on OrthoMCL results, Table S9); white colour, absence of homologous gene.

**Figure S11: Sequence alignment for the regions of FIR proteins that are predicted to interact with IcmQ.** Predicted  $\alpha$  helices based on JPred4 are indicated as yellow bars. The most hydrophobic residues according to this table are colored red and the most hydrophilic ones are colored blue.

**Figure S12: The replication capacity of the different *Legionella* species in THP-1 cells at 24h and 48h.** Replication of each strain at the time points 24h and 48h after infection of THP-1 cells is shown. Intracellular replication was determined by recording the number of colony-forming units (CFU) after plating on BCYE agar. *L. pneumophila* Paris was taken as representative of a replicating strain (blue box) and the *L. pneumophila* mutant  $\Delta dotA$  was taken as a representative of non-replicating *Legionella* (red box). **A)** *Legionella* species replicating like or significantly better than *L. pneumophila* Paris at 24h. **B)** Species with no or significantly lower replication capacities than *L. pneumophila* Paris at 24h. **C)** *Legionella* species replicating like or significantly better than *L. pneumophila* Paris at 48h. **D)** Species with no or significantly lower replication capacities than *L. pneumophila* Paris at 48h.

**Figure S13. Intracellular replication of 40 different *Legionella* species in THP-1 derived macrophages.** *L. pneumophila* strain Paris wild type (wt) and its isogenic  $\Delta dotA$  mutant were used as positive and negative controls, respectively. Intracellular replication for each strain was determined by recording the number of colony-forming units (CFU) through plating on BCYE agar after 2, 24, 48 and 72 hours of infection. Results are expressed as Log10 ratio



CFU Tn/T0 and each point represents the mean  $\pm$  standard deviation of two or three independent experiments. The error bars represent the standard deviation.

**Figure S14: The capacity to replicate in human cells seems to have been acquired independently several times during the evolution.** On the left the phylogeny of the genus *Legionella* established in this study. The first column provides the description of the strains as isolated from clinical cases (Clin) or from the environment (Env) based on data from the literature. The second column provides information about the capacity of each strain to replicate in THP-1 cells based either on our experiments or on data from the literature.

**Supplementary Table S1: *Legionella* strains analyzed in the present study**

| Species                          | strain              | ATCC   | DSMZ  | CIP     | Isol | Genome sequence | Acc. Number     |
|----------------------------------|---------------------|--------|-------|---------|------|-----------------|-----------------|
| <i>L. adalaidensis</i>           | 1762-AUS-E          | 49625  | 19888 | 103645  | Env  | This study      |                 |
| <i>L. anisa</i>                  | WA-316-C3           | 35292  | 17627 | 103870  | Cli  | This study      | NZ_CANP01000001 |
| <i>L. anisa</i>                  | Linanissette        |        |       |         | Cli  | (17)            | /56             |
| <i>L. beliardensis</i>           | Wilkinson 1407-AL-H | 700512 | 19152 | 106632  | Env  | This study      |                 |
| <i>L. birminghamensis</i>        | 1407-AL-H           | 43702  | 19232 | 103871  | Cli  | This study      |                 |
| <i>L. bozemanii (bozemaniae)</i> | WIGA                | 33217  | 16523 | 103872  | Cli  | This study      |                 |
| <i>L. bozemanii (bozemaniae)</i> | 94163278            |        |       |         | ?    | This study      |                 |
| <i>L. brunensis</i>              | 441-1               | 43878  | 19236 | 103874  | Env  | This study      |                 |
| <i>L. busanensis</i>             | BAA518              |        |       | 108685  | Env  | This study      |                 |
| <i>L. cherrii</i>                | ORW                 | 35252  | 19213 | 103842  | Env  | This study      |                 |
| <i>L. cincinnatiensis</i>        | 72-OH-0             | 43753  | 19233 | 103875  | Cli  | This study      |                 |
| <i>L. drancourtii (LLAP12)</i>   | LLAP12              | 50991  |       |         | Env  | (18)            | NZ_ACUL02000000 |
| <i>L. drozanskii</i>             | LLAP1               | 700990 | 19890 | 107644  | Env  | This study      |                 |
| <i>L. dumoffii</i>               | NY23                | 33279  | 17625 | 103876  | Cli  | (19)            | AGVU00000000    |
| <i>L. dumoffii</i>               | TexKL               | 33343  |       |         | Cli  | (19)            |                 |
| <i>L. erythra</i>                | SE-32A-C8           | 35303  | 17644 | 103843  | Env  | This study      |                 |
| <i>L. fairfieldensis</i>         | 1725-Aus-E          | 49588  |       | 105266  | Env  | This study      |                 |
| <i>L. fallonii</i>               | LLAP10              | 700992 | 19889 | 107645  | Env  | (20)            | PRJEB7322       |
| <i>L. feeleii</i>                | WO-44C              | 35072  | 17645 | 103877  | Cli  | This study      |                 |
| <i>L. geestiana</i>              | 1308                | 49504  |       | 105569  | Env  | This study      |                 |
| <i>L. genomospecies</i>          | 2055-AUS-E          | 51913  |       | 106678  | Env  | This study      |                 |
| <i>L. gormanii</i>               | LS-13               | 33297  | 16241 | 104724  | Cli  | This study      |                 |
| <i>L. gormanii</i>               | 23801               |        |       |         | ?    | This study      |                 |
| <i>L. gratiana</i>               | Lyon 8420412        | 49413  |       | 105267  | Env  | This study      |                 |
| <i>L. gresilensis</i>            | Greoux 11D13        | 700509 |       | 106631  | Env  | This study      |                 |
| <i>L. hackeliae</i>              | Lansing 2           | 35250  | 19214 | 103844  | Cli  | (20)            | PRJEB7321       |
| <i>L. impletisoli</i>            | OA1-1               |        | 18493 |         | Env  | This study      |                 |
| <i>L. israelensis</i>            | Bercovier 4         | 43119  | 19235 | 103879  | Env  | This study      |                 |
| <i>L. jamestowniensis</i>        | JA-26-G1-E2         | 35298  | 19215 | 103845  | Env  | This study      |                 |
| <i>L. jordanis</i>               | Gorman BL-540       | 33623  | 19212 | 105268  | Cli  | This study      |                 |
| <i>L. lansingensis</i>           | 1677-MI-H           | 49751  | 19556 | 103542  | Cli  | This study      |                 |
| <i>L. LIKE brunensis</i>         | W10-070             |        |       |         | ?    | This study      |                 |
| <i>L. londiniensis</i>           | 1477                | 49505  |       | 105269  | Env  | This study      |                 |
| <i>L. longbeachae</i>            | D-4968              |        |       |         | Cli  | (21)            | GCA_000176095.1 |
| <i>L. longbeachae</i>            | NSW150              |        |       |         | Cli  | (22)            | FN6501401       |
| <i>L. longbeachae</i>            | Long Beach 4        | 33462  |       | 103880T | Cli  | (22)            |                 |
| <i>L. longbeachae</i>            | 98072               |        |       |         | ?    | (22)            |                 |
| <i>L. maceachernii</i>           | Gorman PX-1-G2-E2   | 35300  | 16642 |         | Cli  | This study      |                 |
| <i>L. massiliensis</i>           |                     |        |       |         | Env  | GCA_0007        | GCA_000756695.1 |

|                                               |               |          |       |         |     |                |                 |
|-----------------------------------------------|---------------|----------|-------|---------|-----|----------------|-----------------|
|                                               |               |          |       |         |     | 56695.1        |                 |
|                                               |               |          |       |         |     | GCA_0007       |                 |
| <i>L. massiliensis</i>                        | LegA          | 24804    | 24804 |         | Env | 56815.1        | GCA_000756815.1 |
| <i>L. micdadei</i>                            | Tatlock       | 33218    | 16640 | 103882  | Cli | (20)           | PRJEB7312       |
| <i>L. micdadei</i>                            | 02/42         |          |       |         | Cli | (20)           | SRP047311       |
| <i>L. moravica</i>                            | 316-86        | 43877    | 19234 | 103883  | Env | This study     |                 |
| <i>L. nagasakiensis</i>                       | JCM 15315     | BAA-1557 |       |         | Cli | This study     |                 |
| <i>L. nautarum</i>                            | 1224          | 49506    |       | 105270  | Env | This study     |                 |
| <i>L. norrlandica</i>                         | LEGN          | BAA-2678 |       |         | Env | No publication |                 |
| <i>L. oakridgensis</i>                        | Oak Ridge 10  | 33761    |       | 103884  | Env | (23)           | NZ_CP004006/7   |
| <i>L. oakridgensis</i>                        | RV-2-2007     |          |       |         | Env | (23)           | GCA_000512715.1 |
| <i>L. osnabrueckensis</i>                     | W05-934-2     |          |       |         | ?   | This study     |                 |
| <i>L. parisiensis</i>                         | PF-209C-C2    | 35299    | 19216 | 103847  | Cli | This study     |                 |
| <i>L. pneumophila</i> subsp. <i>pascullei</i> | Brown U8W     | 33737    | 7515  | 105570  | Env | This study     |                 |
| <i>L. pneumophila</i>                         | Paris         |          |       | 107629  | Cli | (24)           | CR628336        |
| <i>L. pneumophila</i>                         | Lens          |          |       | 108286  | Cli | (24)           | C_006369        |
| <i>L. pneumophila</i>                         | Philadelphia  | 33152    | 7513  | 103854T | Cli | (25)           | NC_002942       |
| <i>L. pneumophila</i>                         | Corby         |          |       |         | Cli | (26)           | NC_009494       |
| <i>L. pneumophila</i>                         | Alcoy         |          |       |         | Cli | (27)           | CP001828        |
| <i>L. pneumophila</i>                         | 130b          |          |       |         | Cli | (28)           | FR687201        |
| <i>L. pneumophila</i>                         | Lorraine      |          |       | 108729  | Cli | (29)           | FQ958210/2      |
| <i>L. pneumophila</i>                         | HL06041035    |          |       |         | Env | (29)           | FQ958211        |
| <i>L. pneumophila</i>                         | 570-CO-H      |          |       |         | Cli | (30)           | CP003192        |
| <i>L. pneumophila</i>                         | LPE509        | -        | -     | -       | Env | (31)           | CP003885/6      |
| <i>L. pneumophila</i>                         | Thunder Bay   | -        | -     | -       | Cli | (32)           | CP003730        |
| <i>L. pneumophila</i> subsp. <i>fraseri</i>   | Los Angeles 1 | 33156    |       | 103858  | Cli | This study     |                 |
| <i>L. pneumophila</i> subsp. <i>fraseri</i>   | Dallas 1E     | 33216    |       | 103859  | Env | No publication | NZ_JFIK01000000 |
| <i>L. pneumophila</i> subsp. <i>fraseri</i>   | Lansing3      | 35251    |       |         | Cli | No publication | NZ_JFIG01000000 |
| <i>L. quateirensis</i>                        | Thacker 1335  | 49507    |       | 105271  | Env | This study     |                 |
| <i>L. quinlivanii</i>                         | 1442-AUS-E    | 43830    |       | 105272  | Env | This study     |                 |
| <i>L. rowbothamii</i>                         | LLAP6         | 700991   |       | 107646  | Env | This study     |                 |
| <i>L. rubrilucens</i>                         | WA-270A-C2    | 35304    | 11884 | 103848  | Env | This study     |                 |
| <i>L. sainthelensi</i>                        | MSH-4         | 35248    | 19231 | 103885  | Cli | This study     |                 |
| <i>L. santicrucis</i>                         | SC-63-C7      | 352301   | 19325 | 103849  | Env | This study     |                 |
| <i>L. shakespearei</i>                        | CDC 214       | 49655    | 23087 | 103541  | Env |                | NZ_AREN01000000 |
| <i>L. spiritensis</i>                         | Bibb HSH-9    | 35249    | 19324 | 103850  | Env | This study     |                 |
| <i>L. steigerwaltii</i>                       | SC-18-C9      | 35302    |       | 103851  | Env | This study     |                 |
| <i>L. taurinensis</i>                         | Turin I       | 700508   |       | 106300  | Env | This study     |                 |
| <i>L. tucsonensis</i>                         | 1087-AZ-H     | 49180    | 19246 | 105113  | Cli | This study     |                 |
| <i>L. wadsworthii</i>                         | 81-716        | 33877    |       | 103886  | Cli | This study     |                 |
| <i>L. waltersii</i>                           | 2074-AUS-E    | 51914    |       | 104965  | Env | This study     |                 |
| <i>L. worsleiensis</i>                        | 95/83-1347    | 49508    |       | 105114  | Env | This study     |                 |
| <i>L. yabuuchiae</i>                          | OA1-2         |          | 18492 | --      | Env | This study     |                 |

**Supplementary Table S2: Type IV secretion systems\* predicted in the genomes analyzed**

| Species                           | strain              | T4SS <sup>&amp;</sup><br>typeF | T4SS <sup>&amp;</sup><br>typeG | T4SS <sup>&amp;</sup><br>typeI | T4SS <sup>&amp;</sup><br>typeT |
|-----------------------------------|---------------------|--------------------------------|--------------------------------|--------------------------------|--------------------------------|
| <i>L. adalaidensis</i>            | 1762-AUS-E          | 0                              | 1                              | 1                              | 0                              |
| <i>L. londiniensis</i>            | 1477                | 0                              | 1                              | 1                              | 0                              |
| <i>L. yabuuchiae</i>              | OA1-2               | 0                              | 1                              | 1                              | 0                              |
| <i>L. impletisoli</i>             | OA1-1               | 1                              | 0                              | 1                              | 1                              |
| <i>L. oakridgensis</i>            | RV2-2007            | 2                              | 1                              | 1                              | 1                              |
| <i>L. oakridgensis</i>            | Oak Ridge 10        | 1                              | 0                              | 1                              | 0                              |
| <i>L. nagasakiensis</i>           | JCM 15315           | 0                              | 0                              | 0                              | 2                              |
| <i>L. LIKE brunensis</i>          | W10-070             | 0                              | 0                              | 1                              | 1                              |
| <i>L. jordanis</i>                | Gorman BL-540       | 0                              | 2                              | 1                              | 0                              |
| <i>L. lansingensis</i>            | 1677-MI-H           | 0                              | 0                              | 1                              | 0                              |
| <i>L. jamestowniensis</i>         | JA-26-G1-E2         | 1                              | 2                              | 0                              | 1                              |
| <i>L. hackeliae</i>               | Lansing 2           | 1                              | 1                              | 0                              | 0                              |
| <i>L. brunensis</i>               | 441-1               | 0                              | 1                              | 0                              | 0                              |
| <i>L. fairfieldensis</i>          | 1725-Aus-E          | 0                              | 2                              | 1                              | 0                              |
| <i>L. massiliensis</i>            |                     | 1                              | 1                              | 1                              | 0                              |
| <i>L. massilensis</i>             | LegA                | 1                              | 1                              | 1                              | 0                              |
| <i>L. drozanskii</i>              | LLAP1               | 1                              | 0                              | 1                              | 0                              |
| <i>L. nautarum</i>                | 1224                | 1                              | 0                              | 1                              | 1                              |
| <i>L. maceachernii</i>            | Gorman PX-1-G2-E2   | 1                              | 2                              | 1                              | 0                              |
| <i>L. micdadei</i>                | 02-42               | 0                              | 0                              | 1                              | 2                              |
| <i>L. micdadei</i>                | Tatlock             | 0                              | 1                              | 1                              | 1                              |
| <i>L. feeleii</i>                 | WO-44C              | 0                              | 1                              | 1                              | 0                              |
| <i>L. beliardensis</i>            | Wilkinson 1407-AL-H | 1                              | 2                              | 1                              | 0                              |
| <i>L. gresilensis</i>             | Greoux 11D13        | 2                              | 1                              | 1                              | 0                              |
| <i>L. busanensis</i>              | BAA518              | 2                              | 2                              | 1                              | 0                              |
| <i>L. genomospecies</i>           | 2055-AUS-E          | 0                              | 1                              | 1                              | 1                              |
| <i>L. quinlivanii</i>             | 1442-AUS-E          | 1                              | 0                              | 1                              | 1                              |
| <i>L. birminghamensis</i>         | 1407-AL-H           | 1                              | 1                              | 1                              | 1                              |
| <i>L. spiritensis</i>             | Bibb HSH-9          | 0                              | 0                              | 1                              | 2                              |
| <i>L. erythra</i>                 | SE-32A-C8           | 2                              | 1                              | 1                              | 1                              |
| <i>L. rubrilucens</i>             | WA-270A-C2          | 1                              | 2                              | 1                              | 1                              |
| <i>L. taurinensis</i>             | Turin I             | 0                              | 1                              | 1                              | 0                              |
| <i>L. israelensis</i>             | Bercovier 4         | 0                              | 1                              | 1                              | 1                              |
| <i>L. rowbothamii</i>             | LLAP6               | 0                              | 1                              | 1                              | 1                              |
| <i>L. drancourtii</i><br>(LLAP12) | LLAP12              | 0                              | 3                              | 1                              | 2                              |
| <i>L. gratiana</i>                | Lyon 8420412        | 1                              | 1                              | 1                              | 1                              |
| <i>L. sainthelensi</i>            | MSH-4               | 0                              | 1                              | 1                              | 0                              |
| <i>L. longbeachae</i>             | Long Beach 4        | 2                              | 1                              | 1                              | 0                              |
| <i>L. longbeachae</i>             | D-4968              | 1                              | 1                              | 1                              | 1                              |
| <i>L. longbeachae</i>             | NSW150              | 1                              | 0                              | 1                              | 1                              |
| <i>L. longbeachae</i>             | 98072               | 1                              | 0                              | 1                              | 0                              |
| <i>L. cincinnatiensis</i>         | 72-OH-0             | 2                              | 1                              | 1                              | 0                              |

|                                                  |               |   |   |   |   |
|--------------------------------------------------|---------------|---|---|---|---|
| <i>L. santicrucis</i>                            | SC-63-C7      | 3 | 3 | 1 | 1 |
| <i>L. dumoffii</i>                               | TexKL         | 2 | 1 | 1 | 1 |
| <i>L. dumoffii</i>                               | NY23          | 2 | 1 | 1 | 0 |
| <i>L. cherrii</i>                                | ORW           | 0 | 0 | 1 | 1 |
| <i>L. steigerwaltii</i>                          | SC-18-C9      | 2 | 0 | 1 | 0 |
| <i>L. wadsworthii</i>                            | 81-716        | 1 | 0 | 1 | 0 |
| <i>L. tucsonensis</i>                            | 1087-AZ-H     | 0 | 1 | 1 | 0 |
| <i>L. anisa</i>                                  | WA-316-C3     | 4 | 2 | 1 | 2 |
| <i>L. anisa</i>                                  | Linanisette   | 2 | 2 | 1 | 2 |
| <i>L. parisiensis</i>                            | PF-209C-C2    | 1 | 1 | 1 | 1 |
| <i>L. bozemanii</i><br>( <i>bozemaniae</i> )     | WIGA          | 1 | 0 | 1 | 0 |
| <i>L. bozemanii</i><br>( <i>bozemaniae</i> )     | 94163278      | 2 | 0 | 1 | 1 |
| <i>L. gormanii</i>                               | 03-69         | 2 | 1 | 1 | 1 |
| <i>L. gormanii</i>                               | LS-13         | 0 | 0 | 1 | 1 |
| <i>L. fallonii</i>                               | LLAP10        | 1 | 1 | 0 | 0 |
| <i>L. shakespearei</i>                           | CDC 214       | 0 | 0 | 1 | 0 |
| <i>L. worsleiensis</i>                           | 95/83-1347    | 1 | 0 | 1 | 0 |
| <i>L. quateirensis</i>                           | Thacker 1335  | 2 | 0 | 1 | 2 |
| <i>L. moravica</i>                               | 316-86        | 0 | 3 | 1 | 1 |
| <i>L. waltersii</i>                              | 2074-AUS-E    | 0 | 3 | 0 | 1 |
| <i>L. norrlandica</i>                            | LEGN          | 0 | 1 | 1 | 1 |
| <i>L. pneumophila</i>                            | Alcoy         | 0 | 1 | 0 | 2 |
| <i>L. pneumophila</i>                            | Corby         | 0 | 2 | 0 | 2 |
| <i>L. pneumophila</i>                            | Thunder Bay   | 1 | 2 | 0 | 0 |
| <i>L. pneumophila</i>                            | 570-CO-H      | 1 | 2 | 0 | 0 |
| <i>L. pneumophila</i>                            | LPE509        | 1 | 1 | 0 | 2 |
| <i>L. pneumophila</i>                            | Philadelphia  | 1 | 1 | 0 | 0 |
| <i>L. pneumophila</i>                            | 130b          | 0 | 2 | 0 | 1 |
| <i>L. pneumophila</i>                            | Lens          | 1 | 1 | 0 | 0 |
| <i>L. pneumophila</i>                            | Lorraine      | 1 | 1 | 0 | 1 |
| <i>L. pneumophila</i>                            | Paris         | 1 | 2 | 0 | 0 |
| <i>L. pneumophila</i>                            | HL06041035    | 0 | 2 | 0 | 0 |
| <i>L. pneumophila</i><br>subsp. <i>fraseri</i>   | Dallas 1E     | 1 | 1 | 0 | 0 |
| <i>L. pneumophila</i><br>subsp. <i>fraseri</i>   | Los Angeles 1 | 0 | 2 | 0 | 0 |
| <i>L. pneumophila</i><br>subsp. <i>fraseri</i>   | Lansing3      | 1 | 1 | 0 | 0 |
| <i>L. pneumophila</i><br>subsp. <i>pascaliei</i> | Brown U8W     | 0 | 1 | 0 | 1 |
| <i>L. geestiana</i>                              | 1308          | 0 | 1 | 0 | 2 |
| <i>L. osnabrueckensis</i>                        | W0511934-2    | 1 | 1 | 0 | 1 |

\* All T4SS except the Dot/Icm system

&The prediction was based on results by the program CONJscan-T4SSscan (<https://galaxy.pasteur.fr/forms::CONJscan-T4SSscan>)(16).

**Supplementary Table S3: Eukaryotic like domains identified in the *Legionella* proteins analyzed**

| <b>Interpro number</b> | <b>%Eukaryotic *</b> | <b>Motif name</b>                                         | <b><i>Legionella</i> proteins**</b> |
|------------------------|----------------------|-----------------------------------------------------------|-------------------------------------|
| IPR020683              | 78.20                | Ankyrin repeat-containing domain                          | 1134                                |
| IPR000719              | 85.11                | Protein kinase domain                                     | 519                                 |
| IPR002110              | 78.68                | Ankyrin repeat                                            | 292                                 |
| IPR000883              | 94.63                | Cytochrome c oxidase, subunit I                           | 164                                 |
| IPR001806              | 90.93                | Small GTPase superfamily                                  | 157                                 |
| IPR001810              | 99.38                | F-box domain                                              | 155                                 |
| IPR016174              | 80.45                | Di-haem cytochrome, transmembrane                         | 124                                 |
| IPR001895              | 99.36                | Guanine-nucleotide dissociation stimulator CDC25          | 105                                 |
| IPR001128              | 75.16                | Cytochrome P450                                           | 105                                 |
| IPR000407              | 97.53                | Nucleoside phosphatase GDA1/CD39                          | 101                                 |
| IPR025789              | 84.04                | Histone methylation DOT1                                  | 92                                  |
| IPR001214              | 90.05                | SET domain                                                | 86                                  |
| IPR005798              | 97.00                | Cytochrome b/b6, C-terminal                               | 80                                  |
| IPR005797              | 96.79                | Cytochrome b/b6, N-terminal                               | 80                                  |
| IPR008380              | 94.55                | HAD-superfamily hydrolase, subfamily IG, 5'-nucleotidase  | 80                                  |
| IPR011759              | 77.56                | Cytochrome C oxidase subunit II, transmembrane domain     | 80                                  |
| IPR003734              | 76.18                | Protein of unknown function DUF155                        | 80                                  |
| IPR001611              | 82.86                | Leucine-rich repeat                                       | 79                                  |
| IPR015345              | 85.19                | Cytokinin dehydrogenase 1, FAD/cytokinin binding domain   | 74                                  |
| IPR020946              | 75.02                | Flavin monooxygenase-like                                 | 70                                  |
| IPR018108              | 99.85                | Mitochondrial substrate/solute carrier                    | 68                                  |
| IPR003613              | 99.39                | U box domain                                              | 63                                  |
| IPR001938              | 97.90                | Thaumatococcus                                            | 62                                  |
| IPR000408              | 75.61                | Regulator of chromosome condensation, RCC1                | 57                                  |
| IPR004344              | 99.33                | Tubulin-tyrosine ligase/Tubulin polyglutamylase           | 50                                  |
| IPR001171              | 98.09                | Ergosterol biosynthesis ERG4/ERG24                        | 42                                  |
| IPR001506              | 90.46                | Peptidase M12A, astacin                                   | 42                                  |
| IPR006603              | 79.94                | PQ-loop repeat                                            | 42                                  |
| IPR024518              | 94.34                | Domain of unknown function DUF3421                        | 41                                  |
| IPR008758              | 90.40                | Peptidase S28                                             | 40                                  |
| IPR000504              | 95.22                | RNA recognition motif domain                              | 39                                  |
| IPR004119              | 78.46                | Protein of unknown function DUF227                        | 39                                  |
| IPR002680              | 88.29                | Alternative oxidase                                       | 36                                  |
| IPR000219              | 99.72                | Dbl homology (DH) domain                                  | 33                                  |
| IPR000198              | 99.15                | Rho GTPase-activating protein domain                      | 29                                  |
| IPR001300              | 96.60                | Peptidase C2, calpain, catalytic domain                   | 29                                  |
| IPR002909              | 77.51                | IPT domain                                                | 28                                  |
| IPR001245              | 99.36                | Serine-threonine/tyrosine-protein kinase catalytic domain | 26                                  |

|           |        |                                                                               |    |
|-----------|--------|-------------------------------------------------------------------------------|----|
| IPR000904 | 98.92  | Sec7 domain                                                                   | 26 |
| IPR002553 | 99.95  | Clathrin/coatamer adaptor, adaptin-like, N-terminal                           | 25 |
| IPR002885 | 98.48  | Pentatricopeptide repeat                                                      | 25 |
| IPR025749 | 96.18  | Sphingomyelin synthase-like domain                                            | 22 |
| IPR000490 | 89.66  | Glycoside hydrolase, family 17                                                | 21 |
| IPR000980 | 99.76  | SH2 domain                                                                    | 20 |
| IPR000357 | 85.77  | HEAT                                                                          | 20 |
| IPR005492 | 98.89  | Leucine-rich glioma-inactivated , EPTP repeat                                 | 19 |
| IPR009772 | 97.24  | D123                                                                          | 19 |
| IPR022099 | 96.67  | Protein of unknown function DUF3638                                           | 19 |
| IPR003653 | 80.50  | Peptidase C48, SUMO/Sentrin/Ubl1                                              | 18 |
| IPR001388 | 99.13  | Synaptobrevin                                                                 | 17 |
| IPR001563 | 86.28  | Peptidase S10, serine carboxypeptidase                                        | 17 |
| IPR005200 | 83.64  | Glycoside hydrolase, family 81                                                | 15 |
| IPR008862 | 99.49  | T-complex 11                                                                  | 14 |
| IPR003323 | 97.54  | Ovarian tumour, otubain                                                       | 14 |
| IPR013684 | 91.21  | Mitochondrial Rho-like                                                        | 14 |
| IPR019012 | 93.82  | RNA cap guanine-N2 methyltransferase                                          | 12 |
| IPR000668 | 85.81  | Peptidase C1A, papain C-terminal                                              | 12 |
| IPR000863 | 76.04  | Sulfotransferase domain                                                       | 12 |
| IPR007736 | 99.46  | Caleosin                                                                      | 11 |
| IPR009852 | 96.78  | T-complex protein 10, C-terminal domain                                       | 11 |
| IPR027796 | 94.95  | OTT_1508-like deaminase                                                       | 11 |
| IPR000048 | 94.26  | IQ motif, EF-hand binding site                                                | 11 |
| IPR001548 | 80.86  | Peptidase M2, peptidyl-dipeptidase A                                          | 10 |
| IPR006948 | 100.00 | Allinase, C-terminal                                                          | 10 |
| IPR001199 | 95.67  | Cytochrome b5-like heme/steroid binding domain                                | 9  |
| IPR019400 | 93.17  | Peptidase C65, otubain                                                        | 9  |
| IPR000626 | 99.39  | Ubiquitin-like                                                                | 8  |
| IPR002128 | 96.48  | NADH:ubiquinone/plastoquinone oxidoreductase, chloroplast chain 5, C-terminal | 8  |
| IPR005821 | 85.92  | Ion transport domain                                                          | 8  |
| IPR006045 | 76.25  | Cupin 1                                                                       | 8  |
| IPR004886 | 99.84  | Glucanosyltransferase                                                         | 7  |
| IPR004827 | 99.16  | Basic-leucine zipper domain                                                   | 7  |
| IPR025733 | 98.88  | Iron/zinc purple acid phosphatase-like C-terminal domain                      | 7  |
| IPR026003 | 80.29  | HEAT repeat associated with sister chromatid cohesion protein                 | 7  |
| IPR001461 | 99.77  | Aspartic peptidase                                                            | 5  |
| IPR006689 | 98.18  | Small GTPase superfamily, ARF/SAR type                                        | 5  |
| IPR013601 | 95.46  | FAE1/Type III polyketide synthase-like protein                                | 5  |
| IPR001320 | 95.43  | Ionotropic glutamate receptor                                                 | 5  |
| IPR000898 | 94.94  | Indoleamine 2,3-dioxygenase                                                   | 5  |
| IPR001680 | 94.62  | WD40 repeat                                                                   | 5  |

|           |        |                                                                   |   |
|-----------|--------|-------------------------------------------------------------------|---|
| IPR000685 | 91.70  | Ribulose biphosphate carboxylase, large subunit, C-terminal       | 5 |
| IPR008901 | 90.13  | Ceramidase                                                        | 5 |
| IPR000260 | 87.00  | NADH:ubiquinone oxidoreductase, chain 4, N-terminal               | 5 |
| IPR003386 | 82.65  | Lecithin:cholesterol/phospholipid:diacylglycerol acyltransferase  | 5 |
| IPR013922 | 99.46  | Cyclin PHO80-like                                                 | 4 |
| IPR013057 | 97.83  | Amino acid transporter, transmembrane                             | 4 |
| IPR005150 | 97.65  | Cellulose synthase                                                | 4 |
| IPR012317 | 97.33  | Poly(ADP-ribose) polymerase, catalytic domain                     | 4 |
| IPR009818 | 96.92  | Ataxin-2, C-terminal                                              | 4 |
| IPR013866 | 96.35  | Sphingolipid delta4-desaturase, N-terminal                        | 4 |
| IPR023796 | 89.58  | Serpin domain                                                     | 4 |
| IPR013112 | 79.82  | FAD-binding 8                                                     | 4 |
| IPR013907 | 99.49  | Sds3-like                                                         | 3 |
| IPR013098 | 98.45  | Immunoglobulin I-set                                              | 3 |
| IPR006202 | 98,40  | Neurotransmitter-gated ion-channel ligand-binding                 | 3 |
| IPR017443 | 98.34  | Ribulose biphosphate carboxylase, large subunit, N-terminal       | 3 |
| IPR013209 | 97.90  | LNS2, Lipin/Ned1/Smp2                                             | 3 |
| IPR018829 | 91.63  | Domain of unknown function DUF2433                                | 3 |
| IPR010828 | 88.81  | Alcohol acetyltransferase                                         | 3 |
| IPR000768 | 84.42  | NAD:arginine ADP-ribosyltransferase, ART                          | 3 |
| IPR015211 | 77.97  | Peptidase M1, leukotriene A4 hydrolase, aminopeptidase C-terminal | 3 |
| IPR015374 | 75.10  | Chs5p-Arf1p binding                                               | 3 |
| IPR001356 | 99.93  | Homeobox domain                                                   | 2 |
| IPR001767 | 99.40  | Hedgehog protein, Hint domain                                     | 2 |
| IPR001846 | 98.09  | von Willebrand factor, type D domain                              | 2 |
| IPR026750 | 96.54  | Protein N-terminal asparagine amidohydrolase                      | 2 |
| IPR008417 | 94.33  | B-cell receptor-associated protein 29/31                          | 2 |
| IPR000242 | 90.71  | Protein-tyrosine phosphatase, receptor/non-receptor type          | 2 |
| IPR002126 | 84.74  | Cadherin                                                          | 2 |
| IPR013515 | 81.88  | Phytochrome, central region                                       | 2 |
| IPR008496 | 100.00 | Protein of unknown function DUF778                                | 2 |
| IPR012642 | 100.00 | Transcription regulator Wos2-domain                               | 2 |
| IPR001040 | 99.96  | Translation Initiation factor eIF- 4e                             | 1 |
| IPR003123 | 99.92  | Vacuolar sorting protein 9                                        | 1 |
| IPR004214 | 99.92  | Conotoxin                                                         | 1 |
| IPR003151 | 99.77  | PIK-related kinase, FAT                                           | 1 |
| IPR018616 | 99.61  | Guanylyl cyclase                                                  | 1 |
| IPR003690 | 99.49  | Mitochondrial transcription termination factor-related            | 1 |
| IPR014849 | 99.46  | EKC/KEOPS complex, subunit Gon7                                   | 1 |
| IPR007240 | 99.43  | Autophagy-related protein 17                                      | 1 |
| IPR007823 | 99.35  | Methyltransferase-related                                         | 1 |



|           |        |                                                             |   |
|-----------|--------|-------------------------------------------------------------|---|
| IPR006029 | 98.63  | Neurotransmitter-gated ion-channel transmembrane domain     | 1 |
| IPR010036 | 98.14  | Magnesium-dependent phosphatase-1, eukaryotic/arcaheal type | 1 |
| IPR015034 | 97.18  | Protein of unknown function DUF1917                         | 1 |
| IPR025799 | 96.57  | Protein arginine N-methyltransferase                        | 1 |
| IPR004235 | 95.40  | Scytalone dehydratase                                       | 1 |
| IPR001330 | 94.41  | Prenyltransferase/squalene oxidase                          | 1 |
| IPR009836 | 93.15  | Protein of unknown function DUF1399                         | 1 |
| IPR001828 | 92.07  | Extracellular ligand-binding receptor                       | 1 |
| IPR002182 | 88.23  | NB-ARC                                                      | 1 |
| IPR017395 | 85.84  | Chlorophyllase                                              | 1 |
| IPR004201 | 84.02  | CDC48, domain 2                                             | 1 |
| IPR003338 | 81.25  | CDC48, N-terminal subdomain                                 | 1 |
| IPR002895 | 100.00 | Paramecium surface antigen                                  | 1 |
| IPR008606 | 100.00 | Eukaryotic translation initiation factor 4E binding         | 1 |
| IPR015367 | 100.00 | Transcription factor CEP-1, DNA-binding domain              | 1 |
| IPR027846 | 100.00 | Protein of unknown function DUF4564                         | 1 |

\* The percentage indicates the occurrence of each selected domain in eukaryotic sequences according to the Interpro database. \*\* Indicates the number of proteins in the analyzed *Legionella* genomes that contain the selected domains.

**Supplementary Table S4: Small GTPases domains detected in the genus *Legionella* as defined in the CDD ncbi domain database**

| Query        | Hit type     | PSSM-ID | From | To  | E-Value     | Bitscore | Accession  | Short name                | Incompl | Super-family |
|--------------|--------------|---------|------|-----|-------------|----------|------------|---------------------------|---------|--------------|
| ACZGv1_12052 | specific     | 206640  | 11   | 168 | 2.402e-46   | 153.381  | cd00154    | Rab                       | -       | cl21455      |
|              | superfamily  | 328724  | 11   | 168 | 2.402e-46   | 153.381  | cl21455    | P-loop_NTPase superfamily | -       | -            |
|              | non-specific | 197555  | 11   | 171 | 5.86619e-46 | 152.662  | smart00175 | RAB                       | -       | cl27030      |
|              | superfamily  | 331851  | 11   | 171 | 5.86619e-46 | 152.662  | cl27030    | Ras superfamily           | -       | -            |
|              | non-specific | 306559  | 12   | 171 | 8.01284e-42 | 141.872  | pfam00071  | Ras                       | -       | cl27030      |
|              | non-specific | 178657  | 1    | 171 | 2.67464e-29 | 111.174  | PLN03110   | PLN03110                  | -       | cl27030      |
|              | specific     | 224025  | 7    | 206 | 5.96626e-20 | 86.1679  | COG1100    | Gem1                      | -       | cl27030      |
|              | non-specific | 272973  | 12   | 166 | 1.16475e-14 | 70.0933  | TIGR00231  | small_GTP                 | -       | cl27769      |
|              | superfamily  | 332590  | 12   | 166 | 1.16475e-14 | 70.0933  | cl27769    | GTP_EFTU superfamily      | -       | -            |
| ACZGv1_20575 | specific     | 206648  | 16   | 157 | 1.66013e-07 | 48.2216  | cd00882    | Ras_like_GTPase           | -       | cl21455      |
|              | superfamily  | 328724  | 16   | 157 | 1.66013e-07 | 48.2216  | cl21455    | P-loop_NTPase superfamily | -       | -            |
|              | non-specific | 235392  | 85   | 167 | 9.56755e-07 | 47.4127  | PRK05291   | trmE                      | N       | cl26334      |
|              | superfamily  | 331155  | 85   | 167 | 9.56755e-07 | 47.4127  | cl26334    | MnmE_helical superfamily  | N       | -            |
|              | non-specific | 315327  | 85   | 167 | 2.41831e-05 | 43.215   | pfam12631  | MnmE_helical              | NC      | cl26334      |
|              | non-specific | 225171  | 85   | 162 | 0.00775603  | 35.7078  | COG2262    | HflX                      | N       | cl25666      |
|              | superfamily  | 330487  | 85   | 162 | 0.00775603  | 35.7078  | cl25666    | HflX superfamily          | N       | -            |
| ACZGv1_20687 | non-specific | 306559  | 19   | 164 | 1.53966e-44 | 149.191  | pfam00071  | Ras                       | -       | cl27030      |
|              | superfamily  | 331851  | 19   | 164 | 1.53966e-44 | 149.191  | cl27030    | Ras superfamily           | -       | -            |
|              | non-specific | 206661  | 13   | 171 | 2.38378e-41 | 141.312  | cd01869    | Rab1_Ypt1                 | -       | cl21455      |
|              | superfamily  | 328724  | 13   | 171 | 2.38378e-41 | 141.312  | cl21455    | P-loop_NTPase superfamily | -       | -            |
|              | non-specific | 197555  | 19   | 169 | 1.16692e-35 | 126.083  | smart00175 | RAB                       | -       | cl27030      |
|              | non-specific | 178657  | 1    | 200 | 1.98578e-24 | 98.4622  | PLN03110   | PLN03110                  | -       | cl27030      |
|              | specific     | 224025  | 19   | 179 | 1.47733e-16 | 76.9231  | COG1100    | Gem1                      | -       | cl27030      |

|          |              |        |    |     |             |         |            |                           |   |         |
|----------|--------------|--------|----|-----|-------------|---------|------------|---------------------------|---|---------|
|          | specific     | 312094 | 5  | 116 | 3.02945e-25 | 97.5761 | pfam08477  | Roc                       | - | cl21455 |
|          | non-specific | 197555 | 4  | 157 | 1.10899e-23 | 94.8822 | smart00175 | RAB                       | - | cl27030 |
|          | superfamily  | 331851 | 4  | 157 | 1.10899e-23 | 94.8822 | cl27030    | Ras superfamily           | - | -       |
|          | non-specific | 178657 | 4  | 116 | 4.24252e-15 | 73.039  | PLN03110   | PLN03110                  | C | cl27030 |
|          | specific     | 224025 | 1  | 157 | 1.73196e-13 | 68.4487 | COG1100    | Gem1                      | - | cl27030 |
|          | non-specific | 272973 | 4  | 152 | 1.07933e-12 | 64.7005 | TIGR00231  | small_GTP                 | - | cl27769 |
|          | superfamily  | 332590 | 4  | 152 | 1.07933e-12 | 64.7005 | cl27769    | GTP_EFTU superfamily      | - | -       |
| Lade0491 | specific     | 206640 | 9  | 158 | 2.04853e-31 | 114.861 | cd00154    | Rab                       | - | cl21455 |
|          | superfamily  | 328724 | 9  | 158 | 2.04853e-31 | 114.861 | cl21455    | P-loop_NTPase superfamily | - | -       |
|          | non-specific | 306559 | 10 | 161 | 5.69634e-27 | 103.352 | pfam00071  | Ras                       | - | cl27030 |
|          | superfamily  | 331851 | 10 | 161 | 5.69634e-27 | 103.352 | cl27030    | Ras superfamily           | - | -       |
|          | non-specific | 197555 | 9  | 161 | 1.32022e-23 | 94.497  | smart00175 | RAB                       | - | cl27030 |
|          | specific     | 224025 | 7  | 178 | 1.511e-20   | 87.7087 | COG1100    | Gem1                      | - | cl27030 |
|          | non-specific | 272973 | 8  | 151 | 5.02069e-16 | 73.9453 | TIGR00231  | small_GTP                 | - | cl27769 |
|          | superfamily  | 332590 | 8  | 151 | 5.02069e-16 | 73.9453 | cl27769    | GTP_EFTU superfamily      | - | -       |
|          | non-specific | 215587 | 7  | 179 | 1.31048e-13 | 68.5435 | PLN03118   | PLN03118                  | - | cl27030 |
| LanA0292 | specific     | 206640 | 7  | 162 | 4.5342e-34  | 122.565 | cd00154    | Rab                       | - | cl21455 |
|          | superfamily  | 328724 | 7  | 162 | 4.5342e-34  | 122.565 | cl21455    | P-loop_NTPase superfamily | - | -       |
|          | non-specific | 197555 | 7  | 167 | 2.21685e-32 | 118.379 | smart00175 | RAB                       | - | cl27030 |
|          | superfamily  | 331851 | 7  | 167 | 2.21685e-32 | 118.379 | cl27030    | Ras superfamily           | - | -       |
|          | non-specific | 306559 | 8  | 166 | 2.34837e-28 | 107.59  | pfam00071  | Ras                       | - | cl27030 |
|          | specific     | 224025 | 3  | 172 | 1.87668e-18 | 82.3159 | COG1100    | Gem1                      | - | cl27030 |
|          | non-specific | 178657 | 7  | 160 | 8.09715e-18 | 80.743  | PLN03110   | PLN03110                  | C | cl27030 |
|          | non-specific | 272973 | 7  | 160 | 2.5603e-13  | 66.6265 | TIGR00231  | small_GTP                 | - | cl27769 |
|          | superfamily  | 332590 | 7  | 160 | 2.5603e-13  | 66.6265 | cl27769    | GTP_EFTU superfamily      | - | -       |
| LanA2294 | specific     | 206640 | 11 | 168 | 2.22867e-50 | 163.781 | cd00154    | Rab                       | - | cl21455 |
|          | superfamily  | 328724 | 11 | 168 | 2.22867e-50 | 163.781 | cl21455    | P-loop_NTPase superfamily | - | -       |
|          | non-specific | 197555 | 11 | 171 | 2.30788e-46 | 153.433 | smart00175 | RAB                       | - | cl27030 |
|          | superfamily  | 331851 | 11 | 171 | 2.30788e-46 | 153.433 | cl27030    | Ras superfamily           | - | -       |
|          | non-specific | 306559 | 12 | 171 | 4.14007e-42 | 142.643 | pfam00071  | Ras                       | - | cl27030 |

|          |              |        |    |     |             |         |            |                           |   |         |
|----------|--------------|--------|----|-----|-------------|---------|------------|---------------------------|---|---------|
| LanA2326 | non-specific | 178655 | 11 | 171 | 1.08764e-25 | 101.171 | PLN03108   | PLN03108                  | C | cl27030 |
|          | specific     | 224025 | 7  | 187 | 6.91448e-19 | 83.0863 | COG1100    | Gem1                      | - | cl27030 |
|          | non-specific | 272973 | 11 | 160 | 4.82167e-13 | 65.4709 | TIGR00231  | small_GTP                 | - | cl27769 |
|          | superfamily  | 332590 | 11 | 160 | 4.82167e-13 | 65.4709 | cl27769    | GTP_EFTU superfamily      | - | -       |
|          | specific     | 206640 | 50 | 209 | 9.65799e-43 | 142.21  | cd00154    | Rab                       | - | cl21455 |
|          | superfamily  | 328724 | 50 | 209 | 9.65799e-43 | 142.21  | cl21455    | P-loop_NTPase superfamily | - | -       |
|          | non-specific | 306559 | 51 | 208 | 9.41681e-37 | 126.85  | pfam00071  | Ras                       | - | cl27030 |
|          | superfamily  | 331851 | 51 | 208 | 9.41681e-37 | 126.85  | cl27030    | Ras superfamily           | - | -       |
|          | non-specific | 197555 | 50 | 209 | 1.84987e-33 | 118.379 | smart00175 | RAB                       | - | cl27030 |
|          | non-specific | 178655 | 50 | 206 | 2.4349e-20  | 85.378  | PLN03108   | PLN03108                  | C | cl27030 |
| LanA3056 | specific     | 224025 | 48 | 245 | 4.8699e-17  | 76.9231 | COG1100    | Gem1                      | - | cl27030 |
|          | non-specific | 272973 | 50 | 204 | 4.66916e-12 | 62.0041 | TIGR00231  | small_GTP                 | - | cl27769 |
|          | superfamily  | 332590 | 50 | 204 | 4.66916e-12 | 62.0041 | cl27769    | GTP_EFTU superfamily      | - | -       |
|          | specific     | 206640 | 13 | 168 | 2.2556e-42  | 142.98  | cd00154    | Rab                       | - | cl21455 |
|          | superfamily  | 328724 | 13 | 168 | 2.2556e-42  | 142.98  | cl21455    | P-loop_NTPase superfamily | - | -       |
|          | non-specific | 197555 | 13 | 173 | 1.87572e-40 | 138.025 | smart00175 | RAB                       | - | cl27030 |
|          | superfamily  | 331851 | 13 | 173 | 1.87572e-40 | 138.025 | cl27030    | Ras superfamily           | - | -       |
|          | non-specific | 306559 | 14 | 173 | 2.26867e-40 | 138.02  | pfam00071  | Ras                       | - | cl27030 |
|          | non-specific | 178657 | 1  | 173 | 3.67582e-30 | 113.1   | PLN03110   | PLN03110                  | - | cl27030 |
|          | specific     | 224025 | 9  | 189 | 4.72968e-21 | 88.8643 | COG1100    | Gem1                      | - | cl27030 |
| LanB0265 | non-specific | 272973 | 13 | 161 | 6.89894e-12 | 62.3893 | TIGR00231  | small_GTP                 | - | cl27769 |
|          | superfamily  | 332590 | 13 | 161 | 6.89894e-12 | 62.3893 | cl27769    | GTP_EFTU superfamily      | - | -       |
|          | specific     | 206640 | 13 | 168 | 2.2556e-42  | 142.98  | cd00154    | Rab                       | - | cl21455 |
|          | superfamily  | 328724 | 13 | 168 | 2.2556e-42  | 142.98  | cl21455    | P-loop_NTPase superfamily | - | -       |
|          | non-specific | 197555 | 13 | 173 | 1.87572e-40 | 138.025 | smart00175 | RAB                       | - | cl27030 |
|          | superfamily  | 331851 | 13 | 173 | 1.87572e-40 | 138.025 | cl27030    | Ras superfamily           | - | -       |
|          | non-specific | 306559 | 14 | 173 | 2.26867e-40 | 138.02  | pfam00071  | Ras                       | - | cl27030 |
|          | non-specific | 178657 | 1  | 173 | 3.67582e-30 | 113.1   | PLN03110   | PLN03110                  | - | cl27030 |
|          | specific     | 224025 | 9  | 189 | 4.72968e-21 | 88.8643 | COG1100    | Gem1                      | - | cl27030 |
|          | non-specific | 272973 | 13 | 161 | 6.89894e-12 | 62.3893 | TIGR00231  | small_GTP                 | - | cl27769 |

|          |              |        |    |     |             |         |            |                           |   |         |
|----------|--------------|--------|----|-----|-------------|---------|------------|---------------------------|---|---------|
| LanB0321 | superfamily  | 332590 | 13 | 161 | 6.89894e-12 | 62.3893 | cl27769    | GTP_EFTU superfamily      | - | -       |
|          | specific     | 206640 | 50 | 209 | 9.65799e-43 | 142.21  | cd00154    | Rab                       | - | cl21455 |
|          | superfamily  | 328724 | 50 | 209 | 9.65799e-43 | 142.21  | cl21455    | P-loop_NTPase superfamily | - | -       |
|          | non-specific | 306559 | 51 | 208 | 9.41681e-37 | 126.85  | pfam00071  | Ras                       | - | cl27030 |
|          | superfamily  | 331851 | 51 | 208 | 9.41681e-37 | 126.85  | cl27030    | Ras superfamily           | - | -       |
|          | non-specific | 197555 | 50 | 209 | 1.84987e-33 | 118.379 | smart00175 | RAB                       | - | cl27030 |
|          | non-specific | 178655 | 50 | 206 | 2.4349e-20  | 85.378  | PLN03108   | PLN03108                  | C | cl27030 |
|          | specific     | 224025 | 48 | 245 | 4.8699e-17  | 76.9231 | COG1100    | Gem1                      | - | cl27030 |
| LanB1276 | non-specific | 272973 | 50 | 204 | 4.66916e-12 | 62.0041 | TIGR00231  | small_GTP                 | - | cl27769 |
|          | superfamily  | 332590 | 50 | 204 | 4.66916e-12 | 62.0041 | cl27769    | GTP_EFTU superfamily      | - | -       |
|          | specific     | 206640 | 7  | 162 | 4.5342e-34  | 122.565 | cd00154    | Rab                       | - | cl21455 |
|          | superfamily  | 328724 | 7  | 162 | 4.5342e-34  | 122.565 | cl21455    | P-loop_NTPase superfamily | - | -       |
|          | non-specific | 197555 | 7  | 167 | 2.21685e-32 | 118.379 | smart00175 | RAB                       | - | cl27030 |
|          | superfamily  | 331851 | 7  | 167 | 2.21685e-32 | 118.379 | cl27030    | Ras superfamily           | - | -       |
|          | non-specific | 306559 | 8  | 166 | 2.34837e-28 | 107.59  | pfam00071  | Ras                       | - | cl27030 |
|          | specific     | 224025 | 3  | 172 | 1.87668e-18 | 82.3159 | COG1100    | Gem1                      | - | cl27030 |
| LanB2255 | non-specific | 178657 | 7  | 160 | 8.09715e-18 | 80.743  | PLN03110   | PLN03110                  | C | cl27030 |
|          | non-specific | 272973 | 7  | 160 | 2.5603e-13  | 66.6265 | TIGR00231  | small_GTP                 | - | cl27769 |
|          | superfamily  | 332590 | 7  | 160 | 2.5603e-13  | 66.6265 | cl27769    | GTP_EFTU superfamily      | - | -       |
|          | specific     | 206640 | 11 | 168 | 2.22867e-50 | 163.781 | cd00154    | Rab                       | - | cl21455 |
|          | superfamily  | 328724 | 11 | 168 | 2.22867e-50 | 163.781 | cl21455    | P-loop_NTPase superfamily | - | -       |
|          | non-specific | 197555 | 11 | 171 | 2.30788e-46 | 153.433 | smart00175 | RAB                       | - | cl27030 |
|          | superfamily  | 331851 | 11 | 171 | 2.30788e-46 | 153.433 | cl27030    | Ras superfamily           | - | -       |
|          | non-specific | 306559 | 12 | 171 | 4.14007e-42 | 142.643 | pfam00071  | Ras                       | - | cl27030 |
| Lbe0211  | non-specific | 178655 | 11 | 171 | 1.08764e-25 | 101.171 | PLN03108   | PLN03108                  | C | cl27030 |
|          | specific     | 224025 | 7  | 187 | 6.91448e-19 | 83.0863 | COG1100    | Gem1                      | - | cl27030 |
|          | non-specific | 272973 | 11 | 160 | 4.82167e-13 | 65.4709 | TIGR00231  | small_GTP                 | - | cl27769 |
|          | superfamily  | 332590 | 11 | 160 | 4.82167e-13 | 65.4709 | cl27769    | GTP_EFTU superfamily      | - | -       |
|          | specific     | 224025 | 1  | 172 | 7.57463e-12 | 63.8263 | COG1100    | Gem1                      | - | cl27030 |
|          | superfamily  | 331851 | 1  | 172 | 7.57463e-12 | 63.8263 | cl27030    | Ras superfamily           | - | -       |

|          |              |        |     |     |             |         |            |                           |    |         |
|----------|--------------|--------|-----|-----|-------------|---------|------------|---------------------------|----|---------|
|          | non-specific | 306559 | 6   | 113 | 1.72817e-11 | 61.3656 | pfam00071  | Ras                       | C  | cl27030 |
|          | non-specific | 206641 | 5   | 161 | 4.95471e-10 | 57.5538 | cd00157    | Rho                       | -  | cl21455 |
|          | superfamily  | 328724 | 5   | 161 | 4.95471e-10 | 57.5538 | cl21455    | P-loop_NTPase superfamily | -  | -       |
|          | non-specific | 197554 | 8   | 161 | 1.97806e-08 | 53.001  | smart00174 | RHO                       | -  | cl27030 |
|          | non-specific | 272973 | 4   | 113 | 3.86638e-06 | 46.2109 | TIGR00231  | small_GTP                 | C  | cl27769 |
|          | superfamily  | 332590 | 4   | 113 | 3.86638e-06 | 46.2109 | cl27769    | GTP_EFTU superfamily      | C  | -       |
| Lbe0872  | non-specific | 206640 | 147 | 320 | 3.35816e-20 | 86.741  | cd00154    | Rab                       | -  | cl21455 |
|          | superfamily  | 328724 | 147 | 320 | 3.35816e-20 | 86.741  | cl21455    | P-loop_NTPase superfamily | -  | -       |
|          | non-specific | 306559 | 151 | 313 | 1.59078e-13 | 67.914  | pfam00071  | Ras                       | -  | cl27030 |
|          | superfamily  | 331851 | 151 | 313 | 1.59078e-13 | 67.914  | cl27030    | Ras superfamily           | -  | -       |
|          | non-specific | 197555 | 147 | 313 | 1.20745e-09 | 56.7475 | smart00175 | RAB                       | -  | cl27030 |
|          | non-specific | 272973 | 148 | 318 | 3.18876e-06 | 46.5961 | TIGR00231  | small_GTP                 | -  | cl27769 |
|          | superfamily  | 332590 | 148 | 318 | 3.18876e-06 | 46.5961 | cl27769    | GTP_EFTU superfamily      | -  | -       |
|          | specific     | 224025 | 147 | 339 | 1.4221e-05  | 45.7219 | COG1100    | Gem1                      | -  | cl27030 |
|          | non-specific | 235392 | 223 | 318 | 0.00207388  | 40.0939 | PRK05291   | trmE                      | N  | cl26334 |
|          | superfamily  | 331155 | 223 | 318 | 0.00207388  | 40.0939 | cl26334    | MnmE_helical superfamily  | N  | -       |
| Lbir0344 | non-specific | 206640 | 701 | 854 | 2.21853e-15 | 74.4146 | cd00154    | Rab                       | -  | cl21455 |
|          | superfamily  | 328724 | 701 | 854 | 2.21853e-15 | 74.4146 | cl21455    | P-loop_NTPase superfamily | -  | -       |
|          | non-specific | 306559 | 701 | 854 | 5.81696e-12 | 64.4472 | pfam00071  | Ras                       | -  | cl27030 |
|          | superfamily  | 331851 | 701 | 854 | 5.81696e-12 | 64.4472 | cl27030    | Ras superfamily           | -  | -       |
|          | non-specific | 197555 | 701 | 859 | 7.49066e-11 | 61.3699 | smart00175 | RAB                       | -  | cl27030 |
|          | specific     | 224025 | 701 | 872 | 1.09404e-05 | 47.2627 | COG1100    | Gem1                      | -  | cl27030 |
|          | non-specific | 272973 | 701 | 849 | 3.53187e-05 | 44.6701 | TIGR00231  | small_GTP                 | -  | cl27769 |
|          | superfamily  | 332590 | 701 | 849 | 3.53187e-05 | 44.6701 | cl27769    | GTP_EFTU superfamily      | -  | -       |
|          | non-specific | 215587 | 691 | 853 | 4.85968e-05 | 45.4315 | PLN03118   | PLN03118                  | -  | cl27030 |
| Lbir0398 | specific     | 206648 | 14  | 168 | 1.69366e-07 | 50.1476 | cd00882    | Ras_like_GTPase           | -  | cl21455 |
|          | superfamily  | 328724 | 14  | 168 | 1.69366e-07 | 50.1476 | cl21455    | P-loop_NTPase superfamily | -  | -       |
|          | non-specific | 234624 | 59  | 191 | 0.0010655   | 40.4159 | PRK00089   | era                       | NC | cl26333 |
|          | superfamily  | 331154 | 59  | 191 | 0.0010655   | 40.4159 | cl26333    | FeoB_N superfamily        | NC | -       |
|          | non-specific | 316621 | 270 | 329 | 0.00311408  | 36.342  | pfam14110  | DUF4282                   | C  | cl16622 |

|          |              |        |     |     |             |         |            |                           |   |         |
|----------|--------------|--------|-----|-----|-------------|---------|------------|---------------------------|---|---------|
| Lbir1602 | superfamily  | 316621 | 270 | 329 | 0.00311408  | 36.342  | cl16622    | DUF4282 superfamily       | C | -       |
|          | specific     | 206648 | 45  | 189 | 1.69444e-08 | 52.844  | cd00882    | Ras_like_GTPase           | - | cl21455 |
|          | superfamily  | 328724 | 45  | 189 | 1.69444e-08 | 52.844  | cl21455    | P-loop_NTPase superfamily | - | -       |
|          | non-specific | 197555 | 106 | 187 | 0.00033877  | 40.1839 | smart00175 | RAB                       | N | cl27030 |
| Lbir1737 | superfamily  | 331851 | 106 | 187 | 0.00033877  | 40.1839 | cl27030    | Ras superfamily           | N | -       |
|          | specific     | 224025 | 38  | 223 | 0.00621197  | 37.2475 | COG1100    | Gem1                      | - | cl27030 |
|          | specific     | 206640 | 15  | 175 | 1.29041e-47 | 152.995 | cd00154    | Rab                       | - | cl21455 |
|          | superfamily  | 328724 | 15  | 175 | 1.29041e-47 | 152.995 | cl21455    | P-loop_NTPase superfamily | - | -       |
|          | non-specific | 306559 | 16  | 177 | 5.21734e-44 | 143.798 | pfam00071  | Ras                       | - | cl27030 |
|          | superfamily  | 331851 | 16  | 177 | 5.21734e-44 | 143.798 | cl27030    | Ras superfamily           | - | -       |
|          | non-specific | 197555 | 16  | 175 | 1.39069e-37 | 127.624 | smart00175 | RAB                       | - | cl27030 |
|          | non-specific | 178655 | 16  | 172 | 5.54946e-27 | 101.556 | PLN03108   | PLN03108                  | C | cl27030 |
| Lbir2252 | specific     | 224025 | 11  | 177 | 5.75084e-18 | 78.0787 | COG1100    | Gem1                      | - | cl27030 |
|          | non-specific | 272973 | 16  | 170 | 1.70852e-13 | 65.0857 | TIGR00231  | small_GTP                 | - | cl27769 |
|          | superfamily  | 332590 | 16  | 170 | 1.70852e-13 | 65.0857 | cl27769    | GTP_EFTU superfamily      | - | -       |
|          | specific     | 206640 | 4   | 149 | 1.58779e-27 | 103.305 | cd00154    | Rab                       | - | cl21455 |
|          | superfamily  | 328724 | 4   | 149 | 1.58779e-27 | 103.305 | cl21455    | P-loop_NTPase superfamily | - | -       |
|          | non-specific | 197555 | 4   | 149 | 3.33872e-20 | 84.0967 | smart00175 | RAB                       | - | cl27030 |
|          | superfamily  | 331851 | 4   | 149 | 3.33872e-20 | 84.0967 | cl27030    | Ras superfamily           | - | -       |
|          | non-specific | 306559 | 5   | 149 | 1.82057e-19 | 82.1664 | pfam00071  | Ras                       | - | cl27030 |
|          | specific     | 224025 | 1   | 116 | 9.10264e-16 | 73.8415 | COG1100    | Gem1                      | C | cl27030 |
|          | non-specific | 272973 | 3   | 152 | 3.86047e-11 | 59.6929 | TIGR00231  | small_GTP                 | - | cl27769 |
| Lbir3188 | superfamily  | 332590 | 3   | 152 | 3.86047e-11 | 59.6929 | cl27769    | GTP_EFTU superfamily      | - | -       |
|          | non-specific | 215587 | 2   | 149 | 4.77937e-08 | 51.9799 | PLN03118   | PLN03118                  | C | cl27030 |
|          | non-specific | 206640 | 88  | 163 | 2.34981e-05 | 43.5987 | cd00154    | Rab                       | N | cl21455 |
|          | superfamily  | 328724 | 88  | 163 | 2.34981e-05 | 43.5987 | cl21455    | P-loop_NTPase superfamily | N | -       |
|          | non-specific | 306559 | 113 | 161 | 0.0088704   | 35.9424 | pfam00071  | Ras                       | N | cl27030 |
| LboA1497 | superfamily  | 331851 | 113 | 161 | 0.0088704   | 35.9424 | cl27030    | Ras superfamily           | N | -       |
|          | specific     | 206640 | 7   | 161 | 1.13152e-34 | 124.105 | cd00154    | Rab                       | - | cl21455 |
|          | superfamily  | 328724 | 7   | 161 | 1.13152e-34 | 124.105 | cl21455    | P-loop_NTPase superfamily | - | -       |

|          |              |        |    |     |             |         |            |                           |   |         |
|----------|--------------|--------|----|-----|-------------|---------|------------|---------------------------|---|---------|
|          | non-specific | 306559 | 8  | 164 | 1.49766e-27 | 105.278 | pfam00071  | Ras                       | - | cl27030 |
|          | superfamily  | 331851 | 8  | 164 | 1.49766e-27 | 105.278 | cl27030    | Ras superfamily           | - | -       |
|          | non-specific | 197555 | 7  | 161 | 7.08163e-27 | 103.742 | smart00175 | RAB                       | - | cl27030 |
|          | specific     | 224025 | 6  | 194 | 2.50024e-17 | 79.2343 | COG1100    | Gem1                      | - | cl27030 |
|          | non-specific | 178657 | 7  | 159 | 4.81685e-16 | 75.7354 | PLN03110   | PLN03110                  | C | cl27030 |
|          | non-specific | 272973 | 6  | 159 | 2.0884e-14  | 69.7081 | TIGR00231  | small_GTP                 | - | cl27769 |
|          | superfamily  | 332590 | 6  | 159 | 2.0884e-14  | 69.7081 | cl27769    | GTP_EFTU superfamily      | - | -       |
| LboA2428 | specific     | 206640 | 11 | 170 | 1.24534e-50 | 164.551 | cd00154    | Rab                       | - | cl21455 |
|          | superfamily  | 328724 | 11 | 170 | 1.24534e-50 | 164.551 | cl21455    | P-loop_NTPase superfamily | - | -       |
|          | non-specific | 197555 | 11 | 173 | 2.06879e-46 | 153.818 | smart00175 | RAB                       | - | cl27030 |
|          | superfamily  | 331851 | 11 | 173 | 2.06879e-46 | 153.818 | cl27030    | Ras superfamily           | - | -       |
|          | non-specific | 306559 | 12 | 173 | 1.20451e-41 | 141.487 | pfam00071  | Ras                       | - | cl27030 |
|          | non-specific | 178657 | 1  | 173 | 3.37259e-25 | 100.003 | PLN03110   | PLN03110                  | - | cl27030 |
|          | specific     | 224025 | 7  | 206 | 9.03354e-19 | 82.7011 | COG1100    | Gem1                      | - | cl27030 |
|          | non-specific | 272973 | 11 | 161 | 2.16891e-12 | 63.9301 | TIGR00231  | small_GTP                 | - | cl27769 |
|          | superfamily  | 332590 | 11 | 161 | 2.16891e-12 | 63.9301 | cl27769    | GTP_EFTU superfamily      | - | -       |
| LboA2457 | specific     | 206640 | 30 | 189 | 4.03002e-46 | 149.914 | cd00154    | Rab                       | - | cl21455 |
|          | superfamily  | 328724 | 30 | 189 | 4.03002e-46 | 149.914 | cl21455    | P-loop_NTPase superfamily | - | -       |
|          | non-specific | 306559 | 31 | 188 | 9.07757e-39 | 131.087 | pfam00071  | Ras                       | - | cl27030 |
|          | superfamily  | 331851 | 31 | 188 | 9.07757e-39 | 131.087 | cl27030    | Ras superfamily           | - | -       |
|          | non-specific | 197555 | 30 | 189 | 4.26421e-36 | 124.543 | smart00175 | RAB                       | - | cl27030 |
|          | non-specific | 178655 | 30 | 186 | 1.48136e-23 | 93.4672 | PLN03108   | PLN03108                  | C | cl27030 |
|          | specific     | 224025 | 28 | 188 | 8.75179e-22 | 88.8643 | COG1100    | Gem1                      | - | cl27030 |
|          | non-specific | 272973 | 30 | 184 | 3.24841e-15 | 70.0933 | TIGR00231  | small_GTP                 | - | cl27769 |
|          | superfamily  | 332590 | 30 | 184 | 3.24841e-15 | 70.0933 | cl27769    | GTP_EFTU superfamily      | - | -       |
| LboB0786 | non-specific | 206640 | 13 | 64  | 1.25037e-10 | 53.999  | cd00154    | Rab                       | N | cl21455 |
|          | superfamily  | 328724 | 13 | 64  | 1.25037e-10 | 53.999  | cl21455    | P-loop_NTPase superfamily | N | -       |
|          | non-specific | 306559 | 2  | 63  | 1.114e-09   | 51.7356 | pfam00071  | Ras                       | N | cl27030 |
|          | superfamily  | 331851 | 2  | 63  | 1.114e-09   | 51.7356 | cl27030    | Ras superfamily           | N | -       |
|          | non-specific | 197555 | 13 | 64  | 3.03073e-07 | 45.1915 | smart00175 | RAB                       | N | cl27030 |



|          |              |              |        |     |             |            |            |                           |                           |         |         |
|----------|--------------|--------------|--------|-----|-------------|------------|------------|---------------------------|---------------------------|---------|---------|
| LboB0787 | non-specific | 178655       | 13     | 61  | 0.000110801 | 38.7688    | PLN03108   | PLN03108                  | NC                        | cl27030 |         |
|          | non-specific | 206640       | 30     | 117 | 6.58605e-26 | 94.445     | cd00154    | Rab                       | C                         | cl21455 |         |
|          | superfamily  | 328724       | 30     | 117 | 6.58605e-26 | 94.445     | cl21455    | P-loop_NTPase superfamily | C                         | -       |         |
|          | non-specific | 197555       | 30     | 116 | 4.36327e-20 | 79.8595    | smart00175 | RAB                       | C                         | cl27030 |         |
|          | superfamily  | 331851       | 30     | 116 | 4.36327e-20 | 79.8595    | cl27030    | Ras superfamily           | C                         | -       |         |
|          | non-specific | 306559       | 31     | 121 | 2.09821e-19 | 77.9292    | pfam00071  | Ras                       | C                         | cl27030 |         |
|          | specific     | 224025       | 29     | 114 | 9.74167e-15 | 66.9079    | COG1100    | Gem1                      | C                         | cl27030 |         |
|          | non-specific | 215587       | 29     | 116 | 1.52593e-11 | 58.5283    | PLN03118   | PLN03118                  | C                         | cl27030 |         |
|          | non-specific | 272973       | 30     | 111 | 1.46925e-07 | 46.9813    | TIGR00231  | small_GTP                 | C                         | cl27769 |         |
|          | superfamily  | 332590       | 30     | 111 | 1.46925e-07 | 46.9813    | cl27769    | GTP_EFTU superfamily      | C                         | -       |         |
| LboB0816 | specific     | 206640       | 11     | 170 | 4.27427e-51 | 165.707    | cd00154    | Rab                       | -                         | cl21455 |         |
|          | superfamily  | 328724       | 11     | 170 | 4.27427e-51 | 165.707    | cl21455    | P-loop_NTPase superfamily | -                         | -       |         |
|          | non-specific | 197555       | 11     | 173 | 6.39482e-47 | 154.973    | smart00175 | RAB                       | -                         | cl27030 |         |
|          | superfamily  | 331851       | 11     | 173 | 6.39482e-47 | 154.973    | cl27030    | Ras superfamily           | -                         | -       |         |
|          | non-specific | 306559       | 12     | 173 | 3.46849e-42 | 143.028    | pfam00071  | Ras                       | -                         | cl27030 |         |
|          | non-specific | 178657       | 1      | 173 | 3.06008e-26 | 103.085    | PLN03110   | PLN03110                  | -                         | cl27030 |         |
|          | specific     | 224025       | 7      | 206 | 5.78948e-19 | 83.4715    | COG1100    | Gem1                      | -                         | cl27030 |         |
|          | non-specific | 272973       | 11     | 161 | 3.50251e-13 | 65.8561    | TIGR00231  | small_GTP                 | -                         | cl27769 |         |
|          | superfamily  | 332590       | 11     | 161 | 3.50251e-13 | 65.8561    | cl27769    | GTP_EFTU superfamily      | -                         | -       |         |
|          | specific     | 206640       | 7      | 161 | 1.53852e-34 | 123.72     | cd00154    | Rab                       | -                         | cl21455 |         |
| LboB2421 | superfamily  | 328724       | 7      | 161 | 1.53852e-34 | 123.72     | cl21455    | P-loop_NTPase superfamily | -                         | -       |         |
|          | non-specific | 306559       | 8      | 164 | 7.62868e-27 | 103.352    | pfam00071  | Ras                       | -                         | cl27030 |         |
|          | superfamily  | 331851       | 8      | 164 | 7.62868e-27 | 103.352    | cl27030    | Ras superfamily           | -                         | -       |         |
|          | non-specific | 197555       | 7      | 161 | 2.71484e-26 | 102.201    | smart00175 | RAB                       | -                         | cl27030 |         |
|          | specific     | 224025       | 6      | 194 | 1.74601e-18 | 82.7011    | COG1100    | Gem1                      | -                         | cl27030 |         |
|          | non-specific | 178657       | 7      | 159 | 1.26805e-16 | 77.2762    | PLN03110   | PLN03110                  | C                         | cl27030 |         |
|          | non-specific | 272973       | 6      | 159 | 2.2163e-14  | 69.7081    | TIGR00231  | small_GTP                 | -                         | cl27769 |         |
|          | superfamily  | 332590       | 6      | 159 | 2.2163e-14  | 69.7081    | cl27769    | GTP_EFTU superfamily      | -                         | -       |         |
|          | Lbru0408     | non-specific | 206640 | 9   | 171         | 3.5981e-16 | 74.7998    | cd00154                   | Rab                       | -       | cl21455 |
|          |              | superfamily  | 328724 | 9   | 171         | 3.5981e-16 | 74.7998    | cl21455                   | P-loop_NTPase superfamily | -       | -       |

|          |              |        |    |     |             |         |            |                           |   |         |
|----------|--------------|--------|----|-----|-------------|---------|------------|---------------------------|---|---------|
|          | non-specific | 312094 | 10 | 125 | 1.49917e-15 | 71.7677 | pfam08477  | Roc                       | - | cl21455 |
|          | specific     | 224025 | 4  | 187 | 3.67476e-12 | 64.5967 | COG1100    | Gem1                      | - | cl27030 |
|          | superfamily  | 331851 | 4  | 187 | 3.67476e-12 | 64.5967 | cl27030    | Ras superfamily           | - | -       |
|          | non-specific | 197555 | 9  | 159 | 4.71138e-12 | 63.2959 | smart00175 | RAB                       | - | cl27030 |
|          | non-specific | 272973 | 8  | 166 | 1.00657e-08 | 53.5297 | TIGR00231  | small_GTP                 | - | cl27769 |
|          | superfamily  | 332590 | 8  | 166 | 1.00657e-08 | 53.5297 | cl27769    | GTP_EFTU superfamily      | - | -       |
|          | non-specific | 178655 | 9  | 194 | 1.6705e-07  | 51.0952 | PLN03108   | PLN03108                  | - | cl27030 |
| Lbru1073 | non-specific | 206640 | 5  | 168 | 3.61815e-22 | 90.9782 | cd00154    | Rab                       | - | cl21455 |
|          | superfamily  | 328724 | 5  | 168 | 3.61815e-22 | 90.9782 | cl21455    | P-loop_NTPase superfamily | - | -       |
|          | non-specific | 312094 | 5  | 121 | 6.05862e-14 | 67.1454 | pfam08477  | Roc                       | - | cl21455 |
|          | non-specific | 197555 | 5  | 160 | 2.86201e-13 | 66.7627 | smart00175 | RAB                       | - | cl27030 |
|          | superfamily  | 331851 | 5  | 160 | 2.86201e-13 | 66.7627 | cl27030    | Ras superfamily           | - | -       |
|          | specific     | 224025 | 1  | 160 | 2.21777e-12 | 65.3671 | COG1100    | Gem1                      | C | cl27030 |
|          | non-specific | 237048 | 81 | 170 | 2.21717e-06 | 48.5281 | PRK12299   | obgE                      | N | cl25666 |
|          | superfamily  | 330487 | 81 | 170 | 2.21717e-06 | 48.5281 | cl25666    | HflX superfamily          | N | -       |
|          | non-specific | 274271 | 81 | 168 | 0.000439249 | 41.2533 | TIGR02729  | Obg_CgtA                  | N | cl25666 |
| Lbru2537 | specific     | 206640 | 11 | 167 | 3.83608e-30 | 112.549 | cd00154    | Rab                       | - | cl21455 |
|          | superfamily  | 328724 | 11 | 167 | 3.83608e-30 | 112.549 | cl21455    | P-loop_NTPase superfamily | - | -       |
|          | specific     | 312094 | 12 | 121 | 7.46952e-26 | 99.8873 | pfam08477  | Roc                       | - | cl21455 |
|          | specific     | 224025 | 6  | 197 | 4.95062e-22 | 92.7163 | COG1100    | Gem1                      | - | cl27030 |
|          | superfamily  | 331851 | 6  | 197 | 4.95062e-22 | 92.7163 | cl27030    | Ras superfamily           | - | -       |
|          | non-specific | 197555 | 11 | 179 | 2.49236e-21 | 89.1043 | smart00175 | RAB                       | - | cl27030 |
|          | non-specific | 272973 | 10 | 155 | 5.92676e-14 | 68.5525 | TIGR00231  | small_GTP                 | - | cl27769 |
|          | superfamily  | 332590 | 10 | 155 | 5.92676e-14 | 68.5525 | cl27769    | GTP_EFTU superfamily      | - | -       |
|          | non-specific | 178657 | 12 | 188 | 1.13355e-13 | 69.187  | PLN03110   | PLN03110                  | - | cl27030 |
| Lbu0304  | non-specific | 206640 | 4  | 170 | 1.7329e-08  | 52.8434 | cd00154    | Rab                       | - | cl21455 |
|          | superfamily  | 328724 | 4  | 170 | 1.7329e-08  | 52.8434 | cl21455    | P-loop_NTPase superfamily | - | -       |
|          | non-specific | 312094 | 5  | 134 | 4.9932e-06  | 44.8038 | pfam08477  | Roc                       | - | cl21455 |
|          | non-specific | 272973 | 4  | 177 | 6.37911e-05 | 42.7442 | TIGR00231  | small_GTP                 | - | cl27769 |
|          | superfamily  | 332590 | 4  | 177 | 6.37911e-05 | 42.7442 | cl27769    | GTP_EFTU superfamily      | - | -       |

|          |              |        |    |     |             |         |            |                           |   |         |
|----------|--------------|--------|----|-----|-------------|---------|------------|---------------------------|---|---------|
| Lbu2365  | specific     | 224025 | 1  | 190 | 0.000232951 | 41.8699 | COG1100    | Gem1                      | C | cl27030 |
|          | superfamily  | 331851 | 1  | 190 | 0.000232951 | 41.8699 | cl27030    | Ras superfamily           | C | -       |
|          | non-specific | 206640 | 3  | 155 | 5.7303e-14  | 68.2514 | cd00154    | Rab                       | - | cl21455 |
|          | superfamily  | 328724 | 3  | 155 | 5.7303e-14  | 68.2514 | cl21455    | P-loop_NTPase superfamily | - | -       |
|          | non-specific | 312094 | 4  | 117 | 2.75058e-11 | 59.4414 | pfam08477  | Roc                       | - | cl21455 |
|          | non-specific | 128473 | 9  | 117 | 7.70798e-10 | 57.7139 | smart00176 | RAN                       | C | cl27030 |
|          | superfamily  | 331851 | 9  | 117 | 7.70798e-10 | 57.7139 | cl27030    | Ras superfamily           | C | -       |
|          | non-specific | 178620 | 4  | 117 | 3.5211e-09  | 55.913  | PLN03071   | PLN03071                  | C | cl27030 |
|          | specific     | 224025 | 2  | 212 | 1.49697e-07 | 51.1147 | COG1100    | Gem1                      | - | cl27030 |
| Lche0226 | non-specific | 272973 | 3  | 173 | 2.71854e-07 | 49.2925 | TIGR00231  | small_GTP                 | - | cl27769 |
|          | superfamily  | 332590 | 3  | 173 | 2.71854e-07 | 49.2925 | cl27769    | GTP_EFTU superfamily      | - | -       |
|          | specific     | 206640 | 3  | 153 | 6.95755e-30 | 111.394 | cd00154    | Rab                       | - | cl21455 |
|          | superfamily  | 328724 | 3  | 153 | 6.95755e-30 | 111.394 | cl21455    | P-loop_NTPase superfamily | - | -       |
|          | non-specific | 306559 | 4  | 155 | 1.07745e-22 | 92.1815 | pfam00071  | Ras                       | - | cl27030 |
|          | superfamily  | 331851 | 4  | 155 | 1.07745e-22 | 92.1815 | cl27030    | Ras superfamily           | - | -       |
|          | non-specific | 197555 | 3  | 150 | 5.37082e-20 | 84.8671 | smart00175 | RAB                       | - | cl27030 |
|          | non-specific | 272973 | 3  | 155 | 3.08623e-14 | 69.3229 | TIGR00231  | small_GTP                 | - | cl27769 |
|          | superfamily  | 332590 | 3  | 155 | 3.08623e-14 | 69.3229 | cl27769    | GTP_EFTU superfamily      | - | -       |
| Lche1463 | non-specific | 178657 | 3  | 153 | 3.38949e-11 | 61.8682 | PLN03110   | PLN03110                  | C | cl27030 |
|          | specific     | 224025 | 2  | 205 | 6.87715e-11 | 60.7447 | COG1100    | Gem1                      | - | cl27030 |
|          | specific     | 206648 | 17 | 174 | 7.98537e-13 | 65.1703 | cd00882    | Ras_like_GTPase           | - | cl21455 |
|          | superfamily  | 328724 | 17 | 174 | 7.98537e-13 | 65.1703 | cl21455    | P-loop_NTPase superfamily | - | -       |
|          | non-specific | 225138 | 4  | 174 | 3.50635e-09 | 55.5442 | COG2229    | Srp102                    | - | cl21455 |
|          | non-specific | 287615 | 15 | 38  | 0.00170432  | 38.0208 | pfam10662  | PduV-EutP                 | C | cl21455 |
|          | specific     | 214640 | 12 | 142 | 0.0084353   | 36.1973 | smart00382 | AAA                       | - | cl28181 |
|          | superfamily  | 333001 | 12 | 142 | 0.0084353   | 36.1973 | cl28181    | AAA superfamily           | - | -       |
|          | non-specific | 206640 | 62 | 149 | 3.58041e-08 | 52.4582 | cd00154    | Rab                       | N | cl21455 |
| Lche2249 | superfamily  | 328724 | 62 | 149 | 3.58041e-08 | 52.4582 | cl21455    | P-loop_NTPase superfamily | N | -       |
|          | non-specific | 197555 | 62 | 135 | 6.71771e-06 | 45.9619 | smart00175 | RAB                       | N | cl27030 |
|          | superfamily  | 331851 | 62 | 135 | 6.71771e-06 | 45.9619 | cl27030    | Ras superfamily           | N | -       |

|          |              |        |    |     |             |         |            |                           |    |         |
|----------|--------------|--------|----|-----|-------------|---------|------------|---------------------------|----|---------|
| Lche2737 | non-specific | 306559 | 62 | 135 | 7.82568e-06 | 45.5724 | pfam00071  | Ras                       | N  | cl27030 |
|          | specific     | 206640 | 11 | 170 | 6.01158e-53 | 170.329 | cd00154    | Rab                       | -  | cl21455 |
|          | superfamily  | 328724 | 11 | 170 | 6.01158e-53 | 170.329 | cl21455    | P-loop_NTPase superfamily | -  | -       |
|          | non-specific | 197555 | 11 | 173 | 1.03361e-51 | 167.685 | smart00175 | RAB                       | -  | cl27030 |
|          | superfamily  | 331851 | 11 | 173 | 1.03361e-51 | 167.685 | cl27030    | Ras superfamily           | -  | -       |
|          | non-specific | 306559 | 12 | 173 | 3.25567e-50 | 163.443 | pfam00071  | Ras                       | -  | cl27030 |
|          | non-specific | 178657 | 1  | 177 | 3.15908e-36 | 129.278 | PLN03110   | PLN03110                  | -  | cl27030 |
|          | specific     | 224025 | 7  | 186 | 2.5892e-23  | 95.4127 | COG1100    | Gem1                      | -  | cl27030 |
|          | non-specific | 272973 | 11 | 162 | 1.08857e-14 | 70.0933 | TIGR00231  | small_GTP                 | -  | cl27769 |
| Lche2767 | superfamily  | 332590 | 11 | 162 | 1.08857e-14 | 70.0933 | cl27769    | GTP_EFTU superfamily      | -  | -       |
|          | specific     | 206640 | 26 | 185 | 5.11451e-44 | 143.751 | cd00154    | Rab                       | -  | cl21455 |
|          | superfamily  | 328724 | 26 | 185 | 5.11451e-44 | 143.751 | cl21455    | P-loop_NTPase superfamily | -  | -       |
|          | non-specific | 197555 | 26 | 185 | 3.10799e-36 | 124.157 | smart00175 | RAB                       | -  | cl27030 |
|          | superfamily  | 331851 | 26 | 185 | 3.10799e-36 | 124.157 | cl27030    | Ras superfamily           | -  | -       |
|          | non-specific | 306559 | 27 | 184 | 3.20922e-36 | 124.153 | pfam00071  | Ras                       | -  | cl27030 |
|          | non-specific | 178655 | 26 | 182 | 2.80897e-24 | 94.6228 | PLN03108   | PLN03108                  | C  | cl27030 |
|          | specific     | 224025 | 24 | 184 | 5.83263e-17 | 75.7675 | COG1100    | Gem1                      | -  | cl27030 |
|          | non-specific | 272973 | 26 | 180 | 2.80453e-14 | 67.0117 | TIGR00231  | small_GTP                 | -  | cl27769 |
| Lche3050 | superfamily  | 332590 | 26 | 180 | 2.80453e-14 | 67.0117 | cl27769    | GTP_EFTU superfamily      | -  | -       |
|          | specific     | 206648 | 6  | 157 | 2.5916e-08  | 52.4588 | cd00882    | Ras_like_GTPase           | -  | cl21455 |
|          | superfamily  | 328724 | 6  | 157 | 2.5916e-08  | 52.4588 | cl21455    | P-loop_NTPase superfamily | -  | -       |
|          | specific     | 224025 | 5  | 129 | 1.44356e-05 | 45.3367 | COG1100    | Gem1                      | C  | cl27030 |
|          | superfamily  | 331851 | 5  | 129 | 1.44356e-05 | 45.3367 | cl27030    | Ras superfamily           | C  | -       |
|          | non-specific | 235392 | 62 | 231 | 0.00557544  | 38.1679 | PRK05291   | trmE                      | N  | cl26334 |
|          | superfamily  | 331155 | 62 | 231 | 0.00557544  | 38.1679 | cl26334    | MnmE_helical superfamily  | N  | -       |
|          | non-specific | 197554 | 65 | 109 | 0.00805517  | 36.4374 | smart00174 | RHO                       | NC | cl27030 |
|          | specific     | 206640 | 35 | 192 | 1.30368e-48 | 159.929 | cd00154    | Rab                       | -  | cl21455 |
| Lci1116  | superfamily  | 328724 | 35 | 192 | 1.30368e-48 | 159.929 | cl21455    | P-loop_NTPase superfamily | -  | -       |
|          | non-specific | 197555 | 35 | 195 | 1.15464e-46 | 155.359 | smart00175 | RAB                       | -  | cl27030 |
|          | superfamily  | 331851 | 35 | 195 | 1.15464e-46 | 155.359 | cl27030    | Ras superfamily           | -  | -       |

|          |              |        |    |     |             |         |            |                           |   |         |
|----------|--------------|--------|----|-----|-------------|---------|------------|---------------------------|---|---------|
|          | non-specific | 306559 | 36 | 195 | 9.19089e-42 | 142.257 | pfam00071  | Ras                       | - | cl27030 |
|          | non-specific | 178657 | 25 | 195 | 1.42155e-32 | 120.419 | PLN03110   | PLN03110                  | - | cl27030 |
|          | specific     | 224025 | 31 | 230 | 1.44899e-17 | 80.0047 | COG1100    | Gem1                      | - | cl27030 |
|          | non-specific | 272973 | 36 | 190 | 3.52416e-13 | 66.2413 | TIGR00231  | small_GTP                 | - | cl27769 |
| Lci1233  | superfamily  | 332590 | 36 | 190 | 3.52416e-13 | 66.2413 | cl27769    | GTP_EFTU superfamily      | - | -       |
|          | specific     | 206640 | 17 | 170 | 9.6502e-27  | 103.305 | cd00154    | Rab                       | - | cl21455 |
|          | superfamily  | 328724 | 17 | 170 | 9.6502e-27  | 103.305 | cl21455    | P-loop_NTPase superfamily | - | -       |
|          | specific     | 312094 | 18 | 129 | 8.2454e-23  | 91.4129 | pfam08477  | Roc                       | - | cl21455 |
|          | non-specific | 197555 | 17 | 170 | 1.6544e-17  | 78.3187 | smart00175 | RAB                       | - | cl27030 |
|          | superfamily  | 331851 | 17 | 170 | 1.6544e-17  | 78.3187 | cl27030    | Ras superfamily           | - | -       |
|          | specific     | 224025 | 14 | 213 | 3.23227e-17 | 79.2343 | COG1100    | Gem1                      | - | cl27030 |
|          | non-specific | 178657 | 17 | 129 | 1.95036e-11 | 62.6386 | PLN03110   | PLN03110                  | C | cl27030 |
|          | non-specific | 272973 | 17 | 168 | 1.21222e-10 | 59.3077 | TIGR00231  | small_GTP                 | - | cl27769 |
|          | superfamily  | 332590 | 17 | 168 | 1.21222e-10 | 59.3077 | cl27769    | GTP_EFTU superfamily      | - | -       |
| Ldra2229 | specific     | 206640 | 10 | 165 | 2.85985e-52 | 168.403 | cd00154    | Rab                       | - | cl21455 |
|          | superfamily  | 328724 | 10 | 165 | 2.85985e-52 | 168.403 | cl21455    | P-loop_NTPase superfamily | - | -       |
|          | non-specific | 306559 | 11 | 167 | 5.03949e-49 | 160.362 | pfam00071  | Ras                       | - | cl27030 |
|          | superfamily  | 331851 | 11 | 167 | 5.03949e-49 | 160.362 | cl27030    | Ras superfamily           | - | -       |
|          | non-specific | 197555 | 11 | 168 | 1.20896e-47 | 156.899 | smart00175 | RAB                       | - | cl27030 |
|          | non-specific | 178655 | 11 | 168 | 9.82364e-28 | 106.564 | PLN03108   | PLN03108                  | C | cl27030 |
|          | specific     | 224025 | 10 | 195 | 3.24838e-23 | 94.6423 | COG1100    | Gem1                      | - | cl27030 |
|          | non-specific | 272973 | 11 | 160 | 1.13771e-13 | 67.3969 | TIGR00231  | small_GTP                 | - | cl27769 |
|          | superfamily  | 332590 | 11 | 160 | 1.13771e-13 | 67.3969 | cl27769    | GTP_EFTU superfamily      | - | -       |
| Ldra3848 | non-specific | 206640 | 4  | 159 | 4.98555e-20 | 85.2002 | cd00154    | Rab                       | - | cl21455 |
|          | superfamily  | 328724 | 4  | 159 | 4.98555e-20 | 85.2002 | cl21455    | P-loop_NTPase superfamily | - | -       |
|          | non-specific | 312094 | 5  | 118 | 5.19987e-17 | 75.6197 | pfam08477  | Roc                       | - | cl21455 |
|          | non-specific | 197555 | 4  | 155 | 1.72712e-16 | 75.6223 | smart00175 | RAB                       | - | cl27030 |
|          | superfamily  | 331851 | 4  | 155 | 1.72712e-16 | 75.6223 | cl27030    | Ras superfamily           | - | -       |
|          | specific     | 224025 | 1  | 215 | 1.68928e-13 | 68.4487 | COG1100    | Gem1                      | - | cl27030 |
|          | non-specific | 178655 | 4  | 118 | 1.63067e-10 | 59.5696 | PLN03108   | PLN03108                  | C | cl27030 |

|            |              |        |     |     |             |         |            |                           |    |         |
|------------|--------------|--------|-----|-----|-------------|---------|------------|---------------------------|----|---------|
|            | non-specific | 272973 | 4   | 157 | 4.16998e-09 | 54.6853 | TIGR00231  | small_GTP                 | -  | cl27769 |
|            | superfamily  | 332590 | 4   | 157 | 4.16998e-09 | 54.6853 | cl27769    | GTP_EFTU superfamily      | -  | -       |
| Ldro0084   | non-specific | 206640 | 13  | 174 | 3.60661e-16 | 74.7998 | cd00154    | Rab                       | -  | cl21455 |
|            | superfamily  | 328724 | 13  | 174 | 3.60661e-16 | 74.7998 | cl21455    | P-loop_NTPase superfamily | -  | -       |
|            | non-specific | 306559 | 10  | 174 | 6.14121e-11 | 60.21   | pfam00071  | Ras                       | -  | cl27030 |
|            | superfamily  | 331851 | 10  | 174 | 6.14121e-11 | 60.21   | cl27030    | Ras superfamily           | -  | -       |
|            | specific     | 224025 | 8   | 183 | 5.61444e-10 | 58.4335 | COG1100    | Gem1                      | -  | cl27030 |
|            | non-specific | 197555 | 13  | 174 | 6.55744e-10 | 57.1327 | smart00175 | RAB                       | -  | cl27030 |
|            | non-specific | 312736 | 296 | 344 | 0.00260817  | 37.2352 | pfam09335  | SNARE_assoc               | C  | cl00429 |
|            | superfamily  | 320969 | 296 | 344 | 0.00260817  | 37.2352 | cl00429    | SNARE_assoc superfamily   | C  | -       |
|            | non-specific | 185444 | 51  | 172 | 0.0028739   | 38.1865 | PTZ00099   | PTZ00099                  | C  | cl27030 |
| Ldro2225   | specific     | 224025 | 3   | 180 | 3.76605e-10 | 58.8187 | COG1100    | Gem1                      | -  | cl27030 |
|            | superfamily  | 331851 | 3   | 180 | 3.76605e-10 | 58.8187 | cl27030    | Ras superfamily           | -  | -       |
|            | non-specific | 312094 | 5   | 115 | 4.08677e-08 | 50.5818 | pfam08477  | Roc                       | -  | cl21455 |
|            | superfamily  | 328724 | 5   | 115 | 4.08677e-08 | 50.5818 | cl21455    | P-loop_NTPase superfamily | -  | -       |
|            | non-specific | 133330 | 3   | 125 | 2.42567e-07 | 50.0936 | cd04130    | Wrch_1                    | C  | cl21455 |
|            | non-specific | 197554 | 5   | 116 | 3.57475e-05 | 43.371  | smart00174 | RHO                       | C  | cl27030 |
|            | non-specific | 272973 | 2   | 122 | 8.1312e-05  | 42.359  | TIGR00231  | small_GTP                 | C  | cl27769 |
|            | superfamily  | 332590 | 2   | 122 | 8.1312e-05  | 42.359  | cl27769    | GTP_EFTU superfamily      | C  | -       |
|            | non-specific | 237160 | 274 | 315 | 0.00527375  | 38.1933 | PRK12652   | PRK12652                  | NC | cl00807 |
|            | superfamily  | 321181 | 274 | 315 | 0.00527375  | 38.1933 | cl00807    | MNHE superfamily          | NC | -       |
| Ldro2226   | specific     | 224025 | 3   | 195 | 7.35226e-09 | 54.9667 | COG1100    | Gem1                      | -  | cl27030 |
|            | superfamily  | 331851 | 3   | 195 | 7.35226e-09 | 54.9667 | cl27030    | Ras superfamily           | -  | -       |
|            | non-specific | 312094 | 5   | 111 | 8.73942e-08 | 49.8114 | pfam08477  | Roc                       | -  | cl21455 |
|            | superfamily  | 328724 | 5   | 111 | 8.73942e-08 | 49.8114 | cl21455    | P-loop_NTPase superfamily | -  | -       |
|            | specific     | 206648 | 6   | 121 | 8.57815e-07 | 48.2216 | cd00882    | Ras_like_GTPase           | C  | cl21455 |
|            | non-specific | 197555 | 3   | 120 | 4.31262e-05 | 43.2655 | smart00175 | RAB                       | C  | cl27030 |
|            | non-specific | 237160 | 269 | 310 | 0.00358911  | 38.5785 | PRK12652   | PRK12652                  | NC | cl00807 |
|            | superfamily  | 321181 | 269 | 310 | 0.00358911  | 38.5785 | cl00807    | MNHE superfamily          | NC | -       |
| LduN230867 | non-specific | 206640 | 3   | 156 | 2.9466e-20  | 85.5854 | cd00154    | Rab                       | -  | cl21455 |

|            |              |        |    |     |             |         |            |                           |    |         |
|------------|--------------|--------|----|-----|-------------|---------|------------|---------------------------|----|---------|
|            | superfamily  | 328724 | 3  | 156 | 2.9466e-20  | 85.5854 | cl21455    | P-loop_NTPase superfamily | -  | -       |
|            | non-specific | 306559 | 4  | 151 | 8.12535e-13 | 65.2176 | pfam00071  | Ras                       | -  | cl27030 |
|            | superfamily  | 331851 | 4  | 151 | 8.12535e-13 | 65.2176 | cl27030    | Ras superfamily           | -  | -       |
|            | non-specific | 197555 | 3  | 157 | 9.03911e-13 | 65.2219 | smart00175 | RAB                       | -  | cl27030 |
|            | non-specific | 272973 | 2  | 154 | 1.11465e-11 | 62.0041 | TIGR00231  | small_GTP                 | -  | cl27769 |
|            | superfamily  | 332590 | 2  | 154 | 1.11465e-11 | 62.0041 | cl27769    | GTP_EFTU superfamily      | -  | -       |
|            | specific     | 224025 | 2  | 156 | 2.41654e-11 | 62.2855 | COG1100    | Gem1                      | -  | cl27030 |
|            | non-specific | 234624 | 70 | 157 | 1.57701e-10 | 60.8314 | PRK00089   | era                       | NC | cl26333 |
|            | superfamily  | 331154 | 70 | 157 | 1.57701e-10 | 60.8314 | cl26333    | FeoB_N superfamily        | NC | -       |
| LduN231401 | non-specific | 206640 | 14 | 167 | 1.24484e-10 | 59.0066 | cd00154    | Rab                       | -  | cl21455 |
|            | superfamily  | 328724 | 14 | 167 | 1.24484e-10 | 59.0066 | cl21455    | P-loop_NTPase superfamily | -  | -       |
|            | non-specific | 312094 | 15 | 127 | 1.32884e-06 | 46.3446 | pfam08477  | Roc                       | -  | cl21455 |
|            | non-specific | 197555 | 14 | 142 | 0.000599944 | 39.7987 | smart00175 | RAB                       | C  | cl27030 |
|            | superfamily  | 331851 | 14 | 142 | 0.000599944 | 39.7987 | cl27030    | Ras superfamily           | C  | -       |
|            | non-specific | 225138 | 6  | 175 | 0.00425231  | 37.4398 | COG2229    | Srp102                    | -  | cl21455 |
| LduN233215 | specific     | 206640 | 11 | 168 | 3.17604e-45 | 150.684 | cd00154    | Rab                       | -  | cl21455 |
|            | superfamily  | 328724 | 11 | 168 | 3.17604e-45 | 150.684 | cl21455    | P-loop_NTPase superfamily | -  | -       |
|            | non-specific | 306559 | 12 | 173 | 1.47732e-42 | 143.798 | pfam00071  | Ras                       | -  | cl27030 |
|            | superfamily  | 331851 | 12 | 173 | 1.47732e-42 | 143.798 | cl27030    | Ras superfamily           | -  | -       |
|            | non-specific | 197555 | 11 | 173 | 5.45836e-40 | 137.254 | smart00175 | RAB                       | -  | cl27030 |
|            | non-specific | 178655 | 7  | 173 | 5.42945e-31 | 115.424 | PLN03108   | PLN03108                  | C  | cl27030 |
|            | specific     | 224025 | 7  | 173 | 1.93371e-16 | 76.5379 | COG1100    | Gem1                      | C  | cl27030 |
|            | non-specific | 272973 | 11 | 162 | 4.03944e-07 | 48.9073 | TIGR00231  | small_GTP                 | -  | cl27769 |
|            | superfamily  | 332590 | 11 | 162 | 4.03944e-07 | 48.9073 | cl27769    | GTP_EFTU superfamily      | -  | -       |
| LduTex1150 | non-specific | 206640 | 14 | 167 | 1.24484e-10 | 59.0066 | cd00154    | Rab                       | -  | cl21455 |
|            | superfamily  | 328724 | 14 | 167 | 1.24484e-10 | 59.0066 | cl21455    | P-loop_NTPase superfamily | -  | -       |
|            | non-specific | 312094 | 15 | 127 | 1.32884e-06 | 46.3446 | pfam08477  | Roc                       | -  | cl21455 |
|            | non-specific | 197555 | 14 | 142 | 0.000599944 | 39.7987 | smart00175 | RAB                       | C  | cl27030 |
|            | superfamily  | 331851 | 14 | 142 | 0.000599944 | 39.7987 | cl27030    | Ras superfamily           | C  | -       |
|            | non-specific | 225138 | 6  | 175 | 0.00425231  | 37.4398 | COG2229    | Srp102                    | -  | cl21455 |

|            |              |        |    |     |             |         |            |                           |    |         |
|------------|--------------|--------|----|-----|-------------|---------|------------|---------------------------|----|---------|
| LduTex1682 | non-specific | 206640 | 3  | 156 | 2.28197e-20 | 85.9706 | cd00154    | Rab                       | -  | cl21455 |
|            | superfamily  | 328724 | 3  | 156 | 2.28197e-20 | 85.9706 | cl21455    | P-loop_NTPase superfamily | -  | -       |
|            | non-specific | 306559 | 4  | 151 | 6.87365e-13 | 65.2176 | pfam00071  | Ras                       | -  | cl27030 |
|            | superfamily  | 331851 | 4  | 151 | 6.87365e-13 | 65.2176 | cl27030    | Ras superfamily           | -  | -       |
|            | non-specific | 197555 | 3  | 157 | 7.64762e-13 | 65.2219 | smart00175 | RAB                       | -  | cl27030 |
|            | non-specific | 272973 | 2  | 154 | 7.76353e-12 | 62.3893 | TIGR00231  | small_GTP                 | -  | cl27769 |
|            | superfamily  | 332590 | 2  | 154 | 7.76353e-12 | 62.3893 | cl27769    | GTP_EFTU superfamily      | -  | -       |
|            | specific     | 224025 | 2  | 156 | 1.95753e-11 | 62.6707 | COG1100    | Gem1                      | -  | cl27030 |
|            | non-specific | 234624 | 70 | 157 | 1.33402e-10 | 60.8314 | PRK00089   | era                       | NC | cl26333 |
|            | superfamily  | 331154 | 70 | 157 | 1.33402e-10 | 60.8314 | cl26333    | FeoB_N superfamily        | NC | -       |
| LduTex3173 | specific     | 206640 | 11 | 168 | 3.17604e-45 | 150.684 | cd00154    | Rab                       | -  | cl21455 |
|            | superfamily  | 328724 | 11 | 168 | 3.17604e-45 | 150.684 | cl21455    | P-loop_NTPase superfamily | -  | -       |
|            | non-specific | 306559 | 12 | 173 | 1.47732e-42 | 143.798 | pfam00071  | Ras                       | -  | cl27030 |
|            | superfamily  | 331851 | 12 | 173 | 1.47732e-42 | 143.798 | cl27030    | Ras superfamily           | -  | -       |
|            | non-specific | 197555 | 11 | 173 | 5.45836e-40 | 137.254 | smart00175 | RAB                       | -  | cl27030 |
|            | non-specific | 178655 | 7  | 173 | 5.42945e-31 | 115.424 | PLN03108   | PLN03108                  | C  | cl27030 |
|            | specific     | 224025 | 7  | 173 | 1.93371e-16 | 76.5379 | COG1100    | Gem1                      | C  | cl27030 |
|            | non-specific | 272973 | 11 | 162 | 4.03944e-07 | 48.9073 | TIGR00231  | small_GTP                 | -  | cl27769 |
|            | superfamily  | 332590 | 11 | 162 | 4.03944e-07 | 48.9073 | cl27769    | GTP_EFTU superfamily      | -  | -       |
|            | specific     | 206648 | 12 | 144 | 1.85407e-12 | 62.0887 | cd00882    | Ras_like_GTPase           | -  | cl21455 |
| Lery0478   | superfamily  | 328724 | 12 | 144 | 1.85407e-12 | 62.0887 | cl21455    | P-loop_NTPase superfamily | -  | -       |
|            | specific     | 224025 | 11 | 167 | 9.41523e-06 | 44.5663 | COG1100    | Gem1                      | C  | cl27030 |
|            | superfamily  | 331851 | 11 | 167 | 9.41523e-06 | 44.5663 | cl27030    | Ras superfamily           | C  | -       |
|            | non-specific | 306901 | 4  | 28  | 0.00380867  | 37.1966 | pfam00503  | G-alpha                   | C  | cl26635 |
|            | superfamily  | 331456 | 4  | 28  | 0.00380867  | 37.1966 | cl26635    | G-alpha superfamily       | C  | -       |
|            | non-specific | 234624 | 45 | 139 | 0.000296455 | 41.5715 | PRK00089   | era                       | NC | cl26333 |
| Lery1116   | superfamily  | 331154 | 45 | 139 | 0.000296455 | 41.5715 | cl26333    | FeoB_N superfamily        | NC | -       |
|            | specific     | 206648 | 42 | 139 | 0.000311234 | 40.5176 | cd00882    | Ras_like_GTPase           | N  | cl21455 |
|            | superfamily  | 328724 | 42 | 139 | 0.000311234 | 40.5176 | cl21455    | P-loop_NTPase superfamily | N  | -       |
|            | non-specific | 206727 | 79 | 155 | 0.00226244  | 36.7034 | cd04164    | trmE                      | N  | cl21455 |



|            |              |        |    |     |             |         |            |                           |    |         |
|------------|--------------|--------|----|-----|-------------|---------|------------|---------------------------|----|---------|
| LFAv2_1192 | superfamily  | 328724 | 79 | 155 | 0.00226244  | 36.7034 | cl21455    | P-loop_NTPase superfamily | N  | -       |
|            | specific     | 206648 | 16 | 158 | 6.32198e-07 | 46.6808 | cd00882    | Ras_like_GTPase           | -  | cl21455 |
|            | superfamily  | 328724 | 16 | 158 | 6.32198e-07 | 46.6808 | cl21455    | P-loop_NTPase superfamily | -  | -       |
|            | non-specific | 235392 | 86 | 161 | 2.52434e-06 | 45.8719 | PRK05291   | trmE                      | N  | cl26334 |
|            | superfamily  | 331155 | 86 | 161 | 2.52434e-06 | 45.8719 | cl26334    | MnmE_helical superfamily  | N  | -       |
| LFAv2_1711 | non-specific | 315327 | 86 | 162 | 1.06541e-05 | 43.9854 | pfam12631  | MnmE_helical              | NC | cl26334 |
|            | non-specific | 223561 | 86 | 171 | 0.000347972 | 39.8506 | COG0486    | MnmE                      | N  | cl26334 |
|            | non-specific | 206640 | 4  | 165 | 2.82286e-17 | 77.8814 | cd00154    | Rab                       | -  | cl21455 |
|            | superfamily  | 328724 | 4  | 165 | 2.82286e-17 | 77.8814 | cl21455    | P-loop_NTPase superfamily | -  | -       |
|            | non-specific | 312094 | 5  | 123 | 4.03261e-15 | 70.6122 | pfam08477  | Roc                       | -  | cl21455 |
|            | specific     | 224025 | 1  | 123 | 1.28844e-12 | 66.1375 | COG1100    | Gem1                      | C  | cl27030 |
|            | superfamily  | 331851 | 1  | 123 | 1.28844e-12 | 66.1375 | cl27030    | Ras superfamily           | C  | -       |
|            | non-specific | 272973 | 3  | 163 | 8.30569e-10 | 56.9965 | TIGR00231  | small_GTP                 | -  | cl27769 |
|            | superfamily  | 332590 | 3  | 163 | 8.30569e-10 | 56.9965 | cl27769    | GTP_EFTU superfamily      | -  | -       |
|            | non-specific | 197555 | 4  | 158 | 2.25248e-09 | 55.5919 | smart00175 | RAB                       | -  | cl27030 |
| LFAv2_1897 | non-specific | 234624 | 60 | 181 | 2.10039e-07 | 51.5867 | PRK00089   | era                       | C  | cl26333 |
|            | superfamily  | 331154 | 60 | 181 | 2.10039e-07 | 51.5867 | cl26333    | FeoB_N superfamily        | C  | -       |
|            | non-specific | 306559 | 12 | 171 | 4.62424e-39 | 134.553 | pfam00071  | Ras                       | -  | cl27030 |
|            | superfamily  | 331851 | 12 | 171 | 4.62424e-39 | 134.553 | cl27030    | Ras superfamily           | -  | -       |
|            | specific     | 206640 | 11 | 168 | 2.51054e-38 | 132.58  | cd00154    | Rab                       | -  | cl21455 |
|            | superfamily  | 328724 | 11 | 168 | 2.51054e-38 | 132.58  | cl21455    | P-loop_NTPase superfamily | -  | -       |
|            | non-specific | 197555 | 11 | 171 | 1.88732e-37 | 130.321 | smart00175 | RAB                       | -  | cl27030 |
|            | non-specific | 178655 | 11 | 171 | 1.2069e-27  | 106.179 | PLN03108   | PLN03108                  | C  | cl27030 |
|            | specific     | 224025 | 9  | 133 | 3.48832e-19 | 83.8567 | COG1100    | Gem1                      | C  | cl27030 |
|            | non-specific | 272973 | 11 | 163 | 4.83719e-14 | 68.1673 | TIGR00231  | small_GTP                 | -  | cl27769 |
| LFAv2_2000 | superfamily  | 332590 | 11 | 163 | 4.83719e-14 | 68.1673 | cl27769    | GTP_EFTU superfamily      | -  | -       |
|            | specific     | 206648 | 8  | 165 | 1.5902e-06  | 47.4512 | cd00882    | Ras_like_GTPase           | -  | cl21455 |
|            | superfamily  | 328724 | 8  | 165 | 1.5902e-06  | 47.4512 | cl21455    | P-loop_NTPase superfamily | -  | -       |
|            | non-specific | 272973 | 8  | 169 | 0.000517358 | 40.0478 | TIGR00231  | small_GTP                 | -  | cl27769 |
|            | superfamily  | 332590 | 8  | 169 | 0.000517358 | 40.0478 | cl27769    | GTP_EFTU superfamily      | -  | -       |

|          |              |        |     |     |             |         |            |                           |   |         |
|----------|--------------|--------|-----|-----|-------------|---------|------------|---------------------------|---|---------|
| Lfee1335 | specific     | 206640 | 5   | 159 | 2.98368e-46 | 149.914 | cd00154    | Rab                       | - | cl21455 |
|          | superfamily  | 328724 | 5   | 159 | 2.98368e-46 | 149.914 | cl21455    | P-loop_NTPase superfamily | - | -       |
|          | non-specific | 197555 | 5   | 159 | 2.47802e-38 | 129.935 | smart00175 | RAB                       | - | cl27030 |
|          | superfamily  | 331851 | 5   | 159 | 2.47802e-38 | 129.935 | cl27030    | Ras superfamily           | - | -       |
|          | non-specific | 306559 | 5   | 156 | 7.96819e-38 | 128.39  | pfam00071  | Ras                       | - | cl27030 |
|          | specific     | 224025 | 4   | 179 | 1.32943e-23 | 93.4867 | COG1100    | Gem1                      | - | cl27030 |
|          | non-specific | 178655 | 6   | 179 | 6.77732e-22 | 88.8448 | PLN03108   | PLN03108                  | - | cl27030 |
|          | non-specific | 272973 | 5   | 161 | 8.55207e-12 | 60.4633 | TIGR00231  | small_GTP                 | - | cl27769 |
|          | superfamily  | 332590 | 5   | 161 | 8.55207e-12 | 60.4633 | cl27769    | GTP_EFTU superfamily      | - | -       |
| Lge0409  | specific     | 206648 | 10  | 157 | 0.00504032  | 37.0508 | cd00882    | Ras_like_GTPase           | - | cl21455 |
|          | superfamily  | 328724 | 10  | 157 | 0.00504032  | 37.0508 | cl21455    | P-loop_NTPase superfamily | - | -       |
| Lge0493  | specific     | 224025 | 11  | 220 | 3.76774e-15 | 72.3007 | COG1100    | Gem1                      | - | cl27030 |
|          | superfamily  | 331851 | 11  | 220 | 3.76774e-15 | 72.3007 | cl27030    | Ras superfamily           | - | -       |
|          | non-specific | 206640 | 14  | 161 | 1.43408e-13 | 66.3254 | cd00154    | Rab                       | - | cl21455 |
|          | superfamily  | 328724 | 14  | 161 | 1.43408e-13 | 66.3254 | cl21455    | P-loop_NTPase superfamily | - | -       |
|          | non-specific | 306559 | 15  | 160 | 2.85354e-12 | 62.9064 | pfam00071  | Ras                       | - | cl27030 |
|          | non-specific | 197555 | 14  | 176 | 2.56616e-10 | 57.5179 | smart00175 | RAB                       | - | cl27030 |
|          | non-specific | 272973 | 14  | 133 | 4.86532e-07 | 48.1369 | TIGR00231  | small_GTP                 | C | cl27769 |
|          | superfamily  | 332590 | 14  | 133 | 4.86532e-07 | 48.1369 | cl27769    | GTP_EFTU superfamily      | C | -       |
|          | non-specific | 178657 | 13  | 130 | 9.56858e-06 | 45.3047 | PLN03110   | PLN03110                  | C | cl27030 |
| Lge0801  | non-specific | 206640 | 705 | 858 | 1.71822e-13 | 68.6366 | cd00154    | Rab                       | - | cl21455 |
|          | superfamily  | 328724 | 705 | 858 | 1.71822e-13 | 68.6366 | cl21455    | P-loop_NTPase superfamily | - | -       |
|          | non-specific | 306559 | 705 | 858 | 1.7755e-12  | 65.988  | pfam00071  | Ras                       | - | cl27030 |
|          | superfamily  | 331851 | 705 | 858 | 1.7755e-12  | 65.988  | cl27030    | Ras superfamily           | - | -       |
|          | non-specific | 197555 | 705 | 863 | 2.44723e-10 | 59.8291 | smart00175 | RAB                       | - | cl27030 |
|          | non-specific | 272973 | 705 | 853 | 0.000247021 | 42.359  | TIGR00231  | small_GTP                 | - | cl27769 |
|          | superfamily  | 332590 | 705 | 853 | 0.000247021 | 42.359  | cl27769    | GTP_EFTU superfamily      | - | -       |
|          | specific     | 224025 | 705 | 870 | 0.000270894 | 43.0255 | COG1100    | Gem1                      | - | cl27030 |
| Lges1860 | specific     | 206640 | 60  | 224 | 1.42081e-39 | 137.202 | cd00154    | Rab                       | - | cl21455 |
|          | superfamily  | 328724 | 60  | 224 | 1.42081e-39 | 137.202 | cl21455    | P-loop_NTPase superfamily | - | -       |

|          |              |        |     |     |             |         |            |                           |   |         |
|----------|--------------|--------|-----|-----|-------------|---------|------------|---------------------------|---|---------|
|          | non-specific | 306559 | 61  | 229 | 1.56523e-34 | 124.153 | pfam00071  | Ras                       | - | cl27030 |
|          | superfamily  | 331851 | 61  | 229 | 1.56523e-34 | 124.153 | cl27030    | Ras superfamily           | - | -       |
|          | non-specific | 197555 | 60  | 229 | 1.08303e-33 | 121.846 | smart00175 | RAB                       | - | cl27030 |
|          | non-specific | 178655 | 59  | 229 | 3.78096e-22 | 92.6968 | PLN03108   | PLN03108                  | - | cl27030 |
|          | specific     | 224025 | 60  | 258 | 9.61233e-21 | 88.8643 | COG1100    | Gem1                      | - | cl27030 |
|          | non-specific | 272973 | 60  | 224 | 3.09947e-10 | 58.1521 | TIGR00231  | small_GTP                 | - | cl27769 |
|          | superfamily  | 332590 | 60  | 224 | 3.09947e-10 | 58.1521 | cl27769    | GTP_EFTU superfamily      | - | -       |
| LgoA0634 | specific     | 206640 | 7   | 159 | 3.33558e-35 | 125.261 | cd00154    | Rab                       | - | cl21455 |
|          | superfamily  | 328724 | 7   | 159 | 3.33558e-35 | 125.261 | cl21455    | P-loop_NTPase superfamily | - | -       |
|          | non-specific | 197555 | 7   | 160 | 4.386e-30   | 112.216 | smart00175 | RAB                       | - | cl27030 |
|          | superfamily  | 331851 | 7   | 160 | 4.386e-30   | 112.216 | cl27030    | Ras superfamily           | - | -       |
|          | non-specific | 306559 | 8   | 157 | 4.55964e-29 | 109.516 | pfam00071  | Ras                       | - | cl27030 |
|          | specific     | 224025 | 6   | 189 | 7.34287e-21 | 88.8643 | COG1100    | Gem1                      | - | cl27030 |
|          | non-specific | 178657 | 7   | 192 | 2.19704e-18 | 82.2838 | PLN03110   | PLN03110                  | - | cl27030 |
|          | non-specific | 272973 | 7   | 157 | 8.55316e-18 | 78.9529 | TIGR00231  | small_GTP                 | - | cl27769 |
|          | superfamily  | 332590 | 7   | 157 | 8.55316e-18 | 78.9529 | cl27769    | GTP_EFTU superfamily      | - | -       |
| LgoA0880 | specific     | 206640 | 11  | 168 | 3.37441e-50 | 163.396 | cd00154    | Rab                       | - | cl21455 |
|          | superfamily  | 328724 | 11  | 168 | 3.37441e-50 | 163.396 | cl21455    | P-loop_NTPase superfamily | - | -       |
|          | non-specific | 197555 | 11  | 172 | 9.79435e-49 | 159.596 | smart00175 | RAB                       | - | cl27030 |
|          | superfamily  | 331851 | 11  | 172 | 9.79435e-49 | 159.596 | cl27030    | Ras superfamily           | - | -       |
|          | non-specific | 306559 | 12  | 172 | 7.36868e-44 | 147.265 | pfam00071  | Ras                       | - | cl27030 |
|          | non-specific | 178657 | 5   | 176 | 1.35361e-29 | 111.944 | PLN03110   | PLN03110                  | - | cl27030 |
|          | specific     | 224025 | 7   | 187 | 6.53287e-17 | 77.6935 | COG1100    | Gem1                      | - | cl27030 |
|          | non-specific | 272973 | 11  | 164 | 1.03032e-13 | 67.3969 | TIGR00231  | small_GTP                 | - | cl27769 |
|          | superfamily  | 332590 | 11  | 164 | 1.03032e-13 | 67.3969 | cl27769    | GTP_EFTU superfamily      | - | -       |
| LgoA2567 | non-specific | 206640 | 256 | 417 | 7.12157e-23 | 94.0598 | cd00154    | Rab                       | - | cl21455 |
|          | superfamily  | 328724 | 256 | 417 | 7.12157e-23 | 94.0598 | cl21455    | P-loop_NTPase superfamily | - | -       |
|          | non-specific | 306559 | 256 | 410 | 2.73817e-21 | 89.8703 | pfam00071  | Ras                       | - | cl27030 |
|          | superfamily  | 331851 | 256 | 410 | 2.73817e-21 | 89.8703 | cl27030    | Ras superfamily           | - | -       |
|          | non-specific | 197555 | 256 | 410 | 3.12068e-18 | 81.4003 | smart00175 | RAB                       | - | cl27030 |

|          |              |        |     |     |             |         |            |                           |    |         |
|----------|--------------|--------|-----|-----|-------------|---------|------------|---------------------------|----|---------|
|          | non-specific | 240385 | 256 | 410 | 9.49401e-10 | 57.5663 | PTZ00369   | PTZ00369                  | -  | cl27030 |
|          | specific     | 315592 | 200 | 238 | 0.000393237 | 37.8473 | pfam12937  | F-box-like                | -  | cl02535 |
|          | superfamily  | 321975 | 200 | 238 | 0.000393237 | 37.8473 | cl02535    | F-box superfamily         | -  | -       |
|          | specific     | 224025 | 333 | 423 | 0.00328072  | 38.7883 | COG1100    | Gem1                      | NC | cl27030 |
|          | non-specific | 114219 | 29  | 195 | 0.0040106   | 39.3197 | pfam05483  | SCP-1                     | N  | cl25732 |
|          | superfamily  | 330553 | 29  | 195 | 0.0040106   | 39.3197 | cl25732    | SMC_N superfamily         | N  | -       |
| LgoA3158 | specific     | 206648 | 24  | 182 | 2.94601e-12 | 64.0147 | cd00882    | Ras_like_GTPase           | -  | cl21455 |
|          | superfamily  | 328724 | 24  | 182 | 2.94601e-12 | 64.0147 | cl21455    | P-loop_NTPase superfamily | -  | -       |
|          | non-specific | 307856 | 27  | 130 | 2.21302e-06 | 45.6865 | pfam01926  | MMR_HSR1                  | -  | cl21455 |
|          | specific     | 224025 | 16  | 203 | 2.0291e-05  | 44.9515 | COG1100    | Gem1                      | -  | cl27030 |
|          | superfamily  | 331851 | 16  | 203 | 2.0291e-05  | 44.9515 | cl27030    | Ras superfamily           | -  | -       |
| LgoB0626 | specific     | 206648 | 24  | 182 | 3.03285e-12 | 64.0147 | cd00882    | Ras_like_GTPase           | -  | cl21455 |
|          | superfamily  | 328724 | 24  | 182 | 3.03285e-12 | 64.0147 | cl21455    | P-loop_NTPase superfamily | -  | -       |
|          | non-specific | 307856 | 27  | 130 | 2.12873e-06 | 46.0717 | pfam01926  | MMR_HSR1                  | -  | cl21455 |
|          | specific     | 224025 | 16  | 215 | 2.39571e-05 | 44.9515 | COG1100    | Gem1                      | -  | cl27030 |
|          | superfamily  | 331851 | 16  | 215 | 2.39571e-05 | 44.9515 | cl27030    | Ras superfamily           | -  | -       |
| LgoB1531 | specific     | 206640 | 7   | 159 | 4.92455e-34 | 122.179 | cd00154    | Rab                       | -  | cl21455 |
|          | superfamily  | 328724 | 7   | 159 | 4.92455e-34 | 122.179 | cl21455    | P-loop_NTPase superfamily | -  | -       |
|          | non-specific | 197555 | 7   | 160 | 2.94149e-28 | 107.209 | smart00175 | RAB                       | -  | cl27030 |
|          | superfamily  | 331851 | 7   | 160 | 2.94149e-28 | 107.209 | cl27030    | Ras superfamily           | -  | -       |
|          | non-specific | 306559 | 8   | 157 | 3.2265e-27  | 104.508 | pfam00071  | Ras                       | -  | cl27030 |
|          | specific     | 224025 | 6   | 159 | 1.52592e-18 | 82.7011 | COG1100    | Gem1                      | -  | cl27030 |
|          | non-specific | 272973 | 7   | 157 | 1.05718e-17 | 78.9529 | TIGR00231  | small_GTP                 | -  | cl27769 |
|          | superfamily  | 332590 | 7   | 157 | 1.05718e-17 | 78.9529 | cl27769    | GTP_EFTU superfamily      | -  | -       |
|          | non-specific | 178657 | 7   | 157 | 2.11804e-17 | 79.5874 | PLN03110   | PLN03110                  | C  | cl27030 |
| LgoB2964 | non-specific | 206640 | 256 | 417 | 1.88243e-23 | 95.6006 | cd00154    | Rab                       | -  | cl21455 |
|          | superfamily  | 328724 | 256 | 417 | 1.88243e-23 | 95.6006 | cl21455    | P-loop_NTPase superfamily | -  | -       |
|          | non-specific | 306559 | 256 | 410 | 1.0447e-21  | 91.0259 | pfam00071  | Ras                       | -  | cl27030 |
|          | superfamily  | 331851 | 256 | 410 | 1.0447e-21  | 91.0259 | cl27030    | Ras superfamily           | -  | -       |
|          | non-specific | 197555 | 256 | 410 | 6.30305e-19 | 83.3263 | smart00175 | RAB                       | -  | cl27030 |

|          |              |        |     |     |             |         |            |                           |    |         |
|----------|--------------|--------|-----|-----|-------------|---------|------------|---------------------------|----|---------|
|          | non-specific | 178655 | 326 | 426 | 4.48169e-10 | 59.1844 | PLN03108   | PLN03108                  | N  | cl27030 |
|          | specific     | 315592 | 200 | 238 | 0.000438206 | 37.4621 | pfam12937  | F-box-like                | -  | cl02535 |
|          | superfamily  | 321975 | 200 | 238 | 0.000438206 | 37.4621 | cl02535    | F-box superfamily         | -  | -       |
|          | specific     | 224025 | 333 | 423 | 0.00296795  | 38.7883 | COG1100    | Gem1                      | NC | cl27030 |
|          | non-specific | 114219 | 29  | 195 | 0.00561456  | 38.9345 | pfam05483  | SCP-1                     | N  | cl25732 |
|          | superfamily  | 330553 | 29  | 195 | 0.00561456  | 38.9345 | cl25732    | SMC_N superfamily         | N  | -       |
| LgoB3164 | specific     | 206640 | 11  | 168 | 2.80846e-50 | 163.396 | cd00154    | Rab                       | -  | cl21455 |
|          | superfamily  | 328724 | 11  | 168 | 2.80846e-50 | 163.396 | cl21455    | P-loop_NTPase superfamily | -  | -       |
|          | non-specific | 197555 | 11  | 172 | 8.33111e-49 | 159.981 | smart00175 | RAB                       | -  | cl27030 |
|          | superfamily  | 331851 | 11  | 172 | 8.33111e-49 | 159.981 | cl27030    | Ras superfamily           | -  | -       |
|          | non-specific | 306559 | 12  | 172 | 6.13778e-44 | 147.265 | pfam00071  | Ras                       | -  | cl27030 |
|          | non-specific | 178657 | 5   | 176 | 1.35361e-29 | 111.944 | PLN03110   | PLN03110                  | -  | cl27030 |
|          | specific     | 224025 | 7   | 187 | 5.51049e-17 | 78.0787 | COG1100    | Gem1                      | -  | cl27030 |
|          | non-specific | 272973 | 11  | 164 | 8.78388e-14 | 67.7821 | TIGR00231  | small_GTP                 | -  | cl27769 |
|          | superfamily  | 332590 | 11  | 164 | 8.78388e-14 | 67.7821 | cl27769    | GTP_EFTU superfamily      | -  | -       |
| Lgra1130 | specific     | 206640 | 19  | 172 | 1.64258e-32 | 118.713 | cd00154    | Rab                       | -  | cl21455 |
|          | superfamily  | 328724 | 19  | 172 | 1.64258e-32 | 118.713 | cl21455    | P-loop_NTPase superfamily | -  | -       |
|          | non-specific | 197555 | 19  | 173 | 9.4543e-28  | 106.053 | smart00175 | RAB                       | -  | cl27030 |
|          | superfamily  | 331851 | 19  | 173 | 9.4543e-28  | 106.053 | cl27030    | Ras superfamily           | -  | -       |
|          | non-specific | 306559 | 20  | 172 | 3.56007e-25 | 99.1151 | pfam00071  | Ras                       | -  | cl27030 |
|          | specific     | 224025 | 16  | 215 | 1.14883e-18 | 83.0863 | COG1100    | Gem1                      | -  | cl27030 |
|          | non-specific | 178657 | 19  | 202 | 8.42855e-16 | 74.965  | PLN03110   | PLN03110                  | -  | cl27030 |
|          | non-specific | 272973 | 18  | 170 | 1.60048e-13 | 67.3969 | TIGR00231  | small_GTP                 | -  | cl27769 |
|          | superfamily  | 332590 | 18  | 170 | 1.60048e-13 | 67.3969 | cl27769    | GTP_EFTU superfamily      | -  | -       |
| Lgra2032 | specific     | 206640 | 11  | 168 | 1.32871e-50 | 164.551 | cd00154    | Rab                       | -  | cl21455 |
|          | superfamily  | 328724 | 11  | 168 | 1.32871e-50 | 164.551 | cl21455    | P-loop_NTPase superfamily | -  | -       |
|          | non-specific | 197555 | 11  | 171 | 5.4505e-49  | 160.366 | smart00175 | RAB                       | -  | cl27030 |
|          | superfamily  | 331851 | 11  | 171 | 5.4505e-49  | 160.366 | cl27030    | Ras superfamily           | -  | -       |
|          | non-specific | 306559 | 12  | 171 | 7.24343e-47 | 154.969 | pfam00071  | Ras                       | -  | cl27030 |
|          | non-specific | 178657 | 1   | 171 | 3.16594e-33 | 121.574 | PLN03110   | PLN03110                  | -  | cl27030 |

|          |              |        |     |     |             |         |            |                           |   |         |
|----------|--------------|--------|-----|-----|-------------|---------|------------|---------------------------|---|---------|
| Lgra2891 | specific     | 224025 | 7   | 201 | 2.48161e-21 | 90.0199 | COG1100    | Gem1                      | - | cl27030 |
|          | non-specific | 272973 | 11  | 166 | 7.41358e-14 | 67.7821 | TIGR00231  | small_GTP                 | - | cl27769 |
|          | superfamily  | 332590 | 11  | 166 | 7.41358e-14 | 67.7821 | cl27769    | GTP_EFTU superfamily      | - | -       |
|          | specific     | 206640 | 47  | 185 | 9.34987e-32 | 115.631 | cd00154    | Rab                       | - | cl21455 |
|          | superfamily  | 328724 | 47  | 185 | 9.34987e-32 | 115.631 | cl21455    | P-loop_NTPase superfamily | - | -       |
|          | non-specific | 197555 | 47  | 188 | 4.03607e-27 | 103.357 | smart00175 | RAB                       | - | cl27030 |
|          | superfamily  | 331851 | 47  | 188 | 4.03607e-27 | 103.357 | cl27030    | Ras superfamily           | - | -       |
|          | non-specific | 306559 | 47  | 188 | 1.28147e-25 | 99.5003 | pfam00071  | Ras                       | - | cl27030 |
|          | non-specific | 178655 | 47  | 195 | 1.12823e-14 | 71.1256 | PLN03108   | PLN03108                  | - | cl27030 |
| Lgra3435 | specific     | 224025 | 46  | 197 | 1.049e-07   | 51.4999 | COG1100    | Gem1                      | - | cl27030 |
|          | specific     | 206640 | 74  | 228 | 1.75005e-27 | 104.075 | cd00154    | Rab                       | - | cl21455 |
|          | superfamily  | 328724 | 74  | 228 | 1.75005e-27 | 104.075 | cl21455    | P-loop_NTPase superfamily | - | -       |
|          | non-specific | 306559 | 75  | 233 | 1.48355e-21 | 88.7148 | pfam00071  | Ras                       | - | cl27030 |
|          | superfamily  | 331851 | 75  | 233 | 1.48355e-21 | 88.7148 | cl27030    | Ras superfamily           | - | -       |
|          | non-specific | 197555 | 74  | 234 | 2.84789e-20 | 85.2523 | smart00175 | RAB                       | - | cl27030 |
|          | non-specific | 215587 | 66  | 244 | 2.92035e-14 | 70.0843 | PLN03118   | PLN03118                  | - | cl27030 |
|          | specific     | 224025 | 74  | 263 | 5.80737e-10 | 58.0483 | COG1100    | Gem1                      | - | cl27030 |
|          | non-specific | 272973 | 74  | 225 | 3.54133e-05 | 43.1294 | TIGR00231  | small_GTP                 | - | cl27769 |
| Lgra3465 | superfamily  | 332590 | 74  | 225 | 3.54133e-05 | 43.1294 | cl27769    | GTP_EFTU superfamily      | - | -       |
|          | non-specific | 197554 | 600 | 765 | 9.39258e-61 | 202.458 | smart00174 | RHO                       | - | cl27030 |
|          | superfamily  | 331851 | 600 | 765 | 9.39258e-61 | 202.458 | cl27030    | Ras superfamily           | - | -       |
|          | specific     | 206641 | 598 | 764 | 1.03186e-60 | 202.004 | cd00157    | Rho                       | - | cl21455 |
|          | superfamily  | 328724 | 598 | 764 | 1.03186e-60 | 202.004 | cl21455    | P-loop_NTPase superfamily | - | -       |
|          | non-specific | 306559 | 598 | 765 | 1.53586e-45 | 159.977 | pfam00071  | Ras                       | - | cl27030 |
|          | specific     | 224025 | 597 | 771 | 1.04995e-30 | 120.065 | COG1100    | Gem1                      | - | cl27030 |
|          | non-specific | 272973 | 597 | 713 | 1.96385e-17 | 80.1085 | TIGR00231  | small_GTP                 | C | cl27769 |
|          | superfamily  | 332590 | 597 | 713 | 1.96385e-17 | 80.1085 | cl27769    | GTP_EFTU superfamily      | C | -       |
|          | non-specific | 178657 | 598 | 758 | 4.07364e-17 | 80.743  | PLN03110   | PLN03110                  | C | cl27030 |
|          | non-specific | 319568 | 131 | 207 | 2.66464e-09 | 53.7883 | cd16654    | RING-Ubox_CHIP            | - | cl17238 |
|          | superfamily  | 327409 | 131 | 207 | 2.66464e-09 | 53.7883 | cl17238    | RING_Ubox superfamily     | - | -       |
|          |              |        |     |     |             |         |            |                           |   |         |

|            |              |        |     |     |             |         |            |                           |   |         |
|------------|--------------|--------|-----|-----|-------------|---------|------------|---------------------------|---|---------|
|            | non-specific | 319568 | 218 | 276 | 8.7909e-06  | 43.7731 | cd16654    | RING-Ubox_CHIP            | - | cl17238 |
|            | superfamily  | 327409 | 218 | 276 | 8.7909e-06  | 43.7731 | cl17238    | RING_Ubox superfamily     | - | -       |
|            | non-specific | 128780 | 133 | 207 | 0.000133855 | 40.2961 | smart00504 | Ubox                      | - | cl17238 |
|            | non-specific | 128780 | 229 | 272 | 0.000208327 | 39.9109 | smart00504 | Ubox                      | - | cl17238 |
|            | non-specific | 252675 | 153 | 213 | 0.00231891  | 37.2904 | pfam04564  | U-box                     | - | cl17238 |
|            | non-specific | 252675 | 220 | 275 | 0.00234181  | 37.2904 | pfam04564  | U-box                     | - | cl17238 |
| Lgra3555   | non-specific | 206641 | 2   | 163 | 2.45935e-42 | 142.683 | cd00157    | Rho                       | - | cl21455 |
|            | superfamily  | 328724 | 2   | 163 | 2.45935e-42 | 142.683 | cl21455    | P-loop_NTPase superfamily | - | -       |
|            | non-specific | 197554 | 3   | 167 | 2.1343e-41  | 140.441 | smart00174 | RHO                       | - | cl27030 |
|            | superfamily  | 331851 | 3   | 167 | 2.1343e-41  | 140.441 | cl27030    | Ras superfamily           | - | -       |
|            | non-specific | 306559 | 2   | 164 | 1.08335e-37 | 130.316 | pfam00071  | Ras                       | - | cl27030 |
|            | non-specific | 272973 | 1   | 159 | 2.66521e-21 | 87.8125 | TIGR00231  | small_GTP                 | - | cl27769 |
|            | superfamily  | 332590 | 1   | 159 | 2.66521e-21 | 87.8125 | cl27769    | GTP_EFTU superfamily      | - | -       |
|            | specific     | 224025 | 1   | 195 | 2.56785e-18 | 81.1603 | COG1100    | Gem1                      | - | cl27030 |
|            | non-specific | 215587 | 2   | 159 | 4.17716e-17 | 77.7883 | PLN03118   | PLN03118                  | - | cl27030 |
| Lgre1002   | non-specific | 206640 | 10  | 168 | 1.53775e-12 | 64.7846 | cd00154    | Rab                       | - | cl21455 |
|            | superfamily  | 328724 | 10  | 168 | 1.53775e-12 | 64.7846 | cl21455    | P-loop_NTPase superfamily | - | -       |
|            | non-specific | 312094 | 11  | 133 | 7.51197e-11 | 58.671  | pfam08477  | Roc                       | - | cl21455 |
|            | non-specific | 197555 | 10  | 188 | 2.90886e-06 | 46.7323 | smart00175 | RAB                       | - | cl27030 |
|            | superfamily  | 331851 | 10  | 188 | 2.90886e-06 | 46.7323 | cl27030    | Ras superfamily           | - | -       |
|            | non-specific | 272973 | 9   | 157 | 7.56816e-06 | 45.4405 | TIGR00231  | small_GTP                 | - | cl27769 |
|            | superfamily  | 332590 | 9   | 157 | 7.56816e-06 | 45.4405 | cl27769    | GTP_EFTU superfamily      | - | -       |
|            | specific     | 224025 | 5   | 220 | 2.02351e-05 | 45.3367 | COG1100    | Gem1                      | - | cl27030 |
| LHAV2_0998 | non-specific | 206640 | 33  | 179 | 1.37446e-17 | 78.6518 | cd00154    | Rab                       | - | cl21455 |
|            | superfamily  | 328724 | 33  | 179 | 1.37446e-17 | 78.6518 | cl21455    | P-loop_NTPase superfamily | - | -       |
|            | non-specific | 312094 | 34  | 138 | 2.08161e-13 | 65.6046 | pfam08477  | Roc                       | - | cl21455 |
|            | non-specific | 197555 | 33  | 178 | 2.49905e-13 | 66.7627 | smart00175 | RAB                       | - | cl27030 |
|            | superfamily  | 331851 | 33  | 178 | 2.49905e-13 | 66.7627 | cl27030    | Ras superfamily           | - | -       |
|            | specific     | 224025 | 28  | 201 | 9.4958e-12  | 63.8263 | COG1100    | Gem1                      | - | cl27030 |
|            | non-specific | 272973 | 33  | 179 | 1.05457e-07 | 50.8333 | TIGR00231  | small_GTP                 | - | cl27769 |

|            |              |        |     |     |             |         |            |                           |    |         |
|------------|--------------|--------|-----|-----|-------------|---------|------------|---------------------------|----|---------|
| LHAV2_1310 | superfamily  | 332590 | 33  | 179 | 1.05457e-07 | 50.8333 | cl27769    | GTP_EFTU superfamily      | -  | -       |
|            | non-specific | 234624 | 96  | 185 | 2.36381e-07 | 51.2015 | PRK00089   | era                       | NC | cl26333 |
|            | superfamily  | 331154 | 96  | 185 | 2.36381e-07 | 51.2015 | cl26333    | FeoB_N superfamily        | NC | -       |
|            | non-specific | 312094 | 5   | 117 | 1.42795e-06 | 46.3446 | pfam08477  | Roc                       | -  | cl21455 |
|            | superfamily  | 328724 | 5   | 117 | 1.42795e-06 | 46.3446 | cl21455    | P-loop_NTPase superfamily | -  | -       |
|            | non-specific | 206736 | 5   | 191 | 3.11204e-05 | 44.6307 | cd04173    | Rnd2_Rho7                 | -  | cl21455 |
|            | specific     | 224025 | 1   | 210 | 0.000671423 | 40.3291 | COG1100    | Gem1                      | -  | cl27030 |
|            | superfamily  | 331851 | 1   | 210 | 0.000671423 | 40.3291 | cl27030    | Ras superfamily           | -  | -       |
|            | non-specific | 311978 | 123 | 235 | 0.00124527  | 39.9053 | pfam08317  | Spc7                      | NC | cl25508 |
|            | superfamily  | 330329 | 123 | 235 | 0.00124527  | 39.9053 | cl25508    | Spc7 superfamily          | NC | -       |
| LHAV2_2690 | non-specific | 215587 | 4   | 118 | 0.00164752  | 39.2683 | PLN03118   | PLN03118                  | C  | cl27030 |
|            | specific     | 312094 | 4   | 116 | 1.53288e-23 | 92.9537 | pfam08477  | Roc                       | -  | cl21455 |
|            | superfamily  | 328724 | 4   | 116 | 1.53288e-23 | 92.9537 | cl21455    | P-loop_NTPase superfamily | -  | -       |
|            | non-specific | 206640 | 3   | 151 | 2.07399e-20 | 85.9706 | cd00154    | Rab                       | -  | cl21455 |
|            | non-specific | 197555 | 3   | 117 | 3.85295e-18 | 79.8595 | smart00175 | RAB                       | C  | cl27030 |
|            | superfamily  | 331851 | 3   | 117 | 3.85295e-18 | 79.8595 | cl27030    | Ras superfamily           | C  | -       |
|            | specific     | 224025 | 3   | 130 | 1.17293e-17 | 80.0047 | COG1100    | Gem1                      | C  | cl27030 |
|            | non-specific | 272973 | 2   | 117 | 4.92672e-11 | 60.0781 | TIGR00231  | small_GTP                 | C  | cl27769 |
|            | superfamily  | 332590 | 2   | 117 | 4.92672e-11 | 60.0781 | cl27769    | GTP_EFTU superfamily      | C  | -       |
|            | non-specific | 178655 | 4   | 127 | 7.42882e-10 | 57.6436 | PLN03108   | PLN03108                  | C  | cl27030 |
| LHAV2_2691 | non-specific | 312094 | 4   | 56  | 2.47471e-08 | 45.5742 | pfam08477  | Roc                       | C  | cl21455 |
|            | superfamily  | 328724 | 4   | 56  | 2.47471e-08 | 45.5742 | cl21455    | P-loop_NTPase superfamily | C  | -       |
|            | non-specific | 206694 | 3   | 56  | 5.6277e-08  | 45.9435 | cd04109    | Rab28                     | C  | cl21455 |
|            | non-specific | 197555 | 3   | 56  | 1.19504e-05 | 39.4135 | smart00175 | RAB                       | C  | cl27030 |
|            | superfamily  | 331851 | 3   | 56  | 1.19504e-05 | 39.4135 | cl27030    | Ras superfamily           | C  | -       |
|            | specific     | 224025 | 2   | 56  | 4.88905e-05 | 38.0179 | COG1100    | Gem1                      | C  | cl27030 |
| LHAV2_2693 | non-specific | 206640 | 3   | 152 | 1.35544e-21 | 89.0522 | cd00154    | Rab                       | -  | cl21455 |
|            | superfamily  | 328724 | 3   | 152 | 1.35544e-21 | 89.0522 | cl21455    | P-loop_NTPase superfamily | -  | -       |
|            | non-specific | 312094 | 4   | 117 | 9.15186e-21 | 85.6349 | pfam08477  | Roc                       | -  | cl21455 |
|            | non-specific | 197555 | 3   | 118 | 8.59331e-19 | 81.7855 | smart00175 | RAB                       | C  | cl27030 |



|         |              |        |     |     |             |         |            |                           |    |         |
|---------|--------------|--------|-----|-----|-------------|---------|------------|---------------------------|----|---------|
|         | superfamily  | 331851 | 3   | 118 | 8.59331e-19 | 81.7855 | cl27030    | Ras superfamily           | C  | -       |
|         | specific     | 224025 | 3   | 131 | 2.49361e-15 | 73.4563 | COG1100    | Gem1                      | C  | cl27030 |
|         | non-specific | 178657 | 4   | 178 | 3.32038e-07 | 49.9271 | PLN03110   | PLN03110                  | C  | cl27030 |
|         | non-specific | 272973 | 2   | 118 | 2.58507e-06 | 46.5961 | TIGR00231  | small_GTP                 | C  | cl27769 |
|         | superfamily  | 332590 | 2   | 118 | 2.58507e-06 | 46.5961 | cl27769    | GTP_EFTU superfamily      | C  | -       |
| Lim1229 | specific     | 206648 | 28  | 176 | 7.90757e-12 | 62.4739 | cd00882    | Ras_like_GTPase           | -  | cl21455 |
|         | superfamily  | 328724 | 28  | 176 | 7.90757e-12 | 62.4739 | cl21455    | P-loop_NTPase superfamily | -  | -       |
|         | specific     | 224025 | 28  | 170 | 2.1947e-10  | 59.5891 | COG1100    | Gem1                      | C  | cl27030 |
|         | superfamily  | 331851 | 28  | 170 | 2.1947e-10  | 59.5891 | cl27030    | Ras superfamily           | C  | -       |
|         | non-specific | 197555 | 28  | 176 | 6.41078e-09 | 54.4363 | smart00175 | RAB                       | -  | cl27030 |
|         | non-specific | 272973 | 28  | 178 | 1.15807e-07 | 50.8333 | TIGR00231  | small_GTP                 | -  | cl27769 |
|         | superfamily  | 332590 | 28  | 178 | 1.15807e-07 | 50.8333 | cl27769    | GTP_EFTU superfamily      | -  | -       |
|         | non-specific | 306559 | 36  | 176 | 8.79394e-07 | 48.2688 | pfam00071  | Ras                       | -  | cl27030 |
|         | non-specific | 235392 | 91  | 187 | 1.14972e-05 | 46.6423 | PRK05291   | trmE                      | N  | cl26334 |
|         | superfamily  | 331155 | 91  | 187 | 1.14972e-05 | 46.6423 | cl26334    | MnmE_helical superfamily  | N  | -       |
|         | non-specific | 226515 | 193 | 290 | 0.00341342  | 38.6908 | COG4028    | COG4028                   | NC | cl18759 |
|         | superfamily  | 226515 | 193 | 290 | 0.00341342  | 38.6908 | cl18759    | COG4028 superfamily       | NC | -       |
| Lja0129 | specific     | 312094 | 4   | 114 | 4.53016e-25 | 96.8057 | pfam08477  | Roc                       | -  | cl21455 |
|         | superfamily  | 328724 | 4   | 114 | 4.53016e-25 | 96.8057 | cl21455    | P-loop_NTPase superfamily | -  | -       |
|         | non-specific | 206640 | 3   | 149 | 1.08941e-22 | 91.7486 | cd00154    | Rab                       | -  | cl21455 |
|         | non-specific | 197555 | 3   | 145 | 3.21894e-20 | 85.2523 | smart00175 | RAB                       | -  | cl27030 |
|         | superfamily  | 331851 | 3   | 145 | 3.21894e-20 | 85.2523 | cl27030    | Ras superfamily           | -  | -       |
|         | specific     | 224025 | 3   | 114 | 6.88471e-15 | 72.3007 | COG1100    | Gem1                      | C  | cl27030 |
|         | non-specific | 178657 | 2   | 135 | 3.90572e-08 | 52.6235 | PLN03110   | PLN03110                  | C  | cl27030 |
|         | non-specific | 272973 | 4   | 114 | 7.16428e-08 | 50.8333 | TIGR00231  | small_GTP                 | C  | cl27769 |
|         | superfamily  | 332590 | 4   | 114 | 7.16428e-08 | 50.8333 | cl27769    | GTP_EFTU superfamily      | C  | -       |
| Lja2306 | non-specific | 206640 | 4   | 156 | 1.45168e-24 | 97.1414 | cd00154    | Rab                       | -  | cl21455 |
|         | superfamily  | 328724 | 4   | 156 | 1.45168e-24 | 97.1414 | cl21455    | P-loop_NTPase superfamily | -  | -       |
|         | non-specific | 197555 | 4   | 157 | 8.85908e-19 | 81.7855 | smart00175 | RAB                       | -  | cl27030 |
|         | superfamily  | 331851 | 4   | 157 | 8.85908e-19 | 81.7855 | cl27030    | Ras superfamily           | -  | -       |

|          |              |        |     |     |             |         |            |                           |   |         |
|----------|--------------|--------|-----|-----|-------------|---------|------------|---------------------------|---|---------|
|          | non-specific | 312094 | 5   | 112 | 5.67607e-18 | 77.9309 | pfam08477  | Roc                       | - | cl21455 |
|          | specific     | 224025 | 1   | 150 | 1.97486e-14 | 71.1451 | COG1100    | Gem1                      | C | cl27030 |
|          | non-specific | 272973 | 4   | 159 | 2.24674e-09 | 55.4557 | TIGR00231  | small_GTP                 | - | cl27769 |
|          | superfamily  | 332590 | 4   | 159 | 2.24674e-09 | 55.4557 | cl27769    | GTP_EFTU superfamily      | - | -       |
|          | non-specific | 178655 | 4   | 151 | 3.06414e-07 | 49.9396 | PLN03108   | PLN03108                  | - | cl27030 |
| Lja2501  | non-specific | 312094 | 5   | 119 | 3.19889e-09 | 54.0486 | pfam08477  | Roc                       | - | cl21455 |
|          | superfamily  | 328724 | 5   | 119 | 3.19889e-09 | 54.0486 | cl21455    | P-loop_NTPase superfamily | - | -       |
|          | non-specific | 206741 | 5   | 164 | 3.26345e-09 | 55.0347 | cd09914    | RocCOR                    | - | cl21455 |
|          | specific     | 224025 | 1   | 149 | 1.03924e-07 | 51.8851 | COG1100    | Gem1                      | C | cl27030 |
|          | superfamily  | 331851 | 1   | 149 | 1.03924e-07 | 51.8851 | cl27030    | Ras superfamily           | C | -       |
|          | non-specific | 197555 | 4   | 115 | 4.36269e-07 | 49.0435 | smart00175 | RAB                       | C | cl27030 |
|          | non-specific | 178657 | 3   | 137 | 0.00265697  | 38.7563 | PLN03110   | PLN03110                  | C | cl27030 |
| Lja2537  | specific     | 206640 | 224 | 381 | 3.05919e-29 | 111.009 | cd00154    | Rab                       | - | cl21455 |
|          | superfamily  | 328724 | 224 | 381 | 3.05919e-29 | 111.009 | cl21455    | P-loop_NTPase superfamily | - | -       |
|          | non-specific | 306559 | 226 | 374 | 1.62785e-27 | 106.434 | pfam00071  | Ras                       | - | cl27030 |
|          | superfamily  | 331851 | 226 | 374 | 1.62785e-27 | 106.434 | cl27030    | Ras superfamily           | - | -       |
|          | non-specific | 197555 | 226 | 381 | 9.93336e-24 | 96.423  | smart00175 | RAB                       | - | cl27030 |
|          | non-specific | 240385 | 275 | 396 | 1.33472e-10 | 59.8775 | PTZ00369   | PTZ00369                  | N | cl27030 |
|          | specific     | 224025 | 220 | 381 | 1.50186e-05 | 45.7219 | COG1100    | Gem1                      | - | cl27030 |
|          | non-specific | 272973 | 224 | 379 | 0.000138263 | 41.9738 | TIGR00231  | small_GTP                 | - | cl27769 |
|          | superfamily  | 332590 | 224 | 379 | 0.000138263 | 41.9738 | cl27769    | GTP_EFTU superfamily      | - | -       |
| Ljor1196 | specific     | 206648 | 23  | 178 | 2.43274e-09 | 55.5404 | cd00882    | Ras_like_GTPase           | - | cl21455 |
|          | superfamily  | 328724 | 23  | 178 | 2.43274e-09 | 55.5404 | cl21455    | P-loop_NTPase superfamily | - | -       |
|          | non-specific | 312094 | 22  | 138 | 3.28183e-07 | 47.8854 | pfam08477  | Roc                       | - | cl21455 |
|          | specific     | 224025 | 18  | 179 | 7.98308e-06 | 46.1071 | COG1100    | Gem1                      | C | cl27030 |
|          | superfamily  | 331851 | 18  | 179 | 7.98308e-06 | 46.1071 | cl27030    | Ras superfamily           | C | -       |
|          | non-specific | 235392 | 94  | 179 | 2.33533e-05 | 45.4867 | PRK05291   | trmE                      | N | cl26334 |
|          | superfamily  | 331155 | 94  | 179 | 2.33533e-05 | 45.4867 | cl26334    | MnmE_helical superfamily  | N | -       |
|          | non-specific | 197555 | 22  | 147 | 0.00862969  | 36.3319 | smart00175 | RAB                       | C | cl27030 |
| Ljor2281 | non-specific | 206640 | 3   | 150 | 9.90944e-24 | 94.8302 | cd00154    | Rab                       | - | cl21455 |

|          |              |        |    |     |             |         |            |                           |    |         |
|----------|--------------|--------|----|-----|-------------|---------|------------|---------------------------|----|---------|
|          | superfamily  | 328724 | 3  | 150 | 9.90944e-24 | 94.8302 | cl21455    | P-loop_NTPase superfamily | -  | -       |
|          | non-specific | 197555 | 3  | 159 | 2.20235e-17 | 77.5483 | smart00175 | RAB                       | -  | cl27030 |
|          | superfamily  | 331851 | 3  | 159 | 2.20235e-17 | 77.5483 | cl27030    | Ras superfamily           | -  | -       |
|          | non-specific | 306559 | 4  | 150 | 8.85048e-16 | 73.3068 | pfam00071  | Ras                       | -  | cl27030 |
|          | specific     | 224025 | 2  | 182 | 1.11793e-13 | 68.8339 | COG1100    | Gem1                      | -  | cl27030 |
|          | non-specific | 178655 | 2  | 226 | 7.05166e-09 | 54.9472 | PLN03108   | PLN03108                  | -  | cl27030 |
|          | non-specific | 272973 | 2  | 151 | 8.62333e-06 | 45.0553 | TIGR00231  | small_GTP                 | -  | cl27769 |
|          | superfamily  | 332590 | 2  | 151 | 8.62333e-06 | 45.0553 | cl27769    | GTP_EFTU superfamily      | -  | -       |
| Ljor2282 | non-specific | 206640 | 7  | 152 | 3.09448e-20 | 85.2002 | cd00154    | Rab                       | -  | cl21455 |
|          | superfamily  | 328724 | 7  | 152 | 3.09448e-20 | 85.2002 | cl21455    | P-loop_NTPase superfamily | -  | -       |
|          | non-specific | 312094 | 8  | 118 | 2.00835e-18 | 79.0865 | pfam08477  | Roc                       | -  | cl21455 |
|          | specific     | 224025 | 6  | 118 | 4.13827e-16 | 75.7675 | COG1100    | Gem1                      | C  | cl27030 |
|          | superfamily  | 331851 | 6  | 118 | 4.13827e-16 | 75.7675 | cl27030    | Ras superfamily           | C  | -       |
|          | non-specific | 197555 | 7  | 152 | 1.19941e-14 | 70.2295 | smart00175 | RAB                       | -  | cl27030 |
|          | non-specific | 272973 | 8  | 87  | 6.47443e-08 | 51.2185 | TIGR00231  | small_GTP                 | C  | cl27769 |
|          | superfamily  | 332590 | 8  | 87  | 6.47443e-08 | 51.2185 | cl27769    | GTP_EFTU superfamily      | C  | -       |
|          | non-specific | 215587 | 7  | 121 | 2.16352e-05 | 44.6611 | PLN03118   | PLN03118                  | C  | cl27030 |
| Ljor2501 | specific     | 224025 | 3  | 165 | 1.72146e-13 | 68.4487 | COG1100    | Gem1                      | C  | cl27030 |
|          | superfamily  | 331851 | 3  | 165 | 1.72146e-13 | 68.4487 | cl27030    | Ras superfamily           | C  | -       |
|          | non-specific | 206653 | 3  | 137 | 5.58032e-11 | 60.258  | cd01860    | Rab5_related              | C  | cl21455 |
|          | superfamily  | 328724 | 3  | 137 | 5.58032e-11 | 60.258  | cl21455    | P-loop_NTPase superfamily | C  | -       |
|          | non-specific | 306559 | 3  | 139 | 7.01933e-10 | 56.7432 | pfam00071  | Ras                       | C  | cl27030 |
|          | non-specific | 197555 | 3  | 160 | 2.79055e-07 | 49.4287 | smart00175 | RAB                       | -  | cl27030 |
|          | non-specific | 185444 | 63 | 149 | 2.01283e-05 | 44.3497 | PTZ00099   | PTZ00099                  | C  | cl27030 |
|          | non-specific | 272973 | 61 | 134 | 0.00244733  | 37.7366 | TIGR00231  | small_GTP                 | NC | cl27769 |
|          | superfamily  | 332590 | 61 | 134 | 0.00244733  | 37.7366 | cl27769    | GTP_EFTU superfamily      | NC | -       |
| Ljor2641 | non-specific | 206640 | 18 | 174 | 7.91217e-16 | 73.6442 | cd00154    | Rab                       | -  | cl21455 |
|          | superfamily  | 328724 | 18 | 174 | 7.91217e-16 | 73.6442 | cl21455    | P-loop_NTPase superfamily | -  | -       |
|          | specific     | 224025 | 12 | 187 | 1.0558e-11  | 63.4411 | COG1100    | Gem1                      | -  | cl27030 |
|          | superfamily  | 331851 | 12 | 187 | 1.0558e-11  | 63.4411 | cl27030    | Ras superfamily           | -  | -       |

|              |              |        |     |     |             |         |            |                           |   |         |
|--------------|--------------|--------|-----|-----|-------------|---------|------------|---------------------------|---|---------|
|              | non-specific | 306559 | 18  | 133 | 4.56674e-11 | 60.21   | pfam00071  | Ras                       | C | cl27030 |
|              | non-specific | 197555 | 18  | 130 | 4.91379e-10 | 57.5179 | smart00175 | RAB                       | C | cl27030 |
|              | non-specific | 272973 | 18  | 171 | 8.91204e-08 | 50.8333 | TIGR00231  | small_GTP                 | - | cl27769 |
|              | superfamily  | 332590 | 18  | 171 | 8.91204e-08 | 50.8333 | cl27769    | GTP_EFTU superfamily      | - | -       |
|              | non-specific | 178655 | 18  | 130 | 0.000147986 | 42.2356 | PLN03108   | PLN03108                  | C | cl27030 |
| Llan0853     | non-specific | 206640 | 3   | 189 | 3.67618e-24 | 97.1414 | cd00154    | Rab                       | - | cl21455 |
|              | superfamily  | 328724 | 3   | 189 | 3.67618e-24 | 97.1414 | cl21455    | P-loop_NTPase superfamily | - | -       |
|              | non-specific | 312094 | 4   | 125 | 3.67445e-21 | 87.5609 | pfam08477  | Roc                       | - | cl21455 |
|              | non-specific | 197555 | 3   | 189 | 5.6179e-20  | 85.6375 | smart00175 | RAB                       | - | cl27030 |
|              | superfamily  | 331851 | 3   | 189 | 5.6179e-20  | 85.6375 | cl27030    | Ras superfamily           | - | -       |
|              | specific     | 224025 | 2   | 218 | 1.19559e-19 | 86.5531 | COG1100    | Gem1                      | - | cl27030 |
|              | non-specific | 178655 | 2   | 139 | 1.39352e-13 | 68.8144 | PLN03108   | PLN03108                  | C | cl27030 |
|              | non-specific | 272973 | 2   | 127 | 1.19291e-08 | 53.5297 | TIGR00231  | small_GTP                 | C | cl27769 |
|              | superfamily  | 332590 | 2   | 127 | 1.19291e-08 | 53.5297 | cl27769    | GTP_EFTU superfamily      | C | -       |
|              | non-specific | 310337 | 287 | 354 | 0.00642102  | 37.8363 | pfam05661  | DUF808                    | N | cl01002 |
|              | superfamily  | 321298 | 287 | 354 | 0.00642102  | 37.8363 | cl01002    | DUF808 superfamily        | N | -       |
| Llan0913     | non-specific | 206640 | 4   | 160 | 4.72668e-13 | 66.3254 | cd00154    | Rab                       | - | cl21455 |
|              | superfamily  | 328724 | 4   | 160 | 4.72668e-13 | 66.3254 | cl21455    | P-loop_NTPase superfamily | - | -       |
|              | non-specific | 312094 | 5   | 116 | 5.88423e-12 | 61.7526 | pfam08477  | Roc                       | - | cl21455 |
|              | specific     | 224025 | 1   | 129 | 2.97296e-10 | 59.5891 | COG1100    | Gem1                      | C | cl27030 |
|              | superfamily  | 331851 | 1   | 129 | 2.97296e-10 | 59.5891 | cl27030    | Ras superfamily           | C | -       |
|              | non-specific | 197555 | 4   | 165 | 5.70385e-08 | 51.7399 | smart00175 | RAB                       | - | cl27030 |
|              | non-specific | 178655 | 5   | 159 | 7.43901e-05 | 43.3912 | PLN03108   | PLN03108                  | C | cl27030 |
| Llikebru0111 | specific     | 206648 | 6   | 168 | 1.08111e-12 | 65.1703 | cd00882    | Ras_like_GTPase           | - | cl21455 |
|              | superfamily  | 328724 | 6   | 168 | 1.08111e-12 | 65.1703 | cl21455    | P-loop_NTPase superfamily | - | -       |
|              | non-specific | 306559 | 5   | 163 | 4.00799e-09 | 54.8172 | pfam00071  | Ras                       | - | cl27030 |
|              | superfamily  | 331851 | 5   | 163 | 4.00799e-09 | 54.8172 | cl27030    | Ras superfamily           | - | -       |
|              | non-specific | 197555 | 5   | 163 | 1.07174e-07 | 50.9695 | smart00175 | RAB                       | - | cl27030 |
|              | non-specific | 235392 | 89  | 168 | 0.000111071 | 43.5607 | PRK05291   | trmE                      | N | cl26334 |
|              | superfamily  | 331155 | 89  | 168 | 0.000111071 | 43.5607 | cl26334    | MnmE_helical superfamily  | N | -       |

|              |              |        |    |     |             |         |            |                           |   |         |
|--------------|--------------|--------|----|-----|-------------|---------|------------|---------------------------|---|---------|
| Llikebru1058 | specific     | 224025 | 5  | 133 | 0.000154469 | 42.2551 | COG1100    | Gem1                      | C | cl27030 |
|              | non-specific | 272973 | 4  | 168 | 0.000502257 | 40.0478 | TIGR00231  | small_GTP                 | - | cl27769 |
|              | superfamily  | 332590 | 4  | 168 | 0.000502257 | 40.0478 | cl27769    | GTP_EFTU superfamily      | - | -       |
|              | non-specific | 206640 | 15 | 168 | 2.83684e-11 | 60.1622 | cd00154    | Rab                       | - | cl21455 |
|              | superfamily  | 328724 | 15 | 168 | 2.83684e-11 | 60.1622 | cl21455    | P-loop_NTPase superfamily | - | -       |
|              | non-specific | 306559 | 15 | 165 | 1.0718e-09  | 55.5876 | pfam00071  | Ras                       | - | cl27030 |
|              | superfamily  | 331851 | 15 | 165 | 1.0718e-09  | 55.5876 | cl27030    | Ras superfamily           | - | -       |
| Llikebru1284 | specific     | 224025 | 16 | 173 | 1.6169e-06  | 47.6479 | COG1100    | Gem1                      | C | cl27030 |
|              | non-specific | 197466 | 24 | 165 | 3.21139e-06 | 46.014  | smart00010 | small_GTPase              | - | cl27030 |
|              | non-specific | 240385 | 24 | 165 | 5.23021e-06 | 45.6251 | PTZ00369   | PTZ00369                  | - | cl27030 |
|              | non-specific | 272973 | 19 | 164 | 0.000372262 | 40.0478 | TIGR00231  | small_GTP                 | - | cl27769 |
|              | superfamily  | 332590 | 19 | 164 | 0.000372262 | 40.0478 | cl27769    | GTP_EFTU superfamily      | - | -       |
|              | specific     | 206640 | 21 | 175 | 4.72418e-37 | 126.031 | cd00154    | Rab                       | - | cl21455 |
|              | superfamily  | 328724 | 21 | 175 | 4.72418e-37 | 126.031 | cl21455    | P-loop_NTPase superfamily | - | -       |
|              | non-specific | 306559 | 21 | 177 | 8.47538e-37 | 125.694 | pfam00071  | Ras                       | - | cl27030 |
|              | superfamily  | 331851 | 21 | 177 | 8.47538e-37 | 125.694 | cl27030    | Ras superfamily           | - | -       |
|              | non-specific | 197555 | 21 | 177 | 7.46657e-34 | 117.994 | smart00175 | RAB                       | - | cl27030 |
| Llikebru2131 | non-specific | 178655 | 27 | 170 | 7.36569e-19 | 80.3704 | PLN03108   | PLN03108                  | C | cl27030 |
|              | specific     | 224025 | 18 | 199 | 1.72659e-13 | 66.1375 | COG1100    | Gem1                      | - | cl27030 |
|              | non-specific | 272973 | 23 | 176 | 4.33648e-13 | 63.9301 | TIGR00231  | small_GTP                 | - | cl27769 |
|              | superfamily  | 332590 | 23 | 176 | 4.33648e-13 | 63.9301 | cl27769    | GTP_EFTU superfamily      | - | -       |
|              | specific     | 224025 | 4  | 114 | 4.22433e-15 | 72.6859 | COG1100    | Gem1                      | C | cl27030 |
|              | superfamily  | 331851 | 4  | 114 | 4.22433e-15 | 72.6859 | cl27030    | Ras superfamily           | C | -       |
|              | specific     | 206648 | 7  | 148 | 5.25482e-10 | 57.0811 | cd00882    | Ras_like_GTPase           | - | cl21455 |
|              | superfamily  | 328724 | 7  | 148 | 5.25482e-10 | 57.0811 | cl21455    | P-loop_NTPase superfamily | - | -       |
|              | non-specific | 306559 | 5  | 114 | 1.12851e-08 | 53.2764 | pfam00071  | Ras                       | C | cl27030 |
|              | non-specific | 197555 | 4  | 114 | 4.0567e-07  | 49.0435 | smart00175 | RAB                       | C | cl27030 |
| Llikebru2131 | non-specific | 272973 | 4  | 115 | 0.000724653 | 39.2774 | TIGR00231  | small_GTP                 | C | cl27769 |
|              | superfamily  | 332590 | 4  | 115 | 0.000724653 | 39.2774 | cl27769    | GTP_EFTU superfamily      | C | -       |
|              | non-specific | 178657 | 3  | 77  | 0.00108165  | 39.5267 | PLN03110   | PLN03110                  | C | cl27030 |

|         |              |        |    |     |             |         |            |                           |    |         |
|---------|--------------|--------|----|-----|-------------|---------|------------|---------------------------|----|---------|
| llo1716 | specific     | 206640 | 4  | 157 | 1.05413e-29 | 111.009 | cd00154    | Rab                       | -  | cl21455 |
|         | superfamily  | 328724 | 4  | 157 | 1.05413e-29 | 111.009 | cl21455    | P-loop_NTPase superfamily | -  | -       |
|         | specific     | 312094 | 5  | 116 | 3.02945e-25 | 97.5761 | pfam08477  | Roc                       | -  | cl21455 |
|         | non-specific | 197555 | 4  | 157 | 1.10899e-23 | 94.8822 | smart00175 | RAB                       | -  | cl27030 |
|         | superfamily  | 331851 | 4  | 157 | 1.10899e-23 | 94.8822 | cl27030    | Ras superfamily           | -  | -       |
|         | non-specific | 178657 | 4  | 116 | 4.24252e-15 | 73.039  | PLN03110   | PLN03110                  | C  | cl27030 |
|         | specific     | 224025 | 1  | 157 | 1.73196e-13 | 68.4487 | COG1100    | Gem1                      | -  | cl27030 |
|         | non-specific | 272973 | 4  | 152 | 1.07933e-12 | 64.7005 | TIGR00231  | small_GTP                 | -  | cl27769 |
|         | superfamily  | 332590 | 4  | 152 | 1.07933e-12 | 64.7005 | cl27769    | GTP_EFTU superfamily      | -  | -       |
| llo2329 | non-specific | 306559 | 32 | 177 | 2.27213e-44 | 149.191 | pfam00071  | Ras                       | -  | cl27030 |
|         | superfamily  | 331851 | 32 | 177 | 2.27213e-44 | 149.191 | cl27030    | Ras superfamily           | -  | -       |
|         | non-specific | 206661 | 26 | 184 | 5.15244e-41 | 140.542 | cd01869    | Rab1_Ypt1                 | -  | cl21455 |
|         | superfamily  | 328724 | 26 | 184 | 5.15244e-41 | 140.542 | cl21455    | P-loop_NTPase superfamily | -  | -       |
|         | non-specific | 197555 | 32 | 182 | 1.59852e-35 | 126.083 | smart00175 | RAB                       | -  | cl27030 |
|         | non-specific | 178657 | 14 | 213 | 2.25279e-24 | 98.4622 | PLN03110   | PLN03110                  | -  | cl27030 |
|         | specific     | 224025 | 32 | 192 | 3.36742e-16 | 76.1527 | COG1100    | Gem1                      | -  | cl27030 |
|         | non-specific | 272973 | 30 | 174 | 1.68272e-07 | 50.0629 | TIGR00231  | small_GTP                 | -  | cl27769 |
|         | superfamily  | 332590 | 30 | 174 | 1.68272e-07 | 50.0629 | cl27769    | GTP_EFTU superfamily      | -  | -       |
| llo2424 | specific     | 206648 | 16 | 157 | 1.66013e-07 | 48.2216 | cd00882    | Ras_like_GTPase           | -  | cl21455 |
|         | superfamily  | 328724 | 16 | 157 | 1.66013e-07 | 48.2216 | cl21455    | P-loop_NTPase superfamily | -  | -       |
|         | non-specific | 235392 | 85 | 167 | 9.56755e-07 | 47.4127 | PRK05291   | trmE                      | N  | cl26334 |
|         | superfamily  | 331155 | 85 | 167 | 9.56755e-07 | 47.4127 | cl26334    | MnmE_helical superfamily  | N  | -       |
|         | non-specific | 315327 | 85 | 167 | 2.41831e-05 | 43.215  | pfam12631  | MnmE_helical              | NC | cl26334 |
|         | non-specific | 225171 | 85 | 162 | 0.00775603  | 35.7078 | COG2262    | HflX                      | N  | cl25666 |
|         | superfamily  | 330487 | 85 | 162 | 0.00775603  | 35.7078 | cl25666    | HflX superfamily          | N  | -       |
| llo3288 | specific     | 206640 | 11 | 168 | 2.402e-46   | 153.381 | cd00154    | Rab                       | -  | cl21455 |
|         | superfamily  | 328724 | 11 | 168 | 2.402e-46   | 153.381 | cl21455    | P-loop_NTPase superfamily | -  | -       |
|         | non-specific | 197555 | 11 | 171 | 5.86619e-46 | 152.662 | smart00175 | RAB                       | -  | cl27030 |
|         | superfamily  | 331851 | 11 | 171 | 5.86619e-46 | 152.662 | cl27030    | Ras superfamily           | -  | -       |
|         | non-specific | 306559 | 12 | 171 | 8.01284e-42 | 141.872 | pfam00071  | Ras                       | -  | cl27030 |

|           |              |        |    |     |             |         |            |                           |   |         |
|-----------|--------------|--------|----|-----|-------------|---------|------------|---------------------------|---|---------|
| Llo981808 | non-specific | 178657 | 1  | 171 | 2.67464e-29 | 111.174 | PLN03110   | PLN03110                  | - | cl27030 |
|           | specific     | 224025 | 7  | 206 | 5.96626e-20 | 86.1679 | COG1100    | Gem1                      | - | cl27030 |
|           | non-specific | 272973 | 12 | 166 | 1.16475e-14 | 70.0933 | TIGR00231  | small_GTP                 | - | cl27769 |
|           | superfamily  | 332590 | 12 | 166 | 1.16475e-14 | 70.0933 | cl27769    | GTP_EFTU superfamily      | - | -       |
|           | specific     | 206640 | 18 | 171 | 1.54906e-28 | 107.927 | cd00154    | Rab                       | - | cl21455 |
|           | superfamily  | 328724 | 18 | 171 | 1.54906e-28 | 107.927 | cl21455    | P-loop_NTPase superfamily | - | -       |
|           | specific     | 312094 | 19 | 130 | 8.99544e-25 | 96.8057 | pfam08477  | Roc                       | - | cl21455 |
|           | non-specific | 197555 | 18 | 171 | 7.29243e-23 | 92.9563 | smart00175 | RAB                       | - | cl27030 |
|           | superfamily  | 331851 | 18 | 171 | 7.29243e-23 | 92.9563 | cl27030    | Ras superfamily           | - | -       |
|           | non-specific | 178657 | 18 | 130 | 1.06423e-14 | 71.8834 | PLN03110   | PLN03110                  | C | cl27030 |
| Llo982467 | specific     | 224025 | 15 | 137 | 1.30622e-12 | 66.1375 | COG1100    | Gem1                      | C | cl27030 |
|           | non-specific | 272973 | 18 | 166 | 2.91474e-12 | 63.9301 | TIGR00231  | small_GTP                 | - | cl27769 |
|           | superfamily  | 332590 | 18 | 166 | 2.91474e-12 | 63.9301 | cl27769    | GTP_EFTU superfamily      | - | -       |
|           | non-specific | 306559 | 32 | 177 | 1.61205e-44 | 149.576 | pfam00071  | Ras                       | - | cl27030 |
|           | superfamily  | 331851 | 32 | 177 | 1.61205e-44 | 149.576 | cl27030    | Ras superfamily           | - | -       |
|           | non-specific | 206661 | 26 | 184 | 4.02952e-41 | 140.927 | cd01869    | Rab1_Ypt1                 | - | cl21455 |
|           | superfamily  | 328724 | 26 | 184 | 4.02952e-41 | 140.927 | cl21455    | P-loop_NTPase superfamily | - | -       |
|           | non-specific | 197555 | 32 | 182 | 1.37772e-35 | 126.469 | smart00175 | RAB                       | - | cl27030 |
|           | non-specific | 178657 | 14 | 213 | 1.83064e-23 | 96.151  | PLN03110   | PLN03110                  | - | cl27030 |
|           | specific     | 224025 | 32 | 192 | 2.45358e-16 | 76.5379 | COG1100    | Gem1                      | - | cl27030 |
| Llo983459 | non-specific | 272973 | 30 | 174 | 1.21507e-07 | 50.4481 | TIGR00231  | small_GTP                 | - | cl27769 |
|           | superfamily  | 332590 | 30 | 174 | 1.21507e-07 | 50.4481 | cl27769    | GTP_EFTU superfamily      | - | -       |
|           | specific     | 206640 | 11 | 168 | 2.4809e-46  | 153.381 | cd00154    | Rab                       | - | cl21455 |
|           | superfamily  | 328724 | 11 | 168 | 2.4809e-46  | 153.381 | cl21455    | P-loop_NTPase superfamily | - | -       |
|           | non-specific | 197555 | 11 | 171 | 5.9939e-46  | 152.662 | smart00175 | RAB                       | - | cl27030 |
|           | superfamily  | 331851 | 11 | 171 | 5.9939e-46  | 152.662 | cl27030    | Ras superfamily           | - | -       |
|           | non-specific | 306559 | 12 | 171 | 9.93158e-42 | 141.487 | pfam00071  | Ras                       | - | cl27030 |
|           | non-specific | 178657 | 1  | 171 | 2.67464e-29 | 111.174 | PLN03110   | PLN03110                  | - | cl27030 |
|           | specific     | 224025 | 7  | 206 | 8.2603e-20  | 85.7827 | COG1100    | Gem1                      | - | cl27030 |
|           | non-specific | 272973 | 12 | 166 | 1.49647e-14 | 69.7081 | TIGR00231  | small_GTP                 | - | cl27769 |

|           |              |        |    |     |             |         |            |                           |    |         |
|-----------|--------------|--------|----|-----|-------------|---------|------------|---------------------------|----|---------|
| LloAT1802 | superfamily  | 332590 | 12 | 166 | 1.49647e-14 | 69.7081 | cl27769    | GTP_EFTU superfamily      | -  | -       |
|           | specific     | 206640 | 18 | 171 | 2.03632e-29 | 110.238 | cd00154    | Rab                       | -  | cl21455 |
|           | superfamily  | 328724 | 18 | 171 | 2.03632e-29 | 110.238 | cl21455    | P-loop_NTPase superfamily | -  | -       |
|           | specific     | 312094 | 19 | 130 | 4.92609e-25 | 97.1909 | pfam08477  | Roc                       | -  | cl21455 |
|           | non-specific | 197555 | 18 | 171 | 1.48173e-23 | 94.8822 | smart00175 | RAB                       | -  | cl27030 |
|           | superfamily  | 331851 | 18 | 171 | 1.48173e-23 | 94.8822 | cl27030    | Ras superfamily           | -  | -       |
|           | non-specific | 178657 | 18 | 130 | 4.41873e-15 | 73.039  | PLN03110   | PLN03110                  | C  | cl27030 |
|           | specific     | 224025 | 15 | 171 | 3.84402e-13 | 67.6783 | COG1100    | Gem1                      | -  | cl27030 |
|           | non-specific | 272973 | 18 | 166 | 1.89659e-12 | 64.3153 | TIGR00231  | small_GTP                 | -  | cl27769 |
| LloAT2494 | superfamily  | 332590 | 18 | 166 | 1.89659e-12 | 64.3153 | cl27769    | GTP_EFTU superfamily      | -  | -       |
|           | non-specific | 306559 | 32 | 177 | 2.27213e-44 | 149.191 | pfam00071  | Ras                       | -  | cl27030 |
|           | superfamily  | 331851 | 32 | 177 | 2.27213e-44 | 149.191 | cl27030    | Ras superfamily           | -  | -       |
|           | non-specific | 206661 | 26 | 184 | 5.15244e-41 | 140.542 | cd01869    | Rab1_Ypt1                 | -  | cl21455 |
|           | superfamily  | 328724 | 26 | 184 | 5.15244e-41 | 140.542 | cl21455    | P-loop_NTPase superfamily | -  | -       |
|           | non-specific | 197555 | 32 | 182 | 1.59852e-35 | 126.083 | smart00175 | RAB                       | -  | cl27030 |
|           | non-specific | 178657 | 14 | 213 | 2.25279e-24 | 98.4622 | PLN03110   | PLN03110                  | -  | cl27030 |
|           | specific     | 224025 | 32 | 192 | 3.36742e-16 | 76.1527 | COG1100    | Gem1                      | -  | cl27030 |
|           | non-specific | 272973 | 30 | 174 | 1.68272e-07 | 50.0629 | TIGR00231  | small_GTP                 | -  | cl27769 |
| LloAT2599 | superfamily  | 332590 | 30 | 174 | 1.68272e-07 | 50.0629 | cl27769    | GTP_EFTU superfamily      | -  | -       |
|           | specific     | 206648 | 16 | 157 | 1.66013e-07 | 48.2216 | cd00882    | Ras_like_GTPase           | -  | cl21455 |
|           | superfamily  | 328724 | 16 | 157 | 1.66013e-07 | 48.2216 | cl21455    | P-loop_NTPase superfamily | -  | -       |
|           | non-specific | 235392 | 85 | 167 | 9.56755e-07 | 47.4127 | PRK05291   | trmE                      | N  | cl26334 |
|           | superfamily  | 331155 | 85 | 167 | 9.56755e-07 | 47.4127 | cl26334    | MnmE_helical superfamily  | N  | -       |
|           | non-specific | 315327 | 85 | 167 | 2.41831e-05 | 43.215  | pfam12631  | MnmE_helical              | NC | cl26334 |
|           | non-specific | 225171 | 85 | 162 | 0.00775603  | 35.7078 | COG2262    | HflX                      | N  | cl25666 |
|           | superfamily  | 330487 | 85 | 162 | 0.00775603  | 35.7078 | cl25666    | HflX superfamily          | N  | -       |
|           | specific     | 206640 | 11 | 168 | 2.402e-46   | 153.381 | cd00154    | Rab                       | -  | cl21455 |
| LloAT3527 | superfamily  | 328724 | 11 | 168 | 2.402e-46   | 153.381 | cl21455    | P-loop_NTPase superfamily | -  | -       |
|           | non-specific | 197555 | 11 | 171 | 5.86619e-46 | 152.662 | smart00175 | RAB                       | -  | cl27030 |
|           | superfamily  | 331851 | 11 | 171 | 5.86619e-46 | 152.662 | cl27030    | Ras superfamily           | -  | -       |



|              |              |              |        |     |             |             |            |                           |          |         |
|--------------|--------------|--------------|--------|-----|-------------|-------------|------------|---------------------------|----------|---------|
| Llon1496     | non-specific | 306559       | 12     | 171 | 8.01284e-42 | 141.872     | pfam00071  | Ras                       | -        | cl27030 |
|              | non-specific | 178657       | 1      | 171 | 2.67464e-29 | 111.174     | PLN03110   | PLN03110                  | -        | cl27030 |
|              | specific     | 224025       | 7      | 206 | 5.96626e-20 | 86.1679     | COG1100    | Gem1                      | -        | cl27030 |
|              | non-specific | 272973       | 12     | 166 | 1.16475e-14 | 70.0933     | TIGR00231  | small_GTP                 | -        | cl27769 |
|              | superfamily  | 332590       | 12     | 166 | 1.16475e-14 | 70.0933     | cl27769    | GTP_EFTU superfamily      | -        | -       |
|              | non-specific | 206640       | 11     | 151 | 2.26648e-20 | 85.9706     | cd00154    | Rab                       | -        | cl21455 |
|              | superfamily  | 328724       | 11     | 151 | 2.26648e-20 | 85.9706     | cl21455    | P-loop_NTPase superfamily | -        | -       |
|              | specific     | 224025       | 11     | 168 | 2.97332e-14 | 70.7599     | COG1100    | Gem1                      | -        | cl27030 |
|              | superfamily  | 331851       | 11     | 168 | 2.97332e-14 | 70.7599     | cl27030    | Ras superfamily           | -        | -       |
|              | non-specific | 197555       | 11     | 151 | 2.63446e-13 | 66.7627     | smart00175 | RAB                       | -        | cl27030 |
|              | non-specific | 306559       | 11     | 151 | 1.06742e-12 | 64.8324     | pfam00071  | Ras                       | -        | cl27030 |
|              | non-specific | 272973       | 11     | 151 | 2.09905e-08 | 52.7593     | TIGR00231  | small_GTP                 | -        | cl27769 |
|              | superfamily  | 332590       | 11     | 151 | 2.09905e-08 | 52.7593     | cl27769    | GTP_EFTU superfamily      | -        | -       |
|              | Lma0833      | non-specific | 178655 | 11  | 167         | 6.01636e-07 | 49.1692    | PLN03108                  | PLN03108 | -       |
| specific     |              | 224025       | 2      | 188 | 3.17094e-12 | 64.9819     | COG1100    | Gem1                      | -        | cl27030 |
| superfamily  |              | 331851       | 2      | 188 | 3.17094e-12 | 64.9819     | cl27030    | Ras superfamily           | -        | -       |
| specific     |              | 206648       | 6      | 149 | 1.36547e-09 | 56.3107     | cd00882    | Ras_like_GTPase           | -        | cl21455 |
| superfamily  |              | 328724       | 6      | 149 | 1.36547e-09 | 56.3107     | cl21455    | P-loop_NTPase superfamily | -        | -       |
| non-specific |              | 312094       | 5      | 123 | 2.11033e-05 | 42.8778     | pfam08477  | Roc                       | -        | cl21455 |
| non-specific |              | 272973       | 2      | 124 | 0.00281869  | 37.7366     | TIGR00231  | small_GTP                 | C        | cl27769 |
| Lma1004      | superfamily  | 332590       | 2      | 124 | 0.00281869  | 37.7366     | cl27769    | GTP_EFTU superfamily      | C        | -       |
|              | non-specific | 206640       | 10     | 154 | 1.43612e-21 | 89.4374     | cd00154    | Rab                       | -        | cl21455 |
|              | superfamily  | 328724       | 10     | 154 | 1.43612e-21 | 89.4374     | cl21455    | P-loop_NTPase superfamily | -        | -       |
|              | non-specific | 197555       | 10     | 154 | 2.73132e-13 | 66.7627     | smart00175 | RAB                       | -        | cl27030 |
|              | superfamily  | 331851       | 10     | 154 | 2.73132e-13 | 66.7627     | cl27030    | Ras superfamily           | -        | -       |
|              | non-specific | 306559       | 10     | 154 | 4.78412e-11 | 60.21       | pfam00071  | Ras                       | -        | cl27030 |
|              | specific     | 224025       | 1      | 155 | 6.22577e-08 | 52.2703     | COG1100    | Gem1                      | -        | cl27030 |
|              | non-specific | 272973       | 7      | 149 | 6.92597e-06 | 45.4405     | TIGR00231  | small_GTP                 | -        | cl27769 |
|              | superfamily  | 332590       | 7      | 149 | 6.92597e-06 | 45.4405     | cl27769    | GTP_EFTU superfamily      | -        | -       |
|              | non-specific | 178655       | 10     | 162 | 0.000420367 | 40.6948     | PLN03108   | PLN03108                  | -        | cl27030 |

|           |              |        |     |     |             |         |            |                           |    |         |
|-----------|--------------|--------|-----|-----|-------------|---------|------------|---------------------------|----|---------|
| Lma1540   | non-specific | 293602 | 181 | 297 | 0.00795228  | 37.6751 | pfam16997  | Wap1                      | NC | cl25249 |
|           | superfamily  | 293602 | 181 | 297 | 0.00795228  | 37.6751 | cl25249    | Wap1 superfamily          | NC | -       |
|           | specific     | 206640 | 3   | 161 | 2.56834e-35 | 124.105 | cd00154    | Rab                       | -  | cl21455 |
|           | superfamily  | 328724 | 3   | 161 | 2.56834e-35 | 124.105 | cl21455    | P-loop_NTPase superfamily | -  | -       |
|           | non-specific | 197555 | 3   | 159 | 1.24636e-28 | 106.823 | smart00175 | RAB                       | -  | cl27030 |
|           | superfamily  | 331851 | 3   | 159 | 1.24636e-28 | 106.823 | cl27030    | Ras superfamily           | -  | -       |
|           | non-specific | 306559 | 14  | 162 | 1.15034e-24 | 96.4187 | pfam00071  | Ras                       | -  | cl27030 |
| LmasA0793 | specific     | 224025 | 2   | 182 | 2.01581e-17 | 78.4639 | COG1100    | Gem1                      | -  | cl27030 |
|           | non-specific | 178655 | 9   | 151 | 7.27478e-14 | 68.4292 | PLN03108   | PLN03108                  | C  | cl27030 |
|           | non-specific | 312094 | 4   | 127 | 1.99942e-19 | 82.1681 | pfam08477  | Roc                       | -  | cl21455 |
|           | superfamily  | 328724 | 4   | 127 | 1.99942e-19 | 82.1681 | cl21455    | P-loop_NTPase superfamily | -  | -       |
|           | specific     | 206648 | 6   | 166 | 6.91556e-19 | 82.1191 | cd00882    | Ras_like_GTPase           | -  | cl21455 |
|           | non-specific | 197555 | 3   | 169 | 1.35828e-14 | 70.2295 | smart00175 | RAB                       | -  | cl27030 |
|           | superfamily  | 331851 | 3   | 169 | 1.35828e-14 | 70.2295 | cl27030    | Ras superfamily           | -  | -       |
|           | specific     | 224025 | 2   | 127 | 3.42079e-13 | 67.6783 | COG1100    | Gem1                      | C  | cl27030 |
|           | non-specific | 272973 | 2   | 166 | 4.44158e-13 | 65.8561 | TIGR00231  | small_GTP                 | -  | cl27769 |
|           | superfamily  | 332590 | 2   | 166 | 4.44158e-13 | 65.8561 | cl27769    | GTP_EFTU superfamily      | -  | -       |
| LmasA1290 | non-specific | 215587 | 1   | 178 | 5.00329e-09 | 55.4467 | PLN03118   | PLN03118                  | -  | cl27030 |
|           | non-specific | 315327 | 70  | 210 | 0.00531192  | 37.8222 | pfam12631  | MnmE_helical              | N  | cl26334 |
|           | superfamily  | 331155 | 70  | 210 | 0.00531192  | 37.8222 | cl26334    | MnmE_helical superfamily  | N  | -       |
|           | non-specific | 306559 | 15  | 159 | 1.66778e-08 | 50.9652 | pfam00071  | Ras                       | -  | cl27030 |
|           | superfamily  | 331851 | 15  | 159 | 1.66778e-08 | 50.9652 | cl27030    | Ras superfamily           | -  | -       |
|           | specific     | 206648 | 16  | 156 | 2.59981e-08 | 50.1476 | cd00882    | Ras_like_GTPase           | -  | cl21455 |
|           | superfamily  | 328724 | 16  | 156 | 2.59981e-08 | 50.1476 | cl21455    | P-loop_NTPase superfamily | -  | -       |
|           | non-specific | 235392 | 87  | 160 | 4.42854e-07 | 48.1831 | PRK05291   | trmE                      | N  | cl26334 |
|           | superfamily  | 331155 | 87  | 160 | 4.42854e-07 | 48.1831 | cl26334    | MnmE_helical superfamily  | N  | -       |
|           | specific     | 224025 | 15  | 164 | 2.97773e-06 | 45.3367 | COG1100    | Gem1                      | C  | cl27030 |
| LmasA1512 | non-specific | 197555 | 87  | 160 | 0.00413498  | 35.9467 | smart00175 | RAB                       | N  | cl27030 |
|           | non-specific | 206661 | 691 | 850 | 7.41535e-54 | 184.069 | cd01869    | Rab1_Ypt1                 | -  | cl21455 |
|           | superfamily  | 328724 | 691 | 850 | 7.41535e-54 | 184.069 | cl21455    | P-loop_NTPase superfamily | -  | -       |

|           |              |        |     |     |             |         |            |                           |   |         |
|-----------|--------------|--------|-----|-----|-------------|---------|------------|---------------------------|---|---------|
|           | specific     | 306559 | 692 | 851 | 4.67606e-53 | 181.933 | pfam00071  | Ras                       | - | cl27030 |
|           | superfamily  | 331851 | 692 | 851 | 4.67606e-53 | 181.933 | cl27030    | Ras superfamily           | - | -       |
|           | non-specific | 197555 | 691 | 853 | 2.36592e-49 | 171.537 | smart00175 | RAB                       | - | cl27030 |
|           | non-specific | 178655 | 691 | 853 | 6.30955e-32 | 123.513 | PLN03108   | PLN03108                  | - | cl27030 |
|           | specific     | 224025 | 688 | 851 | 5.96497e-25 | 103.887 | COG1100    | Gem1                      | - | cl27030 |
|           | non-specific | 272973 | 691 | 846 | 7.68012e-17 | 78.5677 | TIGR00231  | small_GTP                 | - | cl27769 |
|           | superfamily  | 332590 | 691 | 846 | 7.68012e-17 | 78.5677 | cl27769    | GTP_EFTU superfamily      | - | -       |
| LmasA2084 | specific     | 206648 | 9   | 156 | 1.56876e-15 | 72.8743 | cd00882    | Ras_like_GTPase           | - | cl21455 |
|           | superfamily  | 328724 | 9   | 156 | 1.56876e-15 | 72.8743 | cl21455    | P-loop_NTPase superfamily | - | -       |
|           | specific     | 224025 | 2   | 188 | 9.49668e-10 | 57.6631 | COG1100    | Gem1                      | - | cl27030 |
|           | superfamily  | 331851 | 2   | 188 | 9.49668e-10 | 57.6631 | cl27030    | Ras superfamily           | - | -       |
|           | non-specific | 197555 | 10  | 157 | 1.18702e-09 | 56.3623 | smart00175 | RAB                       | - | cl27030 |
|           | non-specific | 306524 | 9   | 157 | 3.71505e-08 | 52.2313 | pfam00025  | Arf                       | - | cl21455 |
|           | non-specific | 272973 | 7   | 154 | 1.74185e-07 | 50.0629 | TIGR00231  | small_GTP                 | - | cl27769 |
|           | superfamily  | 332590 | 7   | 154 | 1.74185e-07 | 50.0629 | cl27769    | GTP_EFTU superfamily      | - | -       |
|           | non-specific | 234624 | 7   | 155 | 0.0011708   | 40.0307 | PRK00089   | era                       | C | cl26333 |
|           | superfamily  | 331154 | 7   | 155 | 0.0011708   | 40.0307 | cl26333    | FeoB_N superfamily        | C | -       |
| LmasA2851 | non-specific | 312094 | 12  | 93  | 1.11575e-11 | 59.0562 | pfam08477  | Roc                       | C | cl21455 |
|           | superfamily  | 328724 | 12  | 93  | 1.11575e-11 | 59.0562 | cl21455    | P-loop_NTPase superfamily | C | -       |
|           | non-specific | 206640 | 11  | 83  | 4.15101e-11 | 58.6214 | cd00154    | Rab                       | C | cl21455 |
|           | non-specific | 197555 | 11  | 86  | 4.65596e-11 | 58.2883 | smart00175 | RAB                       | C | cl27030 |
|           | superfamily  | 331851 | 11  | 86  | 4.65596e-11 | 58.2883 | cl27030    | Ras superfamily           | C | -       |
|           | non-specific | 215587 | 10  | 79  | 1.20517e-10 | 58.1431 | PLN03118   | PLN03118                  | C | cl27030 |
|           | specific     | 224025 | 9   | 83  | 0.00392929  | 36.8623 | COG1100    | Gem1                      | C | cl27030 |
|           | non-specific | 272973 | 10  | 83  | 0.00901314  | 35.4254 | TIGR00231  | small_GTP                 | C | cl27769 |
|           | superfamily  | 332590 | 10  | 83  | 0.00901314  | 35.4254 | cl27769    | GTP_EFTU superfamily      | C | -       |
| LmasA3184 | non-specific | 312094 | 9   | 115 | 7.05901e-15 | 69.8418 | pfam08477  | Roc                       | - | cl21455 |
|           | superfamily  | 328724 | 9   | 115 | 7.05901e-15 | 69.8418 | cl21455    | P-loop_NTPase superfamily | - | -       |
|           | non-specific | 206640 | 3   | 153 | 1.50785e-14 | 70.1774 | cd00154    | Rab                       | - | cl21455 |
|           | specific     | 224025 | 2   | 210 | 1.92852e-14 | 71.5303 | COG1100    | Gem1                      | - | cl27030 |

|           |              |        |     |     |             |         |            |                           |    |         |
|-----------|--------------|--------|-----|-----|-------------|---------|------------|---------------------------|----|---------|
|           | superfamily  | 331851 | 2   | 210 | 1.92852e-14 | 71.5303 | cl27030    | Ras superfamily           | -  | -       |
|           | non-specific | 215587 | 1   | 123 | 1.98824e-11 | 62.3803 | PLN03118   | PLN03118                  | C  | cl27030 |
|           | non-specific | 197555 | 12  | 139 | 1.59667e-09 | 55.9771 | smart00175 | RAB                       | -  | cl27030 |
|           | non-specific | 272973 | 2   | 153 | 2.93511e-08 | 52.3741 | TIGR00231  | small_GTP                 | -  | cl27769 |
|           | superfamily  | 332590 | 2   | 153 | 2.93511e-08 | 52.3741 | cl27769    | GTP_EFTU superfamily      | -  | -       |
| LmasA3659 | non-specific | 206640 | 29  | 111 | 9.04954e-15 | 69.0218 | cd00154    | Rab                       | C  | cl21455 |
|           | superfamily  | 328724 | 29  | 111 | 9.04954e-15 | 69.0218 | cl21455    | P-loop_NTPase superfamily | C  | -       |
|           | non-specific | 312094 | 30  | 111 | 1.33125e-13 | 64.8342 | pfam08477  | Roc                       | C  | cl21455 |
|           | non-specific | 197555 | 29  | 111 | 4.11679e-13 | 64.8367 | smart00175 | RAB                       | C  | cl27030 |
|           | superfamily  | 331851 | 29  | 111 | 4.11679e-13 | 64.8367 | cl27030    | Ras superfamily           | C  | -       |
|           | non-specific | 215587 | 28  | 229 | 7.51779e-10 | 56.6023 | PLN03118   | PLN03118                  | -  | cl27030 |
|           | superfamily  | 331851 | 28  | 229 | 7.51779e-10 | 56.6023 | cl27030    | Ras superfamily           | -  | -       |
|           | non-specific | 178657 | 30  | 104 | 1.05351e-08 | 53.3939 | PLN03110   | PLN03110                  | C  | cl27030 |
|           | specific     | 224025 | 27  | 110 | 5.89643e-06 | 45.3367 | COG1100    | Gem1                      | C  | cl27030 |
| LmasA3690 | non-specific | 197555 | 657 | 811 | 1.11751e-31 | 121.076 | smart00175 | RAB                       | -  | cl27030 |
|           | superfamily  | 331851 | 657 | 811 | 1.11751e-31 | 121.076 | cl27030    | Ras superfamily           | -  | -       |
|           | specific     | 206640 | 657 | 815 | 8.91839e-31 | 118.327 | cd00154    | Rab                       | -  | cl21455 |
|           | superfamily  | 328724 | 657 | 815 | 8.91839e-31 | 118.327 | cl21455    | P-loop_NTPase superfamily | -  | -       |
|           | non-specific | 306559 | 659 | 820 | 6.64335e-29 | 112.982 | pfam00071  | Ras                       | -  | cl27030 |
|           | specific     | 238125 | 57  | 181 | 3.38114e-19 | 83.9722 | cd00204    | ANK                       | -  | cl02529 |
|           | superfamily  | 321973 | 57  | 181 | 3.38114e-19 | 83.9722 | cl02529    | ANK superfamily           | -  | -       |
|           | non-specific | 215587 | 647 | 811 | 3.21092e-16 | 78.1735 | PLN03118   | PLN03118                  | C  | cl27030 |
|           | specific     | 224025 | 656 | 829 | 6.71955e-15 | 74.6119 | COG1100    | Gem1                      | -  | cl27030 |
|           | specific     | 315466 | 67  | 152 | 1.31696e-12 | 63.9753 | pfam12796  | Ank_2                     | -  | cl26073 |
|           | superfamily  | 330894 | 67  | 152 | 1.31696e-12 | 63.9753 | cl26073    | Ank_2 superfamily         | -  | -       |
|           | non-specific | 272973 | 659 | 813 | 2.45867e-08 | 53.9149 | TIGR00231  | small_GTP                 | -  | cl27769 |
|           | superfamily  | 332590 | 659 | 813 | 2.45867e-08 | 53.9149 | cl27769    | GTP_EFTU superfamily      | -  | -       |
|           | specific     | 223738 | 23  | 118 | 1.13963e-06 | 50.5931 | COG0666    | ANKYR                     | N  | cl26073 |
|           | non-specific | 222939 | 61  | 163 | 1.2316e-05  | 48.3378 | PHA02878   | PHA02878                  | NC | cl26073 |
|           | specific     | 197603 | 62  | 91  | 0.000110941 | 39.8786 | smart00248 | ANK                       | -  | cl02529 |

|              |              |              |        |     |             |             |            |                           |           |         |
|--------------|--------------|--------------|--------|-----|-------------|-------------|------------|---------------------------|-----------|---------|
| LmasA3771    | non-specific | 206713       | 15     | 115 | 5.91634e-07 | 48.042      | cd04146    | RERG_RasL11_like          | N         | cl21455 |
|              | superfamily  | 328724       | 15     | 115 | 5.91634e-07 | 48.042      | cl21455    | P-loop_NTPase superfamily | N         | -       |
|              | non-specific | 306559       | 49     | 120 | 5.21016e-05 | 42.1056     | pfam00071  | Ras                       | N         | cl27030 |
|              | superfamily  | 331851       | 49     | 120 | 5.21016e-05 | 42.1056     | cl27030    | Ras superfamily           | N         | -       |
|              | non-specific | 197554       | 51     | 112 | 0.00910944  | 35.667      | smart00174 | RHO                       | NC        | cl27030 |
| LmasB0793    | non-specific | 312094       | 4      | 127 | 1.99942e-19 | 82.1681     | pfam08477  | Roc                       | -         | cl21455 |
|              | superfamily  | 328724       | 4      | 127 | 1.99942e-19 | 82.1681     | cl21455    | P-loop_NTPase superfamily | -         | -       |
|              | specific     | 206648       | 6      | 166 | 6.91556e-19 | 82.1191     | cd00882    | Ras_like_GTPase           | -         | cl21455 |
|              | non-specific | 197555       | 3      | 169 | 1.35828e-14 | 70.2295     | smart00175 | RAB                       | -         | cl27030 |
|              | superfamily  | 331851       | 3      | 169 | 1.35828e-14 | 70.2295     | cl27030    | Ras superfamily           | -         | -       |
|              | specific     | 224025       | 2      | 127 | 3.42079e-13 | 67.6783     | COG1100    | Gem1                      | C         | cl27030 |
|              | non-specific | 272973       | 2      | 166 | 4.44158e-13 | 65.8561     | TIGR00231  | small_GTP                 | -         | cl27769 |
|              | superfamily  | 332590       | 2      | 166 | 4.44158e-13 | 65.8561     | cl27769    | GTP_EFTU superfamily      | -         | -       |
|              | non-specific | 215587       | 1      | 178 | 5.00329e-09 | 55.4467     | PLN03118   | PLN03118                  | -         | cl27030 |
|              | non-specific | 315327       | 70     | 210 | 0.00531192  | 37.8222     | pfam12631  | MnmE_helical              | N         | cl26334 |
| LmasB1290    | superfamily  | 331155       | 70     | 210 | 0.00531192  | 37.8222     | cl26334    | MnmE_helical superfamily  | N         | -       |
|              | non-specific | 306559       | 15     | 159 | 1.66778e-08 | 50.9652     | pfam00071  | Ras                       | -         | cl27030 |
|              | superfamily  | 331851       | 15     | 159 | 1.66778e-08 | 50.9652     | cl27030    | Ras superfamily           | -         | -       |
|              | specific     | 206648       | 16     | 156 | 2.59981e-08 | 50.1476     | cd00882    | Ras_like_GTPase           | -         | cl21455 |
|              | superfamily  | 328724       | 16     | 156 | 2.59981e-08 | 50.1476     | cl21455    | P-loop_NTPase superfamily | -         | -       |
|              | non-specific | 235392       | 87     | 160 | 4.42854e-07 | 48.1831     | PRK05291   | trmE                      | N         | cl26334 |
|              | superfamily  | 331155       | 87     | 160 | 4.42854e-07 | 48.1831     | cl26334    | MnmE_helical superfamily  | N         | -       |
|              | specific     | 224025       | 15     | 164 | 2.97773e-06 | 45.3367     | COG1100    | Gem1                      | C         | cl27030 |
|              | non-specific | 197555       | 87     | 160 | 0.00413498  | 35.9467     | smart00175 | RAB                       | N         | cl27030 |
|              | LmasB1512    | non-specific | 206661 | 691 | 850         | 7.41535e-54 | 184.069    | cd01869                   | Rab1_Ypt1 | -       |
| superfamily  |              | 328724       | 691    | 850 | 7.41535e-54 | 184.069     | cl21455    | P-loop_NTPase superfamily | -         | -       |
| specific     |              | 306559       | 692    | 851 | 4.67606e-53 | 181.933     | pfam00071  | Ras                       | -         | cl27030 |
| superfamily  |              | 331851       | 692    | 851 | 4.67606e-53 | 181.933     | cl27030    | Ras superfamily           | -         | -       |
| non-specific |              | 197555       | 691    | 853 | 2.36592e-49 | 171.537     | smart00175 | RAB                       | -         | cl27030 |
| non-specific |              | 178655       | 691    | 853 | 6.30955e-32 | 123.513     | PLN03108   | PLN03108                  | -         | cl27030 |

|              |              |              |        |     |             |             |            |                           |                           |         |         |
|--------------|--------------|--------------|--------|-----|-------------|-------------|------------|---------------------------|---------------------------|---------|---------|
| LmasB2084    | specific     | 224025       | 688    | 851 | 5.96497e-25 | 103.887     | COG1100    | Gem1                      | -                         | cl27030 |         |
|              | non-specific | 272973       | 691    | 846 | 7.68012e-17 | 78.5677     | TIGR00231  | small_GTP                 | -                         | cl27769 |         |
|              | superfamily  | 332590       | 691    | 846 | 7.68012e-17 | 78.5677     | cl27769    | GTP_EFTU superfamily      | -                         | -       |         |
|              | specific     | 206648       | 9      | 156 | 1.56876e-15 | 72.8743     | cd00882    | Ras_like_GTPase           | -                         | cl21455 |         |
|              | superfamily  | 328724       | 9      | 156 | 1.56876e-15 | 72.8743     | cl21455    | P-loop_NTPase superfamily | -                         | -       |         |
|              | specific     | 224025       | 2      | 188 | 9.49668e-10 | 57.6631     | COG1100    | Gem1                      | -                         | cl27030 |         |
|              | superfamily  | 331851       | 2      | 188 | 9.49668e-10 | 57.6631     | cl27030    | Ras superfamily           | -                         | -       |         |
|              | non-specific | 197555       | 10     | 157 | 1.18702e-09 | 56.3623     | smart00175 | RAB                       | -                         | cl27030 |         |
|              | non-specific | 306524       | 9      | 157 | 3.71505e-08 | 52.2313     | pfam00025  | Arf                       | -                         | cl21455 |         |
|              | non-specific | 272973       | 7      | 154 | 1.74185e-07 | 50.0629     | TIGR00231  | small_GTP                 | -                         | cl27769 |         |
|              | superfamily  | 332590       | 7      | 154 | 1.74185e-07 | 50.0629     | cl27769    | GTP_EFTU superfamily      | -                         | -       |         |
|              | non-specific | 234624       | 7      | 155 | 0.0011708   | 40.0307     | PRK00089   | era                       | C                         | cl26333 |         |
| LmasB2851    | superfamily  | 331154       | 7      | 155 | 0.0011708   | 40.0307     | cl26333    | FeoB_N superfamily        | C                         | -       |         |
|              | non-specific | 312094       | 12     | 93  | 1.11575e-11 | 59.0562     | pfam08477  | Roc                       | C                         | cl21455 |         |
|              | superfamily  | 328724       | 12     | 93  | 1.11575e-11 | 59.0562     | cl21455    | P-loop_NTPase superfamily | C                         | -       |         |
|              | non-specific | 206640       | 11     | 83  | 4.15101e-11 | 58.6214     | cd00154    | Rab                       | C                         | cl21455 |         |
|              | non-specific | 197555       | 11     | 86  | 4.65596e-11 | 58.2883     | smart00175 | RAB                       | C                         | cl27030 |         |
|              | superfamily  | 331851       | 11     | 86  | 4.65596e-11 | 58.2883     | cl27030    | Ras superfamily           | C                         | -       |         |
|              | non-specific | 215587       | 10     | 79  | 1.20517e-10 | 58.1431     | PLN03118   | PLN03118                  | C                         | cl27030 |         |
|              | specific     | 224025       | 9      | 83  | 0.00392929  | 36.8623     | COG1100    | Gem1                      | C                         | cl27030 |         |
|              | non-specific | 272973       | 10     | 83  | 0.00901314  | 35.4254     | TIGR00231  | small_GTP                 | C                         | cl27769 |         |
|              | superfamily  | 332590       | 10     | 83  | 0.00901314  | 35.4254     | cl27769    | GTP_EFTU superfamily      | C                         | -       |         |
|              | LmasB3184    | non-specific | 312094 | 9   | 115         | 7.05901e-15 | 69.8418    | pfam08477                 | Roc                       | -       | cl21455 |
|              |              | superfamily  | 328724 | 9   | 115         | 7.05901e-15 | 69.8418    | cl21455                   | P-loop_NTPase superfamily | -       | -       |
| non-specific |              | 206640       | 3      | 153 | 1.50785e-14 | 70.1774     | cd00154    | Rab                       | -                         | cl21455 |         |
| specific     |              | 224025       | 2      | 210 | 1.92852e-14 | 71.5303     | COG1100    | Gem1                      | -                         | cl27030 |         |
| superfamily  |              | 331851       | 2      | 210 | 1.92852e-14 | 71.5303     | cl27030    | Ras superfamily           | -                         | -       |         |
| non-specific |              | 215587       | 1      | 123 | 1.98824e-11 | 62.3803     | PLN03118   | PLN03118                  | C                         | cl27030 |         |
| non-specific |              | 197555       | 12     | 139 | 1.59667e-09 | 55.9771     | smart00175 | RAB                       | -                         | cl27030 |         |
| non-specific |              | 272973       | 2      | 153 | 2.93511e-08 | 52.3741     | TIGR00231  | small_GTP                 | -                         | cl27769 |         |

|              |              |          |        |     |             |             |            |                           |       |         |
|--------------|--------------|----------|--------|-----|-------------|-------------|------------|---------------------------|-------|---------|
| LmasB3659    | superfamily  | 332590   | 2      | 153 | 2.93511e-08 | 52.3741     | cl27769    | GTP_EFTU superfamily      | -     | -       |
|              | non-specific | 206640   | 29     | 111 | 9.04954e-15 | 69.0218     | cd00154    | Rab                       | C     | cl21455 |
|              | superfamily  | 328724   | 29     | 111 | 9.04954e-15 | 69.0218     | cl21455    | P-loop_NTPase superfamily | C     | -       |
|              | non-specific | 312094   | 30     | 111 | 1.33125e-13 | 64.8342     | pfam08477  | Roc                       | C     | cl21455 |
|              | non-specific | 197555   | 29     | 111 | 4.11679e-13 | 64.8367     | smart00175 | RAB                       | C     | cl27030 |
|              | superfamily  | 331851   | 29     | 111 | 4.11679e-13 | 64.8367     | cl27030    | Ras superfamily           | C     | -       |
|              | non-specific | 215587   | 28     | 229 | 7.51779e-10 | 56.6023     | PLN03118   | PLN03118                  | -     | cl27030 |
|              | superfamily  | 331851   | 28     | 229 | 7.51779e-10 | 56.6023     | cl27030    | Ras superfamily           | -     | -       |
| LmasB3690    | non-specific | 178657   | 30     | 104 | 1.05351e-08 | 53.3939     | PLN03110   | PLN03110                  | C     | cl27030 |
|              | specific     | 224025   | 27     | 110 | 5.89643e-06 | 45.3367     | COG1100    | Gem1                      | C     | cl27030 |
|              | non-specific | 197555   | 657    | 811 | 1.11751e-31 | 121.076     | smart00175 | RAB                       | -     | cl27030 |
|              | superfamily  | 331851   | 657    | 811 | 1.11751e-31 | 121.076     | cl27030    | Ras superfamily           | -     | -       |
|              | specific     | 206640   | 657    | 815 | 8.91839e-31 | 118.327     | cd00154    | Rab                       | -     | cl21455 |
|              | superfamily  | 328724   | 657    | 815 | 8.91839e-31 | 118.327     | cl21455    | P-loop_NTPase superfamily | -     | -       |
|              | non-specific | 306559   | 659    | 820 | 6.64335e-29 | 112.982     | pfam00071  | Ras                       | -     | cl27030 |
|              | specific     | 238125   | 57     | 181 | 3.38114e-19 | 83.9722     | cd00204    | ANK                       | -     | cl02529 |
|              | superfamily  | 321973   | 57     | 181 | 3.38114e-19 | 83.9722     | cl02529    | ANK superfamily           | -     | -       |
|              | non-specific | 215587   | 647    | 811 | 3.21092e-16 | 78.1735     | PLN03118   | PLN03118                  | C     | cl27030 |
|              | specific     | 224025   | 656    | 829 | 6.71955e-15 | 74.6119     | COG1100    | Gem1                      | -     | cl27030 |
|              | specific     | 315466   | 67     | 152 | 1.31696e-12 | 63.9753     | pfam12796  | Ank_2                     | -     | cl26073 |
|              | superfamily  | 330894   | 67     | 152 | 1.31696e-12 | 63.9753     | cl26073    | Ank_2 superfamily         | -     | -       |
|              | non-specific | 272973   | 659    | 813 | 2.45867e-08 | 53.9149     | TIGR00231  | small_GTP                 | -     | cl27769 |
|              | superfamily  | 332590   | 659    | 813 | 2.45867e-08 | 53.9149     | cl27769    | GTP_EFTU superfamily      | -     | -       |
|              | LmasB3771    | specific | 223738 | 23  | 118         | 1.13963e-06 | 50.5931    | COG0666                   | ANKYR | N       |
| non-specific |              | 222939   | 61     | 163 | 1.2316e-05  | 48.3378     | PHA02878   | PHA02878                  | NC    | cl26073 |
| specific     |              | 197603   | 62     | 91  | 0.000110941 | 39.8786     | smart00248 | ANK                       | -     | cl02529 |
| non-specific |              | 206713   | 15     | 115 | 5.91634e-07 | 48.042      | cd04146    | RERG_RasL11_like          | N     | cl21455 |
| superfamily  |              | 328724   | 15     | 115 | 5.91634e-07 | 48.042      | cl21455    | P-loop_NTPase superfamily | N     | -       |
| non-specific |              | 306559   | 49     | 120 | 5.21016e-05 | 42.1056     | pfam00071  | Ras                       | N     | cl27030 |
| superfamily  |              | 331851   | 49     | 120 | 5.21016e-05 | 42.1056     | cl27030    | Ras superfamily           | N     | -       |

|              |              |              |        |     |             |             |            |                           |        |         |
|--------------|--------------|--------------|--------|-----|-------------|-------------|------------|---------------------------|--------|---------|
| LmicB0409    | non-specific | 197554       | 51     | 112 | 0.00910944  | 35.667      | smart00174 | RHO                       | NC     | cl27030 |
|              | non-specific | 206640       | 10     | 154 | 1.86559e-22 | 91.7486     | cd00154    | Rab                       | -      | cl21455 |
|              | superfamily  | 328724       | 10     | 154 | 1.86559e-22 | 91.7486     | cl21455    | P-loop_NTPase superfamily | -      | -       |
|              | non-specific | 197555       | 10     | 154 | 2.8399e-15  | 72.1555     | smart00175 | RAB                       | -      | cl27030 |
|              | superfamily  | 331851       | 10     | 154 | 2.8399e-15  | 72.1555     | cl27030    | Ras superfamily           | -      | -       |
|              | specific     | 224025       | 8      | 155 | 7.48916e-11 | 60.7447     | COG1100    | Gem1                      | -      | cl27030 |
|              | non-specific | 306559       | 10     | 154 | 1.69333e-10 | 58.6692     | pfam00071  | Ras                       | -      | cl27030 |
|              | non-specific | 178655       | 10     | 165 | 3.61656e-08 | 53.0212     | PLN03108   | PLN03108                  | -      | cl27030 |
|              | non-specific | 272973       | 7      | 149 | 1.38181e-06 | 47.3665     | TIGR00231  | small_GTP                 | -      | cl27769 |
|              | superfamily  | 332590       | 7      | 149 | 1.38181e-06 | 47.3665     | cl27769    | GTP_EFTU superfamily      | -      | -       |
| LmicB0828    | non-specific | 133330       | 78     | 146 | 1.83173e-06 | 47.012      | cd04130    | Wrch_1                    | NC     | cl21455 |
|              | superfamily  | 328724       | 78     | 146 | 1.83173e-06 | 47.012      | cl21455    | P-loop_NTPase superfamily | NC     | -       |
|              | non-specific | 312094       | 78     | 135 | 0.000375935 | 39.0258     | pfam08477  | Roc                       | N      | cl21455 |
|              | non-specific | 197554       | 78     | 143 | 0.00377625  | 37.2078     | smart00174 | RHO                       | NC     | cl27030 |
|              | superfamily  | 331851       | 78     | 143 | 0.00377625  | 37.2078     | cl27030    | Ras superfamily           | NC     | -       |
| LMlv2_0854   | non-specific | 206640       | 10     | 154 | 1.44297e-22 | 92.1338     | cd00154    | Rab                       | -      | cl21455 |
|              | superfamily  | 328724       | 10     | 154 | 1.44297e-22 | 92.1338     | cl21455    | P-loop_NTPase superfamily | -      | -       |
|              | non-specific | 197555       | 10     | 154 | 2.70227e-15 | 72.1555     | smart00175 | RAB                       | -      | cl27030 |
|              | superfamily  | 331851       | 10     | 154 | 2.70227e-15 | 72.1555     | cl27030    | Ras superfamily           | -      | -       |
|              | specific     | 224025       | 8      | 155 | 6.25008e-11 | 61.1299     | COG1100    | Gem1                      | -      | cl27030 |
|              | non-specific | 306559       | 10     | 154 | 1.49293e-10 | 58.6692     | pfam00071  | Ras                       | -      | cl27030 |
|              | non-specific | 178655       | 10     | 165 | 3.61656e-08 | 53.0212     | PLN03108   | PLN03108                  | -      | cl27030 |
|              | non-specific | 272973       | 7      | 149 | 1.28033e-06 | 47.3665     | TIGR00231  | small_GTP                 | -      | cl27769 |
|              | superfamily  | 332590       | 7      | 149 | 1.28033e-06 | 47.3665     | cl27769    | GTP_EFTU superfamily      | -      | -       |
|              | LMlv2_2158   | non-specific | 133330 | 78  | 146         | 2.43933e-06 | 47.012     | cd04130                   | Wrch_1 | NC      |
| superfamily  |              | 328724       | 78     | 146 | 2.43933e-06 | 47.012      | cl21455    | P-loop_NTPase superfamily | NC     | -       |
| non-specific |              | 312094       | 78     | 135 | 0.000314262 | 39.7962     | pfam08477  | Roc                       | N      | cl21455 |
| non-specific |              | 197554       | 78     | 143 | 0.00398451  | 37.593      | smart00174 | RHO                       | NC     | cl27030 |
| superfamily  |              | 331851       | 78     | 143 | 0.00398451  | 37.593      | cl27030    | Ras superfamily           | NC     | -       |
| Lmo0615      | non-specific | 206640       | 70     | 230 | 1.47064e-13 | 67.8662     | cd00154    | Rab                       | -      | cl21455 |



|          |              |        |     |     |             |         |            |                           |   |         |
|----------|--------------|--------|-----|-----|-------------|---------|------------|---------------------------|---|---------|
|          | superfamily  | 328724 | 70  | 230 | 1.47064e-13 | 67.8662 | cl21455    | P-loop_NTPase superfamily | - | -       |
|          | non-specific | 312094 | 72  | 189 | 8.28966e-12 | 61.7526 | pfam08477  | Roc                       | - | cl21455 |
|          | non-specific | 197555 | 66  | 219 | 7.9363e-08  | 51.3547 | smart00175 | RAB                       | - | cl27030 |
|          | superfamily  | 331851 | 66  | 219 | 7.9363e-08  | 51.3547 | cl27030    | Ras superfamily           | - | -       |
|          | specific     | 224025 | 66  | 263 | 1.61891e-07 | 51.4999 | COG1100    | Gem1                      | - | cl27030 |
|          | non-specific | 178655 | 65  | 224 | 5.21143e-07 | 49.9396 | PLN03108   | PLN03108                  | C | cl27030 |
|          | non-specific | 311394 | 232 | 305 | 0.00273189  | 38.3649 | pfam07426  | Dynactin_p22              | N | cl06456 |
|          | superfamily  | 311394 | 232 | 305 | 0.00273189  | 38.3649 | cl06456    | Dynactin_p22 superfamily  | N | -       |
| Lnau0521 | specific     | 224025 | 17  | 205 | 3.74281e-10 | 59.2039 | COG1100    | Gem1                      | - | cl27030 |
|          | superfamily  | 331851 | 17  | 205 | 3.74281e-10 | 59.2039 | cl27030    | Ras superfamily           | - | -       |
|          | specific     | 206648 | 20  | 182 | 6.52858e-08 | 51.3032 | cd00882    | Ras_like_GTPase           | - | cl21455 |
|          | superfamily  | 328724 | 20  | 182 | 6.52858e-08 | 51.3032 | cl21455    | P-loop_NTPase superfamily | - | -       |
|          | non-specific | 312094 | 19  | 130 | 2.48019e-07 | 48.6558 | pfam08477  | Roc                       | - | cl21455 |
|          | non-specific | 197554 | 79  | 178 | 8.30234e-06 | 45.6822 | smart00174 | RHO                       | N | cl27030 |
|          | non-specific | 272973 | 16  | 131 | 2.95239e-05 | 43.5145 | TIGR00231  | small_GTP                 | C | cl27769 |
|          | superfamily  | 332590 | 16  | 131 | 2.95239e-05 | 43.5145 | cl27769    | GTP_EFTU superfamily      | C | -       |
| Lnau1544 | non-specific | 206640 | 8   | 174 | 2.1802e-18  | 80.963  | cd00154    | Rab                       | - | cl21455 |
|          | superfamily  | 328724 | 8   | 174 | 2.1802e-18  | 80.963  | cl21455    | P-loop_NTPase superfamily | - | -       |
|          | non-specific | 306559 | 8   | 174 | 7.8199e-13  | 65.6028 | pfam00071  | Ras                       | - | cl27030 |
|          | superfamily  | 331851 | 8   | 174 | 7.8199e-13  | 65.6028 | cl27030    | Ras superfamily           | - | -       |
|          | non-specific | 197555 | 9   | 174 | 1.14832e-11 | 62.1403 | smart00175 | RAB                       | - | cl27030 |
|          | specific     | 224025 | 8   | 209 | 3.61659e-09 | 56.1223 | COG1100    | Gem1                      | - | cl27030 |
|          | non-specific | 272973 | 7   | 169 | 0.00613417  | 36.9662 | TIGR00231  | small_GTP                 | - | cl27769 |
|          | superfamily  | 332590 | 7   | 169 | 0.00613417  | 36.9662 | cl27769    | GTP_EFTU superfamily      | - | -       |
| Loas0638 | non-specific | 206641 | 54  | 174 | 4.22263e-33 | 116.875 | cd00157    | Rho                       | - | cl21455 |
|          | superfamily  | 328724 | 54  | 174 | 4.22263e-33 | 116.875 | cl21455    | P-loop_NTPase superfamily | - | -       |
|          | non-specific | 197554 | 54  | 174 | 2.78069e-28 | 104.618 | smart00174 | RHO                       | - | cl27030 |
|          | superfamily  | 331851 | 54  | 174 | 2.78069e-28 | 104.618 | cl27030    | Ras superfamily           | - | -       |
|          | non-specific | 306559 | 57  | 195 | 8.27403e-17 | 74.0772 | pfam00071  | Ras                       | - | cl27030 |
|          | specific     | 224025 | 81  | 198 | 4.14171e-07 | 48.8035 | COG1100    | Gem1                      | N | cl27030 |

|          |              |        |     |     |             |         |            |                           |   |         |
|----------|--------------|--------|-----|-----|-------------|---------|------------|---------------------------|---|---------|
| Loas2281 | non-specific | 206640 | 50  | 204 | 5.95605e-07 | 49.7618 | cd00154    | Rab                       | - | cl21455 |
|          | superfamily  | 328724 | 50  | 204 | 5.95605e-07 | 49.7618 | cl21455    | P-loop_NTPase superfamily | - | -       |
|          | non-specific | 306559 | 50  | 207 | 1.78143e-05 | 45.5724 | pfam00071  | Ras                       | - | cl27030 |
|          | superfamily  | 331851 | 50  | 207 | 1.78143e-05 | 45.5724 | cl27030    | Ras superfamily           | - | -       |
|          | non-specific | 214541 | 111 | 196 | 0.000495147 | 41.3877 | smart00173 | RAS                       | N | cl27030 |
|          | non-specific | 240385 | 45  | 178 | 0.00543166  | 38.6916 | PTZ00369   | PTZ00369                  | C | cl27030 |
| Lpar0348 | non-specific | 206640 | 16  | 174 | 9.65526e-14 | 67.8662 | cd00154    | Rab                       | - | cl21455 |
|          | superfamily  | 328724 | 16  | 174 | 9.65526e-14 | 67.8662 | cl21455    | P-loop_NTPase superfamily | - | -       |
|          | non-specific | 312094 | 16  | 134 | 2.49731e-06 | 45.5742 | pfam08477  | Roc                       | - | cl21455 |
|          | specific     | 224025 | 11  | 134 | 0.000366318 | 41.0995 | COG1100    | Gem1                      | C | cl27030 |
|          | superfamily  | 331851 | 11  | 134 | 0.000366318 | 41.0995 | cl27030    | Ras superfamily           | C | -       |
| Lpar0942 | specific     | 206640 | 11  | 171 | 4.98086e-50 | 163.011 | cd00154    | Rab                       | - | cl21455 |
|          | superfamily  | 328724 | 11  | 171 | 4.98086e-50 | 163.011 | cl21455    | P-loop_NTPase superfamily | - | -       |
|          | non-specific | 197555 | 11  | 174 | 3.55297e-45 | 150.736 | smart00175 | RAB                       | - | cl27030 |
|          | superfamily  | 331851 | 11  | 174 | 3.55297e-45 | 150.736 | cl27030    | Ras superfamily           | - | -       |
|          | non-specific | 306559 | 12  | 174 | 1.0389e-40  | 139.176 | pfam00071  | Ras                       | - | cl27030 |
|          | non-specific | 178655 | 11  | 174 | 4.15461e-26 | 102.327 | PLN03108   | PLN03108                  | C | cl27030 |
|          | specific     | 224025 | 7   | 174 | 1.07697e-19 | 85.3975 | COG1100    | Gem1                      | - | cl27030 |
|          | non-specific | 272973 | 11  | 162 | 1.4629e-11  | 61.6189 | TIGR00231  | small_GTP                 | - | cl27769 |
| Lpar0973 | superfamily  | 332590 | 11  | 162 | 1.4629e-11  | 61.6189 | cl27769    | GTP_EFTU superfamily      | - | -       |
|          | specific     | 206640 | 30  | 189 | 2.72624e-45 | 147.603 | cd00154    | Rab                       | - | cl21455 |
|          | superfamily  | 328724 | 30  | 189 | 2.72624e-45 | 147.603 | cl21455    | P-loop_NTPase superfamily | - | -       |
|          | non-specific | 306559 | 31  | 188 | 1.07725e-41 | 138.791 | pfam00071  | Ras                       | - | cl27030 |
|          | superfamily  | 331851 | 31  | 188 | 1.07725e-41 | 138.791 | cl27030    | Ras superfamily           | - | -       |
|          | non-specific | 197555 | 30  | 189 | 2.88719e-39 | 132.632 | smart00175 | RAB                       | - | cl27030 |
|          | non-specific | 178655 | 30  | 186 | 1.51986e-22 | 90.7708 | PLN03108   | PLN03108                  | C | cl27030 |
|          | specific     | 224025 | 28  | 215 | 1.46049e-19 | 83.0863 | COG1100    | Gem1                      | - | cl27030 |
|          | non-specific | 272973 | 30  | 184 | 2.23505e-15 | 70.4785 | TIGR00231  | small_GTP                 | - | cl27769 |
|          | superfamily  | 332590 | 30  | 184 | 2.23505e-15 | 70.4785 | cl27769    | GTP_EFTU superfamily      | - | -       |
| Lpar1023 | non-specific | 206640 | 248 | 409 | 5.96032e-23 | 94.445  | cd00154    | Rab                       | - | cl21455 |

|          |              |        |     |     |             |         |            |                           |    |         |
|----------|--------------|--------|-----|-----|-------------|---------|------------|---------------------------|----|---------|
|          | superfamily  | 328724 | 248 | 409 | 5.96032e-23 | 94.445  | cl21455    | P-loop_NTPase superfamily | -  | -       |
|          | non-specific | 306559 | 248 | 402 | 5.2202e-21  | 89.1    | pfam00071  | Ras                       | -  | cl27030 |
|          | superfamily  | 331851 | 248 | 402 | 5.2202e-21  | 89.1    | cl27030    | Ras superfamily           | -  | -       |
|          | non-specific | 197555 | 248 | 401 | 9.71041e-19 | 82.5559 | smart00175 | RAB                       | -  | cl27030 |
| Lpar1509 | non-specific | 178655 | 315 | 395 | 7.37273e-12 | 64.192  | PLN03108   | PLN03108                  | NC | cl27030 |
|          | specific     | 206640 | 7   | 161 | 1.30082e-35 | 126.417 | cd00154    | Rab                       | -  | cl21455 |
|          | superfamily  | 328724 | 7   | 161 | 1.30082e-35 | 126.417 | cl21455    | P-loop_NTPase superfamily | -  | -       |
|          | non-specific | 197555 | 7   | 161 | 4.47575e-27 | 104.127 | smart00175 | RAB                       | -  | cl27030 |
|          | superfamily  | 331851 | 7   | 161 | 4.47575e-27 | 104.127 | cl27030    | Ras superfamily           | -  | -       |
|          | non-specific | 306559 | 8   | 164 | 3.63967e-26 | 101.812 | pfam00071  | Ras                       | -  | cl27030 |
|          | specific     | 224025 | 6   | 194 | 1.50275e-18 | 82.7011 | COG1100    | Gem1                      | -  | cl27030 |
|          | non-specific | 272973 | 6   | 159 | 2.11565e-16 | 75.1009 | TIGR00231  | small_GTP                 | -  | cl27769 |
|          | superfamily  | 332590 | 6   | 159 | 2.11565e-16 | 75.1009 | cl27769    | GTP_EFTU superfamily      | -  | -       |
| Lqua0234 | non-specific | 178657 | 7   | 159 | 1.39635e-15 | 74.1946 | PLN03110   | PLN03110                  | C  | cl27030 |
|          | specific     | 206640 | 358 | 524 | 4.18843e-45 | 156.077 | cd00154    | Rab                       | -  | cl21455 |
|          | superfamily  | 328724 | 358 | 524 | 4.18843e-45 | 156.077 | cl21455    | P-loop_NTPase superfamily | -  | -       |
|          | non-specific | 197555 | 361 | 513 | 1.19847e-41 | 146.884 | smart00175 | RAB                       | -  | cl27030 |
|          | superfamily  | 331851 | 361 | 513 | 1.19847e-41 | 146.884 | cl27030    | Ras superfamily           | -  | -       |
|          | non-specific | 306559 | 358 | 524 | 4.26801e-39 | 139.946 | pfam00071  | Ras                       | -  | cl27030 |
|          | non-specific | 178655 | 355 | 513 | 3.96826e-28 | 111.572 | PLN03108   | PLN03108                  | C  | cl27030 |
|          | specific     | 224025 | 353 | 472 | 2.24823e-22 | 95.4127 | COG1100    | Gem1                      | C  | cl27030 |
|          | non-specific | 272973 | 356 | 515 | 1.13457e-12 | 65.8561 | TIGR00231  | small_GTP                 | -  | cl27769 |
|          | superfamily  | 332590 | 356 | 515 | 1.13457e-12 | 65.8561 | cl27769    | GTP_EFTU superfamily      | -  | -       |
| Lqua1848 | non-specific | 206640 | 22  | 170 | 2.09922e-14 | 70.1774 | cd00154    | Rab                       | -  | cl21455 |
|          | superfamily  | 328724 | 22  | 170 | 2.09922e-14 | 70.1774 | cl21455    | P-loop_NTPase superfamily | -  | -       |
|          | specific     | 224025 | 18  | 220 | 4.25792e-13 | 67.6783 | COG1100    | Gem1                      | -  | cl27030 |
|          | superfamily  | 331851 | 18  | 220 | 4.25792e-13 | 67.6783 | cl27030    | Ras superfamily           | -  | -       |
|          | non-specific | 312094 | 24  | 141 | 9.93353e-12 | 60.9822 | pfam08477  | Roc                       | -  | cl21455 |
|          | non-specific | 197555 | 18  | 170 | 1.33322e-10 | 59.4439 | smart00175 | RAB                       | -  | cl27030 |
|          | non-specific | 178655 | 17  | 209 | 3.87334e-06 | 47.2432 | PLN03108   | PLN03108                  | -  | cl27030 |

|           |              |        |     |     |             |         |            |                           |   |         |
|-----------|--------------|--------|-----|-----|-------------|---------|------------|---------------------------|---|---------|
| Lquin0486 | non-specific | 272973 | 22  | 181 | 2.6817e-05  | 43.8997 | TIGR00231  | small_GTP                 | - | cl27769 |
|           | superfamily  | 332590 | 22  | 181 | 2.6817e-05  | 43.8997 | cl27769    | GTP_EFTU superfamily      | - | -       |
|           | specific     | 206648 | 710 | 861 | 5.08673e-17 | 79.0375 | cd00882    | Ras_like_GTPase           | - | cl21455 |
|           | superfamily  | 328724 | 710 | 861 | 5.08673e-17 | 79.0375 | cl21455    | P-loop_NTPase superfamily | - | -       |
|           | non-specific | 306559 | 708 | 861 | 3.9229e-15  | 73.692  | pfam00071  | Ras                       | - | cl27030 |
|           | superfamily  | 331851 | 708 | 861 | 3.9229e-15  | 73.692  | cl27030    | Ras superfamily           | - | -       |
|           | non-specific | 197555 | 708 | 861 | 1.53865e-11 | 63.2959 | smart00175 | RAB                       | - | cl27030 |
| Lquin0849 | specific     | 224025 | 708 | 862 | 1.93469e-07 | 52.6555 | COG1100    | Gem1                      | - | cl27030 |
|           | non-specific | 272973 | 708 | 856 | 8.76304e-07 | 49.6777 | TIGR00231  | small_GTP                 | - | cl27769 |
|           | superfamily  | 332590 | 708 | 856 | 8.76304e-07 | 49.6777 | cl27769    | GTP_EFTU superfamily      | - | -       |
|           | non-specific | 178655 | 709 | 860 | 0.00441857  | 39.5392 | PLN03108   | PLN03108                  | C | cl27030 |
|           | specific     | 224025 | 11  | 126 | 2.4508e-14  | 69.9895 | COG1100    | Gem1                      | C | cl27030 |
|           | superfamily  | 331851 | 11  | 126 | 2.4508e-14  | 69.9895 | cl27030    | Ras superfamily           | C | -       |
|           | non-specific | 206640 | 14  | 161 | 3.64814e-14 | 67.8662 | cd00154    | Rab                       | - | cl21455 |
| Lquin3026 | superfamily  | 328724 | 14  | 161 | 3.64814e-14 | 67.8662 | cl21455    | P-loop_NTPase superfamily | - | -       |
|           | non-specific | 306559 | 15  | 160 | 1.94848e-12 | 63.2916 | pfam00071  | Ras                       | - | cl27030 |
|           | non-specific | 197555 | 14  | 176 | 5.12597e-10 | 56.7475 | smart00175 | RAB                       | - | cl27030 |
|           | non-specific | 272973 | 14  | 127 | 2.75023e-07 | 48.9073 | TIGR00231  | small_GTP                 | C | cl27769 |
|           | superfamily  | 332590 | 14  | 127 | 2.75023e-07 | 48.9073 | cl27769    | GTP_EFTU superfamily      | C | -       |
|           | non-specific | 178657 | 13  | 167 | 1.00262e-05 | 45.3047 | PLN03110   | PLN03110                  | C | cl27030 |
|           | specific     | 206640 | 16  | 175 | 2.26932e-35 | 125.261 | cd00154    | Rab                       | - | cl21455 |
| Lrow0101  | superfamily  | 328724 | 16  | 175 | 2.26932e-35 | 125.261 | cl21455    | P-loop_NTPase superfamily | - | -       |
|           | non-specific | 306559 | 17  | 183 | 1.31223e-31 | 115.294 | pfam00071  | Ras                       | - | cl27030 |
|           | superfamily  | 331851 | 17  | 183 | 1.31223e-31 | 115.294 | cl27030    | Ras superfamily           | - | -       |
|           | non-specific | 197555 | 17  | 183 | 2.50355e-28 | 106.823 | smart00175 | RAB                       | - | cl27030 |
|           | non-specific | 178655 | 17  | 175 | 3.98911e-18 | 80.7556 | PLN03108   | PLN03108                  | C | cl27030 |
|           | specific     | 224025 | 11  | 219 | 6.66529e-12 | 63.8263 | COG1100    | Gem1                      | - | cl27030 |
|           | non-specific | 272973 | 17  | 172 | 3.41447e-07 | 48.9073 | TIGR00231  | small_GTP                 | - | cl27769 |
| Lrow0101  | superfamily  | 332590 | 17  | 172 | 3.41447e-07 | 48.9073 | cl27769    | GTP_EFTU superfamily      | - | -       |
|           | specific     | 206648 | 7   | 153 | 6.99587e-07 | 48.2216 | cd00882    | Ras_like_GTPase           | - | cl21455 |

|          |              |        |    |     |             |         |            |                           |   |         |
|----------|--------------|--------|----|-----|-------------|---------|------------|---------------------------|---|---------|
|          | superfamily  | 328724 | 7  | 153 | 6.99587e-07 | 48.2216 | cl21455    | P-loop_NTPase superfamily | - | -       |
|          | non-specific | 312094 | 4  | 112 | 5.75398e-06 | 44.4186 | pfam08477  | Roc                       | - | cl21455 |
|          | specific     | 224025 | 2  | 157 | 1.47705e-05 | 45.3367 | COG1100    | Gem1                      | - | cl27030 |
|          | superfamily  | 331851 | 2  | 157 | 1.47705e-05 | 45.3367 | cl27030    | Ras superfamily           | - | -       |
|          | non-specific | 215587 | 4  | 67  | 7.43489e-05 | 43.1203 | PLN03118   | PLN03118                  | C | cl27030 |
|          | non-specific | 197555 | 4  | 54  | 0.000240811 | 40.9543 | smart00175 | RAB                       | C | cl27030 |
| Lrow0422 | specific     | 206648 | 7  | 156 | 3.41034e-14 | 69.0223 | cd00882    | Ras_like_GTPase           | - | cl21455 |
|          | superfamily  | 328724 | 7  | 156 | 3.41034e-14 | 69.0223 | cl21455    | P-loop_NTPase superfamily | - | -       |
|          | non-specific | 312094 | 5  | 120 | 1.95207e-10 | 57.1302 | pfam08477  | Roc                       | - | cl21455 |
|          | non-specific | 197555 | 4  | 150 | 2.12797e-08 | 52.5103 | smart00175 | RAB                       | - | cl27030 |
|          | superfamily  | 331851 | 4  | 150 | 2.12797e-08 | 52.5103 | cl27030    | Ras superfamily           | - | -       |
|          | non-specific | 178655 | 4  | 125 | 9.87121e-06 | 45.7024 | PLN03108   | PLN03108                  | C | cl27030 |
|          | non-specific | 272973 | 4  | 152 | 4.41689e-05 | 43.1294 | TIGR00231  | small_GTP                 | - | cl27769 |
|          | superfamily  | 332590 | 4  | 152 | 4.41689e-05 | 43.1294 | cl27769    | GTP_EFTU superfamily      | - | -       |
|          | specific     | 224025 | 2  | 144 | 0.00104362  | 39.5587 | COG1100    | Gem1                      | C | cl27030 |
| Lrow0424 | specific     | 206648 | 24 | 164 | 2.10906e-16 | 75.1855 | cd00882    | Ras_like_GTPase           | - | cl21455 |
|          | superfamily  | 328724 | 24 | 164 | 2.10906e-16 | 75.1855 | cl21455    | P-loop_NTPase superfamily | - | -       |
|          | non-specific | 312094 | 24 | 123 | 1.25251e-09 | 54.819  | pfam08477  | Roc                       | - | cl21455 |
|          | specific     | 224025 | 12 | 129 | 3.3897e-07  | 50.3443 | COG1100    | Gem1                      | C | cl27030 |
|          | superfamily  | 331851 | 12 | 129 | 3.3897e-07  | 50.3443 | cl27030    | Ras superfamily           | C | -       |
|          | non-specific | 272973 | 15 | 132 | 1.31748e-06 | 47.3665 | TIGR00231  | small_GTP                 | C | cl27769 |
|          | superfamily  | 332590 | 15 | 132 | 1.31748e-06 | 47.3665 | cl27769    | GTP_EFTU superfamily      | C | -       |
|          | non-specific | 235392 | 80 | 164 | 0.000590832 | 41.2495 | PRK05291   | trmE                      | N | cl26334 |
|          | superfamily  | 331155 | 80 | 164 | 0.000590832 | 41.2495 | cl26334    | MnmE_helical superfamily  | N | -       |
|          | non-specific | 128473 | 22 | 124 | 0.00196446  | 38.8391 | smart00176 | RAN                       | C | cl27030 |
| Lrow1057 | non-specific | 306559 | 16 | 175 | 1.46006e-36 | 128.005 | pfam00071  | Ras                       | - | cl27030 |
|          | superfamily  | 331851 | 16 | 175 | 1.46006e-36 | 128.005 | cl27030    | Ras superfamily           | - | -       |
|          | specific     | 206640 | 15 | 172 | 9.88558e-36 | 125.646 | cd00154    | Rab                       | - | cl21455 |
|          | superfamily  | 328724 | 15 | 172 | 9.88558e-36 | 125.646 | cl21455    | P-loop_NTPase superfamily | - | -       |
|          | non-specific | 197555 | 15 | 175 | 2.94338e-35 | 124.543 | smart00175 | RAB                       | - | cl27030 |

|           |              |        |     |     |             |         |            |                           |    |         |
|-----------|--------------|--------|-----|-----|-------------|---------|------------|---------------------------|----|---------|
|           | non-specific | 178655 | 14  | 175 | 1.32512e-22 | 92.6968 | PLN03108   | PLN03108                  | C  | cl27030 |
|           | specific     | 224025 | 15  | 217 | 1.02534e-16 | 76.9231 | COG1100    | Gem1                      | -  | cl27030 |
|           | non-specific | 272973 | 15  | 167 | 1.45325e-10 | 58.5373 | TIGR00231  | small_GTP                 | -  | cl27769 |
|           | superfamily  | 332590 | 15  | 167 | 1.45325e-10 | 58.5373 | cl27769    | GTP_EFTU superfamily      | -  | -       |
| Lrub0535  | non-specific | 206703 | 2   | 113 | 6.06376e-05 | 42.8054 | cd04131    | Rnd                       | C  | cl21455 |
|           | superfamily  | 328724 | 2   | 113 | 6.06376e-05 | 42.8054 | cl21455    | P-loop_NTPase superfamily | C  | -       |
|           | non-specific | 272973 | 1   | 133 | 0.00273125  | 37.7366 | TIGR00231  | small_GTP                 | -  | cl27769 |
|           | superfamily  | 332590 | 1   | 133 | 0.00273125  | 37.7366 | cl27769    | GTP_EFTU superfamily      | -  | -       |
| Lrub2218  | non-specific | 206640 | 44  | 177 | 0.00963462  | 35.1243 | cd00154    | Rab                       | -  | cl21455 |
|           | superfamily  | 328724 | 44  | 177 | 0.00963462  | 35.1243 | cl21455    | P-loop_NTPase superfamily | -  | -       |
| Lsain0944 | specific     | 206640 | 4   | 157 | 1.07096e-26 | 102.919 | cd00154    | Rab                       | -  | cl21455 |
|           | superfamily  | 328724 | 4   | 157 | 1.07096e-26 | 102.919 | cl21455    | P-loop_NTPase superfamily | -  | -       |
|           | non-specific | 197555 | 4   | 157 | 1.22858e-22 | 92.1859 | smart00175 | RAB                       | -  | cl27030 |
|           | superfamily  | 331851 | 4   | 157 | 1.22858e-22 | 92.1859 | cl27030    | Ras superfamily           | -  | -       |
|           | specific     | 312094 | 5   | 116 | 3.3612e-22  | 89.4869 | pfam08477  | Roc                       | -  | cl21455 |
|           | specific     | 224025 | 1   | 186 | 5.9006e-17  | 78.0787 | COG1100    | Gem1                      | -  | cl27030 |
|           | non-specific | 178657 | 4   | 155 | 9.19718e-17 | 77.6614 | PLN03110   | PLN03110                  | C  | cl27030 |
|           | non-specific | 272973 | 4   | 155 | 7.69006e-14 | 68.1673 | TIGR00231  | small_GTP                 | -  | cl27769 |
|           | superfamily  | 332590 | 4   | 155 | 7.69006e-14 | 68.1673 | cl27769    | GTP_EFTU superfamily      | -  | -       |
|           | non-specific | 316146 | 251 | 310 | 0.00203257  | 39.0834 | pfam13593  | SBF_like                  | NC | cl19217 |
|           | superfamily  | 327523 | 251 | 310 | 0.00203257  | 39.0834 | cl19217    | SBF superfamily           | NC | -       |
| Lsain1402 | specific     | 206640 | 35  | 192 | 5.63133e-49 | 161.085 | cd00154    | Rab                       | -  | cl21455 |
|           | superfamily  | 328724 | 35  | 192 | 5.63133e-49 | 161.085 | cl21455    | P-loop_NTPase superfamily | -  | -       |
|           | non-specific | 197555 | 35  | 195 | 2.44898e-46 | 154.203 | smart00175 | RAB                       | -  | cl27030 |
|           | superfamily  | 331851 | 35  | 195 | 2.44898e-46 | 154.203 | cl27030    | Ras superfamily           | -  | -       |
|           | non-specific | 306559 | 36  | 195 | 1.53871e-43 | 146.88  | pfam00071  | Ras                       | -  | cl27030 |
|           | non-specific | 178657 | 25  | 195 | 4.53587e-31 | 116.181 | PLN03110   | PLN03110                  | -  | cl27030 |
|           | specific     | 224025 | 31  | 231 | 1.24012e-16 | 77.3083 | COG1100    | Gem1                      | -  | cl27030 |
|           | non-specific | 272973 | 35  | 188 | 5.89501e-15 | 71.2489 | TIGR00231  | small_GTP                 | -  | cl27769 |
|           | superfamily  | 332590 | 35  | 188 | 5.89501e-15 | 71.2489 | cl27769    | GTP_EFTU superfamily      | -  | -       |

|              |              |        |     |             |             |            |                 |                           |         |         |
|--------------|--------------|--------|-----|-------------|-------------|------------|-----------------|---------------------------|---------|---------|
| Lsan1400     | non-specific | 306559 | 10  | 159         | 1.02477e-22 | 90.2555    | pfam00071       | Ras                       | -       | cl27030 |
|              | superfamily  | 331851 | 10  | 159         | 1.02477e-22 | 90.2555    | cl27030         | Ras superfamily           | -       | -       |
|              | non-specific | 206640 | 10  | 151         | 2.39306e-21 | 86.3558    | cd00154         | Rab                       | -       | cl21455 |
|              | superfamily  | 328724 | 10  | 151         | 2.39306e-21 | 86.3558    | cl21455         | P-loop_NTPase superfamily | -       | -       |
|              | non-specific | 197555 | 10  | 165         | 7.64528e-21 | 85.2523    | smart00175      | RAB                       | -       | cl27030 |
|              | non-specific | 178657 | 10  | 122         | 1.31106e-08 | 53.0087    | PLN03110        | PLN03110                  | C       | cl27030 |
|              | specific     | 224025 | 10  | 197         | 1.17418e-07 | 50.3443    | COG1100         | Gem1                      | -       | cl27030 |
| Lsan2168     | specific     | 206640 | 8   | 161         | 6.44058e-25 | 98.297     | cd00154         | Rab                       | -       | cl21455 |
|              | superfamily  | 328724 | 8   | 161         | 6.44058e-25 | 98.297     | cl21455         | P-loop_NTPase superfamily | -       | -       |
|              | non-specific | 312094 | 9   | 120         | 9.19843e-22 | 88.3313    | pfam08477       | Roc                       | -       | cl21455 |
|              | non-specific | 197555 | 8   | 161         | 9.43877e-19 | 81.7855    | smart00175      | RAB                       | -       | cl27030 |
|              | superfamily  | 331851 | 8   | 161         | 9.43877e-19 | 81.7855    | cl27030         | Ras superfamily           | -       | -       |
|              | specific     | 224025 | 5   | 171         | 2.71443e-14 | 70.7599    | COG1100         | Gem1                      | -       | cl27030 |
|              | non-specific | 178657 | 8   | 120         | 5.18428e-12 | 64.1794    | PLN03110        | PLN03110                  | C       | cl27030 |
| Lsan3135     | non-specific | 272973 | 8   | 159         | 1.19648e-11 | 62.0041    | TIGR00231       | small_GTP                 | -       | cl27769 |
|              | superfamily  | 332590 | 8   | 159         | 1.19648e-11 | 62.0041    | cl27769         | GTP_EFTU superfamily      | -       | -       |
|              | specific     | 206640 | 35  | 192         | 1.16272e-45 | 152.225    | cd00154         | Rab                       | -       | cl21455 |
|              | superfamily  | 328724 | 35  | 192         | 1.16272e-45 | 152.225    | cl21455         | P-loop_NTPase superfamily | -       | -       |
|              | non-specific | 197555 | 35  | 195         | 8.85022e-44 | 147.655    | smart00175      | RAB                       | -       | cl27030 |
|              | superfamily  | 331851 | 35  | 195         | 8.85022e-44 | 147.655    | cl27030         | Ras superfamily           | -       | -       |
|              | non-specific | 306559 | 36  | 195         | 1.66546e-40 | 139.176    | pfam00071       | Ras                       | -       | cl27030 |
| Lspi0161     | non-specific | 178657 | 25  | 203         | 3.06553e-29 | 111.559    | PLN03110        | PLN03110                  | -       | cl27030 |
|              | specific     | 224025 | 31  | 230         | 2.65831e-16 | 76.5379    | COG1100         | Gem1                      | -       | cl27030 |
|              | non-specific | 272973 | 36  | 190         | 6.02001e-12 | 62.7745    | TIGR00231       | small_GTP                 | -       | cl27769 |
|              | superfamily  | 332590 | 36  | 190         | 6.02001e-12 | 62.7745    | cl27769         | GTP_EFTU superfamily      | -       | -       |
|              | specific     | 206640 | 339 | 495         | 2.93494e-38 | 139.128    | cd00154         | Rab                       | -       | cl21455 |
|              | superfamily  | 328724 | 339 | 495         | 2.93494e-38 | 139.128    | cl21455         | P-loop_NTPase superfamily | -       | -       |
|              | non-specific | 306559 | 341 | 496         | 7.10829e-37 | 135.709    | pfam00071       | Ras                       | -       | cl27030 |
| superfamily  | 331851       | 341    | 496 | 7.10829e-37 | 135.709     | cl27030    | Ras superfamily | -                         | -       |         |
| non-specific | 197555       | 341    | 496 | 1.19158e-31 | 120.691     | smart00175 | RAB             | -                         | cl27030 |         |

|          |              |        |     |     |             |         |            |                           |   |         |
|----------|--------------|--------|-----|-----|-------------|---------|------------|---------------------------|---|---------|
|          | specific     | 206640 | 567 | 716 | 5.49847e-30 | 115.631 | cd00154    | Rab                       | - | cl21455 |
|          | superfamily  | 328724 | 567 | 716 | 5.49847e-30 | 115.631 | cl21455    | P-loop_NTPase superfamily | - | -       |
|          | non-specific | 306559 | 577 | 716 | 1.55115e-25 | 103.352 | pfam00071  | Ras                       | - | cl27030 |
|          | superfamily  | 331851 | 577 | 716 | 1.55115e-25 | 103.352 | cl27030    | Ras superfamily           | - | -       |
|          | non-specific | 197555 | 577 | 716 | 1.01576e-24 | 101.045 | smart00175 | RAB                       | - | cl27030 |
|          | non-specific | 178655 | 342 | 510 | 5.8167e-20  | 88.8448 | PLN03108   | PLN03108                  | - | cl27030 |
|          | non-specific | 178655 | 590 | 723 | 1.39242e-14 | 73.0516 | PLN03108   | PLN03108                  | - | cl27030 |
|          | specific     | 224025 | 337 | 510 | 1.46211e-11 | 64.5967 | COG1100    | Gem1                      | - | cl27030 |
|          | non-specific | 272973 | 339 | 490 | 7.10405e-09 | 55.4557 | TIGR00231  | small_GTP                 | - | cl27769 |
|          | superfamily  | 332590 | 339 | 490 | 7.10405e-09 | 55.4557 | cl27769    | GTP_EFTU superfamily      | - | -       |
|          | non-specific | 128780 | 48  | 95  | 1.68115e-05 | 42.6073 | smart00504 | Ubox                      | C | cl17238 |
|          | superfamily  | 327409 | 48  | 95  | 1.68115e-05 | 42.6073 | cl17238    | RING_Ubox superfamily     | C | -       |
|          | non-specific | 319569 | 49  | 91  | 2.38347e-05 | 41.8207 | cd16655    | RING-Ubox_WDSUB1_like     | - | cl17238 |
|          | specific     | 224025 | 565 | 716 | 3.14186e-05 | 45.7219 | COG1100    | Gem1                      | - | cl27030 |
|          | non-specific | 252675 | 47  | 112 | 0.000152335 | 40.372  | pfam04564  | U-box                     | - | cl17238 |
| Lspi0220 | non-specific | 206660 | 52  | 208 | 3.41735e-52 | 169.663 | cd01868    | Rab11_like                | - | cl21455 |
|          | superfamily  | 328724 | 52  | 208 | 3.41735e-52 | 169.663 | cl21455    | P-loop_NTPase superfamily | - | -       |
|          | non-specific | 197555 | 55  | 209 | 3.99222e-52 | 169.611 | smart00175 | RAB                       | - | cl27030 |
|          | superfamily  | 331851 | 55  | 209 | 3.99222e-52 | 169.611 | cl27030    | Ras superfamily           | - | -       |
|          | non-specific | 306559 | 56  | 211 | 3.01688e-46 | 154.199 | pfam00071  | Ras                       | - | cl27030 |
|          | non-specific | 178657 | 50  | 208 | 2.41188e-43 | 148.538 | PLN03110   | PLN03110                  | C | cl27030 |
|          | specific     | 224025 | 51  | 238 | 4.76399e-20 | 86.9383 | COG1100    | Gem1                      | - | cl27030 |
|          | non-specific | 272973 | 55  | 204 | 5.67455e-18 | 79.7233 | TIGR00231  | small_GTP                 | - | cl27769 |
|          | superfamily  | 332590 | 55  | 204 | 5.67455e-18 | 79.7233 | cl27769    | GTP_EFTU superfamily      | - | -       |
| Lspi2717 | non-specific | 206640 | 8   | 162 | 2.85849e-19 | 82.889  | cd00154    | Rab                       | - | cl21455 |
|          | superfamily  | 328724 | 8   | 162 | 2.85849e-19 | 82.889  | cl21455    | P-loop_NTPase superfamily | - | -       |
|          | specific     | 224025 | 5   | 191 | 1.50946e-15 | 74.2267 | COG1100    | Gem1                      | - | cl27030 |
|          | superfamily  | 331851 | 5   | 191 | 1.50946e-15 | 74.2267 | cl27030    | Ras superfamily           | - | -       |
|          | non-specific | 312094 | 10  | 88  | 7.41762e-13 | 64.0638 | pfam08477  | Roc                       | C | cl21455 |
|          | non-specific | 272973 | 7   | 153 | 8.38687e-07 | 48.1369 | TIGR00231  | small_GTP                 | - | cl27769 |



|           |              |        |     |     |             |         |            |                           |   |         |
|-----------|--------------|--------|-----|-----|-------------|---------|------------|---------------------------|---|---------|
|           | superfamily  | 332590 | 7   | 153 | 8.38687e-07 | 48.1369 | cl27769    | GTP_EFTU superfamily      | - | -       |
|           | non-specific | 197555 | 8   | 155 | 8.43106e-06 | 45.1915 | smart00175 | RAB                       | - | cl27030 |
| Lstei0182 | non-specific | 178657 | 8   | 86  | 0.00134237  | 39.1415 | PLN03110   | PLN03110                  | C | cl27030 |
|           | specific     | 206640 | 3   | 155 | 5.61759e-28 | 106.386 | cd00154    | Rab                       | - | cl21455 |
|           | superfamily  | 328724 | 3   | 155 | 5.61759e-28 | 106.386 | cl21455    | P-loop_NTPase superfamily | - | -       |
|           | non-specific | 306559 | 4   | 155 | 1.60416e-24 | 97.1891 | pfam00071  | Ras                       | - | cl27030 |
|           | superfamily  | 331851 | 4   | 155 | 1.60416e-24 | 97.1891 | cl27030    | Ras superfamily           | - | -       |
|           | non-specific | 197555 | 3   | 155 | 6.61186e-24 | 95.6526 | smart00175 | RAB                       | - | cl27030 |
|           | specific     | 224025 | 2   | 152 | 1.07013e-15 | 74.6119 | COG1100    | Gem1                      | C | cl27030 |
|           | non-specific | 272973 | 3   | 157 | 4.15691e-15 | 71.6341 | TIGR00231  | small_GTP                 | - | cl27769 |
|           | superfamily  | 332590 | 3   | 157 | 4.15691e-15 | 71.6341 | cl27769    | GTP_EFTU superfamily      | - | -       |
| Lstei0315 | non-specific | 178655 | 3   | 152 | 2.5333e-12  | 64.9624 | PLN03108   | PLN03108                  | C | cl27030 |
|           | non-specific | 206640 | 14  | 169 | 9.58607e-11 | 59.3918 | cd00154    | Rab                       | - | cl21455 |
|           | superfamily  | 328724 | 14  | 169 | 9.58607e-11 | 59.3918 | cl21455    | P-loop_NTPase superfamily | - | -       |
|           | non-specific | 312094 | 15  | 129 | 4.11997e-05 | 42.1074 | pfam08477  | Roc                       | - | cl21455 |
|           | non-specific | 197555 | 14  | 179 | 0.000340514 | 40.5691 | smart00175 | RAB                       | - | cl27030 |
|           | superfamily  | 331851 | 14  | 179 | 0.000340514 | 40.5691 | cl27030    | Ras superfamily           | - | -       |
|           | specific     | 224025 | 10  | 129 | 0.000843643 | 39.9439 | COG1100    | Gem1                      | C | cl27030 |
|           | non-specific | 312828 | 105 | 255 | 0.00740399  | 37.3894 | pfam09455  | Cas_DxTHG                 | N | cl21516 |
| Lstei0784 | superfamily  | 328768 | 105 | 255 | 0.00740399  | 37.3894 | cl21516    | Csx1_III-U superfamily    | N | -       |
|           | specific     | 206640 | 11  | 171 | 4.02649e-49 | 160.699 | cd00154    | Rab                       | - | cl21455 |
|           | superfamily  | 328724 | 11  | 171 | 4.02649e-49 | 160.699 | cl21455    | P-loop_NTPase superfamily | - | -       |
|           | non-specific | 306559 | 12  | 174 | 8.97959e-46 | 152.273 | pfam00071  | Ras                       | - | cl27030 |
|           | superfamily  | 331851 | 12  | 174 | 8.97959e-46 | 152.273 | cl27030    | Ras superfamily           | - | -       |
|           | non-specific | 197555 | 11  | 174 | 2.54888e-43 | 146.114 | smart00175 | RAB                       | - | cl27030 |
|           | non-specific | 178655 | 7   | 174 | 8.29323e-31 | 115.038 | PLN03108   | PLN03108                  | C | cl27030 |
|           | specific     | 224025 | 7   | 187 | 4.56012e-19 | 83.8567 | COG1100    | Gem1                      | - | cl27030 |
|           | non-specific | 272973 | 11  | 166 | 4.98422e-08 | 51.6037 | TIGR00231  | small_GTP                 | - | cl27769 |
| Lstei0814 | superfamily  | 332590 | 11  | 166 | 4.98422e-08 | 51.6037 | cl27769    | GTP_EFTU superfamily      | - | -       |
|           | specific     | 206640 | 24  | 183 | 1.48778e-46 | 150.684 | cd00154    | Rab                       | - | cl21455 |

|           |              |        |     |     |             |         |            |                           |   |         |
|-----------|--------------|--------|-----|-----|-------------|---------|------------|---------------------------|---|---------|
|           | superfamily  | 328724 | 24  | 183 | 1.48778e-46 | 150.684 | cl21455    | P-loop_NTPase superfamily | - | -       |
|           | non-specific | 306559 | 25  | 182 | 1.02109e-41 | 138.405 | pfam00071  | Ras                       | - | cl27030 |
|           | superfamily  | 331851 | 25  | 182 | 1.02109e-41 | 138.405 | cl27030    | Ras superfamily           | - | -       |
|           | non-specific | 197555 | 24  | 183 | 7.86365e-39 | 131.091 | smart00175 | RAB                       | - | cl27030 |
|           | non-specific | 178655 | 24  | 178 | 5.09208e-26 | 99.6304 | PLN03108   | PLN03108                  | C | cl27030 |
|           | specific     | 224025 | 20  | 205 | 1.06268e-20 | 85.7827 | COG1100    | Gem1                      | - | cl27030 |
|           | non-specific | 272973 | 24  | 179 | 9.84978e-17 | 73.9453 | TIGR00231  | small_GTP                 | - | cl27769 |
|           | superfamily  | 332590 | 24  | 179 | 9.84978e-17 | 73.9453 | cl27769    | GTP_EFTU superfamily      | - | -       |
| Lstei2185 | specific     | 206640 | 11  | 166 | 2.71098e-43 | 145.291 | cd00154    | Rab                       | - | cl21455 |
|           | superfamily  | 328724 | 11  | 166 | 2.71098e-43 | 145.291 | cl21455    | P-loop_NTPase superfamily | - | -       |
|           | non-specific | 197555 | 11  | 171 | 3.57043e-40 | 137.639 | smart00175 | RAB                       | - | cl27030 |
|           | superfamily  | 331851 | 11  | 171 | 3.57043e-40 | 137.639 | cl27030    | Ras superfamily           | - | -       |
|           | non-specific | 306559 | 12  | 171 | 1.24984e-37 | 130.702 | pfam00071  | Ras                       | - | cl27030 |
|           | non-specific | 178657 | 6   | 171 | 1.33604e-28 | 108.863 | PLN03110   | PLN03110                  | - | cl27030 |
|           | specific     | 224025 | 7   | 202 | 2.30724e-19 | 84.2419 | COG1100    | Gem1                      | - | cl27030 |
|           | non-specific | 272973 | 11  | 159 | 2.79022e-07 | 49.2925 | TIGR00231  | small_GTP                 | - | cl27769 |
|           | superfamily  | 332590 | 11  | 159 | 2.79022e-07 | 49.2925 | cl27769    | GTP_EFTU superfamily      | - | -       |
| Lstei2733 | non-specific | 206640 | 14  | 170 | 2.83615e-19 | 84.815  | cd00154    | Rab                       | - | cl21455 |
|           | superfamily  | 328724 | 14  | 170 | 2.83615e-19 | 84.815  | cl21455    | P-loop_NTPase superfamily | - | -       |
|           | non-specific | 291524 | 520 | 637 | 6.95075e-16 | 74.1132 | pfam14860  | DrrA_P4M                  | - | cl20758 |
|           | superfamily  | 291524 | 520 | 637 | 6.95075e-16 | 74.1132 | cl20758    | DrrA_P4M superfamily      | - | -       |
|           | non-specific | 306559 | 24  | 174 | 9.10853e-12 | 63.2916 | pfam00071  | Ras                       | - | cl27030 |
|           | superfamily  | 331851 | 24  | 174 | 9.10853e-12 | 63.2916 | cl27030    | Ras superfamily           | - | -       |
|           | non-specific | 197555 | 24  | 163 | 1.80955e-07 | 50.9695 | smart00175 | RAB                       | - | cl27030 |
|           | non-specific | 225171 | 82  | 184 | 2.65178e-06 | 49.9602 | COG2262    | HflX                      | N | cl25666 |
|           | superfamily  | 330487 | 82  | 184 | 2.65178e-06 | 49.9602 | cl25666    | HflX superfamily          | N | -       |
|           | non-specific | 237177 | 308 | 462 | 1.41991e-05 | 47.8506 | PRK12704   | PRK12704                  | C | cl25602 |
|           | superfamily  | 330423 | 308 | 462 | 1.41991e-05 | 47.8506 | cl25602    | DUF3552 superfamily       | C | -       |
|           | non-specific | 129567 | 15  | 178 | 7.65951e-05 | 45.6345 | TIGR00475  | selB                      | C | cl27768 |
|           | superfamily  | 332589 | 15  | 178 | 7.65951e-05 | 45.6345 | cl27768    | SelB superfamily          | C | -       |

|             |              |        |     |           |             |         |                 |                           |    |         |
|-------------|--------------|--------|-----|-----------|-------------|---------|-----------------|---------------------------|----|---------|
| Lstei3518   | non-specific | 235392 | 84  | 180       | 0.000491992 | 42.7903 | PRK05291        | trmE                      | N  | cl26334 |
|             | superfamily  | 331155 | 84  | 180       | 0.000491992 | 42.7903 | cl26334         | MnmE_helical superfamily  | N  | -       |
|             | non-specific | 206640 | 43  | 124       | 4.61271e-08 | 50.9174 | cd00154         | Rab                       | N  | cl21455 |
|             | superfamily  | 328724 | 43  | 124       | 4.61271e-08 | 50.9174 | cl21455         | P-loop_NTPase superfamily | N  | -       |
|             | non-specific | 274669 | 61  | 143       | 1.47157e-05 | 45.1926 | TIGR03596       | GTPase_YlqF               | C  | cl26335 |
|             | superfamily  | 331156 | 61  | 143       | 1.47157e-05 | 45.1926 | cl26335         | RbgA superfamily          | C  | -       |
|             | non-specific | 236570 | 61  | 167       | 0.000464844 | 40.5399 | PRK09563        | rbgA                      | C  | cl26335 |
|             | non-specific | 223447 | 73  | 204       | 0.00150761  | 39.5819 | COG0370         | FeoB                      | C  | cl26333 |
|             | superfamily  | 331154 | 73  | 204       | 0.00150761  | 39.5819 | cl26333         | FeoB_N superfamily        | C  | -       |
|             | non-specific | 225815 | 70  | 147       | 0.0038554   | 38.1491 | COG3276         | SelB                      | NC | cl27768 |
|             | superfamily  | 332589 | 70  | 147       | 0.0038554   | 38.1491 | cl27768         | SelB superfamily          | NC | -       |
|             | non-specific | 306559 | 43  | 130       | 0.0056064   | 36.3276 | pfam00071       | Ras                       | N  | cl27030 |
| superfamily | 331851       | 43     | 130 | 0.0056064 | 36.3276     | cl27030 | Ras superfamily | N                         | -  |         |
| Ltau0427    | specific     | 206648 | 1   | 141       | 0.00400619  | 37.0508 | cd00882         | Ras_like_GTPase           | -  | cl21455 |
|             | superfamily  | 328724 | 1   | 141       | 0.00400619  | 37.0508 | cl21455         | P-loop_NTPase superfamily | -  | -       |
| Ltuc0732    | specific     | 206640 | 7   | 162       | 8.44031e-28 | 106.001 | cd00154         | Rab                       | -  | cl21455 |
|             | superfamily  | 328724 | 7   | 162       | 8.44031e-28 | 106.001 | cl21455         | P-loop_NTPase superfamily | -  | -       |
|             | non-specific | 197555 | 7   | 162       | 5.22425e-25 | 98.7342 | smart00175      | RAB                       | -  | cl27030 |
|             | superfamily  | 331851 | 7   | 162       | 5.22425e-25 | 98.7342 | cl27030         | Ras superfamily           | -  | -       |
|             | non-specific | 306559 | 8   | 166       | 2.98398e-24 | 96.4187 | pfam00071       | Ras                       | -  | cl27030 |
|             | specific     | 224025 | 3   | 172       | 5.1698e-16  | 75.7675 | COG1100         | Gem1                      | -  | cl27030 |
|             | non-specific | 272973 | 6   | 160       | 1.34955e-13 | 67.3969 | TIGR00231       | small_GTP                 | -  | cl27769 |
|             | superfamily  | 332590 | 6   | 160       | 1.34955e-13 | 67.3969 | cl27769         | GTP_EFTU superfamily      | -  | -       |
|             | non-specific | 178657 | 7   | 160       | 1.50716e-13 | 68.4166 | PLN03110        | PLN03110                  | C  | cl27030 |
| Ltuc1844    | specific     | 206640 | 13  | 168       | 6.80992e-38 | 131.424 | cd00154         | Rab                       | -  | cl21455 |
|             | superfamily  | 328724 | 13  | 168       | 6.80992e-38 | 131.424 | cl21455         | P-loop_NTPase superfamily | -  | -       |
|             | non-specific | 197555 | 13  | 173       | 1.24458e-37 | 131.091 | smart00175      | RAB                       | -  | cl27030 |
|             | superfamily  | 331851 | 13  | 173       | 1.24458e-37 | 131.091 | cl27030         | Ras superfamily           | -  | -       |
|             | non-specific | 306559 | 14  | 173       | 6.8529e-35  | 123.768 | pfam00071       | Ras                       | -  | cl27030 |
|             | non-specific | 178657 | 1   | 180       | 7.60852e-30 | 112.329 | PLN03110        | PLN03110                  | -  | cl27030 |

|          |              |        |    |     |             |         |            |                           |   |         |
|----------|--------------|--------|----|-----|-------------|---------|------------|---------------------------|---|---------|
| Ltuc2453 | specific     | 224025 | 9  | 201 | 4.49015e-19 | 83.4715 | COG1100    | Gem1                      | - | cl27030 |
|          | non-specific | 272973 | 13 | 161 | 7.32532e-14 | 67.7821 | TIGR00231  | small_GTP                 | - | cl27769 |
|          | superfamily  | 332590 | 13 | 161 | 7.32532e-14 | 67.7821 | cl27769    | GTP_EFTU superfamily      | - | -       |
|          | non-specific | 206640 | 34 | 183 | 2.39317e-22 | 91.3634 | cd00154    | Rab                       | - | cl21455 |
|          | superfamily  | 328724 | 34 | 183 | 2.39317e-22 | 91.3634 | cl21455    | P-loop_NTPase superfamily | - | -       |
|          | non-specific | 306559 | 34 | 178 | 2.5462e-15  | 72.1512 | pfam00071  | Ras                       | - | cl27030 |
|          | superfamily  | 331851 | 34 | 178 | 2.5462e-15  | 72.1512 | cl27030    | Ras superfamily           | - | -       |
|          | non-specific | 197555 | 34 | 178 | 2.227e-13   | 66.7627 | smart00175 | RAB                       | - | cl27030 |
| Ltuc2903 | specific     | 224025 | 24 | 204 | 2.61736e-05 | 44.5663 | COG1100    | Gem1                      | - | cl27030 |
|          | non-specific | 274720 | 27 | 196 | 3.79902e-05 | 44.6578 | TIGR03680  | eif2g_arch                | C | cl27768 |
|          | superfamily  | 332589 | 27 | 196 | 3.79902e-05 | 44.6578 | cl27768    | SeIB superfamily          | C | -       |
|          | non-specific | 235392 | 98 | 184 | 0.00015247  | 42.7903 | PRK05291   | trmE                      | N | cl26334 |
|          | superfamily  | 331155 | 98 | 184 | 0.00015247  | 42.7903 | cl26334    | MnmE_helical superfamily  | N | -       |
|          | specific     | 206640 | 11 | 170 | 8.54044e-50 | 162.24  | cd00154    | Rab                       | - | cl21455 |
|          | superfamily  | 328724 | 11 | 170 | 8.54044e-50 | 162.24  | cl21455    | P-loop_NTPase superfamily | - | -       |
|          | non-specific | 197555 | 11 | 173 | 4.17677e-49 | 160.751 | smart00175 | RAB                       | - | cl27030 |
| Lwad1230 | superfamily  | 331851 | 11 | 173 | 4.17677e-49 | 160.751 | cl27030    | Ras superfamily           | - | -       |
|          | non-specific | 306559 | 12 | 173 | 7.08211e-42 | 141.872 | pfam00071  | Ras                       | - | cl27030 |
|          | non-specific | 178655 | 11 | 173 | 1.2569e-29  | 111.572 | PLN03108   | PLN03108                  | C | cl27030 |
|          | specific     | 224025 | 7  | 206 | 3.68227e-20 | 86.5531 | COG1100    | Gem1                      | - | cl27030 |
|          | non-specific | 272973 | 11 | 162 | 1.09756e-14 | 70.0933 | TIGR00231  | small_GTP                 | - | cl27769 |
|          | superfamily  | 332590 | 11 | 162 | 1.09756e-14 | 70.0933 | cl27769    | GTP_EFTU superfamily      | - | -       |
|          | non-specific | 206640 | 3  | 156 | 4.05313e-17 | 77.111  | cd00154    | Rab                       | - | cl21455 |
|          | superfamily  | 328724 | 3  | 156 | 4.05313e-17 | 77.111  | cl21455    | P-loop_NTPase superfamily | - | -       |
| Lwad1230 | non-specific | 312094 | 4  | 115 | 7.20635e-12 | 61.3674 | pfam08477  | Roc                       | - | cl21455 |
|          | non-specific | 197555 | 3  | 156 | 1.40863e-10 | 58.6735 | smart00175 | RAB                       | - | cl27030 |
|          | superfamily  | 331851 | 3  | 156 | 1.40863e-10 | 58.6735 | cl27030    | Ras superfamily           | - | -       |
|          | specific     | 224025 | 2  | 190 | 1.58439e-08 | 54.1963 | COG1100    | Gem1                      | - | cl27030 |
|          | non-specific | 235392 | 71 | 164 | 3.18493e-06 | 48.1831 | PRK05291   | trmE                      | N | cl26334 |
|          | superfamily  | 331155 | 71 | 164 | 3.18493e-06 | 48.1831 | cl26334    | MnmE_helical superfamily  | N | -       |

|              |              |        |     |             |             |            |            |                           |         |         |
|--------------|--------------|--------|-----|-------------|-------------|------------|------------|---------------------------|---------|---------|
| Lwad2065     | non-specific | 272973 | 2   | 154         | 4.64644e-06 | 45.8257    | TIGR00231  | small_GTP                 | -       | cl27769 |
|              | superfamily  | 332590 | 2   | 154         | 4.64644e-06 | 45.8257    | cl27769    | GTP_EFTU superfamily      | -       | -       |
|              | specific     | 206640 | 22  | 180         | 1.44539e-51 | 167.248    | cd00154    | Rab                       | -       | cl21455 |
|              | superfamily  | 328724 | 22  | 180         | 1.44539e-51 | 167.248    | cl21455    | P-loop_NTPase superfamily | -       | -       |
|              | non-specific | 197555 | 22  | 184         | 4.77193e-45 | 150.736    | smart00175 | RAB                       | -       | cl27030 |
|              | superfamily  | 331851 | 22  | 184         | 4.77193e-45 | 150.736    | cl27030    | Ras superfamily           | -       | -       |
|              | non-specific | 306559 | 23  | 184         | 1.28264e-43 | 146.88     | pfam00071  | Ras                       | -       | cl27030 |
|              | non-specific | 178657 | 16  | 188         | 6.3476e-30  | 113.1      | PLN03110   | PLN03110                  | -       | cl27030 |
|              | specific     | 224025 | 18  | 200         | 8.13497e-17 | 77.6935    | COG1100    | Gem1                      | -       | cl27030 |
| Lwad3214     | non-specific | 272973 | 22  | 179         | 2.22529e-10 | 58.1521    | TIGR00231  | small_GTP                 | -       | cl27769 |
|              | superfamily  | 332590 | 22  | 179         | 2.22529e-10 | 58.1521    | cl27769    | GTP_EFTU superfamily      | -       | -       |
|              | specific     | 206640 | 238 | 405         | 2.82085e-25 | 100.608    | cd00154    | Rab                       | -       | cl21455 |
|              | superfamily  | 328724 | 238 | 405         | 2.82085e-25 | 100.608    | cl21455    | P-loop_NTPase superfamily | -       | -       |
|              | non-specific | 306559 | 244 | 397         | 1.29276e-24 | 99.1151    | pfam00071  | Ras                       | -       | cl27030 |
|              | superfamily  | 331851 | 244 | 397         | 1.29276e-24 | 99.1151    | cl27030    | Ras superfamily           | -       | -       |
|              | non-specific | 197555 | 238 | 410         | 1.47524e-21 | 90.6451    | smart00175 | RAB                       | -       | cl27030 |
|              | non-specific | 178655 | 314 | 397         | 4.85928e-11 | 61.8808    | PLN03108   | PLN03108                  | NC      | cl27030 |
|              | non-specific | 272973 | 240 | 397         | 3.05158e-06 | 46.9813    | TIGR00231  | small_GTP                 | -       | cl27769 |
| Lwal3261     | superfamily  | 332590 | 240 | 397         | 3.05158e-06 | 46.9813    | cl27769    | GTP_EFTU superfamily      | -       | -       |
|              | specific     | 315592 | 192 | 230         | 6.86213e-06 | 42.4697    | pfam12937  | F-box-like                | -       | cl02535 |
|              | superfamily  | 321975 | 192 | 230         | 6.86213e-06 | 42.4697    | cl02535    | F-box superfamily         | -       | -       |
|              | specific     | 224025 | 234 | 424         | 0.000383319 | 41.4847    | COG1100    | Gem1                      | -       | cl27030 |
|              | specific     | 197608 | 195 | 225         | 0.000725955 | 36.6458    | smart00256 | FBOX                      | C       | cl02535 |
|              | specific     | 206640 | 22  | 171         | 2.87133e-30 | 108.312    | cd00154    | Rab                       | -       | cl21455 |
|              | superfamily  | 328724 | 22  | 171         | 2.87133e-30 | 108.312    | cl21455    | P-loop_NTPase superfamily | -       | -       |
|              | non-specific | 306559 | 22  | 174         | 1.32477e-27 | 101.426    | pfam00071  | Ras                       | -       | cl27030 |
|              | superfamily  | 331851 | 22  | 174         | 1.32477e-27 | 101.426    | cl27030    | Ras superfamily           | -       | -       |
| non-specific | 197555       | 22     | 174 | 2.43584e-27 | 101.045     | smart00175 | RAB        | -                         | cl27030 |         |
| non-specific | 178655       | 20     | 187 | 6.22667e-14 | 66.8884     | PLN03108   | PLN03108   | -                         | cl27030 |         |
| specific     | 224025       | 22     | 188 | 4.35696e-13 | 64.9819     | COG1100    | Gem1       | -                         | cl27030 |         |

|              |              |        |     |             |             |           |                       |                           |         |         |
|--------------|--------------|--------|-----|-------------|-------------|-----------|-----------------------|---------------------------|---------|---------|
| Lwor1982     | non-specific | 272973 | 20  | 166         | 0.000134437 | 40.433    | TIGR00231             | small_GTP                 | -       | cl27769 |
|              | superfamily  | 332590 | 20  | 166         | 0.000134437 | 40.433    | cl27769               | GTP_EFTU superfamily      | -       | -       |
|              | non-specific | 306559 | 37  | 204         | 2.52246e-36 | 128.776   | pfam00071             | Ras                       | -       | cl27030 |
|              | superfamily  | 331851 | 37  | 204         | 2.52246e-36 | 128.776   | cl27030               | Ras superfamily           | -       | -       |
|              | specific     | 206640 | 33  | 200         | 5.40182e-36 | 127.572   | cd00154               | Rab                       | -       | cl21455 |
|              | superfamily  | 328724 | 33  | 200         | 5.40182e-36 | 127.572   | cl21455               | P-loop_NTPase superfamily | -       | -       |
|              | non-specific | 197555 | 33  | 205         | 5.79259e-33 | 119.92    | smart00175            | RAB                       | -       | cl27030 |
|              | non-specific | 178655 | 29  | 205         | 6.09805e-16 | 75.3628   | PLN03108              | PLN03108                  | -       | cl27030 |
|              | specific     | 224025 | 29  | 206         | 3.88678e-15 | 73.4563   | COG1100               | Gem1                      | -       | cl27030 |
|              | non-specific | 272973 | 33  | 197         | 4.56521e-08 | 51.6037   | TIGR00231             | small_GTP                 | -       | cl27769 |
| superfamily  | 332590       | 33     | 197 | 4.56521e-08 | 51.6037     | cl27769   | GTP_EFTU superfamily  | -                         | -       |         |
| Lya1031      | non-specific | 281323 | 6   | 53          | 0.00384526  | 38.1847   | pfam03308             | ArgK                      | C       | cl21455 |
|              | superfamily  | 328724 | 6   | 53          | 0.00384526  | 38.1847   | cl21455               | P-loop_NTPase superfamily | C       | -       |
|              | non-specific | 206640 | 14  | 164         | 1.37372e-22 | 93.6746   | cd00154               | Rab                       | -       | cl21455 |
|              | superfamily  | 328724 | 14  | 164         | 1.37372e-22 | 93.6746   | cl21455               | P-loop_NTPase superfamily | -       | -       |
|              | non-specific | 306559 | 14  | 164         | 1.00662e-17 | 79.8552   | pfam00071             | Ras                       | -       | cl27030 |
|              | superfamily  | 331851 | 14  | 164         | 1.00662e-17 | 79.8552   | cl27030               | Ras superfamily           | -       | -       |
|              | non-specific | 197555 | 14  | 164         | 3.92337e-17 | 78.3187   | smart00175            | RAB                       | -       | cl27030 |
|              | specific     | 224025 | 6   | 164         | 2.00895e-10 | 60.3595   | COG1100               | Gem1                      | -       | cl27030 |
|              | non-specific | 178655 | 14  | 121         | 5.3416e-07  | 49.9396   | PLN03108              | PLN03108                  | C       | cl27030 |
|              | non-specific | 272973 | 17  | 162         | 1.08565e-05 | 45.4405   | TIGR00231             | small_GTP                 | -       | cl27769 |
| superfamily  | 332590       | 17     | 162 | 1.08565e-05 | 45.4405     | cl27769   | GTP_EFTU superfamily  | -                         | -       |         |
| non-specific | 308683       | 342    | 398 | 0.00294546  | 39.3484     | pfam03186 | CobD_Cbib             | C                         | cl00561 |         |
| superfamily  | 321043       | 342    | 398 | 0.00294546  | 39.3484     | cl00561   | CobD_Cbib superfamily | C                         | -       |         |

The hits reported in the table are defined according to the database used: top-ranking RPS-BLAST hit that meets or exceeds a domain-specific E-value threshold and represents a high confidence result = specific; hits that meet or exceed the RPS-BLAST threshold for statistical significance = non-specific and the domain cluster to which the specific and/or non-specific hits belongs = superfamily

**Table S5: Eukaryotic like proteins detected in the *Legionella* genomes analyzed in this study**

| Protein label <sup>1</sup> | N <sup>2</sup> | Selection criteria <sup>3</sup>  | Organism <sup>4</sup>               | First eukaryotic blast hit annotation <sup>4</sup>  | Acession number <sup>5</sup> | % Identity <sup>6</sup> |
|----------------------------|----------------|----------------------------------|-------------------------------------|-----------------------------------------------------|------------------------------|-------------------------|
| ACZG10723                  | 1              | 2 first hsp are Euka             | <i>Amphimedon queenslandica</i>     | -                                                   | I1ENB1                       | 30.34%                  |
| Lade1822                   | 10             | 3 first hsp are Euka             | <i>Aspergillus parasiticus</i>      | FAD dependent oxidoreductase                        | A0A0F0IS82                   | 46.59%                  |
| Lade1824                   | 7              | ratio Euka/Proka : 85.0 / 15.0   | <i>Plasmodiophora brassicae</i>     | -                                                   | A0A0G4IGX2                   | 48.03%                  |
| Lade1989                   | 9              | ratio Euka/Proka : 87.5 / 12.5   | <i>Fonticula alba</i>               | -                                                   | A0A058Z2R2                   | 30.65%                  |
| Lade2253                   | 9              | 3 first hsp are Euka             | <i>Parastrongyloides trichosuri</i> | -                                                   | A0A0N4ZLE8                   | 87.10%                  |
| LanA0735                   | 72             | ratio Euka/Proka : 90.0 / 10.0   | <i>Dictyostelium purpureum</i>      | -                                                   | F1A5L6                       | 44.38%                  |
| LanA1199                   | 7              | 3 first hsp are Euka             | <i>Ancylostoma ceylanicum</i>       | Methyltransferase type 11 domain containing protein | A0A016VGN9                   | 38.32%                  |
| LanA3229                   | 2              | 3 first hsp are Euka             | <i>Capsaspora owczarzaki</i>        | -                                                   | A0A0D2WV05                   | 32.08%                  |
| LanA3375                   | 1              | 3 first hsp are Euka             | <i>Dictyostelium lacteum</i>        | Putative acyl-CoA dehydrogenase                     | A0A152A144                   | 34.51%                  |
| LanA3786                   | 20             | ratio Euka/Proka : 90.0 / 10.0   | <i>Polysphondylium pallidum</i>     | -                                                   | D3B9U2                       | 46.24%                  |
| LanB1993                   | 2              | 3 first hsp are Euka             | <i>Brachypodium distachyon</i>      | -                                                   | I1GKX8                       | 33.09%                  |
| Lbe0019                    | 20             | 1 first hsp is Euka              | <i>Acanthamoeba castellanii</i>     | Eukaryotic family protein                           | L8HFQ5                       | 35.25%                  |
| Lbe0340                    | 1              | 2 first hsp are Euka             | <i>Gonapodya prolifera</i>          | -                                                   | A0A138ZX02                   | 39.06%                  |
| Lbe0740                    | 12             | 3 first hsp are Euka             | <i>Callithrix jacchus</i>           | DnaJ-like subfamily B member 3                      | F7F2J3                       | 30.99%                  |
| Lbe0772                    | 13             | 3 first hsp are Euka             | <i>Perkinsus marinus</i>            | Uridine phosphorylase, putative                     | C5KRK2                       | 41.63%                  |
| Lbe1600                    | 6              | 3 first hsp are Euka             | <i>Ichthyophthirius multifiliis</i> | -                                                   | G0R1H7                       | 33.52%                  |
| Lbe1645                    | 1              | 3 first hsp are Euka             | <i>Rhizophagus irregularis</i>      | Skt5p                                               | U9SN83                       | 33.33%                  |
| Lbe1659                    | 5              | 3 first hsp are Euka             | <i>Rhizophagus irregularis</i>      | Skt5p                                               | A0A015JE96                   | 34.68%                  |
| Lbe1728                    | 4              | ratio Euka/Proka : 81.25 / 18.75 | <i>Physcomitrella patens</i>        | -                                                   | A9TZI2                       | 40.23%                  |
| Lbe1862                    | 1              | 1 first hsp is Euka              | <i>Rhizophagus irregularis</i>      | Skt5p                                               | A0A015JE96                   | 31.58%                  |
| Lbe2177                    | 15             | ratio Euka/Proka : 80.0 / 20.0   | <i>Sphaerobolus stellatus</i>       | -                                                   | A0A0C9US25                   | 32.30%                  |
| Lbe2282                    | 6              | 3 first hsp are Euka             | <i>Cladophialophora immunda</i>     | -                                                   | A0A0D2C3Y5                   | 49.57%                  |
| Lbe2299                    | 1              | 3 first hsp are Euka             | <i>Galdieria sulphuraria</i>        | FBox-LRR protein                                    | M2XRJ2                       | 42.50%                  |
| Lbe2310                    | 1              | 3 first hsp are Euka             | <i>Capsaspora owczarzaki</i>        | NOD3 protein                                        | A0A0D2WSZ0                   | 39.73%                  |
| Lbe2341                    | 1              | 3 first hsp are Euka             | <i>Chrysochromulina sp. CCMP291</i> | Surface antigen-like protein                        | A0A0M0KNG8                   | 40.67%                  |

|          |    |                                |                                  |                                                             |            |        |
|----------|----|--------------------------------|----------------------------------|-------------------------------------------------------------|------------|--------|
| Lbe2343  | 1  | 3 first hsp are Euka           | <i>Emiliana huxleyi</i>          | Adenylosuccinate synthetase                                 | R1F4J9     | 34.80% |
| Lbe2344  | 1  | 3 first hsp are Euka           | <i>Emiliana huxleyi</i>          | -                                                           | R1DLW0     | 32.49% |
| Lbe2454  | 19 | 1 first hsp is Euka            | <i>Botryosphaeria parva</i>      | Putative endoglucanase ii protein                           | R1GLD6     | 30.51% |
| Lbe2456  | 1  | ratio Euka/Proka : 90.0 / 10.0 | <i>Emiliana huxleyi</i>          | -                                                           | R1DGC4     | 40.70% |
| Lbir0552 | 1  | 3 first hsp are Euka           | <i>Perkinsus marinus</i>         | Chaperone protein DNAJ, putative                            | C5LFS5     | 30.97% |
| Lbir0715 | 4  | ratio Euka/Proka : 90.0 / 10.0 | <i>Penicillium brasilianum</i>   | -                                                           | A0A0F7TRV6 | 55.38% |
| Lbir1228 | 3  | 3 first hsp are Euka           | <i>Caenorhabditis briggsae</i>   | Protein CBG20767                                            | A8XYK4     | 30.21% |
| Lbir1251 | 6  | 3 first hsp are Euka           | <i>Saprolegnia diclina</i>       | -                                                           | T0RWI4     | 41.13% |
| Lbir1504 | 5  | 1 first hsp is Euka            | <i>Stegodyphus mimosarum</i>     | N-acyl-phosphatidylethanolamine-hydrolyzing phospholipase D | A0A087UUR9 | 37.45% |
| Lbir2190 | 1  | ratio Euka/Proka : 85.0 / 15.0 | <i>Talaromyces islandicus</i>    | -                                                           | A0A0U1LI69 | 55.07% |
| Lbir2253 | 3  | 3 first hsp are Euka           | <i>Fusarium langsethiae</i>      | Glu leu phe val dehydrogenase family protein                | A0A0M9EMS8 | 32.05% |
| Lbir2979 | 6  | 3 first hsp are Euka           | <i>Stemphylium lycopersici</i>   | Glycosyltransferase family 2 protein                        | A0A0L1HWJ1 | 30.60% |
| LboA0084 | 7  | 3 first hsp are Euka           | <i>Candida parapsilosis</i>      | -                                                           | G8BFF3     | 30.16% |
| LboA2873 | 1  | 3 first hsp are Euka           | <i>Plasmodium falciparum</i>     | Phage tail fiber repeat family protein                      | A0A0L1IDW5 | 47.56% |
| LboB2649 | 1  | 3 first hsp are Euka           | <i>Plasmodium falciparum</i>     | -                                                           | A0A0L7M116 | 45.83% |
| Lbru1260 | 1  | 3 first hsp are Euka           | <i>Neolentinus lepideus</i>      | -                                                           | A0A165SYS3 | 37.04% |
| Lbru1261 | 1  | ratio Euka/Proka : 90.0 / 10.0 | <i>Talaromyces marneffeii</i>    | -                                                           | B6Q2Y2     | 44.44% |
| Lbru1478 | 3  | 3 first hsp are Euka           | <i>Naegleria gruberi</i>         | -                                                           | D2V8Z2     | 39.85% |
| Lbru1758 | 3  | 2 first hsp are Euka           | <i>Capsaspora owczarzakii</i>    | LLRcontaining protein                                       | A0A0D2WSZ0 | 31.65% |
| Lbru2096 | 12 | 3 first hsp are Euka           | <i>Eimeria acervulina</i>        | Trypsin, putative                                           | U6GWD7     | 30.51% |
| Lbru2322 | 1  | ratio Euka/Proka : 90.0 / 10.0 | <i>Capsaspora owczarzakii</i>    | -                                                           | A0A0D2WI15 | 30.00% |
| Lbru2342 | 8  | ratio Euka/Proka : 90.0 / 10.0 | <i>Aspergillus lentulus</i>      | -                                                           | A0A0S7DG03 | 34.93% |
| Lbru3029 | 1  | 3 first hsp are Euka           | <i>Naegleria gruberi</i>         | -                                                           | D2W4W1     | 38.78% |
| Lbru3450 | 1  | 3 first hsp are Euka           | <i>Chrysochromulina sp.</i>      | -                                                           | A0A0M0JZA7 | 43.57% |
| Lbu2390  | 1  | 3 first hsp are Euka           | CCMP291                          | -                                                           | R1EV16     | 43.75% |
| Lbu2846  | 2  | ratio Euka/Proka : 95.0 / 5.0  | <i>Pyrenochaeta sp. DS3sAY3a</i> | FAD-binding domain-containing protein                       | A0A178E9S5 | 34.95% |
| Lche1013 | 1  | 3 first hsp are Euka           | <i>Globodera pallida</i>         | -                                                           | A0A183CDG3 | 50.94% |
| Lche2319 | 3  | 1 first hsp is Euka            | <i>Styloynchia lemnae</i>        | -                                                           | A0A078AVP8 | 42.15% |
| Lche2728 | 1  | 3 first hsp are Euka           | <i>Ostreococcus tauri</i>        | SAICAR synthetase                                           | A0A096PBL5 | 61.90% |



|           |    |                               |                                                                     |                                                                                      |                     |            |        |
|-----------|----|-------------------------------|---------------------------------------------------------------------|--------------------------------------------------------------------------------------|---------------------|------------|--------|
| Lci0457   | 3  | 3 first hsp are Euka          | <i>Salpingoeca rosetta</i>                                          | -                                                                                    | F2UPJ7              | 30.82%     |        |
| Lci0897   | 12 | ratio Euka/Proka : 95.0 / 5.0 | <i>Brassica oleracea</i>                                            | -                                                                                    | A0A0D3DHV8          | 33.44%     |        |
| Lci2625   | 3  | 3 first hsp are Euka          | <i>Aureobasidium pullulans</i>                                      | Aldehyde reductase                                                                   | A0A074XVJ7          | 34.56%     |        |
| Lci3380   | 9  | 2 first hsp are Euka          | <i>Serpula lacrymans</i>                                            | -                                                                                    | F8Q8I7              | 30.00%     |        |
| Lci3406   | 7  | 3 first hsp are Euka          | <i>Tetrahymena thermophila</i>                                      | Glycoside hydrolase family 45 protein                                                | Q22C01              | 32.82%     |        |
| Ldra0046  | 10 | 3 first hsp are Euka          | <i>Gymnopus luxurians</i>                                           | -                                                                                    | A0A0D0B9J6          | 48.09%     |        |
| Ldra1192  | 11 | 3 first hsp are Euka          | <i>Eucalyptus grandis</i><br><i>Chrysochromulina sp.</i><br>CCMP291 | Glutamate decarboxylase                                                              | A0A059AV55          | 50.93%     |        |
| Ldra1891  | 1  | 1 first hsp is Euka           | <i>Naegleria gruberi</i>                                            | -                                                                                    | A0A0M0JJJ8          | 32.33%     |        |
| Ldra2081  | 1  | 1 first hsp is Euka           | <i>Naegleria gruberi</i>                                            | Leucine-rich repeat protein                                                          | D2W108              | 32.80%     |        |
| Ldra2921  | 2  | 2 first hsp are Euka          | <i>Sorghum bicolor</i>                                              | -                                                                                    | A0A1B6Q4Z9          | 33.33%     |        |
| Ldra3301  | 1  | 3 first hsp are Euka          | <i>Diplodia seriata</i>                                             | Putative glucoamylase i                                                              | A0A0G2E0P2          | 38.79%     |        |
| Ldro0452  | 1  | 3 first hsp are Euka          | <i>Trichomonas vaginalis</i>                                        | Surface antigen BspA-like                                                            | A2DVL8              | 42.31%     |        |
| Ldro0457  | 6  | ratio Euka/Proka : 90.9 / 9.1 | <i>Penicillium oxalicum</i>                                         | -                                                                                    | S8ARP3              | 31.03%     |        |
| Ldro2389  | 2  | ratio Euka/Proka : 92.9 / 7.1 | <i>Penicillium roqueforti</i>                                       | -                                                                                    | W6QH56              | 38.49%     |        |
| Ldro2472  | 1  | 3 first hsp are Euka          | <i>Branchiostoma floridae</i>                                       | -                                                                                    | C3YE87              | 38.26%     |        |
| LduN23308 | 5  | 2                             | 3 first hsp are Euka                                                | <i>Acanthamoeba castellanii</i>                                                      | -                   | L8H1F6     | 35.23% |
| Lery0318  | 1  | 3 first hsp are Euka          | <i>Triticum urartu</i>                                              | Clade-C Terpene synthase, putative ent-copalyl diphosphate synthase 1, chloroplastic | T1NQ08              | 34.26%     |        |
| Lery0465  | 3  | ratio Euka/Proka : 94.4 / 5.6 | <i>Ostreococcus lucimarinus</i>                                     | -                                                                                    | A4RVY1              | 31.90%     |        |
| Lfair0216 | 1  | 1 first hsp is Euka           | <i>Salpingoeca rosetta</i>                                          | -                                                                                    | F2U9A2              | 31.46%     |        |
| Lfair0946 | 1  | 3 first hsp are Euka          | <i>Echinococcus multilocularis</i>                                  | DnaJ protein subfamily B 2                                                           | A0A068YAJ3          | 31.45%     |        |
| Lfair1553 | 1  | 3 first hsp are Euka          | <i>Ciona savignyi</i><br><i>Chrysochromulina sp.</i><br>CCMP291     | -                                                                                    | H2Z3Z9              | 46.51%     |        |
| Lfair1778 | 1  | 1 first hsp is Euka           | <i>Chrysochromulina sp.</i><br>CCMP291                              | -                                                                                    | A0A0M0JZA7          | 38.82%     |        |
| Lfair2129 | 1  | 3 first hsp are Euka          | <i>Leishmania braziliensis</i>                                      | Hypothetical repeat protein                                                          | A4H7Q0              | 50.75%     |        |
| Lfair2188 | 1  | 3 first hsp are Euka          | <i>Pseudocercospora fijiensis</i>                                   | -                                                                                    | N1QCJ6              | 33.33%     |        |
| LFAv2_055 | 7  | 1                             | 3 first hsp are Euka                                                | <i>Coccomyxa subellipsoidea</i>                                                      | Glycoside hydrolase | I0Z331     | 35.75% |
| LFAv2_133 | 4  | 2                             | 3 first hsp are Euka                                                | <i>Trichinella sp. T6</i>                                                            | -                   | A0A0V0W3N9 | 47.55% |
| LFAv2_188 | 1  | 1                             | 3 first hsp are Euka                                                | <i>Salpingoeca rosetta</i>                                                           | -                   | F2UJX0     | 33.02% |

|           |    |                                |                                   |                                               |            |        |
|-----------|----|--------------------------------|-----------------------------------|-----------------------------------------------|------------|--------|
| Lge1638   | 2  | 3 first hsp are Euka           | <i>Capsaspora owczarzaki</i>      | LLR containing protein                        | A0A0D2WSZ0 | 34.78% |
| Lge2437   | 1  | ratio Euka/Proka : 85.0 / 15.0 | <i>Solanum tuberosum</i>          | -                                             | M0ZWB1     | 63.04% |
| Lge2582   | 2  | ratio Euka/Proka : 85.7 / 14.3 | <i>Capsaspora owczarzaki</i>      | -                                             | A0A0D2UFC5 | 30.71% |
| Lges0487  | 1  | 2 first hsp are Euka           | <i>Rhizophagus irregularis</i>    | Ack1p                                         | A0A015JL58 | 30.23% |
| Lges1836  | 2  | ratio Euka/Proka : 90.0 / 10.0 | <i>Musa acuminata</i>             | -                                             | M0TQA4     | 41.15% |
| LgoB0303  | 1  | 3 first hsp are Euka           | <i>Cyanidioschyzon merolae</i>    | Glycolate oxidase, peroxysomal                | M1VAT1     | 57.69% |
| LgoB1635  | 1  | 3 first hsp are Euka           | <i>Alligator mississippiensis</i> | 26S proteasome non-ATPase regulatory          | A0A151NN67 | 30.29% |
| LgoB3790  | 1  | 1 first hsp is Euka            | <i>Chrysochromulina sp.</i>       | subunit 10                                    |            |        |
| LgoB3932  | 1  | 3 first hsp are Euka           | <i>CCMP291</i>                    | Protein-tyrosine dual specificity domain      | A0A0M0JX11 | 32.08% |
| LgoB3932  | 1  | 3 first hsp are Euka           | <i>Xenopus tropicalis</i>         | protein                                       | A0A1B8Y5G5 | 41.44% |
| Lgra3222  | 8  | 3 first hsp are Euka           | <i>Thecamonas trahens</i>         | -                                             | A0A0L0DKJ3 | 30.77% |
| Lgre2549  | 1  | 1 first hsp is Euka            | <i>Phialophora attae</i>          | Peptide deformylase                           | A0A0N1P1T9 | 47.22% |
| Lgre2588  | 1  | 3 first hsp are Euka           | <i>Ciona savignyi</i>             | -                                             | H2YKI2     | 44.00% |
| Lgre3299  | 1  | 2 first hsp are Euka           | <i>Gonapodya prolifera</i>        | -                                             | A0A138ZX02 | 38.50% |
| Lgre3406  | 1  | 3 first hsp are Euka           | <i>Capsaspora owczarzaki</i>      | -                                             | A0A0D2X3N9 | 44.62% |
| Lgre3434  | 1  | 3 first hsp are Euka           | <i>Tetrahymena thermophila</i>    | Kinase domain protein                         | Q239Q8     | 36.27% |
| LHAV2_082 | 6  | 3 first hsp are Euka           | <i>Dictyostelium discoideum</i>   | Predicted HD phosphohydrolase family          | Q54GY3     | 40.00% |
| LHAV2_105 | 5  | 3 first hsp are Euka           | <i>Hebeloma cylindrosporum</i>    | protein                                       |            |        |
| Lis0327   | 1  | 1 first hsp is Euka            | <i>Myceliophthora thermophila</i> | -                                             | A0A0C3C641 | 58.82% |
| Lis0768   | 1  | 2 first hsp are Euka           | <i>Dictyostelium discoideum</i>   | -                                             | G2QNU7     | 41.67% |
| Lis2217   | 2  | 3 first hsp are Euka           | <i>Brugia timori</i>              | Hybrid signal transduction histidine kinase J | Q54YZ9     | 39.53% |
| Lis2218   | 2  | ratio Euka/Proka : 95.0 / 5.0  | <i>Pythium ultimum</i>            | Putative oxidoreductase                       | A0A0R3QW57 | 41.91% |
| Lis2789   | 1  | ratio Euka/Proka : 80.0 / 20.0 | <i>Rhizoctonia solani</i>         | -                                             | K3WR86     | 31.48% |
| Lis2901   | 4  | 1 first hsp is Euka            | <i>Daphnia pulex</i>              | Phosphatidylcholine-hydrolyzing               | A0A074RWD3 | 36.27% |
| Lis2956   | 13 | 3 first hsp are Euka           | <i>Medicago truncatula</i>        | phospholipase C                               | E9HWS5     | 49.37% |
| Lis2997   | 1  | 3 first hsp are Euka           | <i>Nematostella vectensis</i>     | -                                             | G7LHI8     | 68.52% |
| Lja1163   | 1  | 3 first hsp are Euka           | <i>Conidiobolus coronatus</i>     | -                                             | A7SID6     | 38.89% |
| Llo981117 | 6  | 1 first hsp is Euka            | <i>Neonectria ditissima</i>       | Carbohydrate esterase family 16 protein       | A0A137NUQ3 | 36.52% |
| Llo981203 | 5  | ratio Euka/Proka : 95.0 / 5.0  | <i>Brassica napus</i>             | -                                             | A0A0P7BH29 | 31.10% |
|           |    |                                |                                   | BnaA02g03420D protein                         | A0A078D861 | 30.26% |

|           |   |                                |                                     |                                                            |            |         |
|-----------|---|--------------------------------|-------------------------------------|------------------------------------------------------------|------------|---------|
| Llo981314 | 4 | 3 first hsp are Euka           | <i>Musa acuminata</i>               | -                                                          | M0SNM2     | 32.86%  |
| Llo981993 | 4 | 3 first hsp are Euka           | <i>Metarhizium robertsii</i>        | Peptide hydrolase                                          | A0A0A1US54 | 39.69%  |
| Llo981994 | 4 | 3 first hsp are Euka           | <i>Trichosporon asahii</i>          | Peptide hydrolase                                          | K1VCD4     | 50.53%  |
| Llo982493 | 1 | 2 first hsp are Euka           | <i>Glycine soja</i>                 | Pentatricopeptide repeat-containing protein, mitochondrial | A0A0B2RBR6 | 34.69%  |
| LloAT0689 | 3 | 1 first hsp is Euka            | <i>Acanthamoeba castellanii</i>     | Eukaryotic family protein                                  | L8HFQ5     | 34.51%  |
| Llon2243  | 1 | 3 first hsp are Euka           | <i>Laccaria amethystina</i>         | -                                                          | A0A0C9X1S9 | 30.50%  |
| Lma0061   | 1 | 3 first hsp are Euka           | <i>Heterocephalus glaber</i>        | -                                                          | G5C4L0     | 32.84%  |
| Lma1087   | 1 | 3 first hsp are Euka           | <i>Amphimedon queenslandica</i>     | -                                                          | I1E862     | 53.12%  |
| Lma2959   | 4 | 1 first hsp is Euka            | <i>Dictyostelium lacteum</i>        | -                                                          | A0A151ZFY4 | 30.08%  |
| LmasA0938 | 2 | 2 first hsp are Euka           | <i>Eucalyptus grandis</i>           | -                                                          | A0A059BD11 | 30.43%  |
| LmasA1109 | 3 | 2 first hsp are Euka           | <i>Nematostella vectensis</i>       | Leucine-rich repeat-containing protein 34                  | A7SML2     | 37.39%  |
| LmasA2772 | 3 | 3 first hsp are Euka           | <i>Sphaerulina musiva</i>           | -                                                          | M3CKV8     | 30.80%  |
| LmasA3802 | 2 | ratio Euka/Proka : 80.0 / 20.0 | <i>Triticum aestivum</i>            | -                                                          | W5A8A8     | 37.86%  |
| Lmo0476   | 2 | 3 first hsp are Euka           | <i>Naegleria gruberi</i>            | Eukaryotic family protein                                  | D2VXH5     | 36.14%  |
| Lna2633   | 1 | 3 first hsp are Euka           | <i>Strongyloides papillosus</i>     | Similar to Minor spike protein H acc. no. P03646           | A0A0N5C599 | 100.00% |
| Lna2642   | 1 | 3 first hsp are Euka           | <i>Chrysochromulina sp. CCMP291</i> | -                                                          | A0A0M0JE43 | 34.56%  |
| Lno0580   | 1 | ratio Euka/Proka : 80.0 / 20.0 | <i>Musa acuminata</i>               | -                                                          | M0RQC7     | 50.90%  |
| LoakA0377 | 1 | 3 first hsp are Euka           | <i>Medicago truncatula</i>          | -                                                          | G7LHI8     | 70.37%  |
| LoakA0667 | 1 | 3 first hsp are Euka           | <i>Lucilia cuprina</i>              | -                                                          | A0A0L0C8R3 | 39.13%  |
| LoakA0772 | 2 | 3 first hsp are Euka           | <i>Calocera viscosa</i>             | -                                                          | A0A167JNM4 | 43.52%  |
| LoakA1610 | 1 | 1 first hsp is Euka            | <i>Chrysochromulina sp. CCMP291</i> | -                                                          | A0A0M0JJJ8 | 34.12%  |
| LoakA2509 | 1 | 3 first hsp are Euka           | <i>Medicago truncatula</i>          | -                                                          | G7LHI8     | 70.37%  |
| LoakA2834 | 1 | ratio Euka/Proka : 80.0 / 20.0 | <i>Rhizophagus irregularis</i>      | Peptide hydrolase                                          | U9UT29     | 43.48%  |
| LoakB1951 | 1 | 3 first hsp are Euka           | <i>Emmonsia crescens</i>            | Saccharopine dehydrogenase [NAD(+), L-lysine-forming]      | A0A0G2J7R7 | 37.76%  |
| Loas1699  | 1 | ratio Euka/Proka : 95.0 / 5.0  | <i>Gallus gallus</i>                | -                                                          | H9KZ13     | 31.10%  |
| Loas2397  | 1 | 3 first hsp are Euka           | <i>Tetranychus urticae</i>          | -                                                          | T1KEY0     | 37.02%  |
| Loas2810  | 1 | 3 first hsp are Euka           | <i>Oxytricha trifallax</i>          | -                                                          | J9EKJ8     | 47.89%  |
| Loas2860  | 1 | 1 first hsp is Euka            | <i>Canis lupus</i>                  | -                                                          | F1PNP2     | 37.58%  |

|            |    |                                |                                     |                                                               |            |        |
|------------|----|--------------------------------|-------------------------------------|---------------------------------------------------------------|------------|--------|
| Lp130b1550 | 1  | ratio Euka/Proka : 85.0 / 15.0 | <i>Arthroderma gypseum</i>          | Phosphatidylcholine-hydrolyzing phospholipase C               | E5R3V7     | 32.89% |
| Lp570C192  | 7  | 3 first hsp are Euka           | <i>Chrysochromulina sp. CCMP291</i> | -                                                             | A0A0M0JNB0 | 31.50% |
| LpAlc2551  | 4  | 3 first hsp are Euka           | <i>Brassica napus</i>               | BnaC08g38470D protein                                         | A0A078D0I7 | 41.38% |
| LpAlc3049  | 1  | ratio Euka/Proka : 90.0 / 10.0 | <i>Perkinsus marinus</i>            | -                                                             | C5LIX6     | 54.30% |
| LpFRA0929  | 2  | 3 first hsp are Euka           | <i>Physcomitrella patens</i>        | -                                                             | A9U8F6     | 46.79% |
| LpFRA0930  | 1  | 3 first hsp are Euka           | <i>Physcomitrella patens</i>        | -                                                             | A9U8F6     | 50.00% |
| LpFRAC073  | 6  | 3 first hsp are Euka           | <i>Oreochromis niloticus</i>        | -                                                             | I3K3J7     | 34.31% |
| LpFRAC108  | 3  | 3 first hsp are Euka           | <i>Salpingoeca rosetta</i>          | Collagen type III alpha 1                                     | F2UI75     | 56.59% |
| lpg0306    | 1  | ratio Euka/Proka : 80.0 / 20.0 | <i>Brugia timori</i>                | -                                                             | A0A0R3RDH7 | 53.85% |
| lpg0573    | 1  | ratio Euka/Proka : 80.0 / 20.0 | <i>Brugia timori</i>                | -                                                             | A0A0R3RDH7 | 53.85% |
| lpg2750    | 1  | ratio Euka/Proka : 80.0 / 20.0 | <i>Brugia timori</i>                | -                                                             | A0A0R3RDH7 | 53.85% |
| lpl0592a   | 1  | 3 first hsp are Euka           | <i>Aspergillus nomius</i>           | -                                                             | A0A0L11TU8 | 44.71% |
| lpl2493    | 2  | 1 first hsp is Euka            | <i>Amphimedon queenslandica</i>     | -                                                             | I1EU16     | 37.02% |
| LPOv2_303  | 8  | 3 first hsp are Euka           | <i>Beta vulgaris</i>                | -                                                             | A0A0J7YMC9 | 75.44% |
| lpp0208    | 6  | 1 first hsp is Euka            | <i>Vitis vinifera</i>               | -                                                             | D7T2M7     | 30.42% |
| lpp0489    | 62 | 3 first hsp are Euka           | <i>Spizellomyces punctatus</i>      | -                                                             | A0A0L0HQ56 | 42.00% |
| lpp0517    | 80 | 3 first hsp are Euka           | <i>Chrysochromulina sp. CCMP291</i> | -                                                             | A0A0M0JE43 | 34.57% |
| lpp0565    | 20 | ratio Euka/Proka : 80.0 / 20.0 | <i>Arthroderma gypseum</i>          | Phosphatidylcholine-hydrolyzing phospholipase C               | E5R3V7     | 35.10% |
| lpp0578    | 33 | 3 first hsp are Euka           | <i>Nectria haematococca</i>         | Phytanoyl-CoA dioxygenase domain-containing protein, putative | C7YR76     | 32.68% |
| lpp1120    | 49 | 3 first hsp are Euka           | <i>Takifugu rubripes</i>            | Lysosomal acid phosphatase                                    | H2THN8     | 31.23% |
| lpp1145    | 28 | 3 first hsp are Euka           | <i>Anolis carolinensis</i>          | -                                                             | H9GI25     | 30.26% |
| lpp1157    | 40 | ratio Euka/Proka : 95.0 / 5.0  | <i>Solanum tuberosum</i>            | -                                                             | M1CZC6     | 51.33% |
| lpp1192    | 77 | 3 first hsp are Euka           | <i>Phaseolus vulgaris</i>           | -                                                             | V7AMS5     | 40.69% |
| lpp1405    | 12 | 3 first hsp are Euka           | <i>Pseudocohnilembus persalinus</i> | -                                                             | A0A0V0QNF5 | 42.68% |
| lpp1411    | 39 | ratio Euka/Proka : 80.0 / 20.0 | <i>Arthroderma gypseum</i>          | Phosphatidylcholine-hydrolyzing phospholipase C               | E5R3V7     | 33.88% |
| lpp1522    | 53 | ratio Euka/Proka : 85.0 / 15.0 | <i>Pythium ultimum</i>              | -                                                             | K3WEM6     | 59.87% |

|                 |    |                                |                                 |                                                                                    |            |        |
|-----------------|----|--------------------------------|---------------------------------|------------------------------------------------------------------------------------|------------|--------|
| lpp1644         | 65 | 3 first hsp are Euka           | <i>Phytophthora parasitica</i>  | Phosphoribosylamine-glycine ligase                                                 | W2YH10     | 57.30% |
| lpp1647         | 65 | ratio Euka/Proka : 90.0 / 10.0 | <i>Volvox carteri</i>           | -                                                                                  | D8UJM7     | 62.09% |
| lpp1709         | 72 | 2 first hsp are Euka           | <i>Thelazia callipaeda</i>      | -                                                                                  | A0A0N5D1E5 | 30.47% |
| lpp2128         | 31 | 3 first hsp are Euka           | <i>Astyanax mexicanus</i>       | -                                                                                  | W5KB35     | 39.20% |
| lpp3022         | 80 | ratio Euka/Proka : 90.0 / 10.0 | <i>Phytophthora ramorum</i>     | Cystathionine beta-synthase<br>Putative ser thr protein phosphatase family protein | H3G9B2     | 64.09% |
| Lqua0433        | 1  | 3 first hsp are Euka           | <i>Botryosphaeria parva</i>     | -                                                                                  | R1ERS2     | 46.77% |
| Lqua2316        | 1  | 3 first hsp are Euka           | <i>Columba livia</i>            | Glutamine-rich protein 2                                                           | R7VT40     | 38.57% |
| Lqua2379        | 1  | 3 first hsp are Euka           | <i>Branchiostoma floridae</i>   | -                                                                                  | C3ZUS6     | 34.62% |
| Lqua2577        | 1  | 3 first hsp are Euka           | <i>Jatropha curcas</i>          | -                                                                                  | A0A067KAT5 | 53.75% |
| Lqua2684        | 1  | 3 first hsp are Euka           | <i>Penicillium rubens</i>       | Pc21g03600 protein                                                                 | B6HLH6     | 41.46% |
| Lquin0909       | 1  | 3 first hsp are Euka           | <i>Strigamia maritima</i>       | -                                                                                  | T1IW32     | 69.84% |
| Lquin1163       | 1  | 3 first hsp are Euka           | <i>Strongyloides papillosus</i> | UMP-CMP kinase                                                                     | A0A0N5BSX5 | 30.73% |
| Lquin1672       | 1  | 2 first hsp are Euka           | <i>Saprolegnia parasitica</i>   | -                                                                                  | A0A067CH58 | 30.19% |
| Lquin3025       | 1  | ratio Euka/Proka : 90.0 / 10.0 | <i>Phytophthora parasitica</i>  | -                                                                                  | W2Y2U5     | 38.29% |
| Lquin3041       | 1  | 1 first hsp is Euka            | <i>Glarea lozoyensis</i>        | ALDH-like protein                                                                  | S3E1F7     | 35.27% |
| Lrow1308        | 1  | 3 first hsp are Euka           | <i>Dactylellina haptotyla</i>   | -                                                                                  | S8C2R2     | 49.55% |
| Lrub0638        | 1  | 3 first hsp are Euka           | <i>Hordeum vulgare</i>          | Ent-copalyl diphosphate synthase 1,<br>chloroplastic                               | M0XE17     | 39.00% |
| Lrub0759        | 1  | 3 first hsp are Euka           | <i>Hymenolepis microstoma</i>   | Dual specificity protein phosphatase 14                                            | A0A068XAT5 | 39.81% |
| Lrub2305        | 1  | ratio Euka/Proka : 85.0 / 15.0 | <i>Talaromyces islandicus</i>   | -                                                                                  | A0A0U1LKR4 | 57.45% |
| Lrub2306        | 3  | 3 first hsp are Euka           | <i>Xenopus tropicalis</i>       | -                                                                                  | A0A1B8XY96 | 42.28% |
| Lsain3451       | 1  | 3 first hsp are Euka           | <i>Trichosporon asahii</i>      | Peptide hydrolase                                                                  | K1VCD4     | 39.01% |
| Lsan0032        | 1  | 3 first hsp are Euka           | <i>Glarea lozoyensis</i>        | DHS-like NAD/FAD-binding protein                                                   | S3CWH8     | 30.83% |
| Lsan1783        | 1  | 3 first hsp are Euka           | <i>Entamoeba histolytica</i>    | Vesicle-fusing ATPase putative                                                     | C4LYS4     | 32.43% |
| Lsan2473        | 1  | 3 first hsp are Euka           | <i>Culex quinquefasciatus</i>   | -                                                                                  | B0W8D6     | 61.79% |
| Lsan3225        | 1  | ratio Euka/Proka : 80.0 / 20.0 | <i>Dracunculus medinensis</i>   | -                                                                                  | A0A0N4UBC6 | 35.22% |
| Lsan3934        | 1  | 3 first hsp are Euka           | <i>Poecilia formosa</i>         | -                                                                                  | A0A087YDD8 | 31.05% |
| LshaDSM12<br>29 | 1  | 3 first hsp are Euka           | <i>Acromyrmex echinatior</i>    | Salivary glue protein Sgs-4                                                        | F4X351     | 40.35% |
| LshaDSM27<br>23 | 1  | ratio Euka/Proka : 85.0 / 15.0 | <i>Trichomonas vaginalis</i>    | Cytidyltransferase-related domain containing<br>protein                            | A2FRN2     | 30.72% |

|           |   |                                |                                     |                                                     |            |        |  |
|-----------|---|--------------------------------|-------------------------------------|-----------------------------------------------------|------------|--------|--|
| LshaDSM29 |   |                                |                                     |                                                     |            |        |  |
| 48        | 1 | ratio Euka/Proka : 88.9 / 11.1 | <i>Trichophyton interdigitale</i>   | -                                                   | A0A059J360 | 36.84% |  |
| Lspi0963  | 1 | 3 first hsp are Euka           | <i>Rhizophagus irregularis</i>      | Ack1p                                               | U9SN83     | 31.89% |  |
| Lspi2104  | 1 | 3 first hsp are Euka           | <i>Rhizophagus irregularis</i>      | Cdc15p                                              | A0A015LMF8 | 31.91% |  |
| Lstei0649 | 1 | 3 first hsp are Euka           | <i>Hypholoma sublateritium</i>      | Peptide hydrolase                                   | A0A0D2PHP7 | 35.65% |  |
| Lstei0663 | 1 | 3 first hsp are Euka           | <i>Oryza sativa</i>                 | -                                                   | B8AZ42     | 43.62% |  |
| Ltau1785  | 1 | 1 first hsp is Euka            | <i>Salpingoeca rosetta</i>          | Glyoxalase/bleomycin resistance protein/dioxygenase | F2U941     | 31.90% |  |
| Lwad1781  | 1 | 3 first hsp are Euka           | <i>Papilio xuthus</i>               | -                                                   | A0A194PU65 | 44.04% |  |
| Lwad3230  | 1 | 3 first hsp are Euka           | <i>Nematostella vectensis</i>       | -                                                   | A7SL81     | 37.36% |  |
| Lwal0228  | 1 | 3 first hsp are Euka           | <i>Conidiobolus coronatus</i>       | -                                                   | A0A137NX20 | 38.04% |  |
| Lwal0984  | 1 | 3 first hsp are Euka           | <i>Gonapodya prolifera</i>          | ISP domain-containing protein                       | A0A139ASQ0 | 35.57% |  |
| Lwal1518  | 1 | 2 first hsp are Euka           | <i>Pristionchus pacificus</i>       | -                                                   | H3EDZ4     | 30.59% |  |
| Lwal1809  | 1 | 3 first hsp are Euka           | <i>Pseudocohnilembus persalinus</i> | Kinase domain protein                               | A0A0V0QC22 | 32.72% |  |
| Lwal1928  | 1 | 3 first hsp are Euka           | <i>Tetrahymena thermophila</i>      | Serine/Threonine kinase domain protein              | X1W3P2     | 33.27% |  |
| Lwal2580  | 1 | ratio Euka/Proka : 85.0 / 15.0 | <i>Pythium ultimum</i>              | -                                                   | K3WEM6     | 44.81% |  |
| Lwal2592  | 1 | 3 first hsp are Euka           | <i>Capsaspora owczarzaki</i>        | -                                                   | A0A0D2WI15 | 38.22% |  |
| Lwor1242  | 1 | 3 first hsp are Euka           | <i>Rhizophagus irregularis</i>      | Skt5p                                               | A0A015JE96 | 41.46% |  |
| Lwor1271  | 1 | 3 first hsp are Euka           | <i>Naegleria gruberi</i>            | -                                                   | D2W4W1     | 40.00% |  |
| Lya2270   | 1 | 3 first hsp are Euka           | <i>Thalassiosira pseudonana</i>     | Sphingosine-1-phosphate lyase 1                     | B8C894     | 39.58% |  |
| Lya2481   | 1 | 3 first hsp are Euka           | <i>Chlamydomonas reinhardtii</i>    | -                                                   | A8JHK1     | 31.65% |  |

<sup>1</sup>Protein label representing an orthologous group; <sup>2</sup> indicates the number of proteins contained in the corresponding orthologous group; <sup>3</sup> criteria for considering that the corresponding protein is an eukaryotic like protein; <sup>4</sup> organism of the first eukaryotic hit against the *Legionella* protein; <sup>5</sup> Annotation given for the first eukaryotic hit (hypothetical or unknown functions have not been taken into account); <sup>6</sup> corresponding accession number; <sup>7</sup> percentage of identity of this first hit with the respective *Legionella* protein.

**Table S6. Aminoacid identity of the Dot/Icm components with respect to orthologous proteins in *L. pneumophila* Paris**

|               | <i>icmT</i> | <i>icmS</i> | <i>icmR</i> | <i>icmQ</i> | <i>icmP</i> | <i>icmO</i> | <i>icm</i>  | <i>icmM</i> | <i>icmL</i> | <i>icmK</i> | <i>icmE</i> | <i>icmG</i> | <i>icmC</i> | <i>icmD</i> | <i>icmJ</i> | <i>icmB</i> | <i>icm</i>  |             | <i>lvgA</i> | <i>dotD</i> | <i>dotC</i> | <i>dotB</i> | <i>dotA</i> | <i>icmV</i> | <i>icmW</i> | <i>icmX</i> |      |
|---------------|-------------|-------------|-------------|-------------|-------------|-------------|-------------|-------------|-------------|-------------|-------------|-------------|-------------|-------------|-------------|-------------|-------------|-------------|-------------|-------------|-------------|-------------|-------------|-------------|-------------|-------------|------|
| <i>Lpp*</i>   | 0507        | 0508        | 0509        | 0510        | <i>dotM</i> | <i>dotL</i> | <i>dotK</i> | <i>dotJ</i> | <i>dotI</i> | <i>dotH</i> | <i>dotG</i> | <i>dotF</i> | <i>dotE</i> | <i>dotP</i> | <i>dotN</i> | <i>dotO</i> | <i>icmF</i> | <i>dotU</i> | <i>dotV</i> | 0590        | 2728        | 2729        | 2730        | 2740        | 2741        | 2742        | 2743 |
| <i>LadeS</i>  | 87%         | 82%         |             | 63%         | 70%         | 83%         | 56%         | 48%         | 84%         | 65%         | 53%         | 45%         | 66%         | 68%         | 80%         | 84%         | 56%         | 56%         | 49%         | 64%         | 78%         | 69%         | 89%         | 51%         | 60%         | 85%         | 39%  |
| <i>LanA</i>   |             | 90%         |             | 69%         | 77%         | 88%         | 67%         | 61%         | 93%         | 72%         | 65%         | 51%         | 77%         | 82%         | 83%         | 86%         | 75%         | 73%         | 67%         | 64%         | 81%         | 80%         | 93%         | 51%         | 69%         | 90%         | 37%  |
| <i>LanB</i>   |             | 90%         |             | 69%         | 77%         | 88%         | 67%         | 61%         | 93%         | 72%         | 73%         | 51%         | 77%         | 82%         | 83%         | 86%         | 75%         | 73%         | 67%         | 64%         | 81%         | 80%         | 93%         | 53%         | 69%         | 90%         | 37%  |
| <i>Lbe</i>    | 81%         | 89%         |             | 49%         | 72%         | 85%         | 51%         | 52%         | 84%         | 85%         | 54%         | 41%         | 63%         | 66%         | 82%         | 83%         | 55%         | 57%         | 56%         | 59%         | 75%         | 70%         | 89%         | 48%         | 54%         | 81%         | 42%  |
| <i>Lbir</i>   |             | 90%         |             | 62%         | 73%         | 85%         | 52%         | 49%         | 84%         | 70%         | 55%         | 42%         | 69%         | 75%         | 82%         | 86%         | 56%         | 59%         | 61%         | 61%         | 74%         | 72%         | 93%         | 54%         | 62%         | 84%         | 47%  |
| <i>LboA</i>   |             | 90%         |             | 67%         | 77%         | 89%         | 68%         | 62%         | 93%         | 71%         | 74%         | 52%         | 77%         | 82%         | 83%         | 87%         | 75%         | 74%         | 71%         | 65%         | 81%         | 81%         | 93%         | 56%         | 69%         | 90%         | 39%  |
| <i>LboB</i>   |             | 90%         |             | 66%         | 77%         | 89%         | 68%         | 62%         | 93%         | 71%         | 74%         | 53%         | 77%         | 81%         | 83%         | 87%         | 75%         | 74%         | 71%         | 65%         | 81%         | 80%         | 93%         | 56%         | 69%         | 90%         | 39%  |
| <i>Lbru</i>   | 82%         | 87%         |             | 54%         | 73%         | 86%         | 65%         | 54%         | 85%         | 86%         | 58%         | 38%         | 64%         | 71%         | 83%         | 86%         | 56%         | 60%         | 61%         | 65%         | 77%         | 76%         | 92%         | 52%         | 57%         | 85%         | 40%  |
| <i>Lbu</i>    | 82%         | 86%         |             | 49%         | 72%         | 84%         | 50%         | 54%         | 83%         | 82%         | 54%         | 38%         | 65%         | 66%         | 82%         | 83%         | 55%         | 57%         | 54%         | 61%         | 77%         | 71%         | 88%         | 48%         | 49%         | 81%         | 42%  |
| <i>Lche</i>   |             | 89%         |             | 60%         | 77%         | 89%         | 67%         |             | 92%         | 71%         | 74%         | 52%         | 79%         | 79%         | 85%         | 87%         | 75%         | 74%         | 72%         | 63%         | 83%         | 77%         | 94%         | 55%         | 64%         | 90%         | 41%  |
| <i>Lci</i>    | 84%         | 90%         |             | 68%         | 78%         | 88%         | 66%         | 56%         | 91%         | 71%         | 0%          | 54%         | 75%         | 79%         | 85%         | 87%         | 72%         | 72%         | 71%         | 60%         | 83%         | 80%         | 93%         | 47%         | 59%         | 91%         | 48%  |
| <i>Ldra</i>   | 86%         | 90%         |             | 65%         | 79%         | 89%         | 65%         |             | 94%         | 74%         | 0%          | 54%         | 80%         | 81%         | 85%         | 88%         | 72%         | 75%         | 66%         | 68%         | 81%         | 81%         | 93%         | 58%         | 63%         | 90%         | 50%  |
| <i>Ldro</i>   | 85%         | 85%         |             | 58%         | 73%         | 85%         | 55%         | 57%         | 86%         | 80%         | 62%         | 43%         | 70%         | 73%         | 82%         | 86%         | 56%         | 57%         | 55%         | 64%         | 84%         | 70%         | 93%         | 55%         | 62%         | 83%         | 43%  |
| <i>LduN23</i> | 82%         | 89%         |             | 65%         | 77%         | 89%         | 66%         | 67%         | 91%         | 72%         | 72%         | 51%         | 79%         | 79%         | 85%         | 87%         | 74%         | 73%         | 70%         | 65%         | 81%         | 80%         | 94%         | 55%         | 68%         | 89%         | 42%  |
| <i>LduTex</i> | 82%         | 89%         |             | 65%         | 77%         | 89%         | 66%         | 67%         | 91%         | 72%         | 0%          | 51%         | 79%         | 79%         | 85%         | 87%         | 74%         | 73%         | 70%         | 65%         | 81%         | 80%         | 94%         | 55%         | 68%         | 89%         | 42%  |
| <i>Lery</i>   | 86%         | 87%         |             | 56%         | 74%         | 87%         | 62%         | 51%         | 75%         | 71%         | 65%         | 43%         | 69%         | 71%         | 83%         | 85%         | 54%         | 55%         | 51%         | 60%         | 83%         | 75%         | 94%         | 54%         | 64%         | 82%         | 44%  |
| <i>Lfair</i>  |             | 87%         |             | 53%         | 72%         | 85%         | 61%         |             | 87%         | 86%         | 59%         | 47%         | 66%         | 73%         | 84%         | 86%         | 56%         | 57%         | 54%         | 67%         | 80%         | 75%         | 93%         | 50%         | 58%         | 82%         | 43%  |
| <i>LFav2</i>  | 87%         | 93%         |             | 72%         | 81%         | 89%         | 70%         | 67%         | 92%         | 77%         | 77%         | 59%         | 80%         | 75%         | 89%         | 88%         | 77%         | 79%         | 69%         | 67%         | 85%         | 83%         | 94%         | 57%         | 69%         | 93%         | 52%  |
| <i>Lfee</i>   | 88%         | 90%         |             | 62%         | 73%         | 86%         | 59%         |             | 89%         | 83%         | 65%         | 45%         | 67%         | 76%         | 85%         | 88%         | 57%         | 59%         | 62%         | 59%         | 83%         | 75%         | 93%         | 53%         | 65%         | 82%         | 46%  |
| <i>Lge</i>    |             | 90%         |             | 62%         | 71%         | 84%         | 54%         | 51%         | 84%         | 69%         | 56%         | 47%         | 68%         | 71%         | 81%         | 85%         | 56%         | 59%         | 61%         | 60%         | 74%         | 72%         | 93%         | 54%         | 60%         | 83%         | 45%  |
| <i>Lges</i>   | 85%         | 79%         |             | 50%         | 67%         | 81%         | 55%         | 50%         | 84%         | 73%         | 49%         | 40%         | 57%         | 57%         | 75%         | 82%         | 48%         | 53%         | 47%         | 42%         | 74%         | 73%         | 88%         | 52%         | 52%         | 77%         | 43%  |
| <i>LgoA</i>   |             | 89%         |             | 64%         | 76%         | 88%         | 68%         | 61%         | 94%         | 71%         | 71%         | 54%         | 76%         | 80%         | 84%         | 87%         | 74%         | 73%         | 70%         | 64%         | 83%         | 81%         | 94%         | 58%         | 66%         | 89%         | 41%  |
| <i>LgoB</i>   | 82%         | 89%         |             | 64%         | 76%         | 88%         | 68%         | 61%         | 94%         | 71%         | 71%         | 54%         | 76%         | 80%         | 84%         | 87%         | 74%         | 73%         | 70%         | 64%         | 83%         | 81%         | 94%         | 58%         | 66%         | 89%         | 42%  |
| <i>Lgra</i>   | 84%         | 88%         |             | 67%         | 79%         | 87%         | 63%         | 60%         | 92%         | 68%         | 0%          | 52%         | 76%         | 76%         | 85%         | 87%         | 73%         | 72%         | 72%         | 61%         | 83%         | 80%         | 94%         | 49%         | 61%         | 91%         | 47%  |
| <i>Lgre</i>   | 85%         | 86%         |             | 51%         | 72%         | 84%         | 54%         | 53%         | 83%         | 82%         | 54%         | 39%         | 66%         | 66%         | 82%         | 83%         | 55%         | 58%         | 55%         | 62%         | 76%         | 70%         | 89%         | 48%         | 50%         | 82%         | 42%  |
| <i>LHAV2</i>  | 87%         | 89%         |             | 61%         | 71%         | 85%         | 66%         | 57%         | 86%         | 87%         | 59%         | 41%         | 66%         | 71%         | 83%         | 86%         | 55%         | 60%         | 59%         | 65%         | 77%         | 74%         | 92%         | 0%          | 54%         | 84%         | 43%  |
| <i>Lim</i>    | 88%         | 86%         |             | 61%         | 70%         | 84%         | 54%         | 51%         | 85%         | 69%         | 53%         | 40%         | 67%         | 65%         | 80%         | 83%         | 52%         | 57%         | 51%         | 58%         | 78%         | 73%         | 89%         | 51%         | 57%         | 80%         | 42%  |

|                 |      |      |     |     |     |      |     |     |      |     |      |     |      |     |      |      |     |      |      |     |      |      |      |     |     |      |     |
|-----------------|------|------|-----|-----|-----|------|-----|-----|------|-----|------|-----|------|-----|------|------|-----|------|------|-----|------|------|------|-----|-----|------|-----|
| <i>Lis</i>      | 78%  | 83%  |     | 60% | 77% | 86%  | 64% | 51% | 88%  | 73% | 68%  | 41% | 73%  | 70% | 83%  | 85%  | 54% | 60%  | 62%  | 62% | 79%  | 70%  | 92%  | 55% | 58% | 83%  | 50% |
| <i>Lja</i>      | 83%  | 89%  |     | 57% | 73% | 86%  | 62% | 56% | 86%  | 87% | 60%  | 39% | 67%  | 72% | 85%  | 87%  | 55% | 59%  | 57%  | 63% | 0%   | 76%  | 92%  | 53% | 53% | 83%  | 45% |
| <i>Ljor</i>     | 85%  | 85%  |     | 56% | 72% | 86%  | 63% | 55% | 86%  | 85% | 64%  | 41% | 68%  | 71% | 84%  | 87%  | 55% | 57%  | 55%  | 61% | 76%  | 77%  | 92%  | 53% | 57% | 83%  | 43% |
| <i>Llan</i>     | 84%  | 87%  |     | 59% | 72% | 85%  | 63% | 54% | 87%  | 72% | 64%  | 40% | 66%  | 72% | 87%  | 87%  | 56% | 60%  | 54%  | 61% | 74%  | 78%  | 90%  | 54% | 54% | 84%  | 45% |
| <i>Llikebru</i> | 88%  | 88%  |     | 60% | 73% | 85%  | 60% | 51% | 85%  | 84% | 63%  | 40% | 69%  | 79% | 85%  | 88%  | 56% | 59%  | 55%  | 61% | 79%  | 77%  | 92%  | 53% | 56% | 83%  | 42% |
| <i>Llo98</i>    | 83%  | 92%  |     | 69% | 78% | 87%  | 66% | 59% | 92%  | 72% | 0%   | 53% | 75%  | 80% | 85%  | 87%  | 72% | 71%  | 71%  | 60% | 83%  | 79%  | 93%  | 51% | 57% | 92%  | 48% |
| <i>LloAT</i>    | 83%  | 92%  |     | 69% | 78% | 87%  | 66% | 59% | 92%  | 72% | 0%   | 53% | 75%  | 80% | 85%  | 87%  | 72% | 71%  | 71%  | 60% | 83%  | 80%  | 93%  | 51% | 57% | 91%  | 47% |
| <i>LloD4968</i> | 83%  | 92%  |     | 69% | 78% | 87%  | 66% | 59% | 92%  | 86% | 0%   | 53% | 75%  | 80% | 85%  | 87%  | 72% | 71%  | 71%  | 60% | 84%  | 80%  | 93%  | 51% | 57% | 91%  | 47% |
| <i>Llon</i>     | 85%  | 87%  |     | 62% | 70% | 82%  | 55% | 47% | 85%  | 70% | 57%  | 45% | 69%  | 67% | 82%  | 83%  | 51% | 51%  | 52%  | 63% | 75%  | 73%  | 88%  | 54% | 54% | 83%  | 46% |
| <i>LloNSW</i>   | 83%  | 92%  |     | 69% | 78% | 87%  | 69% | 59% | 92%  | 72% | 0%   | 53% | 75%  | 80% | 85%  | 87%  | 72% | 71%  | 71%  | 60% | 83%  | 80%  | 93%  | 51% | 57% | 91%  | 47% |
| <i>Lma</i>      | 88%  | 87%  |     | 58% | 73% | 86%  | 58% | 55% | 89%  | 78% | 63%  | 48% | 66%  |     | 86%  | 86%  | 57% | 56%  | 53%  | 62% | 83%  | 70%  | 93%  | 53% | 59% | 85%  | 43% |
| <i>LmasB</i>    |      | 86%  |     | 56% | 73% | 86%  | 56% | 49% | 84%  | 81% | 64%  | 42% | 62%  | 60% | 84%  | 84%  | 57% | 58%  | 56%  | 67% | 81%  | 72%  | 92%  | 51% | 55% | 85%  | 40% |
| <i>LmasA</i>    |      | 86%  |     | 56% | 73% | 86%  | 56% | 49% | 84%  | 81% | 64%  | 42% | 62%  | 60% | 84%  | 84%  | 57% | 58%  | 56%  | 67% | 81%  | 72%  | 92%  | 51% | 55% | 85%  | 40% |
| <i>Lmic</i>     | 86%  | 87%  |     | 57% | 75% | 85%  | 59% | 56% | 88%  | 76% | 64%  | 46% | 67%  | 68% | 85%  | 86%  | 57% | 57%  | 51%  | 62% | 84%  | 70%  | 92%  | 52% | 60% | 85%  | 42% |
| <i>LmicB</i>    |      | 87%  |     | 57% | 75% | 85%  | 59% | 56% | 88%  | 76% | 64%  | 46% | 67%  | 68% | 85%  | 86%  | 58% | 57%  | 51%  | 62% | 84%  | 70%  | 92%  | 52% | 60% | 85%  |     |
| <i>Lmo</i>      | 87%  | 90%  |     | 78% | 82% | 91%  | 73% |     | 91%  | 77% | 80%  | 62% | 75%  | 77% | 91%  | 89%  | 76% | 84%  | 73%  | 73% | 84%  | 88%  | 96%  | 63% | 72% | 93%  | 49% |
| <i>Lna</i>      | 85%  | 89%  |     | 69% | 72% | 85%  | 59% | 43% | 83%  | 73% | 0%   | 45% | 66%  | 63% | 81%  | 83%  | 56% | 56%  | 52%  | 66% | 78%  | 73%  | 89%  | 51% | 52% | 81%  | 37% |
| <i>Lnau</i>     | 87%  | 87%  |     | 59% | 74% | 85%  | 54% | 53% | 87%  | 83% | 63%  | 42% | 69%  | 70% | 82%  | 86%  | 57% | 56%  | 56%  | 64% | 85%  | 72%  | 94%  | 54% | 60% | 84%  | 42% |
| <i>Lno</i>      | 94%  | 96%  | 48% | 86% | 88% | 94%  | 87% | 74% | 97%  | 81% | 84%  | 79% | 87%  | 85% | 94%  | 94%  | 0%  | 90%  | 88%  | 79% | 93%  | 95%  | 98%  | 72% | 83% | 97%  |     |
| <i>LoakA</i>    | 85%  | 88%  |     | 63% | 70% | 84%  | 56% | 46% | 83%  | 73% | 59%  | 37% | 66%  | 66% | 83%  | 84%  | 56% | 56%  | 54%  | 61% | 79%  | 75%  | 89%  | 51% | 52% | 80%  | 36% |
| <i>LoakB</i>    | 85%  | 88%  |     | 63% | 70% | 84%  | 56% | 46% | 83%  | 73% | 66%  | 46% | 66%  | 66% | 83%  | 84%  | 56% | 56%  | 0%   | 61% | 77%  | 75%  | 89%  | 51% | 52% | 80%  | 36% |
| <i>Loas</i>     | 83%  | 74%  |     | 54% | 64% | 77%  | 59% | 33% | 69%  | 70% | 63%  | 37% | 67%  | 66% | 72%  | 80%  | 34% | 36%  | 44%  | 54% | 69%  | 69%  | 86%  | 52% | 50% | 71%  | 40% |
| <i>Lp130b</i>   |      | 100% | 98% | 99% | 99% | 100% | 99% | 95% | 100% | 99% | 100% | 99% | 100% | 99% | 100% | 100% | 99% | 100% | 100% | 99% | 99%  | 86%  | 100% | 99% | 99% | 100% | 85% |
| <i>Lp570C</i>   |      | 100% | 97% | 99% | 99% | 100% | 99% | 97% | 100% | 99% | 98%  | 99% | 100% | 99% | 100% | 100% | 99% | 100% | 100% | 96% | 99%  | 100% | 100% | 86% | 89% | 99%  | 88% |
| <i>LpAlc</i>    |      | 100% | 99% | 99% | 99% | 100% | 99% | 96% | 100% | 99% | 100% | 99% | 99%  | 98% | 99%  | 100% | 99% | 100% | 100% | 99% | 100% | 100% | 100% | 91% | 97% | 99%  | 85% |
| <i>Lpar</i>     |      | 90%  |     | 69% | 76% | 88%  | 68% | 63% | 94%  | 71% | 74%  | 51% | 76%  | 82% | 82%  | 86%  | 74% | 73%  | 69%  | 63% | 81%  | 80%  | 93%  | 56% | 68% | 90%  | 39% |
| <i>LpCorby</i>  | 100% | 100% | 99% | 99% | 99% | 100% | 99% | 96% | 100% | 99% | 100% | 99% |      | 98% | 99%  | 100% | 99% | 100% | 100% | 99% | 99%  | 100% | 100% | 90% | 96% | 99%  | 84% |
| <i>LpFRA</i>    |      | 100% | 95% | 96% | 98% | 99%  | 96% | 95% | 100% | 95% | 96%  | 93% | 96%  | 98% | 100% | 99%  | 96% | 97%  | 98%  | 98% | 98%  | 99%  | 100% | 84% | 89% | 99%  | 89% |
| <i>LpFRA B</i>  |      | 100% | 95% | 97% | 98% | 99%  | 96% | 95% | 100% | 95% | 97%  | 92% | 96%  | 98% | 100% | 99%  | 96% | 97%  | 98%  | 98% | 98%  | 100% | 99%  | 85% | 91% | 99%  | 86% |





**Table S7: Distribution of seventeen highly conserved Dot/Icm secreted substrates**

| GENOMES                             |                | <i>vipF</i>    | <i>ravC</i>    | <i>cetLP1</i>  | -              | -              | -              | -              | <i>ceg25</i>   | <i>legA3/ankH/ankW</i> | -                | -                | <i>mavN</i>      | -                           | -                | -                | -                |
|-------------------------------------|----------------|----------------|----------------|----------------|----------------|----------------|----------------|----------------|----------------|------------------------|------------------|------------------|------------------|-----------------------------|------------------|------------------|------------------|
| Labels                              | <i>lpg0021</i> | <i>lpg0103</i> | <i>lpg0107</i> | <i>lpg0140</i> | <i>lpg0294</i> | <i>lpg0405</i> | <i>lpg1356</i> | <i>lpg1661</i> | <i>lpg1836</i> | <i>lpg2300</i>         | <i>lpg2359</i>   | <i>lpg2628</i>   | <i>lpg2815</i>   | <i>lpg2832</i>              | <i>lpg2888</i>   | <i>lpg2936</i>   | <i>lpg3000</i>   |
| <i>L. adelaidensis</i>              | Lade120        | Lade0258       | Lade0256       | Lade0231       | Lade0007       | NA             | Lade0943       | Lade1699       | Lade0588       | Lade0699               | Lade0795         | NA               | Lade1415         | Lade1427                    | Lade0057         | Lade2155         | Lade0084         |
| <i>L. londinensis</i>               | Llon0485       | Llon1628       | Llon1626       | Llon1596       | Llon1711       | Llon1839       | Llon0620       | NA             | Llon0990       | Llon0331               | Llon1146         | Llon0285         | Llon0105         | Llon0094                    | Llon1760         | Llon0024         | Llon0462         |
| <i>L. yabuuchiae</i>                | Lya2157        | Lya1566        | Lya1568        | Lya1595        | Lya2102        | Lya1793        | Lya1488        | Lya1358        | Lya1171        | Lya0269                | Lya0803          | Lya0877          | Lya0781          | Lya0774                     | Lya1007          | Lya0740          | Lya0995          |
| <i>L. impletisoli</i>               | Lim1774        | Lim1728        | Lim1726        | Lim1700        | Lim2314        | Lim1094        | Lim0190        | Lim0222        | Lim0807        | Lim1516                | Lim1628          | Lim1547          | Lim1369          | Lim1377                     | Lim1804          | Lim1407          | Lim1792          |
| <i>L. oakridgensis RV2-2007</i>     | LoakB0048      | LoakB0105      | LoakB0107      | LoakB0146      | LoakB0296      | LoakB0423      | LoakB1438      | LoakB1357      | LoakB2007      | LoakB0808              | LoakB069<br>7    | LoakB076<br>9    | LoakB247<br>2    | LoakB248<br>1               | LoakB262<br>1    | LoakB251<br>2    | LoakB263<br>0    |
| <i>L. oakridgensis Oak Ridge 10</i> | LoakA0077      | LoakA0139      | LoakA0142      | LoakA0178      | LoakA0370      | LoakA0522      | LoakA1666      | LoakA1570      | LoakA2296      | LoakA0911              | LoakA077<br>7    | LoakA086<br>5    | LoakA283<br>9    | LoakA284<br>8/LoakB28<br>49 | LoakA300<br>9    | LoakA288<br>5    | LoakA302<br>2    |
| <i>L. nagasakiensis</i>             | Lna1528        | Lna2008        | Lna2010        | Lna2045        | Lna2113        | Lna1725        | Lna0687        | Lna0609        | Lna0139        | Lna0111                | Lna0004          | Lna0073          | Lna0994          | Lna1002                     | Lna1484          | Lna1032          | Lna1491          |
| <i>L. like brunensis</i>            | Llikebru0475   | Llikebru2370   | Llikebru2054   | Llikebru0607   | Llikebru1962   | Llikebru1726   | Llikebru2271   | Llikebru1841   | Llikebru0190   | Llikebru0817           | Llikebru23<br>21 | Llikebru22<br>43 | Llikebru06<br>24 | Llikebru06<br>66            | Llikebru20<br>84 | Llikebru04<br>22 | Llikebru04<br>50 |
| <i>L. jordanis</i>                  | Ljor0181       | Ljor0067       | Ljor0061       | Ljor0027       | Ljor2756       | Ljor0479       | Ljor1988       | Ljor1122       | Ljor0640       | Ljor0604               | Ljor2251         | Ljor0708         | Ljor0423         | Ljor0386                    | Ljor0135         | Ljor0296         | Ljor0204         |
| <i>L. lansingensis</i>              | Llan0610       | Llan0256       | Llan0258       | Llan0304       | Llan0357       | Llan0706       | Llan2080       | Llan1513       | Llan2725       | Llan1786               | Llan0166         | Llan0861         | Llan1719         | Llan1753                    | NA               | Llan2522         | Llan0588         |
| <i>L. jamestowniensis</i>           | Lja0661        | Lja0802        | Lja0804        | Lja0852        | Lja0892        | Lja2122        | Lja1659        | Lja1782        | Lja0127        | Lja0168                | Lja0368          | Lja0056          | Lja2055          | Lja2007                     | Lja0763          | Lja0582          | Lja0633          |
| <i>L. hackeliae</i>                 | LHAV2_0022     | LHAV2_0223     | LHAV2_0226     | LHAV2_0268     | LHAV2_0311     | LHAV2_2963     | LHAV2_1825     | LHAV2_1510     | LHAV2_0767     | LHAV2_0726             | LHAV2_05<br>47   | LHAV2_08<br>47   | LHAV2_30<br>34   | LHAV2_30<br>80              | LHAV2_01<br>75   | LHAV2_32<br>09   | LHAV2_32<br>61   |
| <i>L. brunensis</i>                 | Lbru1361       | Lbru0140       | Lbru0136       | Lbru0093       | Lbru0009       | Lbru2928       | Lbru0884       | Lbru1537       | Lbru2605       | Lbru1623               | Lbru2301         | Lbru3291         | Lbru2448         | Lbru2417                    | Lbru0178         | Lbru1233         | Lbru1312         |
| <i>L. fairfieldensis</i>            | Lfair0234      | Lfair1874      | Lfair1871      | Lfair1622      | Lfair0178      | Lfair0944      | Lfair1684      | Lfair1737      | Lfair0747      | Lfair1168              | Lfair1274        | Lfair0769        | Lfair2370        | Lfair0117                   | Lfair1905        | Lfair1980        | Lfair0217        |
| <i>L. massiliensis</i>              | LmasA0422      | LmasA0559      | LmasA0557      | LmasA0616      | NA             | LmasA0175      | LmasA2783      | LmasA3553      | LmasA1825      | LmasA1990              | LmasA102<br>6    | LmasA129<br>5    | LmasA022<br>6    | LmasA025<br>1               | LmasA060<br>6    | LmasA046<br>9    | LmasA044<br>0    |
| <i>L. massiliensis LegA</i>         | LmasB0422      | LmasB0559      | LmasB0557      | LmasB0616      | NA             | LmasB0175      | LmasB2783      | LmasB3553      | LmasB1825      | LmasB1990              | LmasB102<br>6    | LmasB129<br>5    | LmasB022<br>6    | LmasB025<br>1               | LmasB060<br>6    | LmasB046<br>9    | LmasB044<br>0    |
| <i>L. drozanskii</i>                | Ldro1241       | Ldro1410       | Ldro1414       | Ldro1432       | Ldro2913       | Ldro0735       | Ldro0986       | Ldro1054       | Ldro2438       | Ldro0166               | Ldro0006         | Ldro0304         | Ldro0791         | Ldro0815                    | Ldro2722         | Ldro1293         | Ldro1266         |
| <i>L. nautarum</i>                  | Lnau2381       | Lnau2436       | Lnau2440       | Lnau2459       | Lnau2891       | Lnau1100       | Lnau0153       | Lnau0224       | Lnau2977       | Lnau1900               | Lnau1626         | Lnau1391         | Lnau1035         | Lnau2840                    | Lnau2207         | Lnau2326         | Lnau2353         |
| <i>L. maceachernii</i>              | Lma0224        | Lma0452        | Lma0449        | Lma0431        | Lma3074        | Lma2334        | Lma1421        | Lma1496        | Lma1093        | Lma0711                | Lma2083          | Lma1135          | Lma0016          | Lma0043                     | Lma0113          | Lma0288          | Lma0249          |
| <i>L. micdadei RV2-2007</i>         | LmicB2635      | LmicB2443      | LmicB2440      | LmicB2420      | LmicB2327      | LmicB2876      | LmicB1204      | LmicB1124      | LmicB0503      | LmicB2075              | LmicB030<br>2    | LmicB053<br>9    | LmicB282<br>0    | LmicB279<br>2               | LmicB272<br>2    | LmicB258<br>2    | LmicB261<br>4    |
| <i>L. micdadei Tatlock</i>          | LMlv2_0015     | LMlv2_3006     | LMlv2_3003     | LMlv2_2983     | LMlv2_2873     | LMlv2_0264     | LMlv2_1775     | LMlv2_1856     | LMlv2_0950     | LMlv2_2612             | LMlv2_078<br>7   | LMlv2_098<br>5   | LMlv2_02<br>08   | LMlv2_017<br>9              | LMlv2_010<br>9   | LMlv2_313<br>9   | LMlv2_31<br>69   |
| <i>L. feeleii</i>                   | Lfee0339       | Lfee0213       | Lfee0210       | Lfee2067       | Lfee3064       | Lfee2121       | Lfee0591       | Lfee2480       | Lfee1455       | Lfee1629               | Lfee2286         | Lfee0148         | Lfee0924         | Lfee1032                    | NA               | Lfee0279         | Lfee0308         |
| <i>L. beliardensis</i>              | Lbe2206        | Lbe1538        | Lbe1540        | Lbe1572        | Lbe1630        | Lbe2120        | Lbe1827        | Lbe0372        | Lbe1061        | Lbe1031                | Lbe2592          | Lbe1219          | Lbe1502          | Lbe1491                     | Lbe1368          | Lbe1408          | Lbe1388          |
| <i>L. gresilensis</i>               | Lgre1283       | Lgre1346       | Lgre1347       | Lgre1382       | Lgre1456       | Lgre1902       | Lgre0927       | Lgre2800       | Lgre1553       | Lgre1583               | Lgre0307         | Lgre0473         | Lgre1834         | Lgre1818                    | Lgre1156         | Lgre1206         | Lgre1178         |

|                                    |                  |                  |                  |                   |                  |                  |                  |                  |                  |                  |                  |                  |                  |                  |                  |                  |                  |
|------------------------------------|------------------|------------------|------------------|-------------------|------------------|------------------|------------------|------------------|------------------|------------------|------------------|------------------|------------------|------------------|------------------|------------------|------------------|
| <i>L. busanensis</i>               | Lbu1704          | Lbu1761          | Lbu1762          | Lbu1792           | Lbu3334          | Lbu1396          | Lbu0368          | Lbu0629          | Lbu2259          | Lbu2290          | Lbu2066          | Lbu0841          | Lbu1460          | Lbu1476          | Lbu1570          | Lbu1631          | Lbu1590          |
| <i>L. genomospecies</i>            | Lge1388          | Lge1930          | Lge1951          | Lge1849           | Lge3018          | Lge1896          | Lge2228          | Lge1507          | Lge3002          | Lge3149          | Lge1714          | Lge2108          | Lge1972          | Lge1879          | Lge2801          | Lge3067          | Lge1338          |
| <i>L. quinivanii</i>               | Lquin1995        | Lquin1111        | Lquin1089        | Lquin0684         | Lquin2766        | Lquin1145        | Lquin0436        | Lquin1681        | Lquin0267        | Lquin1879        | Lquin2663        | Lquin0151        | Lquin0660        | Lquin1162        | Lquin1241        | Lquin1273        | Lquin1307        |
| <i>L. birminghamensis</i>          | Lbir1452         | Lbir1011         | Lbir1004         | Lbir2042          | Lbir2803         | Lbir1053         | Lbir1954         | Lbir1523         | Lbir0007         | Lbir1888         | Lbir1223         | Lbir0118         | Lbir2012         | Lbir1074         | Lbir0855         | Lbir0885         | Lbir1790         |
| <i>L. spiritalensis</i>            | Lspi1416         | Lspi1306         | Lspi1298         | Lspi1267          | Lspi2978         | Lspi0711         | Lspi0243         | Lspi2435         | Lspi1993         | Lspi2321         | Lspi2467         | Lspi2273         | Lspi0656         | Lspi0639         | NA               | Lspi0539         | Lspi2948         |
| <i>L. erythra</i>                  | Lery0969         | Lery1353         | Lery1362         | Lery1399/Lery1400 | Lery2130         | Lery1795         | Lery0403         | Lery1481         | Lery0732         | Lery2768         | Lery2375         | Lery0139         | Lery2565         | Lery2238         | Lery1326         | Lery0899         | Lery0944         |
| <i>L. rubrilucens</i>              | Lrub1678         | Lrub1794         | Lrub1805         | Lrub1841          | Lrub1506         | Lrub2020         | Lrub1286         | Lrub2502         | Lrub0296         | Lrub0262         | Lrub0108         | Lrub0810         | Lrub2073         | Lrub2093         | Lrub1767         | Lrub1609         | Lrub1654         |
| <i>L. taurinensis</i>              | Ltau1071         | Ltau1191         | Ltau1200         | Ltau1238          | Ltau2199         | Ltau0895         | Ltau0666         | Ltau2007         | Ltau0193         | Ltau0157         | Ltau0004         | Ltau1339         | Ltau0842         | Ltau0823         | Ltau1163         | Ltau2100         | Ltau1046         |
| <i>L. israelensis12</i>            | Lis1727          | Lis1517          | Lis1574          | Lis2574           | Lis1572          | Lis0156          | Lis1215          | NA               | Lis1132          | Lis1848          | Lis0793          | Lis2018          | Lis1904          | Lis1040          | Lis0489          | Lis0192          | Lis1176          |
| <i>L. rowbothamii</i>              | Lrow1191         | Lrow1575         | Lrow1576         | Lrow1375          | Lrow1425         | Lrow2075         | Lrow0558         | Lrow0429         | Lrow2607         | Lrow3222         | Lrow3267         | Lrow0249         | Lrow1644         | Lrow1361         | Lrow1346         | Lrow1250         | Lrow1165         |
| <i>L. drancourtii</i>              | Ldra0447         | Ldra1030         | Ldra1029         | Ldra0996          | Ldra2090         | Ldra3282         | Ldra0674         | Ldra3800         | Ldra1271         | Ldra1597         | Ldra1545         | NA               | Ldra3574         | Ldra3517         | Ldra3500         | Ldra0409         | Ldra0474         |
| <i>L. gratiana</i>                 | Lgra2618         | Lgra2065         | Lgra2064         | Lgra2005          | Lgra3308         | Lgra0743         | Lgra1580         | Lgra1155         | Lgra0378         | Lgra3021         | Lgra0730         | Lgra3107         | Lgra1854         | Lgra1818         | Lgra1804         | Lgra1707         | Lgra2568         |
| <i>L. sainthelensi</i>             | Lsain3412        | Lsain1427        | Lsain1426        | Lsain1373         | Lsain3547        | Lsain0177        | Lsain0837        | Lsain0915        | Lsain2479        | Lsain1722        | Lsain0190        | Lsain1981        | Lsain0405        | Lsain0364        | Lsain0349        | Lsain0280        | Lsain1245        |
| <i>L. longbeachae Long Beach 4</i> | LloAT0022        | LloAT3552        | LloAT3551        | LloAT3499         | LloAT0456        | LloAT3041        | LloAT1509        | LloAT1776        | LloAT1109        | LloAT0582        | LloAT3052        | LloAT0806        | LloAT0237        | LloAT0196        | LloAT0182        | LloAT0060        | LloAT3706        |
| <i>L. longbeachae D4968</i>        | ACZGv1_118<br>37 | ACZGv1_120<br>26 | ACZGv1_120<br>27 | ACZGv1_120<br>82  | ACZGv1_113<br>90 | ACZGv1_201<br>10 | ACZGv1_102<br>13 | ACZGv1_213<br>44 | ACZGv1_106<br>38 | ACZGv1_112<br>66 | ACZGv1_2<br>0099 | ACZGv1_1<br>0947 | ACZGv1_1<br>1617 | ACZGv1_1<br>1659 | ACZGv1_1<br>1673 | ACZGv1_1<br>1799 | ACZGv1_1<br>1890 |
| <i>L. longbeachae NSW150</i>       | llo0047          | llo3312          | llo3311          | llo3260           | llo0464          | llo2845          | llo1443          | llo1691          | llo1068          | llo0584          | llo2856          | llo0787          | llo0254          | llo0214          | llo0200          | llo0081          | llo3444          |
| <i>L. longbeachae 98072</i>        | Llo980024        | Llo983484        | Llo983483        | Llo983431         | Llo980450        | Llo983036        | Llo981490        | Llo981781        | Llo981102        | Llo980578        | Llo983047        | Llo980817        | Llo980231        | Llo980196        | Llo980182        | Llo980060        | Llo983625        |
| <i>L. cincinnatiensis</i>          | Lci0853          | Lci1085          | Lci1086          | Lci3327           | Lci2430          | Lci3439          | Lci0187          | Lci1655          | Lci0937          | Lci2675          | Lci2941          | Lci2917          | Lci1894          | Lci1854          | Lci2500          | Lci1602          | Lci0809          |
| <i>L. santitricus</i>              | Lsan1166         | Lsan3109         | Lsan3110         | Lsan3635          | Lsan0788         | Lsan0066         | Lsan1098         | Lsan3897         | Lsan1677         | Lsan0396         | Lsan0055         | Lsan2098         | Lsan2295         | Lsan3594         | Lsan2760         | Lsan1130         | Lsan1209         |
| <i>L. dumoffii TexKL</i>           | LduTex0023       | LduTex3196       | LduTex3195       | LduTex3145        | LduTex2822       | LduTex2707       | LduTex1825       | LduTex1660       | LduTex1207       | LduTex0590       | LduTex05<br>43   | LduTex09<br>14   | LduTex02<br>02   | LduTex01<br>53   | LduTex01<br>39   | LduTex00<br>60   | LduTex32<br>91   |
| <i>L. dumoffii NY23</i>            | LduN230023       | LduN233239       | LduN233238       | LduN233186        | LduN232883       | LduN232622       | LduN230726       | LduN230889       | LduN231343       | LduN231869       | LduN2319<br>16   | LduN2316<br>48   | LduN2302<br>00   | LduN2301<br>52   | LduN2301<br>38   | LduN2300<br>58   | LduN2333<br>43   |
| <i>L. cherrii</i>                  | Lche2919         | Lche2764         | Lche2763         | Lche2711          | Lche2431         | Lche2327         | Lche0364         | Lche0199         | Lche1531         | Lche2190         | Lche2237         | Lche1226         | Lche2994         | Lche2657         | Lche2671         | Lche0953         | Lche2871         |
| <i>L. steigerwaltii</i>            | Lstei3111        | Lstei0811        | Lstei0810        | Lstei3527         | Lstei3451        | Lstei2322        | Lstei0047        | Lstei0205        | Lstei0383        | Lstei3407        | Lstei1651        | Lstei1716        | Lstei2513        | Lstei1812        | Lstei1827        | Lstei3199        | Lstei0929        |
| <i>L. wadsworthii</i>              | Lwad3260         | Lwad2090         | Lwad2089         | Lwad2041          | Lwad2587         | Lwad1652         | Lwad1362         | Lwad1206         | Lwad2311         | Lwad0681         | Lwad0724         | Lwad2802         | Lwad1885         | Lwad1850         | Lwad1836         | Lwad1753         | Lwad3065         |
| <i>L. tucsonensis</i>              | Ltuc3058         | Ltuc2930         | Ltuc2929         | Ltuc2875          | Ltuc1976         | Ltuc1654         | Ltuc0601         | Ltuc0763         | Ltuc1205         | Ltuc2804         | Ltuc2851         | Ltuc0179         | Ltuc2040         | Ltuc2093         | Ltuc2107         | Ltuc2188         | Ltuc3029         |
| <i>L. anisa awa-316-C3</i>         | LanB0709         | LanB0318         | LanB0317         | LanB2865          | LanB2798         | LanB0095         | LanB2384         | LanB1300         | LanB3906         | LanB2807         | LanB0183         | LanB3591         | LanB1049         | LanB1142         | LanB1128         | LanB0673         | LanB0740         |
| <i>L. anisa Linanissette</i>       | LanA0412         | LanA2323         | LanA2321         | LanA2267          | LanA3812         | LanA2670         | LanA0146         | LanA2054         | LanA3974         | LanA3640         | LanA3594         | NA               | LanA0582         | LanA0547         | LanA0532         | LanA0448         | LanA0381         |
| <i>L. parisiensis</i>              | Lpar1121         | Lpar0969         | Lpar0968         | Lpar0915          | Lpar2586         | Lpar2116         | Lpar1370         | Lpar1532         | Lpar0288         | Lpar2920         | Lpar2877         | Lpar0725         | Lpar1287         | Lpar1252         | Lpar1238         | Lpar1155         | Lpar1091         |

|                                             |             |             |             |                 |             |             |             |             |             |             |             |             |             |                       |             |             |                 |
|---------------------------------------------|-------------|-------------|-------------|-----------------|-------------|-------------|-------------|-------------|-------------|-------------|-------------|-------------|-------------|-----------------------|-------------|-------------|-----------------|
| <i>L. bozemanii</i> WIGA                    | LboA2675    | LboA2455    | LboA2454    | LboA2402        | LboA3341    | LboA0949    | LboA1360    | LboA1521    | LboA0059    | LboA2684    | LboA2730    | LboA0396    | LboA1788    | LboA1823              | LboA1837    | LboA2640    | LboA2069        |
| <i>L. bozemanii</i> 94163278                | LboB0592    | LboB0790    | LboB0791    | LboB0842        | LboB1199    | LboB1322    | LboB2283    | LboB2446    | LboB2936    | LboB0028    | LboB0075    | LboB3257    | LboB0421    | LboB0455              | LboB0470    | LboB0557    | LboB0648        |
| <i>L. gormanii</i>                          | LgoB3348    | LgoB3192    | LgoB3191    | LgoB3112        | LgoB2835    | LgoB2712    | LgoB1770    | LgoB1559    | LgoB1131    | LgoB0432    | LgoB0384    | LgoB0796    | LgoB3533    | LgoB3489              | LgoB3473    | LgoB3389    | LgoB3320        |
| <i>L. gormanii</i> LS-13                    | LgoA0761    | LgoA0908    | LgoA0907    | LgoA0832        | LgoA1535    | LgoA0104    | LgoA0383    | LgoA3073    | LgoA0961    | LgoA2883    | LgoA1332    | LgoA1288    | LgoA1463    | LgoA1505              | LgoA2871    | LgoA2637    | LgoA0733        |
| <i>L. fallonii</i>                          | LFAv2_0027  | LFAv2_0162  | LFAv2_0165  | LFAv2_0200      | LFAv2_0305  | LFAv2_2711  | LFAv2_1281  | LFAv2_1679  | LFAv2_1990  | LFAv2_2306  | LFAv2_3259  | LFAv2_2574  | LFAv2_3530  | LFAv2_3562            | LFAv2_3619  | LFAv2_3709  | LFAv2_3784      |
| <i>L. shakespearei</i>                      | LshaDSM2968 | LshaDSM0935 | LshaDSM0939 | LshaDSM0969     | LshaDSM1059 | LshaDSM2450 | LshaDSM0485 | LshaDSM1105 | LshaDSM0193 | LshaDSM2697 | LshaDSM2023 | LshaDSM1379 | LshaDSM1531 | LshaDSM1511           | LshaDSM1275 | LshaDSM1336 | LshaDSM2279     |
| <i>L. worsleiensis</i>                      | Lwor0817    | Lwor0958    | Lwor0963    | Lwor0991        | Lwor1033    | Lwor2133    | Lwor0227    | Lwor0536    | Lwor2355    | Lwor1100    | Lwor1044    | Lwor0755    | Lwor0455    | Lwor0434              | Lwor0372    | Lwor0895    | Lwor0838        |
| <i>L. quateirensis</i>                      | Lqua0582    | Lqua1864    | Lqua1852    | Lqua1816        | Lqua1749    | Lqua1640    | Lqua1361    | Lqua3377    | Lqua0891    | Lqua0318    | Lqua0378    | Lqua1994    | Lqua0806    | Lqua0790              | Lqua0733    | Lqua0683    | Lqua0610        |
| <i>L. moravica</i>                          | Lmo3232     | Lmo0625     | Lmo0619     | Lmo0587         | Lmo0497     | Lmo2773     | Lmo0077     | Lmo2009     | Lmo0442     | Lmo1775     | Lmo3095     | Lmo0954     | Lmo1402     | Lmo1416               | Lmo1542     | Lmo1486     | Lmo3295         |
| <i>L. waltersii</i>                         | Lwal0138    | Lwal0250    | Lwal0252    | Lwal0286        | Lwal2886    | Lwal0453    | Lwal1212    | Lwal0999    | Lwal2291    | Lwal3400    | Lwal1566    | Lwal1460    | Lwal2719    | Lwal1982              | Lwal0012    | Lwal0053    | Lwal0108        |
| <i>L. norrlandica</i>                       | Lno0955     | Lno2009     | Lno2012     | Lno0467/Lno0468 | Lno1814     | Lno1902     | Lno1315     | Lno1128     | Lno1195     | Lno1390     | Lno1790     | Lno0273     | Lno0196     | Lno0181               | NA          | Lno0548     | Lno0929/Lno0930 |
| <i>L. pneumophila</i> Alcoy                 | LpAlc0021   | LpAlc0118   | LpAlc0122   | LpAlc0159       | LpAlc0365   | LpAlc0472   | LpAlc1467   | LpAlc1782   | LpAlc1971   | LpAlc2435   | LpAlc2499   | LpAlc2823   | LpAlc3018   | LpAlc3036             | LpAlc3097   | LpAlc3166   | LpAlc3248       |
| <i>L. pneumophila</i> Corby                 | LPC_0022    | LPC_0122    | LPC_0126    | LPC_0161        | LPC_0373    | LPC_2939    | LPC_0770    | LPC_1091    | LPC_1280    | LPC_1765    | LPC_1828    | LPC_0513    | LPC_3101    | LPC_3116              | LPC_3174    | LPC_3243    | LPC_3316        |
| <i>L. pneumophila</i> Thunder Bay           | LpThu0022   | LpThu0110   | LpThu0114   | LpThu0150       | LpThu0309   | LpThu0408   | LpThu1406   | LpThu1715   | LpThu1896   | LpThu2445   | LpThu2508   | LpThu2815   | LpThu3003   | LpThu3023             | LpThu3082   | LpThu3143   | LpThu3213       |
| <i>L. pneumophila</i> 570-CO-H              | Lp570C0022  | Lp570C0108  | Lp570C0112  | Lp570C0148      | Lp570C0309  | Lp570C0414  | Lp570C1323  | Lp570C1632  | Lp570C1815  | Lp570C2347  | Lp570C2410  | Lp570C2718  | Lp570C2906  | Lp570C2926            | Lp570C2986  | Lp570C3043  | Lp570C3112      |
| <i>L. pneumophila</i> LPE509                | LpLPE3172   | LpLPE3085   | LpLPE3081   | LpLPE3046       | LpLPE2885   | LpLPE2778   | LpLPE1822   | LpLPE1510   | LpLPE1326   | LpLPE0773   | LpLPE0710   | LpLPE0400   | LpLPE0210   | LpLPE0190             | LpLPE0130   | LpLPE0073   | LpLPE0005       |
| <i>L. pneumophila</i> Philadelphia          | lpg0021     | lpg0103     | lpg0107     | lpg0140         | lpg0294     | lpg0405     | lpg1356     | lpg1661     | lpg1836     | lpg2300     | lpg2359     | lpg2628     | lpg2815     | lpg2832               | lpg2888     | lpg2936     | lpg3000         |
| <i>L. pneumophila</i> 130b                  | Lp130b0022  | Lp130b0105  | Lp130b0109  | Lp130b0144      | Lp130b0411  | Lp130b0518  | Lp130b1437  | Lp130b1771  | Lp130b1949  | Lp130b2559  | Lp130b2626  | Lp130b2958  | Lp130b3157  | Lp130b3177/Lp130b3178 | Lp130b3243  | Lp130b3311  | Lp130b3373      |
| <i>L. pneumophila</i> Lens                  | lpl0022     | lpl0103     | lpl0107     | lpl0140         | lpl0347     | lpl0447     | lpl1307     | lpl1626     | lpl1800     | lpl2219     | lpl2281     | lpl2553     | lpl2730     | lpl2744               | lpl2801     | lpl2865     | lpl2928         |
| <i>L. pneumophila</i> Lorraine              | LPOv2_0022  | LPOv2_0111  | LPOv2_0115  | LPOv2_0153      | LPOv2_0351  | LPOv2_0465  | LPOv2_1345  | LPOv2_1696  | LPOv2_1897  | LPOv2_2371  | LPOv2_2439  | LPOv2_2904  | LPOv2_3107  | LPOv2_3127            | LPOv2_3193  | LPOv2_3261  | LPOv2_3342      |
| <i>L. pneumophila</i> Paris                 | lpp0021     | lpp0117     | lpp0121     | lpp0155         | lpp0372     | lpp0471     | lpp1310     | lpp1632     | lpp1799     | lpp2248     | lpp2308     | lpp2681     | lpp2867     | lpp2889               | lpp2947     | lpp3004     | lpp3072         |
| <i>L. pneumophila</i> HL06041035            | LPVv2_0025  | LPVv2_0119  | LPVv2_0123  | LPVv2_0158      | LPVv2_0389  | LPVv2_0504  | LPVv2_1469  | LPVv2_1917  | LPVv2_2108  | LPVv2_2567  | LPVv2_2633  | LPVv2_2967  | LPVv2_3187  | LPVv2_3187            | LPVv2_3246  | LPVv2_3311  | LPVv2_3388      |
| <i>L. pneumophila</i> fraseri Dallas 1E     | LpFRAB2690  | LpFRAB2401  | LpFRAB2405  | LpFRAB2439      | LpFRAB3039  | LpFRAB1803  | LpFRAB0138  | LpFRAB0463  | LpFRAB1319  | LpFRAB0656  | LpFRAB0718  | LpFRAB2011  | LpFRAB1578  | LpFRAB1558            | LpFRAB1500  | LpFRAB1438  | LpFRAB2662      |
| <i>L. pneumophila</i> fraseri Los Angeles 1 | LpFRA1679   | LpFRA2130   | LpFRA2134   | LpFRA2168       | LpFRA2876   | LpFRA2306   | LpFRA0193   | LpFRA0518   | LpFRA1216   | LpFRA1546   | LpFRA1609   | LpFRA2493   | LpFRA1041   | LpFRA1022             | LpFRA0965   | LpFRA0902   | LpFRA1707       |
| <i>L. pneumophila</i> fraseri Lansing3      | LpFRAC2182  | LpFRAC1931  | LpFRAC1935  | LpFRAC1970      | LpFRAC2858  | LpFRAC0815  | LpFRAC2572  | LpFRAC1527  | LpFRAC1358  | LpFRAC0072  | LpFRAC0009  | LpFRAC1100  | LpFRAC1272  | LpFRAC1253            | LpFRAC1194  | LpFRAC2753  | LpFRAC2210      |
| <i>L. pneumophila</i> pascullei             | LpPAS1745   | LpPAS1656   | LpPAS1652   | LpPAS1618       | LpPAS1436   | LpPAS2677   | LpPAS0242   | LpPAS0576   | LpPAS0750   | LpPAS2315   | LpPAS2378   | LpPAS1207   | LpPAS1399   | LpPAS1416             | LpPAS3023   | LpPAS3076   | LpPAS1770       |
| <i>L. geestiana</i>                         | NA          | Lges0377    | Lges0321    | Lges0292        | NA          | NA          | Lges0005    | Lges0876    | NA          | Lges1288    | Lges1876    | NA          | Lges1017    | Lges2240              | Lges0346    | Lges1633    | Lges0445        |

| <i>L. osnabrueckensis</i> | Loas2676 | Loas2209 | Loas2930 | Loas1612 | Loas2055 | Loas2096 | Loas0320 | Loas0449 | NA | Loas0978 | Loas1180 | Loas1127 | Loas2090 | Loas2160 | NA | Loas1447 | Loas2699 |
|---------------------------|----------|----------|----------|----------|----------|----------|----------|----------|----|----------|----------|----------|----------|----------|----|----------|----------|
|---------------------------|----------|----------|----------|----------|----------|----------|----------|----------|----|----------|----------|----------|----------|----------|----|----------|----------|

From more than 300 Dot/Icm *L. pneumophila* substrates, 17 are present in all or almost all analyzed species. In white: orthologous genes, in light blue: cases in which corresponding orthologous are two consecutive genes, and in yellow absence of significant orthologous gene.

**Table S8:** Comparison of the effector repertoire among strains of the same *Legionella* species

| <b>Species</b>                  | <b>Number of strains</b> | <b>Common effectors</b> |
|---------------------------------|--------------------------|-------------------------|
| <i>L. anisa</i>                 | 2                        | 200/217 (92%)           |
| <i>L. bozemanii</i>             | 2                        | 186/218(85%)            |
| <i>L. dumoffii</i>              | 2                        | 179/184(97%)            |
| <i>L. gormanii</i>              | 2                        | 192/218(88%)            |
| <i>L. longbeachae</i>           | 2                        | 229/248(92%)            |
| <i>L. micdadei</i>              | 2                        | 135/148(91%)            |
| <i>L. oakridgensis</i>          | 2                        | 97/118(82%)             |
| <i>L. pneumophila</i>           | 2                        | 303/354(88%)            |
| <i>L. pneum. subs. fraserii</i> | 2                        | 310/324(96%)            |
| <i>L. pneumophila</i>           | 11                       | 264/408 (65%)           |

**Table S9.** Number of Dot/Icm secreted proteins predicted in each strain analyzed

| <b>Species</b>                 | <b>Strain</b>           | <b>E1</b> | <b>E2</b> | <b>ELP</b> | <b>Etot</b> |
|--------------------------------|-------------------------|-----------|-----------|------------|-------------|
| <i>L. adelaidensis</i>         | 1762-AUS-E              | 38        | 57        | 12         | 93          |
| <i>L. londiniensis</i>         | 1477                    | 33        | 38        | 8          | 70          |
| <i>L. yabuuchiae</i>           | OA1-2                   | 33        | 59        | 12         | 95          |
| <i>L. impletisoli</i>          | OA1-1                   | 36        | 56        | 12         | 93          |
| <i>L. oakridgensis</i>         | RV2-2007                | 43        | 59        | 18         | 109         |
| <i>L. oakridgensis</i>         | Oak Ridge 10            | 38        | 56        | 22         | 106         |
| <i>L. nagasakiensis</i>        | JCM 15315               | 49        | 57        | 18         | 111         |
| <i>L. LIKE brunensis</i>       | W10-070                 | 49        | 69        | 15         | 119         |
| <i>L. jordanis</i>             | Gorman BL-540           | 62        | 69        | 15         | 129         |
| <i>L. lansingensis</i>         | 1677-MI-H               | 67        | 70        | 20         | 138         |
| <i>L. jamestowniensis</i>      | JA-26-G1-E2             | 69        | 97        | 28         | 164         |
| <i>L. hackeliae</i>            | Lansing 2               | 73        | 88        | 22         | 162         |
| <i>L. brunensis</i>            | 441-1                   | 75        | 96        | 32         | 183         |
| <i>L. fairfieldensis</i>       | 1725-Aus-E              | 26        | 54        | 22         | 90          |
| <i>L. massiliensis</i>         |                         | 71        | 127       | 36         | 203         |
| <i>L. massilensis</i>          | LegA                    | 71        | 127       | 36         | 203         |
| <i>L. drozanskii</i>           | LLAP1                   | 47        | 103       | 30         | 162         |
| <i>L. nautarum</i>             | 1224                    | 46        | 107       | 24         | 162         |
| <i>L. maceachernii</i>         | Gorman PX-1-<br>G2-E2   | 44        | 101       | 28         | 153         |
| <i>L. micdadei</i>             | févr-42                 | 49        | 87        | 21         | 142         |
| <i>L. micdadei</i>             | Tatlock                 | 48        | 88        | 18         | 141         |
| <i>L. feeleeii</i>             | WO-44C                  | 56        | 94        | 24         | 147         |
| <i>L. beliardensis</i>         | Wilkinson 1407-<br>AL-H | 60        | 87        | 42         | 163         |
| <i>L. gresilensis</i>          | Greoux 11D13            | 63        | 118       | 53         | 191         |
| <i>L. busanensis</i>           | BAA518                  | 59        | 100       | 39         | 168         |
| <i>L. genomospecies</i>        | 2055-AUS-E              | 51        | 74        | 33         | 141         |
| <i>L. quinlivanii</i>          | 1442-AUS-E              | 51        | 79        | 38         | 149         |
| <i>L. birminghamensis</i>      | 1407-AL-H               | 53        | 83        | 31         | 151         |
| <i>L. spiritensis</i>          | Bibb HSH-9              | 70        | 79        | 28         | 161         |
| <i>L. erythra</i>              | SE-32A-C8               | 66        | 87        | 27         | 150         |
| <i>L. rubrilucens</i>          | WA-270A-C2              | 71        | 80        | 28         | 155         |
| <i>L. taurinensis</i>          | Turin I                 | 69        | 79        | 25         | 148         |
| <i>L. israelensis</i>          | Bercovier 4             | 51        | 76        | 22         | 137         |
| <i>L. rowbothamii</i>          | LLAP6                   | 80        | 115       | 31         | 193         |
| <i>L. drancourtii (LLAP12)</i> | LLAP12                  | 74        | 99        | 29         | 173         |
| <i>L. gratiana</i>             | Lyon 8420412            | 112       | 98        | 37         | 212         |
| <i>L. sainthelensi</i>         | MSH-4                   | 133       | 108       | 39         | 244         |
| <i>L. longbeachae</i>          | Long Beach 4            | 126       | 106       | 42         | 237         |
| <i>L. longbeachae</i>          | NSW150                  | 126       | 109       | 45         | 240         |
| <i>L. longbeachae</i>          | 98072                   | 127       | 108       | 41         | 486         |
| <i>L. longbeachae</i>          | D-4968                  | 128       | 108       | 44         | -6          |

|                                        |                |      |      |      |       |
|----------------------------------------|----------------|------|------|------|-------|
| <i>L. cincinnatiensis</i>              | 72-OH-0        | 123  | 108  | 37   | 233   |
| <i>L. santicrucis</i>                  | SC-63-C7       | 121  | 133  | 46   | 262   |
| <i>L. dumoffii</i>                     | TexKL          | 90   | 90   | 24   | 182   |
| <i>L. dumoffii</i>                     | NY23           | 90   | 89   | 24   | 181   |
| <i>L. cherrii</i>                      | ORW            | 92   | 104  | 30   | 199   |
| <i>L. steigerwaltii</i>                | SC-18-C9       | 96   | 104  | 34   | 202   |
| <i>L. wadsworthii</i>                  | 81-716         | 95   | 86   | 28   | 188   |
| <i>L. tucsonensis</i>                  | 1087-AZ-H      | 91   | 77   | 25   | 171   |
| <i>L. anisa</i>                        | WA-316-C3      | 99   | 112  | 26   | 210   |
| <i>L. anisa</i>                        | Linanissette   | 97   | 110  | 26   | 207   |
| <i>L. parisiensis</i>                  | PF-209C-C2     | 103  | 113  | 25   | 211   |
| <i>L. bozemanii (bozemanae)</i>        | WIGA           | 110  | 97   | 30   | 204   |
| <i>L. bozemanii (bozemanae)</i>        | 94163278       | 109  | 92   | 31   | 200   |
| <i>L. gormanii</i>                     | mars-69        | 101  | 104  | 27   | 208   |
| <i>L. gormanii</i>                     | LS-13          | 101  | 103  | 23   | 202   |
| <i>L. fallonii</i>                     | LLAP10         | 100  | 117  | 32   | 213   |
| <i>L. shakespearei</i>                 | CDC 214        | 100  | 95   | 27   | 198   |
| <i>L. worsleiensis</i>                 | 95/83-1347     | 83   | 91   | 25   | 168   |
| <i>L. quateirensis</i>                 | Thacker 1335   | 136  | 119  | 35   | 256   |
| <i>L. moravica</i>                     | 316-86         | 118  | 105  | 21   | 212   |
| <i>L. waltersii</i>                    | 2074-AUS-E     | 121  | 99   | 28   | 221   |
| <i>L. norrlandica</i>                  | LEGN           | 98   | 63   | 17   | 160   |
| <i>L. pneumophila</i>                  | Alcoy          | 261  | 78   | 26   | 321   |
| <i>L. pneumophila</i>                  | Corby          | 261  | 80   | 25   | 322   |
| <i>L. pneumophila</i>                  | Thunder Bay    | 296  | 77   | 25   | 345   |
| <i>L. pneumophila</i>                  | 570-CO-H       | 298  | 78   | 25   | 347   |
| <i>L. pneumophila</i>                  | LPE509         | 299  | 77   | 24   | 347   |
| <i>L. pneumophila</i>                  | Philadelphia   | 300  | 79   | 28   | 353   |
| <i>L. pneumophila</i>                  | 130b           | 265  | 85   | 27   | 330   |
| <i>L. pneumophila</i>                  | Lens           | 246  | 79   | 30   | 308   |
| <i>L. pneumophila</i>                  | Lorraine       | 269  | 81   | 30   | 331   |
| <i>L. pneumophila</i>                  | Paris          | 268  | 89   | 25   | 335   |
| <i>L. pneumophila</i>                  | HL06041035     | 275  | 83   | 27   | 335   |
| <i>L. pneumophila subsp. fraseri</i>   | Dallas 1E      | 255  | 79   | 23   | 315   |
| <i>L. pneumophila subsp. fraseri</i>   | Los Angeles 1  | 252  | 83   | 26   | 319   |
| <i>L. pneumophila subsp. fraseri</i>   | Lansing3       | 245  | 77   | 25   | 306   |
| <i>L. pneumophila subsp. pascullei</i> | Brown U8W      | 267  | 84   | 25   | 328   |
| <i>L. geestiana</i>                    | 1308           | 35   | 61   | 12   | 89    |
| <i>L. osnabrueckensis</i>              | W0511934-2     | 51   | 70   | 25   | 127   |
|                                        | Total proteins | 9110 | 7103 | 2196 | 16114 |

E1= effectors predicted by searching orthologs of effectors from *L. pneumophila* previously validated experimentally. E2=effectors predicted in the present study by searching proteins with eukaryotic motifs and their corresponding orthologous proteins. ELP= eukaryotic like proteins. E<sub>tot</sub>= E1 + E2 + ELP removing duplicates.



**Table S10. Replication capacity of the different *Legionella* species analyzed in this study and collection of literature data on *Legionella* replication**

| Species                          | Strain                 | ATCC   | Isol | Clin.Fr. | THP1 (This study) |     |     | THP1 Summary | U937 cells             | Mono Mac 6   | Mouse macrophages | Guinea pig macrophages | A549 | Guinea pigs                 |
|----------------------------------|------------------------|--------|------|----------|-------------------|-----|-----|--------------|------------------------|--------------|-------------------|------------------------|------|-----------------------------|
|                                  |                        |        |      |          | 24h               | 48h | 72h |              |                        |              |                   |                        |      |                             |
| <i>L. adelaidensis</i>           | 1762-AUS-E             | 49625  | Env  |          | -                 | -   | -   |              | N (17)                 |              |                   |                        |      |                             |
| <i>L. anisa</i>                  | WA-316-C3              | 35292  | Clin | 0,2      | N                 | N   | N   | N            |                        | N (18)       | N(19)             | Y(19)                  |      | does not infect (20)        |
| <i>L. anisa</i>                  | Linanissette           |        | Clin |          | -                 | -   | -   |              |                        |              |                   |                        |      |                             |
| <i>L. beliardensis</i>           | Wilkinson<br>1407-AL-H | 700512 | Env  |          | N                 | N   | N   | N            |                        |              |                   |                        |      |                             |
| <i>L. birminghamensis</i>        | 1407-AL-H              | 43702  | Clin |          | Y                 | Y   | Y   | Y            | Y(17); Y after 72h(21) | Y but at 72h | Y (19)            | Y(19)                  |      |                             |
| <i>L. bozemanii (bozemaniae)</i> | WIGA                   | 33217  | Clin | 2,4      | Y                 | Y   | Y   | Y            | Y (17)                 | N (18)       | Y (19)            | Y (19)                 |      | Infects, does not kill (20) |
| <i>L. bozemanii (bozemaniae)</i> | 94163278               |        | ?    |          | -                 | -   | -   |              |                        |              |                   |                        |      |                             |
| <i>L. brunensis</i>              | 441-1                  | 43878  | Env  |          | Y                 | N   | N   | Y at 24h     | N (17)                 |              |                   |                        |      |                             |
| <i>L. busanensis</i>             | BAA518                 |        | Env  |          | N                 | N   | N   | N            |                        |              |                   |                        |      |                             |
| <i>L. cherrii</i>                | ORW                    | 35252  | Env  |          | N                 | N   | N   | N            | N (17, 21)             |              |                   |                        |      |                             |
| <i>L. cincinnatiensis</i>        | 72-OH-0                | 43753  | Clin |          | N                 | N   | N   | N            | N (17, 21)             |              | N (19)            | N (19)                 |      |                             |
| <i>L. drancourtii</i>            | LLAP12                 | 50991  | Env  |          | -                 | -   | -   |              |                        |              |                   |                        |      |                             |
| <i>L. drozanskii</i>             | LLAP1                  | 700990 | Env  |          | -                 | -   | -   |              |                        |              |                   |                        |      | Infects, does not           |

|                           |                       |        |      |     |   |   |   |           |                     |            |        |        |                       |
|---------------------------|-----------------------|--------|------|-----|---|---|---|-----------|---------------------|------------|--------|--------|-----------------------|
| <i>L. fairfieldensis</i>  | 1725-Aus-E            |        | Env  | -   | - | - |   |           |                     |            |        |        |                       |
| <i>L. fallonii</i>        | LLAP10                | 700992 | Env  | N   | N | N |   | N (23)    |                     |            |        |        |                       |
| <i>L. feeleii</i>         | WO-44C                | 35072  | Clin | 0,4 | N | N | N | N         | Y (17)              |            | Y (19) | Y (19) | does not infect (20)  |
| <i>L. geestiana</i>       | 1308                  | 49504  | Env  | -   | - | - |   |           |                     |            |        |        |                       |
| <i>L. genomospecies</i>   | 2055-AUS-E            | 51913  | Env  |     | Y | N | N | Y at 24 h |                     |            |        |        |                       |
| <i>L. gormanii</i>        | LS-13                 | 33297  | Clin |     | Y | N | Y | Y         | N (17)              |            |        |        |                       |
| <i>L. gormanii</i>        | 03-69                 |        | ?    |     | - | - | - |           |                     |            |        |        |                       |
| <i>L. gratiana</i>        | Lyon<br>8420412       | 49413  | Env  |     | N | N | N | N         | N (17, 21)          |            |        |        |                       |
| <i>L. gresilensis</i>     | Greoux<br>11D13       | 700509 | Env  |     | N | N | N | N         |                     |            |        |        |                       |
| <i>L. hackeliae</i>       | Lansing 2             | 35250  | Clin |     | N | N | N | N(23)     | Y (17, 21)          |            |        |        | infects and kills(20) |
| <i>L. impletisoli</i>     | OA1-1                 |        | Env  |     | - | - | - |           |                     |            |        |        |                       |
| <i>L. israelensis</i>     | Bercovier 4           | 43119  | Env  |     | N | N | N | N         | N (17)              |            |        |        |                       |
| <i>L. jamestowniensis</i> | JA-26-G1-E2           | 35298  | Clin |     | Y | Y | Y | Y         | Y (17)              |            |        |        |                       |
| <i>L. jordani</i>         | Gorman BL-<br>540     | 33623  | Clin |     | Y | Y | Y | Y         |                     | N (18)     | Y (19) | Y (19) |                       |
| <i>L. lansingensis</i>    | 1677-MI-H             | 49751  | Clin |     | N | N | N | N         |                     |            | N (19) | Y (19) |                       |
| <i>L. LIKE brunensis</i>  | W10-070               |        | ?    |     | Y | Y | Y | Y         |                     |            |        |        |                       |
| <i>L. londiniensis</i>    | 1477                  | 49505  | Env  |     | - | - | - |           | N (17)              |            |        |        |                       |
| <i>L. longbeachae</i>     | D-4968                |        | Clin |     | - | - | - |           |                     |            |        |        |                       |
| <i>L. longbeachae</i>     | NSW150                |        | Clin | 3,9 | Y | Y | Y | Y (24)    |                     |            |        |        |                       |
| <i>L. longbeachae</i>     | Long Beach 4          | 33462  | Clin |     | - | - | - |           | Y(17, 21);<br>N(25) | N (18, 26) |        |        | does not infect (25)  |
| <i>L. longbeachae</i>     | 98072                 |        | ?    |     | - | - | - |           |                     |            |        |        |                       |
| <i>L. maceachernii</i>    | Gorman PX-<br>1-G2-E2 | 35300  | Clin |     | N | N | Y | Y at 72h  | Y (17, 21)          |            | Y (19) | Y (19) |                       |

|                                               |              |          |      |       |   |   |   |            |            |            |        |        |        |                       |
|-----------------------------------------------|--------------|----------|------|-------|---|---|---|------------|------------|------------|--------|--------|--------|-----------------------|
| <i>L. massiliensis</i>                        |              |          | Env  |       | - | - | - |            |            |            |        |        |        |                       |
| <i>L. massiliensis</i>                        | LegA         | 24804    | Env  |       | - | - | - |            |            |            |        |        |        |                       |
| <i>L. micdadei</i>                            | Tatlock      | 33218    | Clin | 0,60  | N | Y | Y | Y 48h (23) |            | N (18, 26) | Y (19) | Y (19) |        |                       |
| <i>L. micdadei</i>                            | 02-42        |          | ?    |       | - | - | - | Y (27)     |            |            |        |        | Y (27) |                       |
| <i>L. moravica</i>                            | 316-86       | 43877    | Env  |       | - | - | - |            | N (17)     |            |        |        |        |                       |
| <i>L. nagasakiensis</i>                       | JCM 15315    | BAA-1557 | Clin |       | N | N | Y | Y at 72h   |            |            |        |        |        |                       |
| <i>L. nautarum</i>                            | 1224         | 49506    | Env  |       | N | N | N | N          |            |            |        |        |        |                       |
| <i>L. norrlandica</i>                         | LEGN         | BAA-2678 | Env  |       | - | - | - |            |            |            |        |        |        |                       |
| <i>L. oakridgensis</i>                        | Oak Ridge 10 | 33761    | Clin |       | Y | Y | N | Y 24-48h   | Y (17, 28) | Y (18)     | Y (19) | Y (19) |        | infects and kills(20) |
| <i>L. oakridgensis</i>                        | RV2-2007     |          | Env  |       | - | - | - |            | Y (28)     |            |        |        |        |                       |
| <i>L. osnabrueckensis</i>                     | W0511934-2   |          | ?    |       | - | - | - |            |            |            |        |        |        |                       |
| <i>L. parisiensis</i>                         | PF-209C-C2   | 35299    | Clin |       | N | Y | Y | Y 48h      | Y (17, 21) |            | Y (19) | Y (19) |        |                       |
| <i>L. pneumophila</i> subsp. <i>pascullei</i> | Brown U8W    | 33737    | Env  |       | Y | Y | Y | Y          |            |            |        |        |        |                       |
| <i>L. pneumophila</i>                         | Paris        |          | Clin | 91,50 | Y | Y | Y | Y          |            |            |        |        |        |                       |
| <i>L. pneumophila</i>                         | Lens         |          | Clin |       | - | - | - | Y          | Y (29)     |            |        |        |        |                       |
| <i>L. pneumophila</i>                         | Philadelphia | 33152    | Clin |       | - | - | - | Y (30)     |            | Y (18, 26) | Y (19) | Y (19) |        | infects and kills(20) |
| <i>L. pneumophila</i>                         | Corby        |          | Clin |       | - | - | - | Y (31)     |            |            |        |        |        | infects and kills(25) |
| <i>L. pneumophila</i>                         | Alcoy        |          | Clin |       | - | - | - |            |            |            |        |        |        |                       |
| <i>L. pneumophila</i>                         | 130b         |          | Clin |       | - | - | - | Y (27)     | Y (32, 33) |            |        |        |        |                       |
| <i>L. pneumophila</i>                         | Lorraine     |          | Clin |       | - | - | - |            |            |            |        |        |        |                       |
| <i>L. pneumophila</i>                         | HL06041035   |          | Env  |       | - | - | - |            |            |            |        |        |        |                       |
| <i>L. pneumophila</i>                         | 570-CO-H     |          | Clin |       | - | - | - |            |            |            |        |        |        |                       |
| <i>L. pneumophila</i>                         | LPE509       |          | Env  |       | - | - | - |            |            |            |        |        |        |                       |

|                                             |               |        |      |     |   |   |   |                |            |                       |        |
|---------------------------------------------|---------------|--------|------|-----|---|---|---|----------------|------------|-----------------------|--------|
| <i>L. pneumophila</i>                       | Thunder Bay   |        | Clin | -   | - | - |   |                |            | infects and kills(25) |        |
| <i>L. pneumophila</i> subsp. <i>fraseri</i> | Los Angeles 1 | 33156  | Clin | N   | N | N | N |                |            | infects and kills(25) |        |
| <i>L. pneumophila</i> subsp. <i>fraseri</i> | Dallas 1E     | 33216  | Env  | -   | - | - |   |                |            |                       |        |
| <i>L. pneumophila</i> subsp. <i>fraseri</i> | Lansing3      | 35251  | Clin | -   | - | - |   |                |            |                       |        |
| <i>L. quateirensis</i>                      | Thacker 1335  | 49507  | Env  | -   | - | - |   |                |            |                       |        |
| <i>L. quinlivanii</i>                       | 1442-AUS-E    | 43830  | Env  | N   | N | N | N | Y (17)         |            |                       |        |
| <i>L. rowbothamii</i>                       | LLAP6         | 700991 | Env  | -   | - | - |   |                |            |                       |        |
| <i>L. rubrilucens</i>                       | WA-270A-C2    | 35304  | Clin | N   | N | N | N | N (17)         |            |                       |        |
| <i>L. sainthelensi</i>                      | MSH-4         | 35248  | Clin | N   | N | N | N | Y (17)         | Y (19)     | Y (19)                |        |
| <i>L. santicrucis</i>                       | SC-63-C7      | 352301 | Env  | -   | - | - |   | Y (17); N (21) |            | Y (19)                |        |
| <i>L. shakespearei</i>                      | CDC 214       | 49655  | Env  | Y   | Y | N |   |                |            |                       |        |
| <i>L. spiritensis</i>                       | Bibb HSH-9    | 35249  | Env  | N   | N | N | N | N (17, 21)     |            |                       |        |
| <i>L. steigerwaltii</i>                     | SC-18-C9      | 35302  | Env  | N   | N | N | N | N (17)         | N (18, 26) |                       |        |
| <i>L. taurinensis</i>                       | Turin I       | 700508 | Env  | Y   | Y | Y | Y |                |            |                       |        |
| <i>L. tucsonensis</i>                       | 1087-AZ-H     | 49180  | Clin | Y   | Y | Y | Y |                |            | N (19)                |        |
| <i>L. wadsworthii</i>                       | 81-716        | 33877  | Clin | 0,2 | N | N | N | N              | N (17, 21) | N (19)                | Y (19) |
| <i>L. waltersii</i>                         | 2074-AUS-E    | 51914  | Env  | -   | - | - |   |                |            |                       |        |
| <i>L. worsleiensis</i>                      | 95/83-1347    | 49508  | Env  | -   | - | - |   |                |            |                       |        |
| <i>L. yabuuchiae</i>                        | OA1-2         |        | Env  | -   | - | - |   |                |            |                       |        |

For each species the capacity to replicate in THP1 cells was compared to the one of *L. pneumophila* strain Paris at time points: 24, 48 and 72h. Y, the species is replicating; N, the species either does not infect or the replication capacity is significantly lower than that of *L. pneumophila* strain Paris. The results of previous studies about infection and replication of particular species in different types of cells or animal models have been collected and are shown in the table. The 5th column shows the Clin frequency of the species most frequently found in clinical cases according to (34) and the 9<sup>th</sup> column that is boxed is the conclusion whether a species can infect or not THP1 cells.

## References

1. Ratcliff RM, Lanser JA, Manning PA, & Heuzenroeder MW (1998) Sequence-based classification scheme for the genus *Legionella* targeting the mip gene. *J Clin Microbiol* 36(6):1560-1567.
2. Rice P, Longden I, & Bleasby A (2000) EMBOSS: the European Molecular Biology Open Software Suite. *Trends Genet* 16(6):276-277.
3. Aziz RK, *et al.* (2008) The RAST Server: rapid annotations using subsystems technology. *BMC Genomics* 9:75.
4. Li L, Stoeckert CJ, Jr., & Roos DS (2003) OrthoMCL: identification of ortholog groups for eukaryotic genomes. *Genome Res* 13(9):2178-2189.
5. Edgar RC (2004) MUSCLE: a multiple sequence alignment method with reduced time and space complexity. *BMC Bioinformatics* 5:113.
6. Castresana J (2000) Selection of conserved blocks from multiple alignments for their use in phylogenetic analysis. *Mol Biol Evol* 17(4):540-552.
7. Stamatakis A, *et al.* (2012) RAxML-Light: a tool for computing terabyte phylogenies. *Bioinformatics* 28(15):2064-2066.
8. Cohen O, Ashkenazy H, Belinky F, Huchon D, & Pupko T (2010) GLOOME: gain loss mapping engine. *Bioinformatics* 26(22):2914-2915.
9. Mitchell A, *et al.* (2015) The InterPro protein families database: the classification resource after 15 years. *Nucleic Acids Res* 43(Database issue):D213-221.
10. Notredame C, Higgins DG, & Heringa J (2000) T-Coffee: A novel method for fast and accurate multiple sequence alignment. *J Mol Biol* 302(1):205-217.
11. Price MN, Dehal PS, & Arkin AP (2009) FastTree: computing large minimum evolution trees with profiles instead of a distance matrix. *Mol Biol Evol* 26(7):1641-1650.
12. Letunic I & Bork P (2016) Interactive tree of life (iTOL) v3: an online tool for the display and annotation of phylogenetic and other trees. *Nucleic Acids Res* 44(W1):W242-245.
13. Rolando M, *et al.* (2016) *Legionella pneumophila* SIP-lyase targets host sphingolipid metabolism and restrains autophagy. *Proc Natl Acad Sci U S A* 113(7):1901-1906.
14. de Felipe KS, *et al.* (2008) *Legionella* eukaryotic-like type IV substrates interfere with organelle trafficking. *PLoS Pathog* 4(8):e1000117.
15. Nagai H & Kubori T (2011) Type IVB Secretion Systems of *Legionella* and Other Gram-Negative Bacteria. *Front Microbiol* 2:136.
16. Guglielmini J, de la Cruz F, & Rocha EP (2013) Evolution of conjugation and type IV secretion systems. *Mol Biol Evol* 30(2):315-331.
17. O'Connell WA, Dhand L, & Cianciotto NP (1996) Infection of macrophage-like cells by *Legionella* species that have not been associated with disease. *Infect Immun* 64(10):4381-4384.
18. Neumeister B, Schöniger S, Faigle M, Eichner M, & Dietz K (1997) Multiplication of different *Legionella* species in Mono Mac 6 cells and in *Acanthamoeba castellanii*. *Appl Environ Microbiol* 63(4):1219-1224.
19. Izu K, *et al.* (1999) Grouping of 20 reference strains of *Legionella* species by the growth ability within mouse and guinea pig macrophages. *FEMS Immunol Med Microbiol* 26(1):61-68.
20. Fields BS, *et al.* (1986) Comparison of guinea pig and protozoan models for determining virulence of *Legionella* species. *Infect Immun* 53(3):553-559.
21. Alli OA, Zink S, von Lackum NK, & Abu-Kwaik Y (2003) Comparative assessment of virulence traits in *Legionella* spp. *Microbiology* 149.

22. Maruta K, *et al.* (1998) Entry and intracellular growth of *Legionella dumoffii* in alveolar epithelial cells. *Am J Respir Crit Care Med* 157(6 Pt 1):1967-1974.
23. Gomez-Valero L, *et al.* (2014) Comparative analyses of Legionella species identifies genetic features of strains causing Legionnaires' disease. *Genome Biol* 15(11):505.
24. Wood RE, Newton P, Latomanski EA, & Newton HJ (2015) Dot/Icm Effector Translocation by *Legionella longbeachae* Creates a Replicative Vacuole Similar to That of *Legionella pneumophila* despite Translocation of Distinct Effector Repertoires. *Infect Immun* 83(10):4081-4092.
25. Doyle RM, Cianciotto NP, Banvi S, Manning PA, & Heuzenroeder MW (2001) Comparison of virulence of *Legionella longbeachae* strains in guinea pigs and U937 macrophage-like cells. *Infect Immun* 69(9):5335-5344.
26. Walz JM, Gerhardt H, Faigle M, Wolburg H, & Neumeister B (2000) *Legionella* species of different human prevalence induce different rates of apoptosis in human monocytic cells. *APMIS* 108(6):398-408.
27. Newton HJ, Sansom FM, Bennett-Wood V, & Hartland EL (2006) Identification of *Legionella pneumophila*-specific genes by genomic subtractive hybridization with *Legionella micdadei* and identification of *lpnE*, a gene required for efficient host cell entry. *Infect Immun* 74(3):1683-1691.
28. Brzuszkiewicz E, *et al.* (2013) *Legionella oakridgensis* ATCC 33761 genome sequence and phenotypic characterization reveals its replication capacity in amoebae. *Int J Med Microbiol* 303(8):514-528.
29. Ferhat M, *et al.* (2009) The TolC protein of *Legionella pneumophila* plays a major role in multi-drug resistance and the early steps of host invasion. *PLoS One* 4(11):e7732.
30. Levesque S, *et al.* (2014) Genomic characterization of a large outbreak of *Legionella pneumophila* serogroup 1 strains in Quebec City, 2012. *PLoS One* 9(8):e103852.
31. Vinzing M, *et al.* (2008) NAIP and Ipaf control *Legionella pneumophila* replication in human cells. *J Immunol* 180(10):6808-6815.
32. Doyle RM, *et al.* (1998) Sequence analysis of the mip gene of the soilborne pathogen *Legionella longbeachae*. *Infect Immun* 66(4):1492-1499.
33. O'Connell WA, Hickey EK, & Cianciotto NP (1996) A *Legionella pneumophila* gene that promotes hemin binding. *Infect Immun* 64(3):842-848.
34. Yu VL, *et al.* (2002) Distribution of *Legionella* species and serogroups isolated by culture in patients with sporadic community-acquired legionellosis: an international collaborative survey. *J Infect Dis* 186(1):127-128.



Figure S2

A

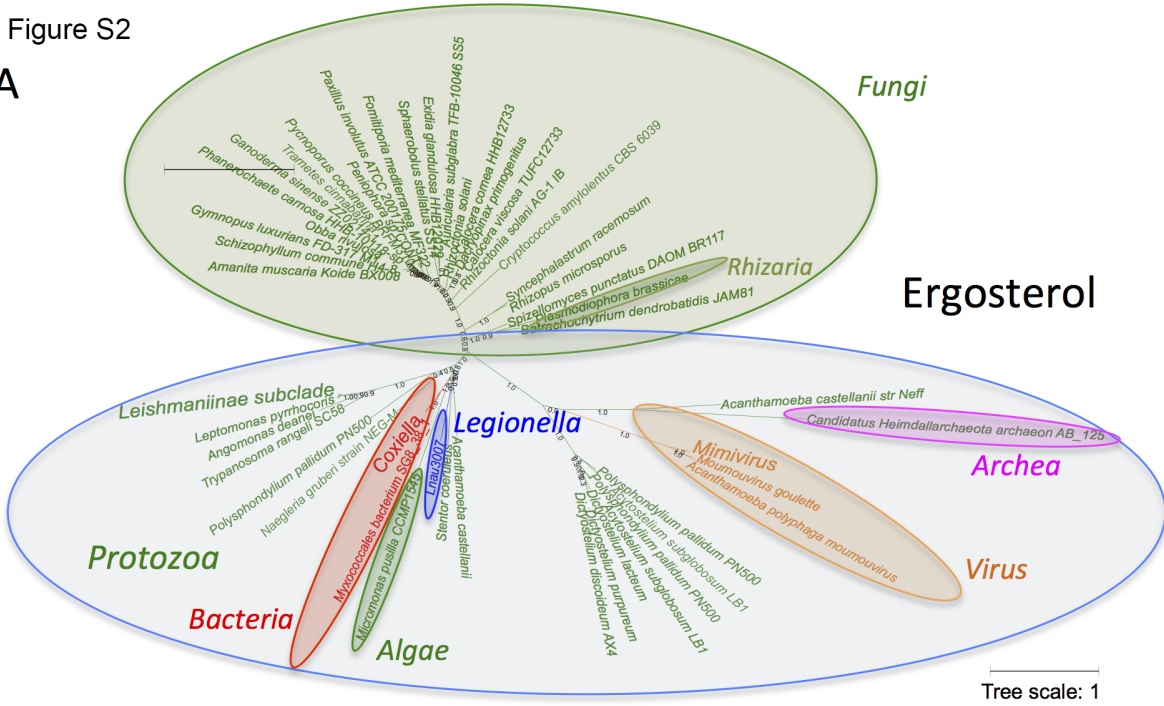

B

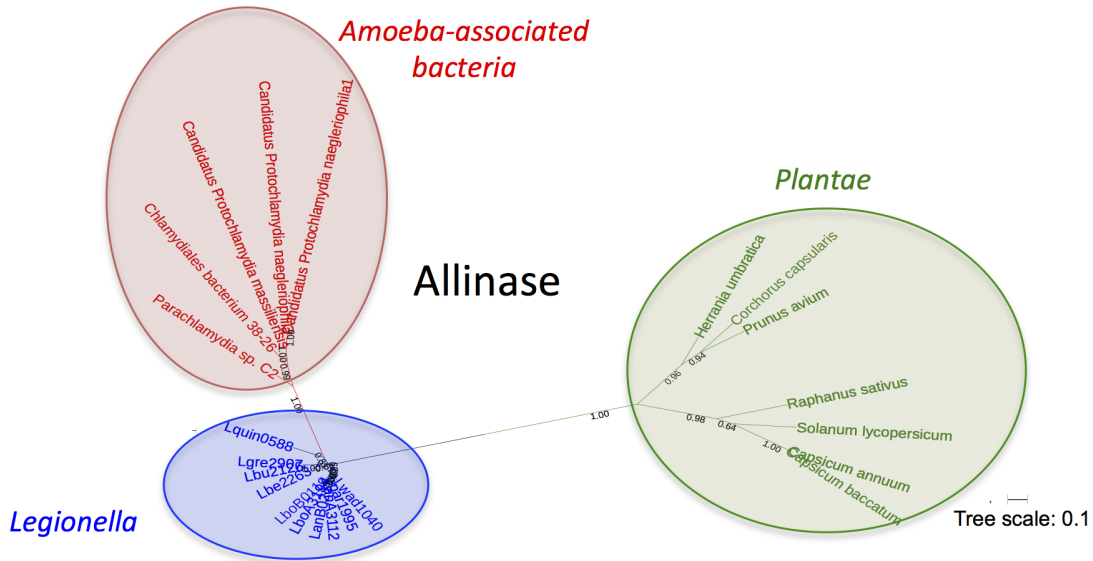

C

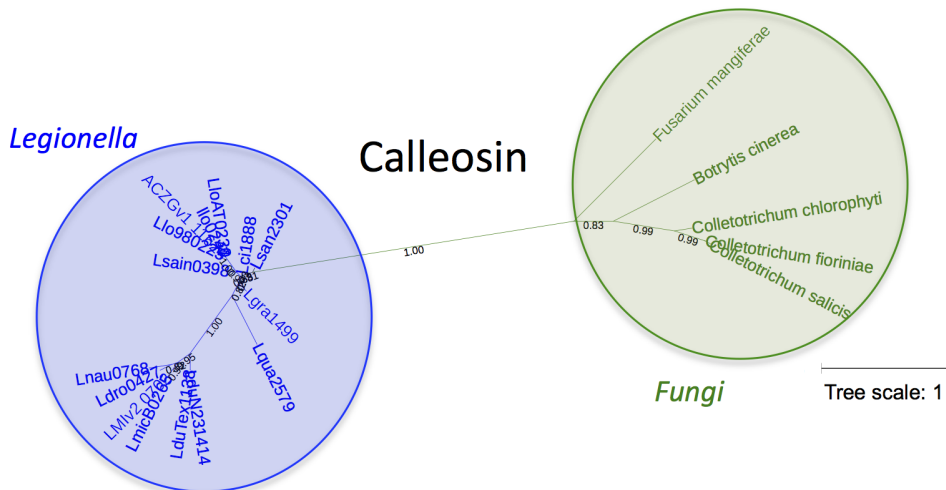



Figure S3

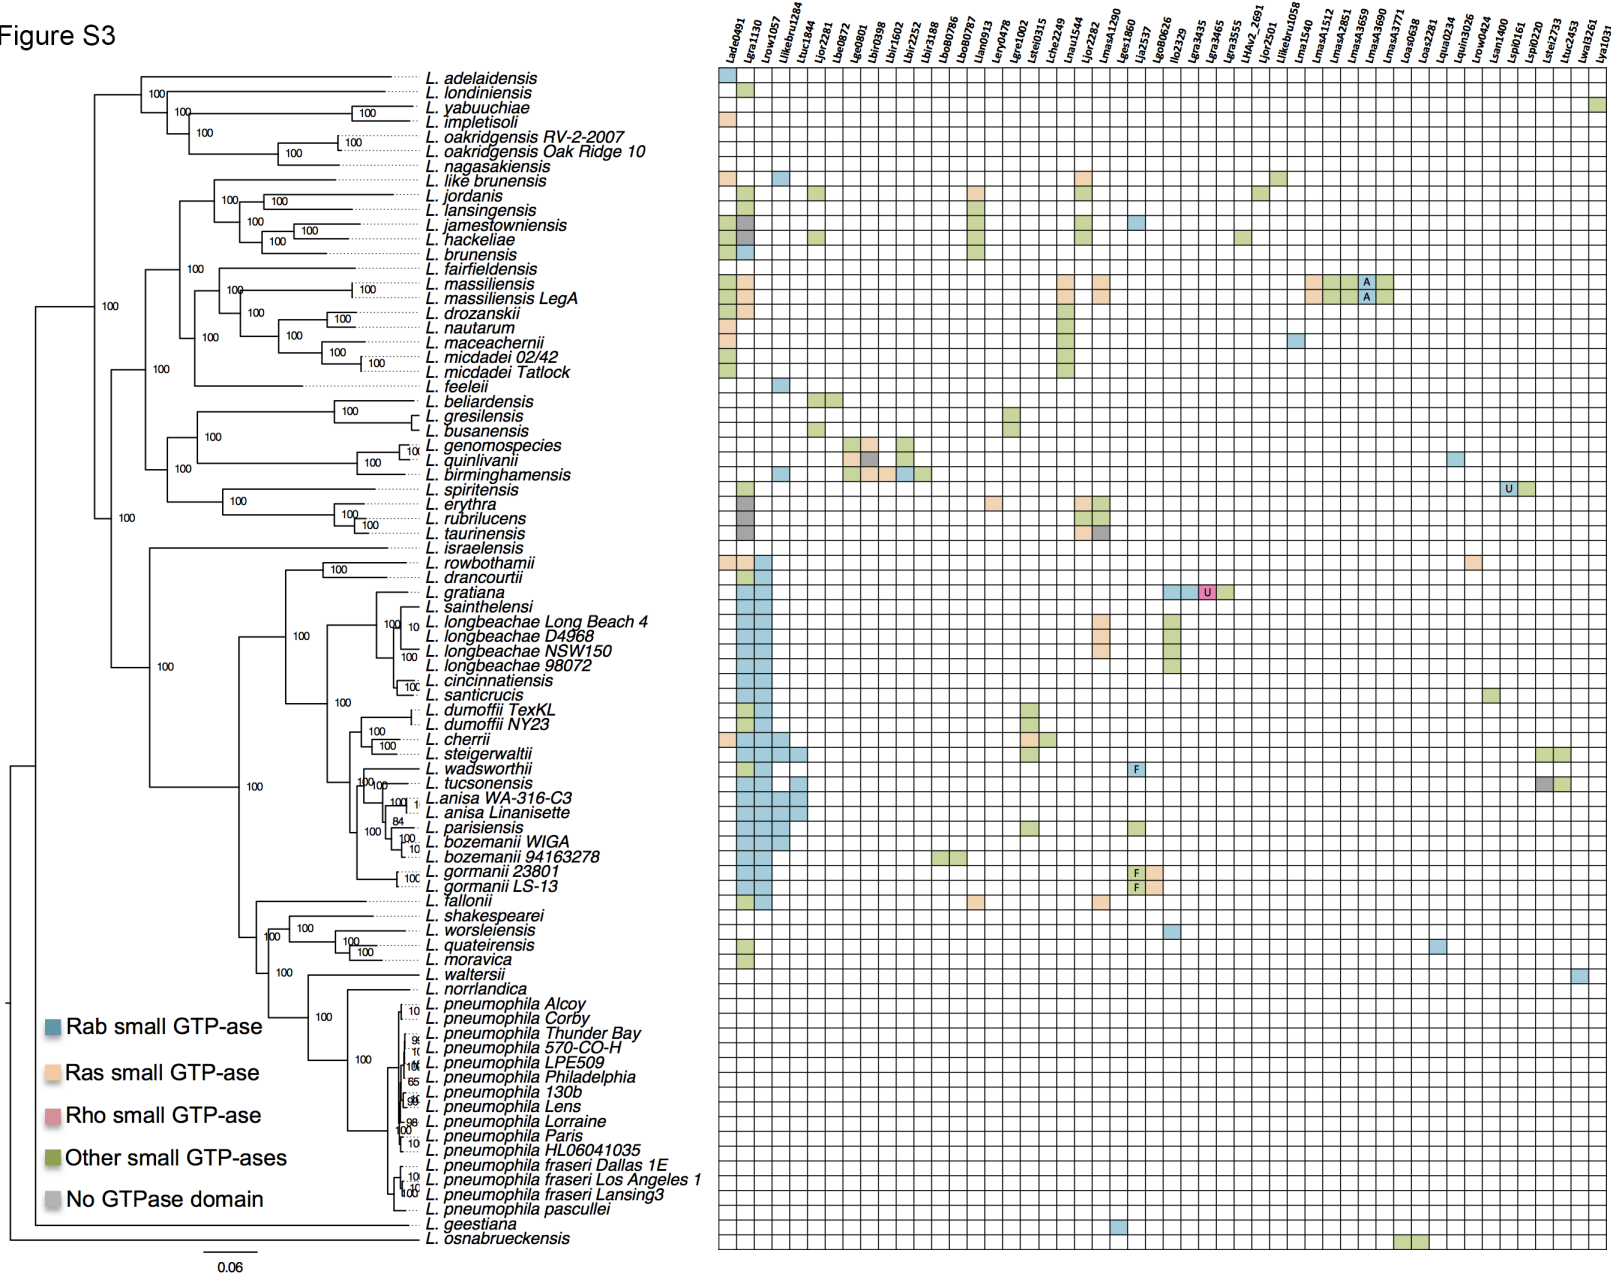





A Figure S6

Protist →

Giant virus ↓

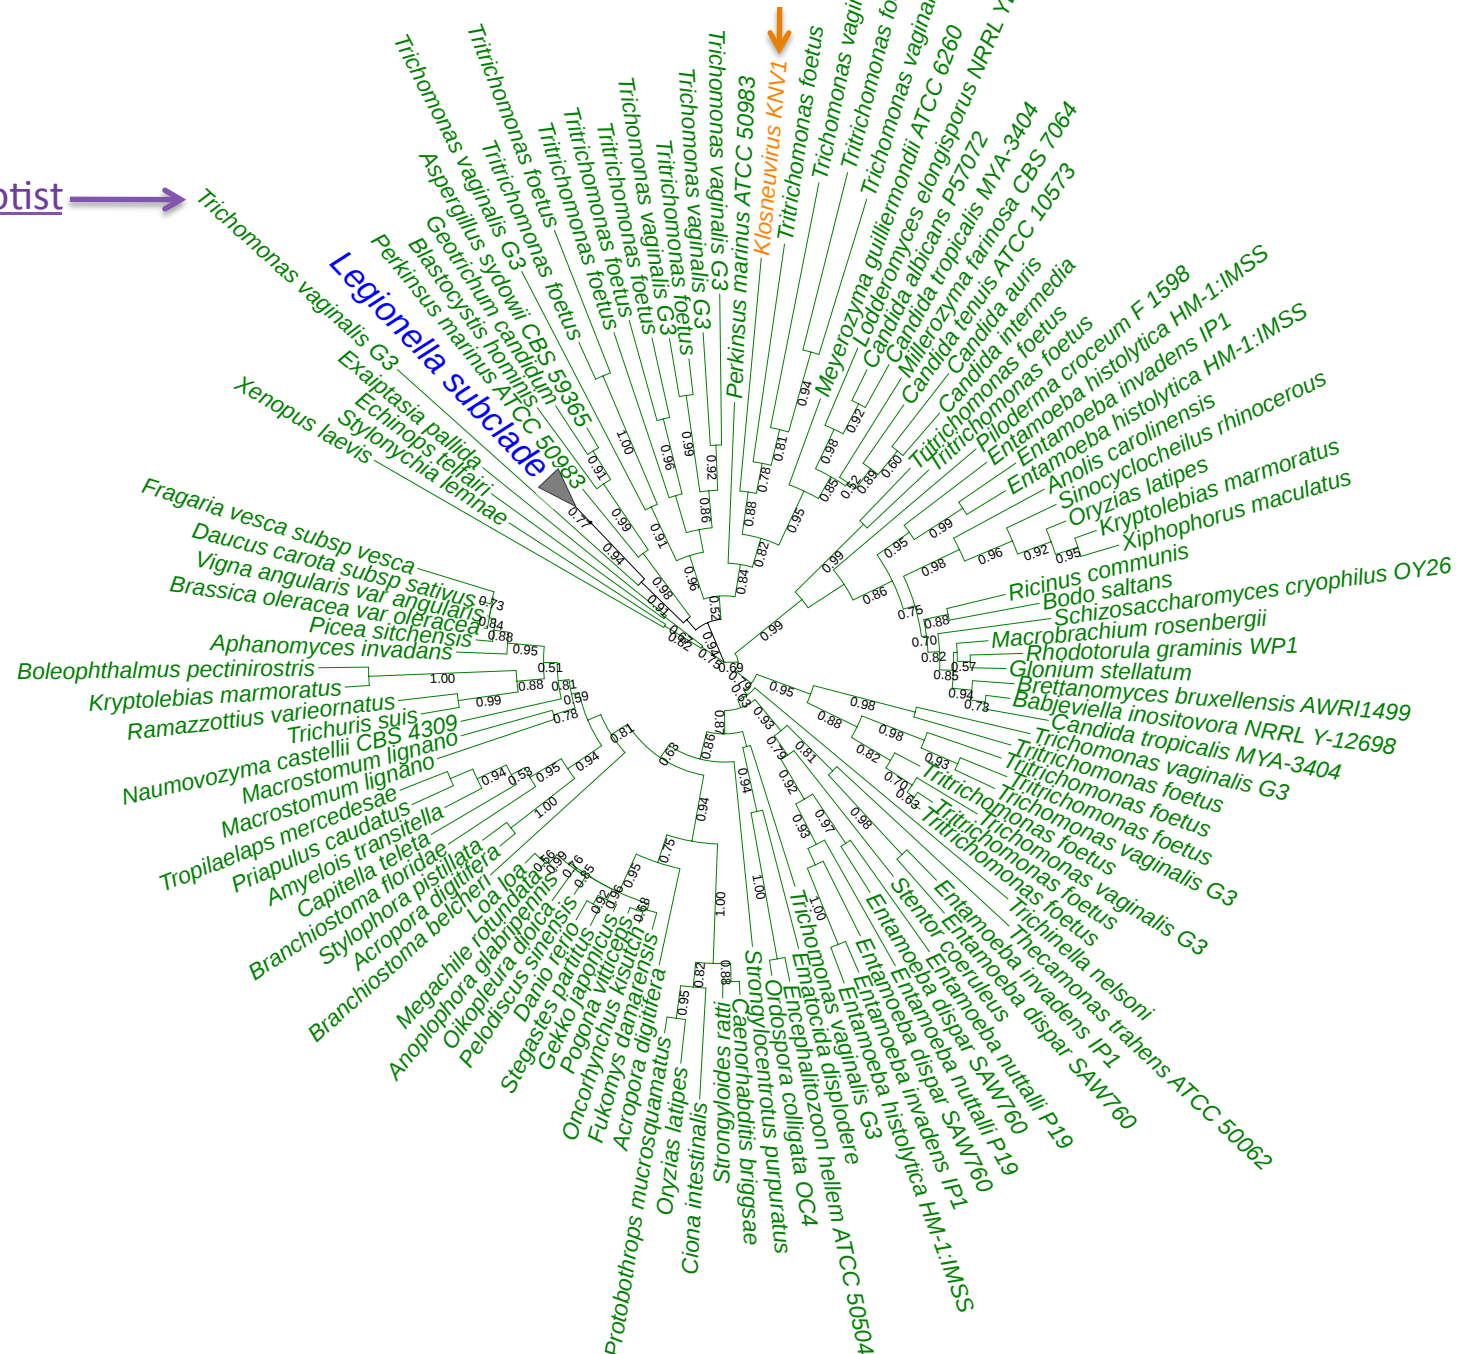



C

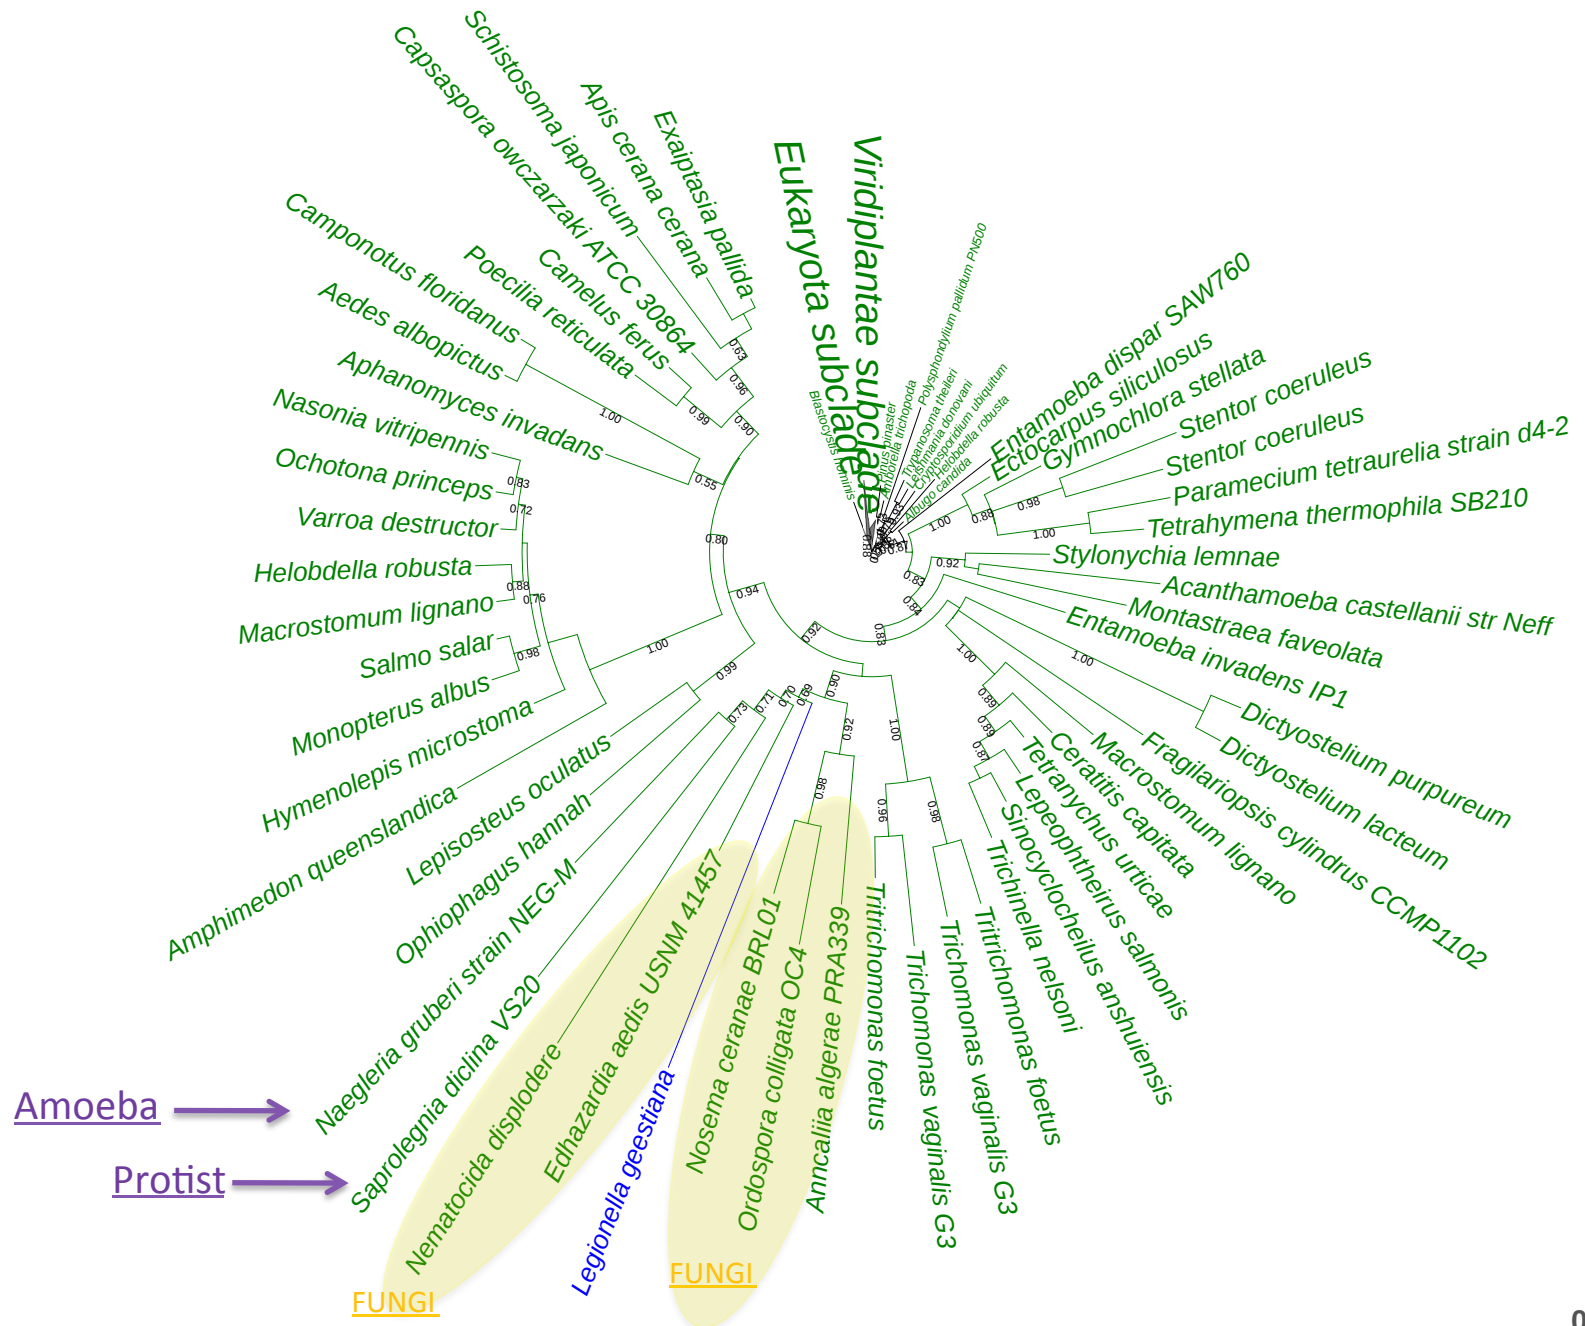

D

Legionella

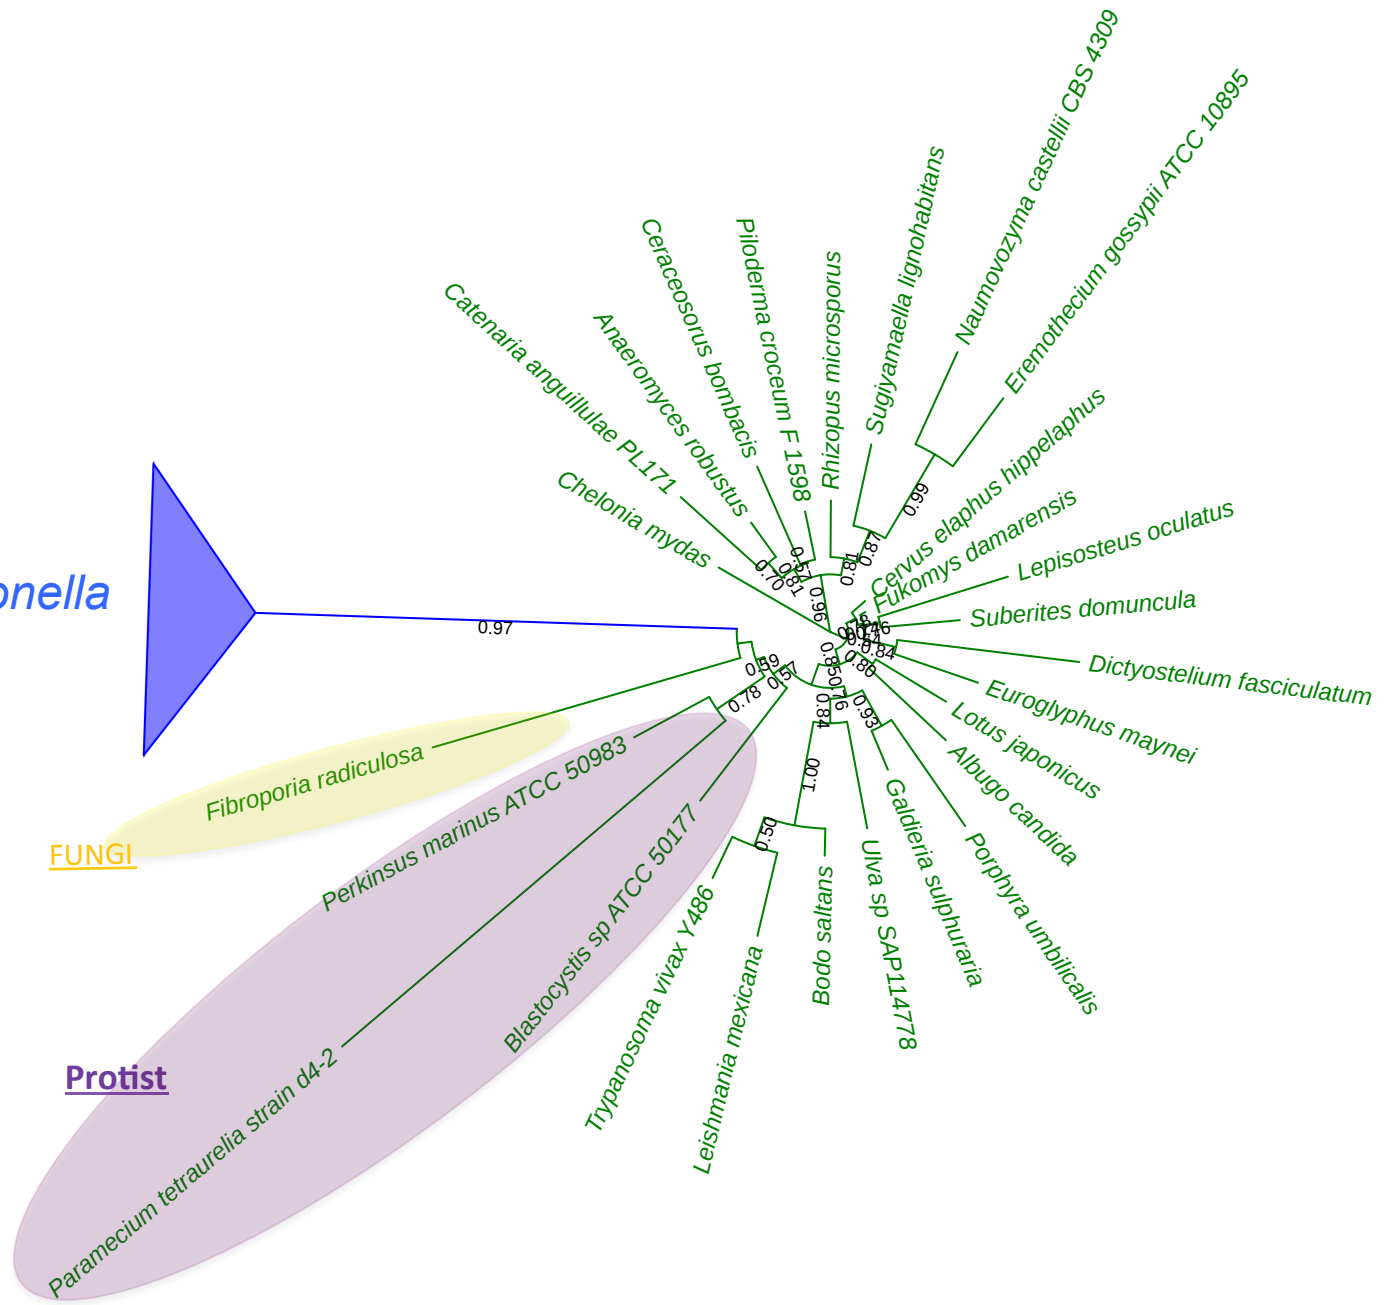

FUNGI

Protist





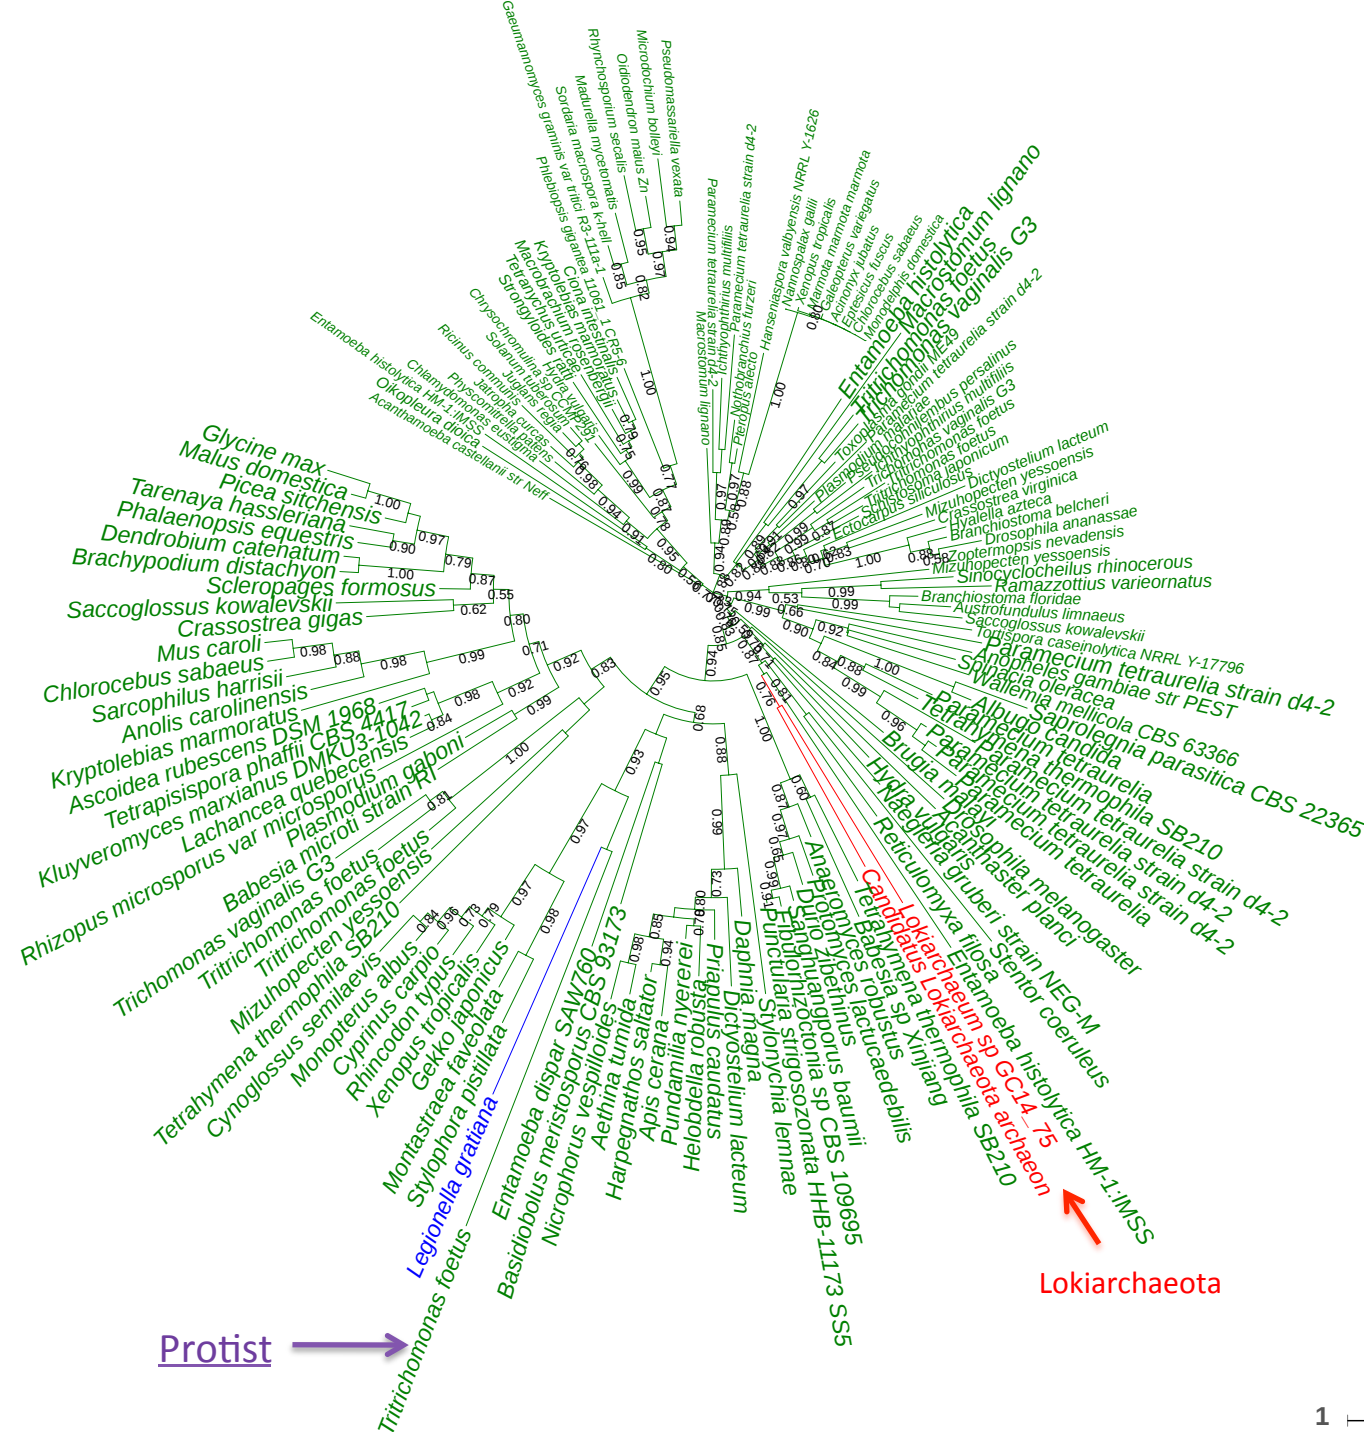

Protist →

Lokiarchaeota

G

Protist →

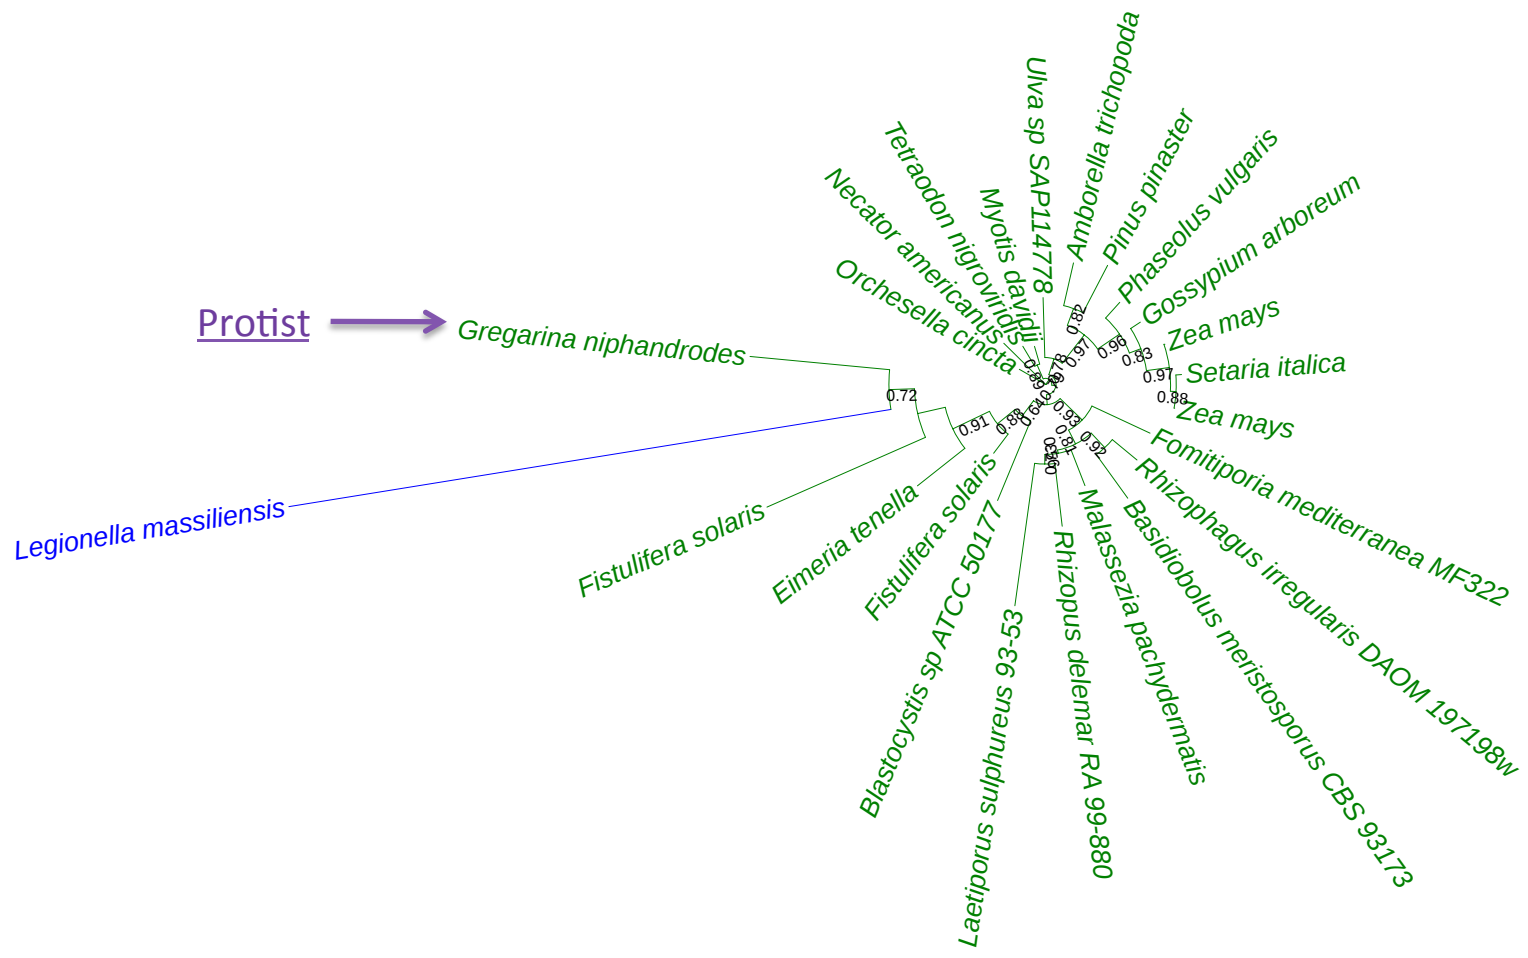



Amoeba →

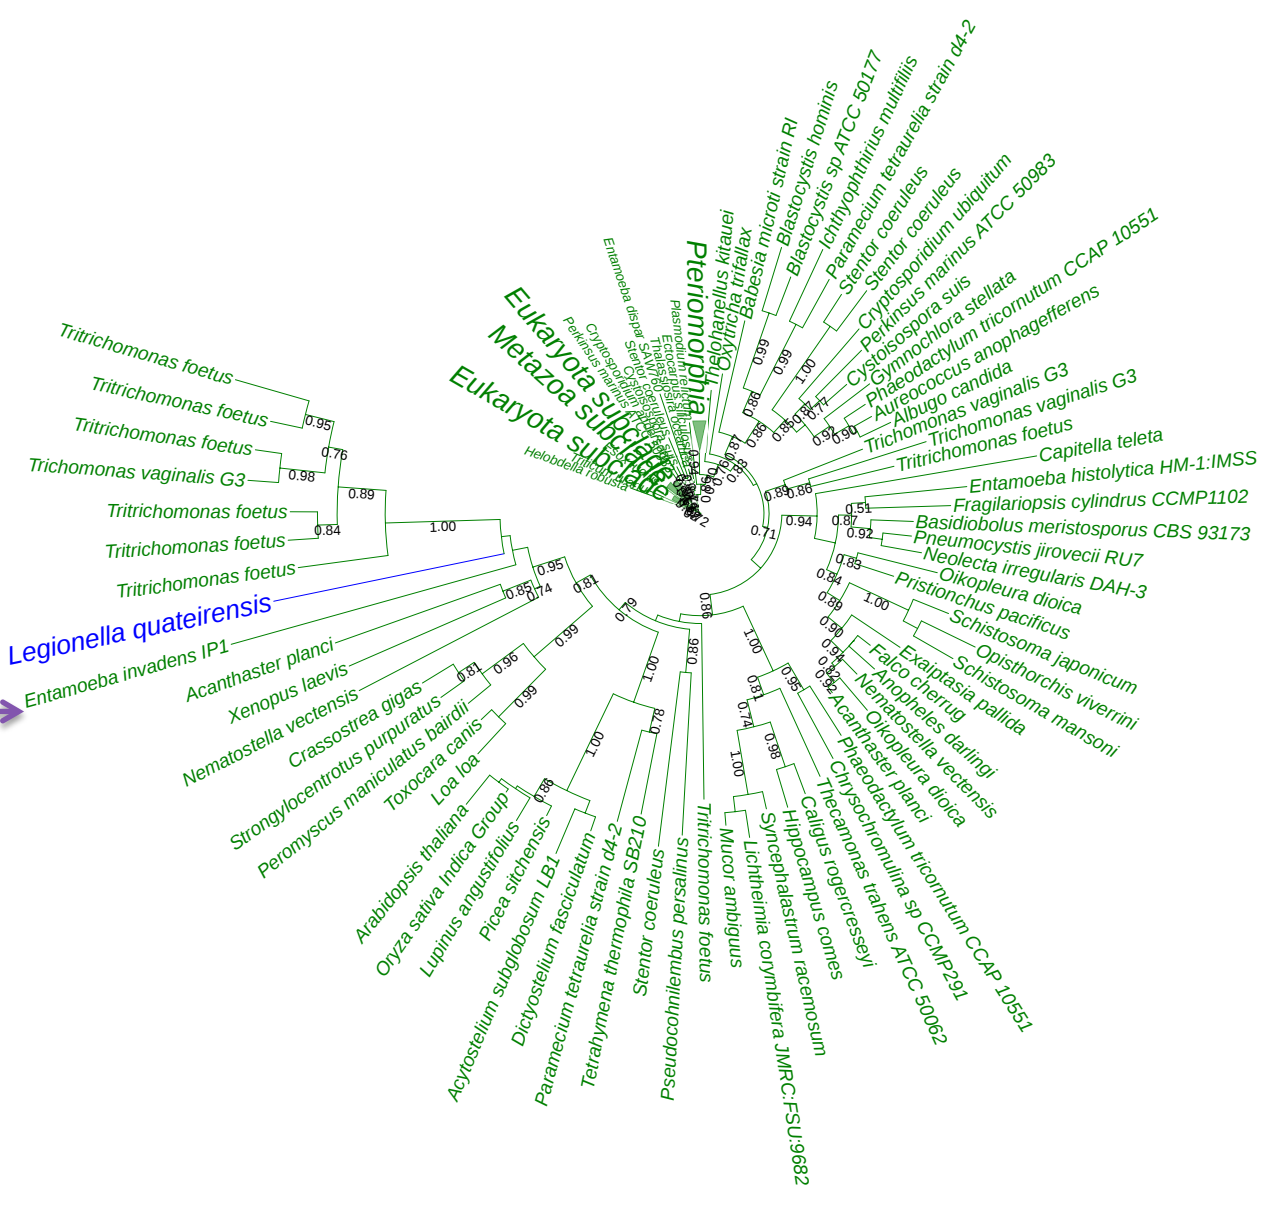

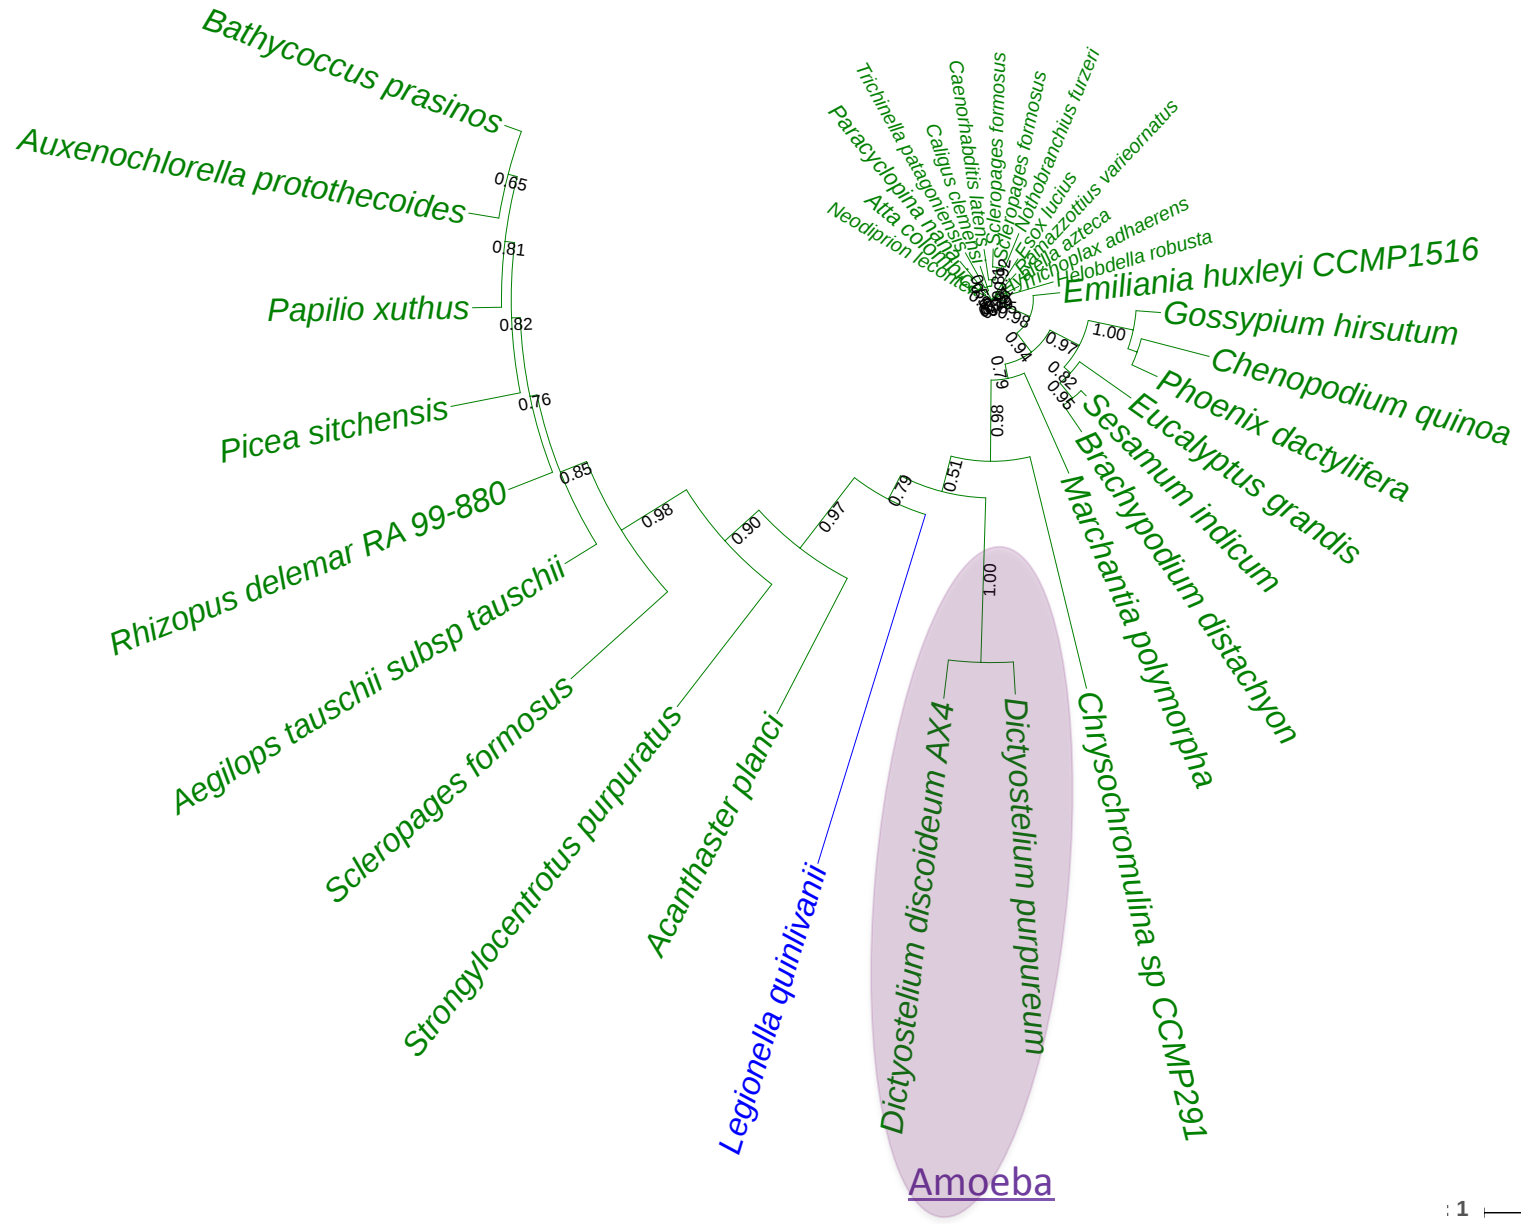

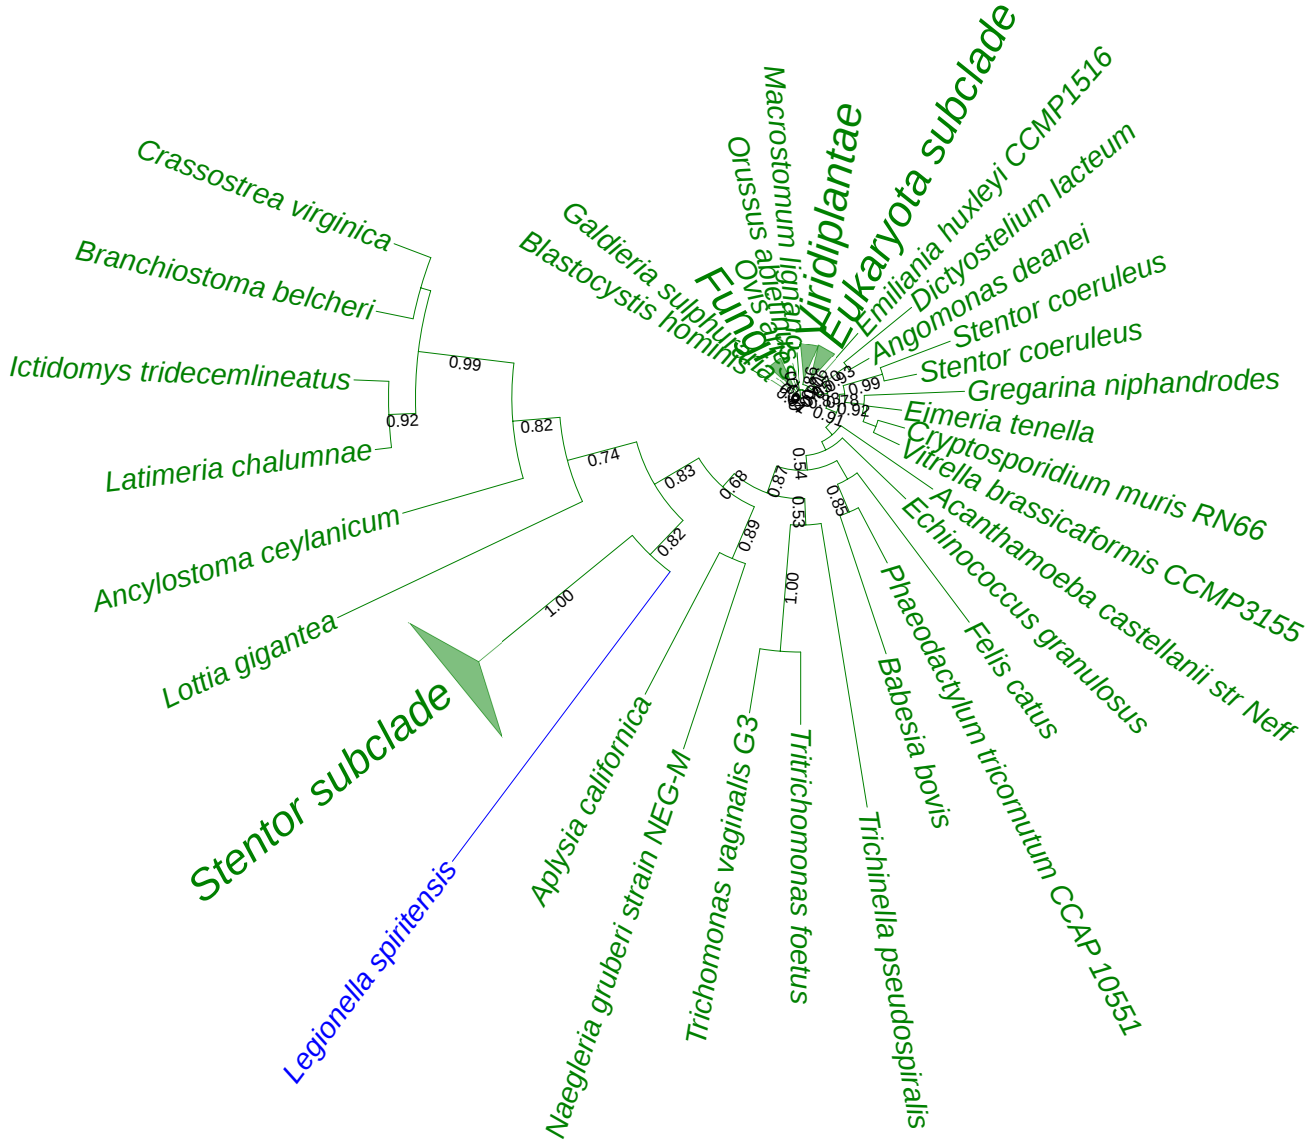

L

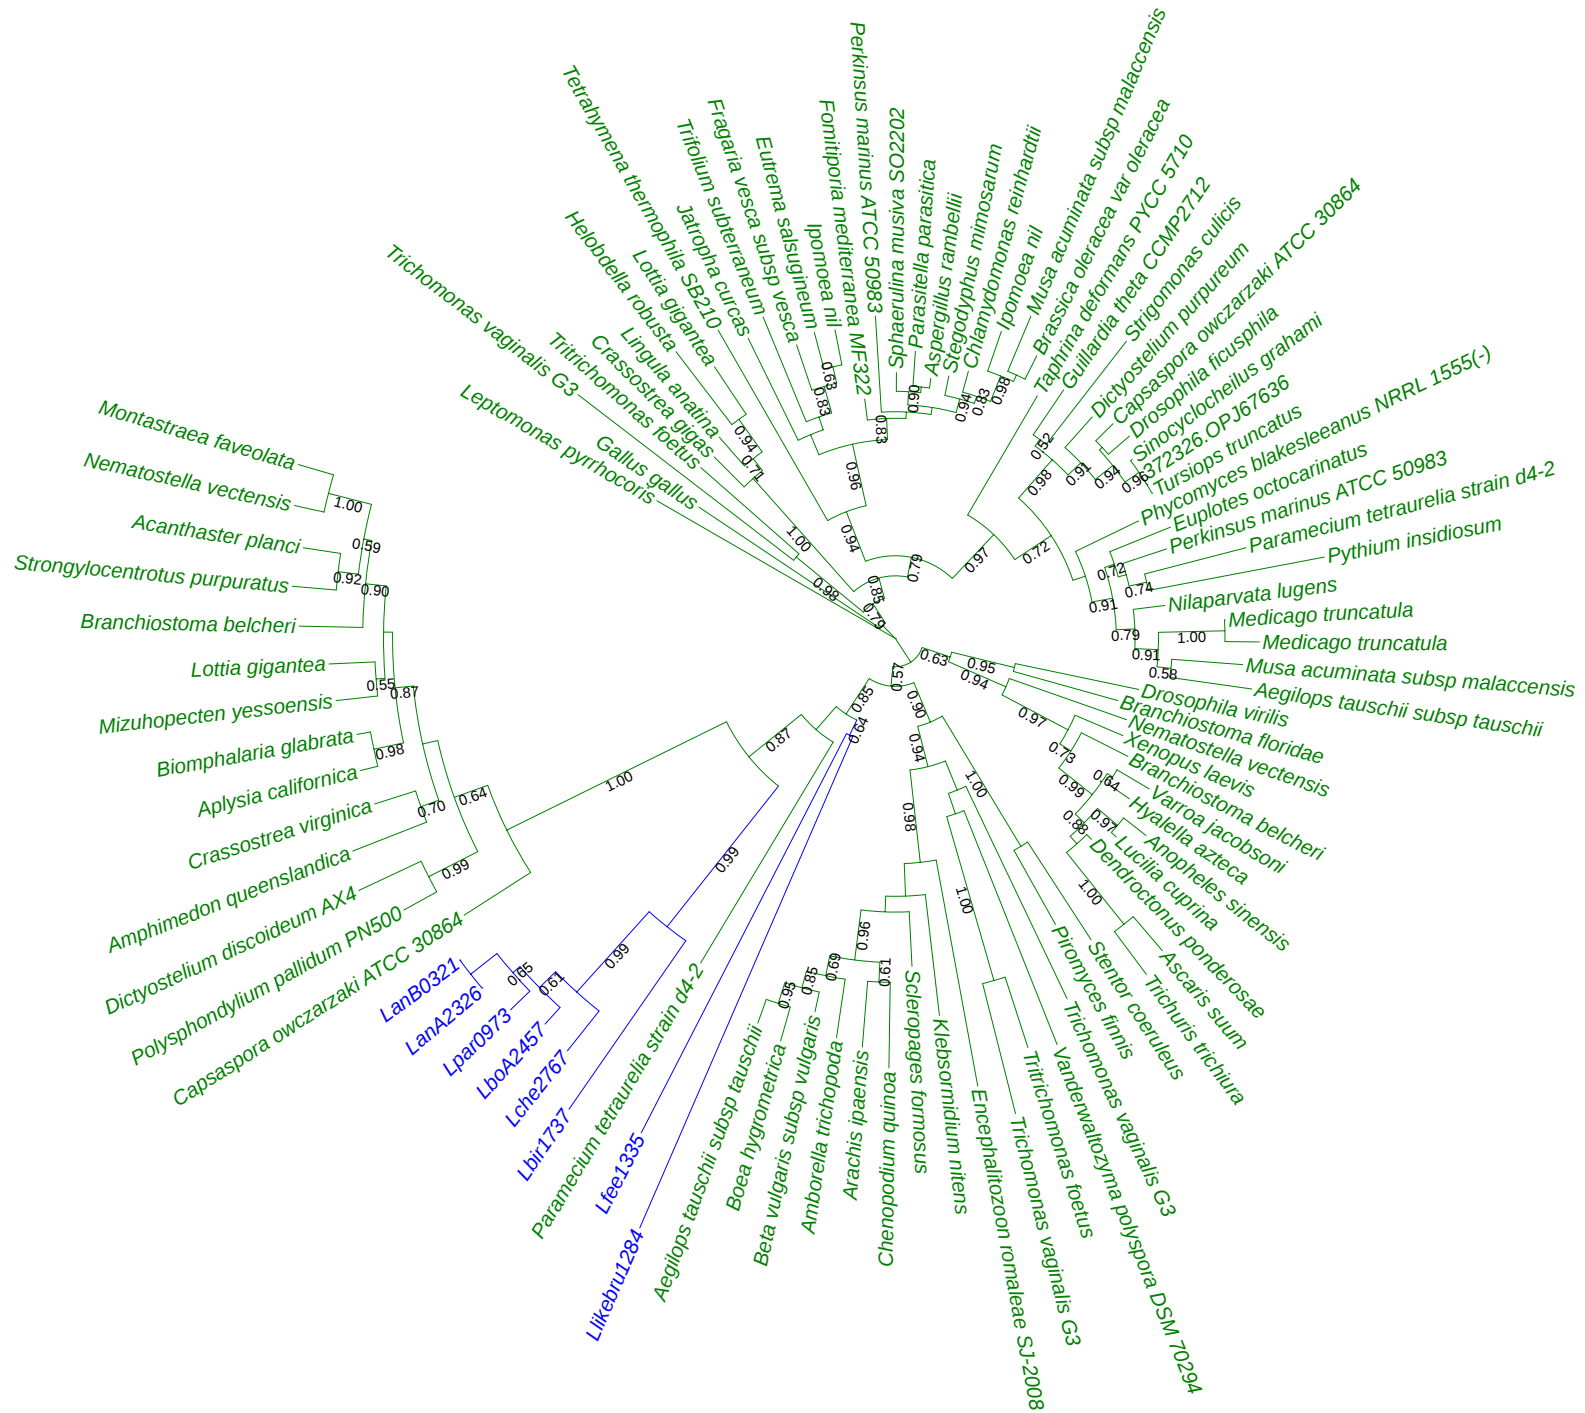

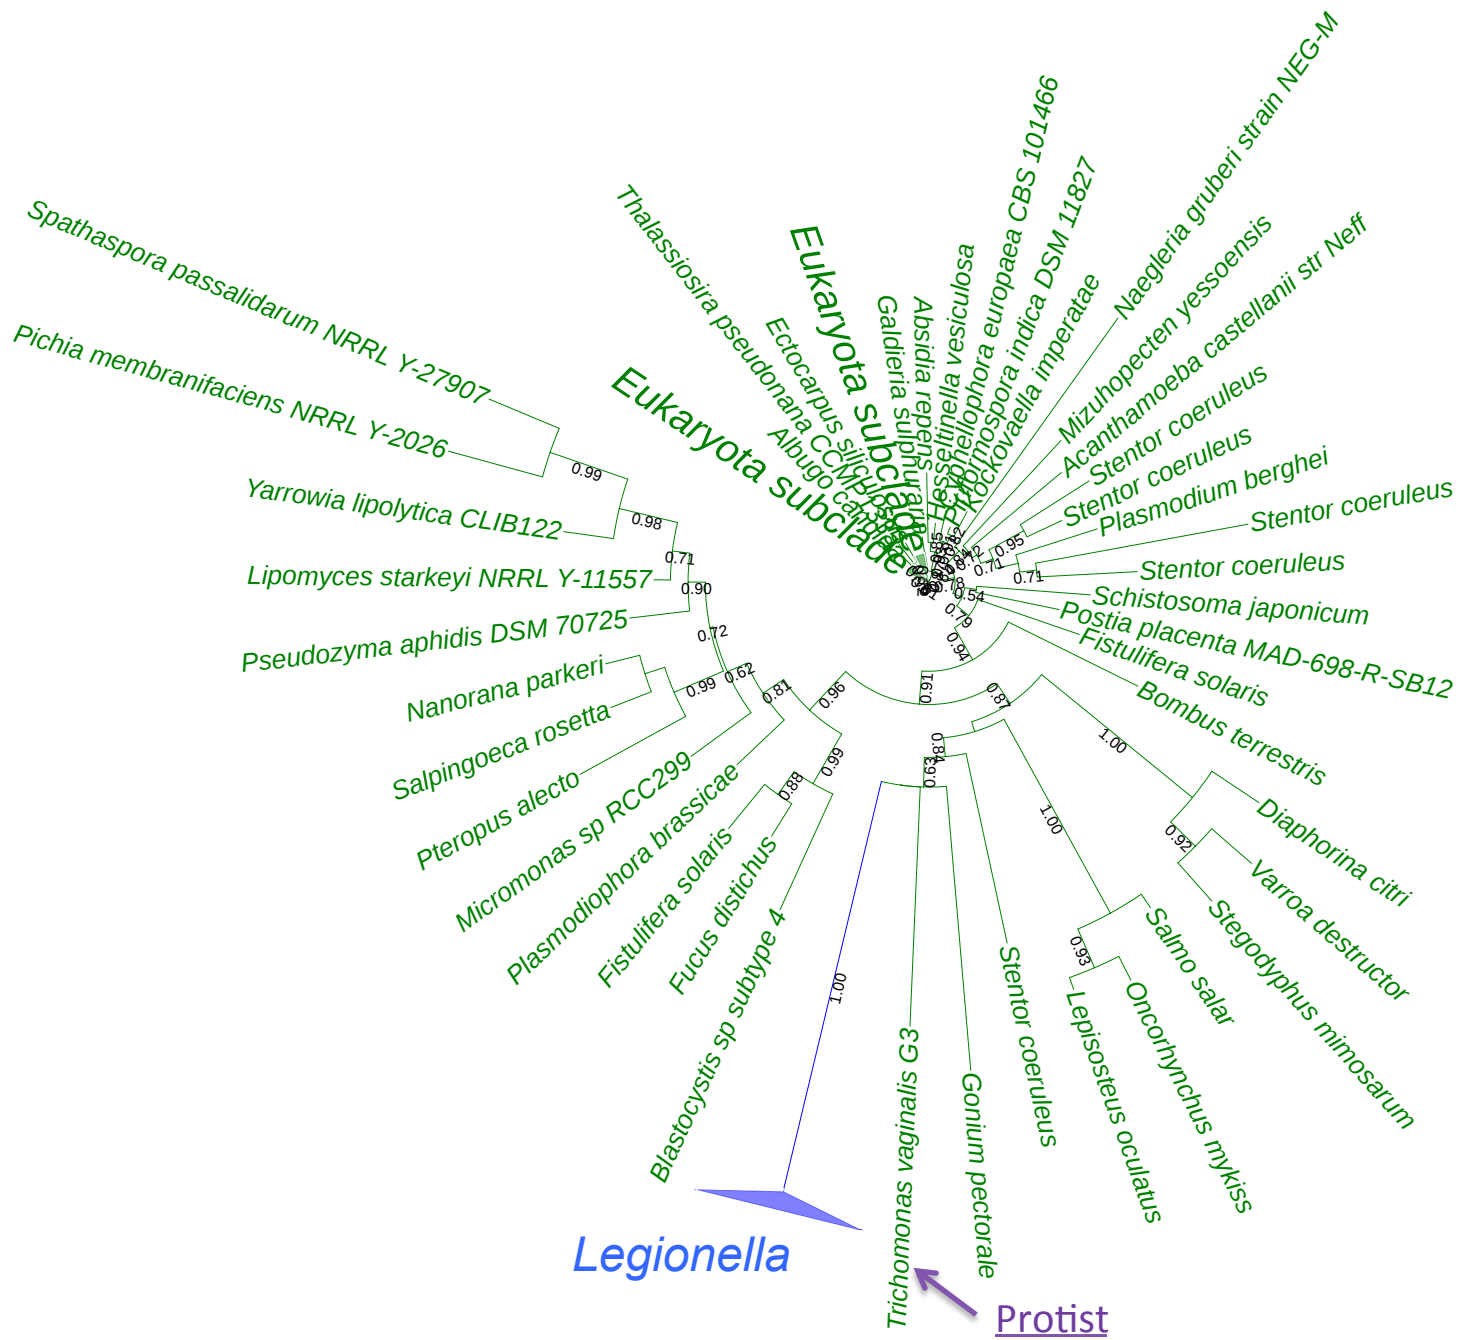



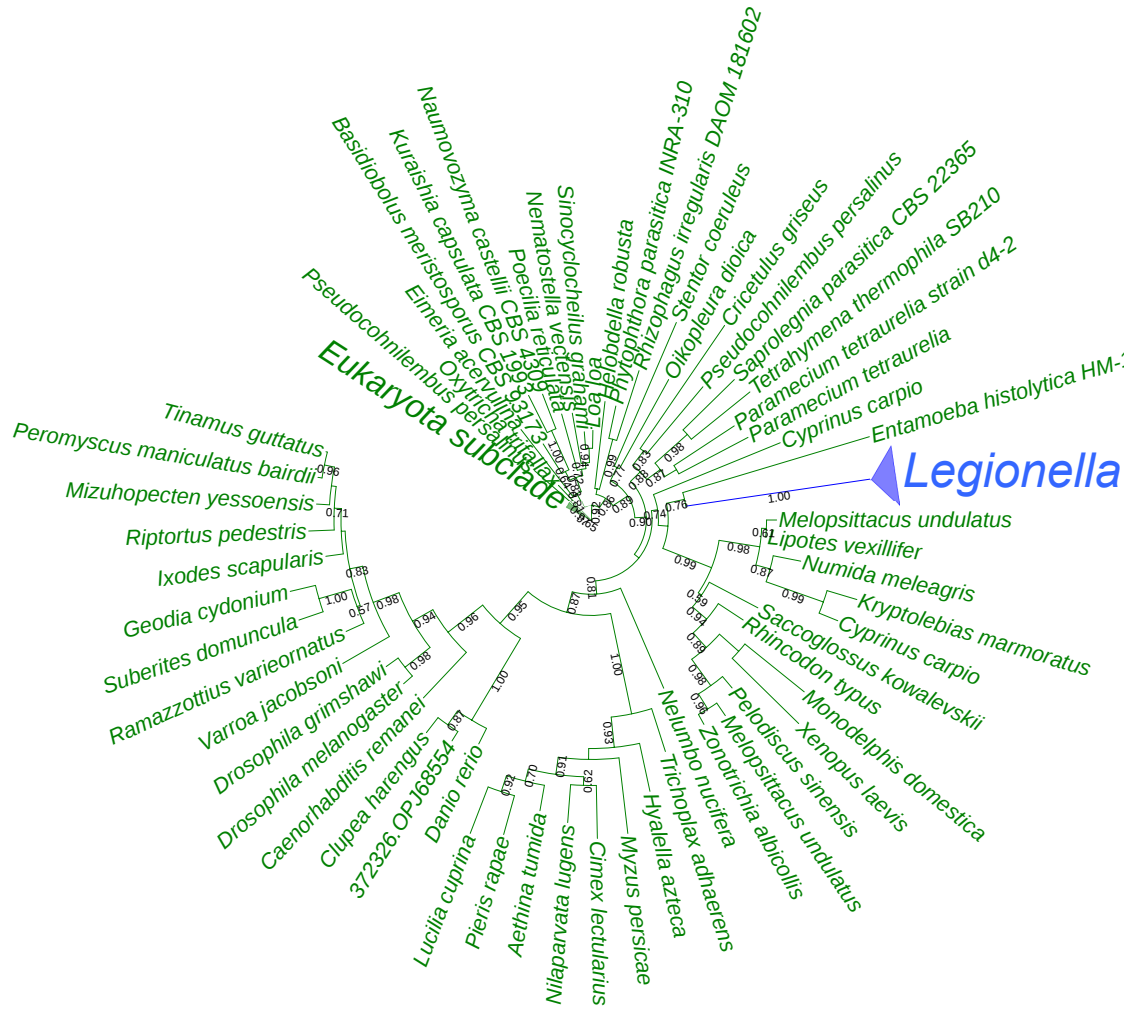

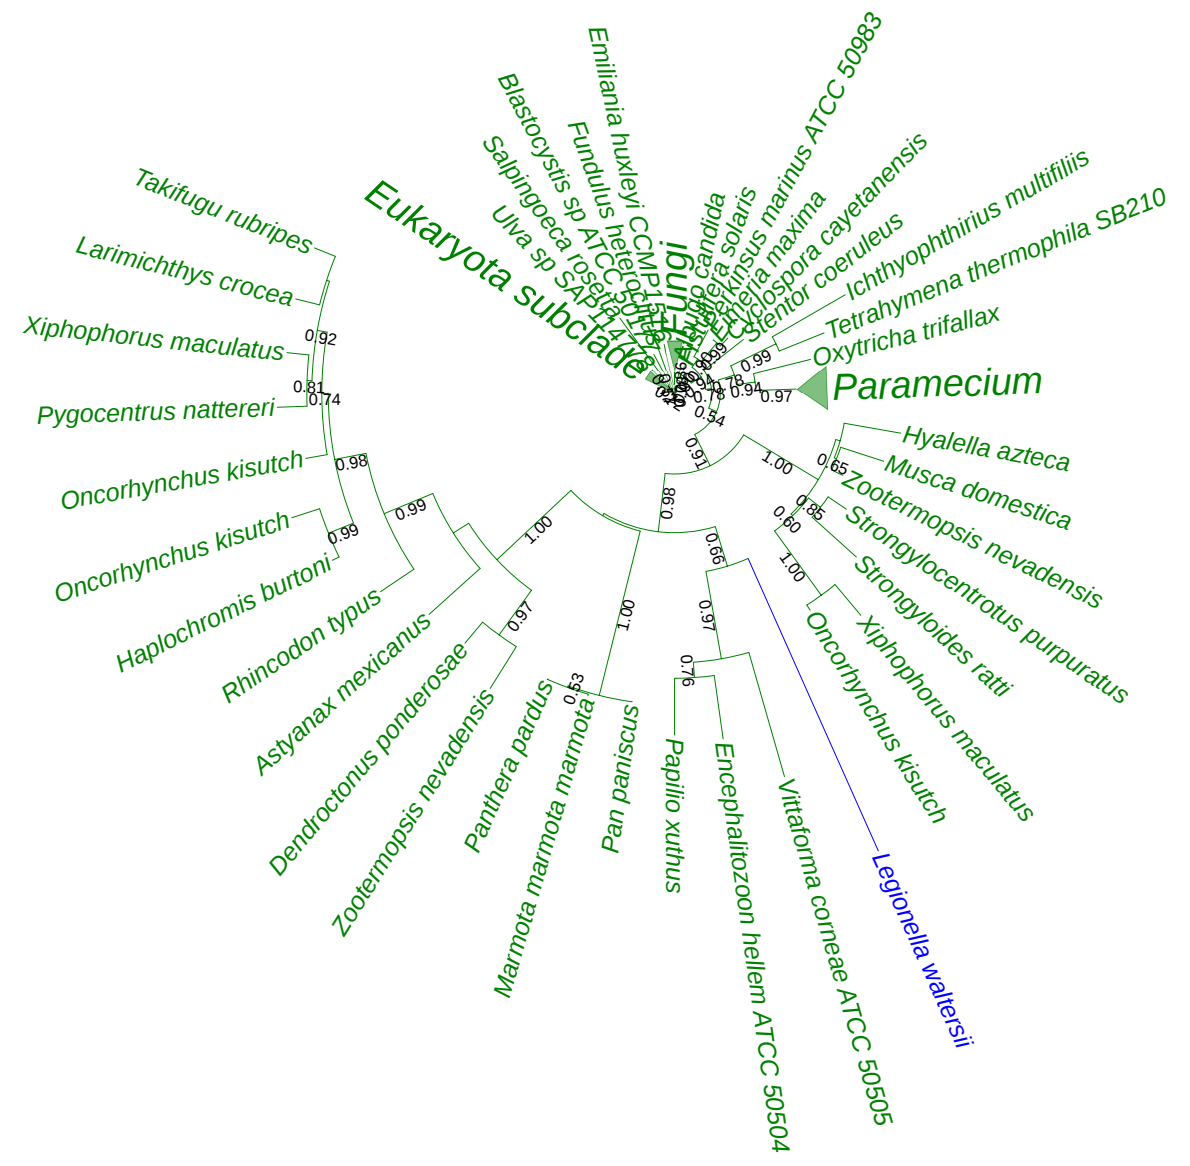



Figure S7

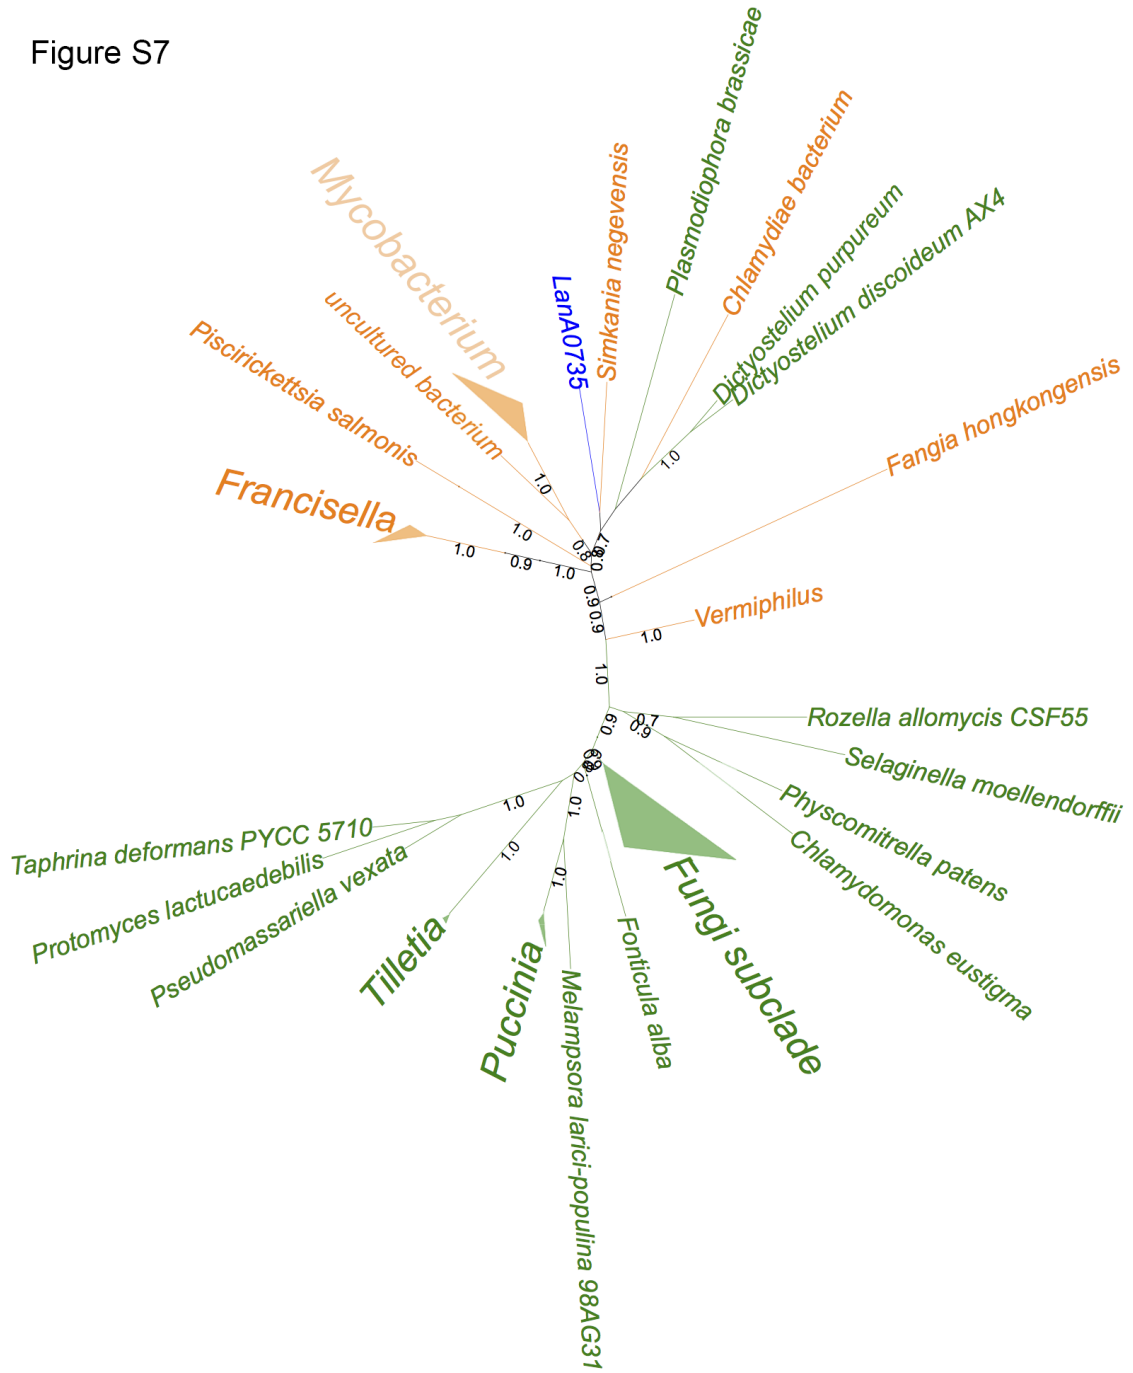

Figure S8

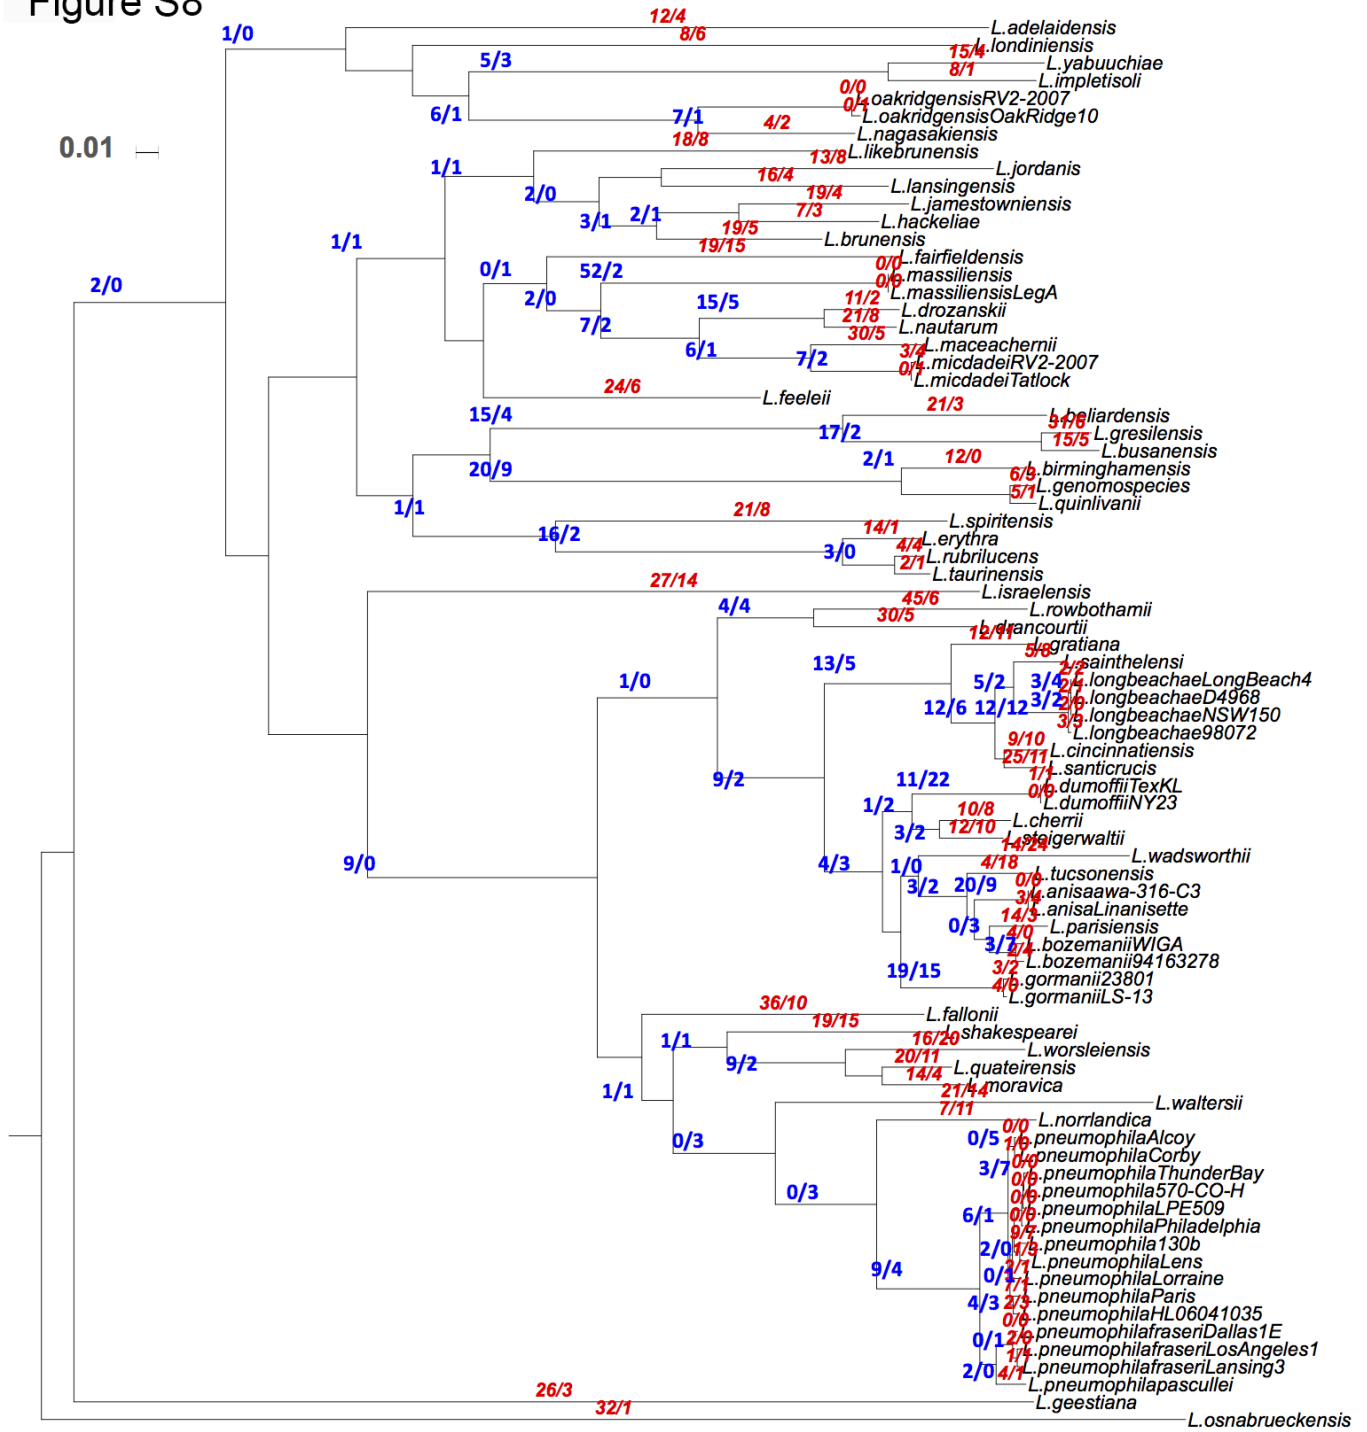

Figure S9

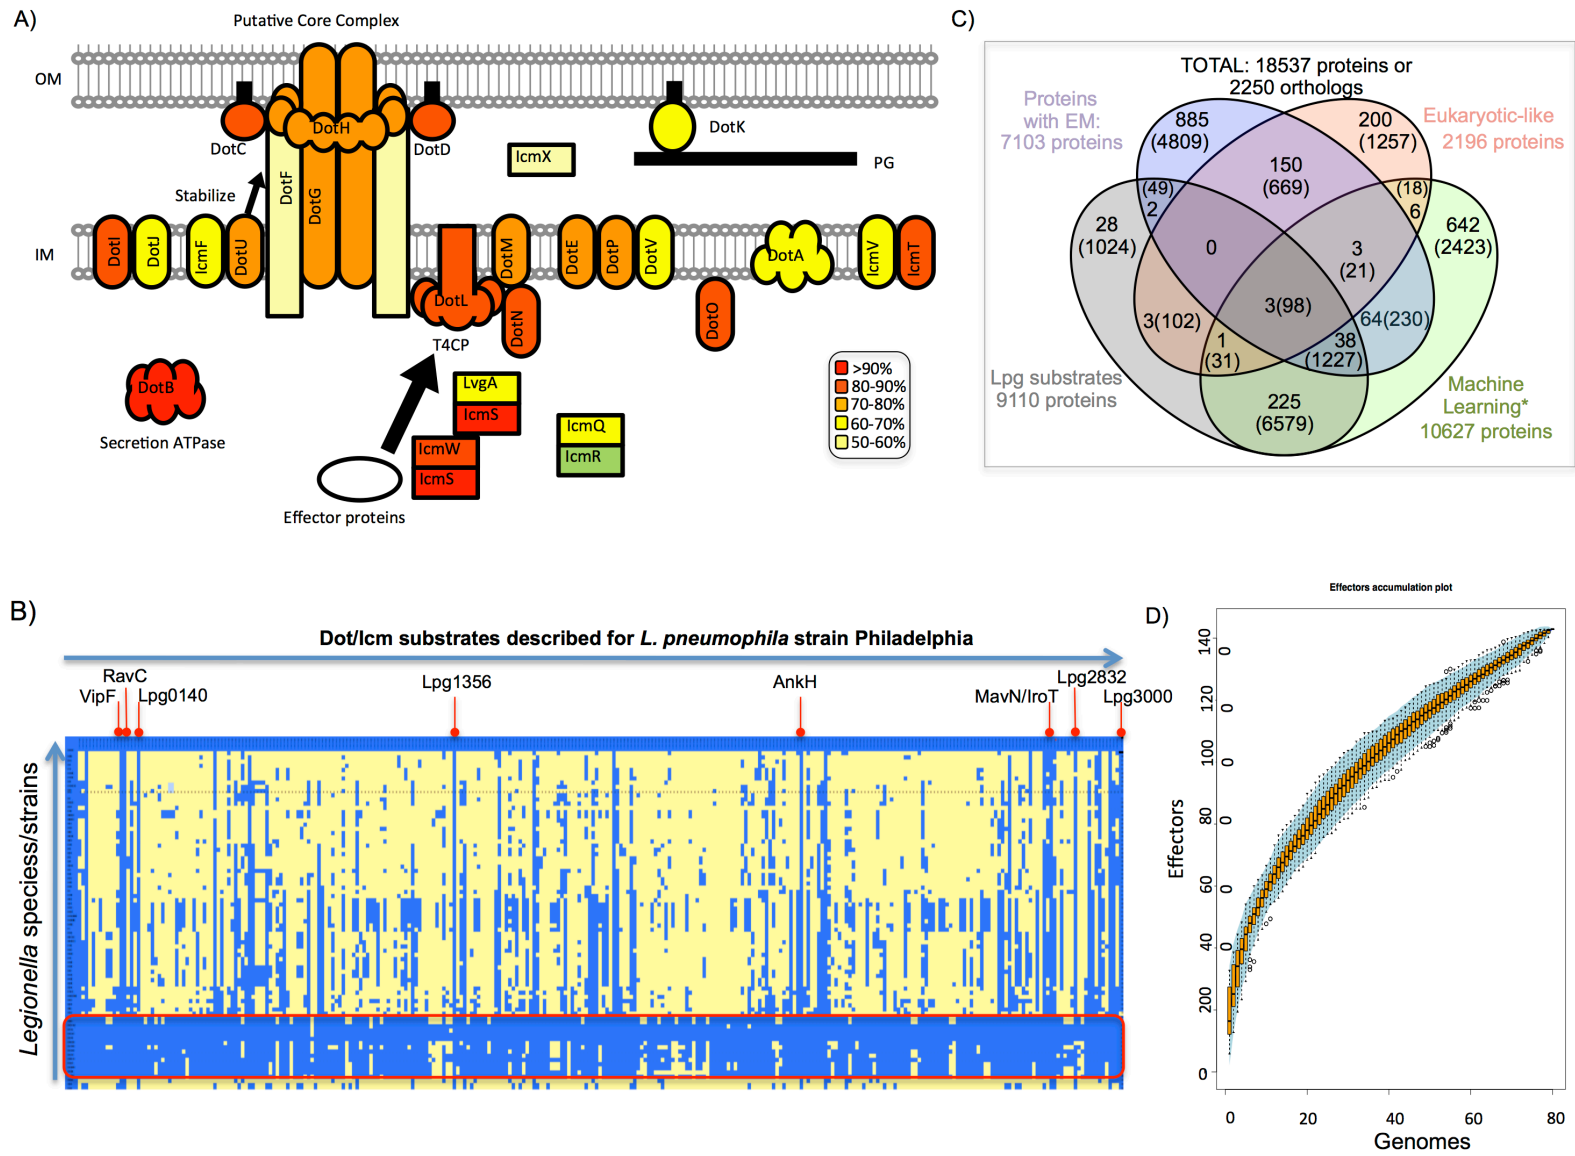

Figure S10

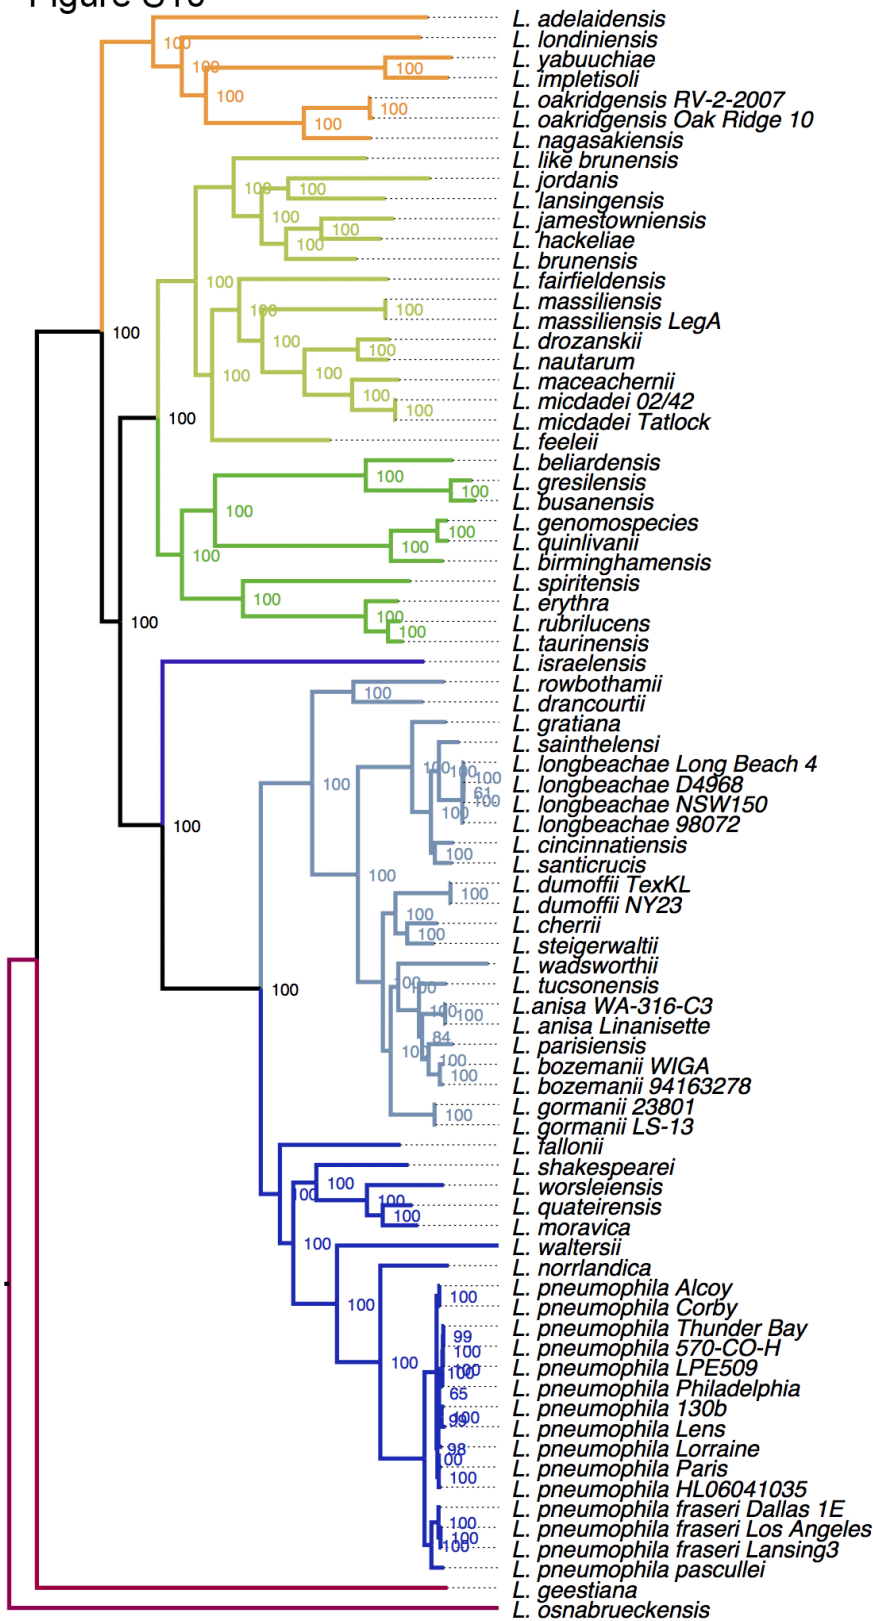

0.06

| Putative <i>icmR</i> genes |            |
|----------------------------|------------|
| Lad1472                    |            |
| Llon2017                   |            |
| Lya0191                    |            |
| Lim1913                    |            |
| LoakB2127                  |            |
| LoakA2436                  |            |
| Lna2432                    |            |
| Llikebru0284               |            |
| Ljor1880                   |            |
| Llan2226                   |            |
| Lja1041                    |            |
| LHAv2_2397                 |            |
| Lbru1922                   |            |
| Lfair1119                  |            |
| LmasA1219                  |            |
| LmasB1219                  |            |
| Ldro0224                   |            |
| Lnau1308                   |            |
| Lma0769                    | Lma0770    |
| LmicB2010                  | LmicB2009  |
| LMiv2_2528                 | LMiv2_2527 |
| Lfe1575                    |            |
| Lbe2728                    |            |
| Lgre0165                   |            |
| Lbu1930                    |            |
| Lge0164                    |            |
| Lquin2160                  |            |
| Lbir0469                   |            |
| Lspi2212                   |            |
| Lery0069                   |            |
| Lrub0882                   | Lrub0883   |
| Ltau1269                   |            |
| Lis0610                    | Lis0611    |
| Lrow2098                   |            |
| Ldra3307                   |            |
| Lgra0792                   |            |
| Lsain0124                  |            |
| LloAT2984                  |            |
| ACZGv1_20168               |            |
| llo2793                    |            |
| Lio982980                  |            |
| Lcin2221                   |            |
| Lsan0115                   |            |
| LduTex2679                 |            |
| LduN2322595                |            |
| Lche1896                   |            |
| Lstei2286                  |            |
| Lwad1623                   |            |
| Lhuc1625                   |            |
| LanB0124                   |            |
| LanA2698                   |            |
| Lpar2148                   |            |
| LboA0982                   |            |
| LboB1356                   |            |
| LgoB2687                   |            |
| LgoA0132                   |            |
| LFAv2_2680                 |            |
| LshaDSM2424                |            |
| Lwor2109                   |            |
| Lqual1606                  |            |
| Lmo2687                    |            |
| Lwal0428                   |            |
| Lno2514                    |            |
| LpAlc0510                  |            |
| LPC_2900                   |            |
| LpThu0446                  |            |
| Lp570C0452                 |            |
| LpLPE2739                  |            |
| lpg0443                    |            |
| Lp130b0558                 |            |
| lpl0485                    |            |
| LPOv2_0509                 |            |
| lpp0509                    |            |
| LPVv2_0543                 |            |
| LpFRAB1765                 |            |
| LpFRA1871                  |            |
| LpFRAC0853                 |            |
| LpPAS2715                  |            |
| Lges2285                   |            |
| Loas0911                   |            |

Figure S11

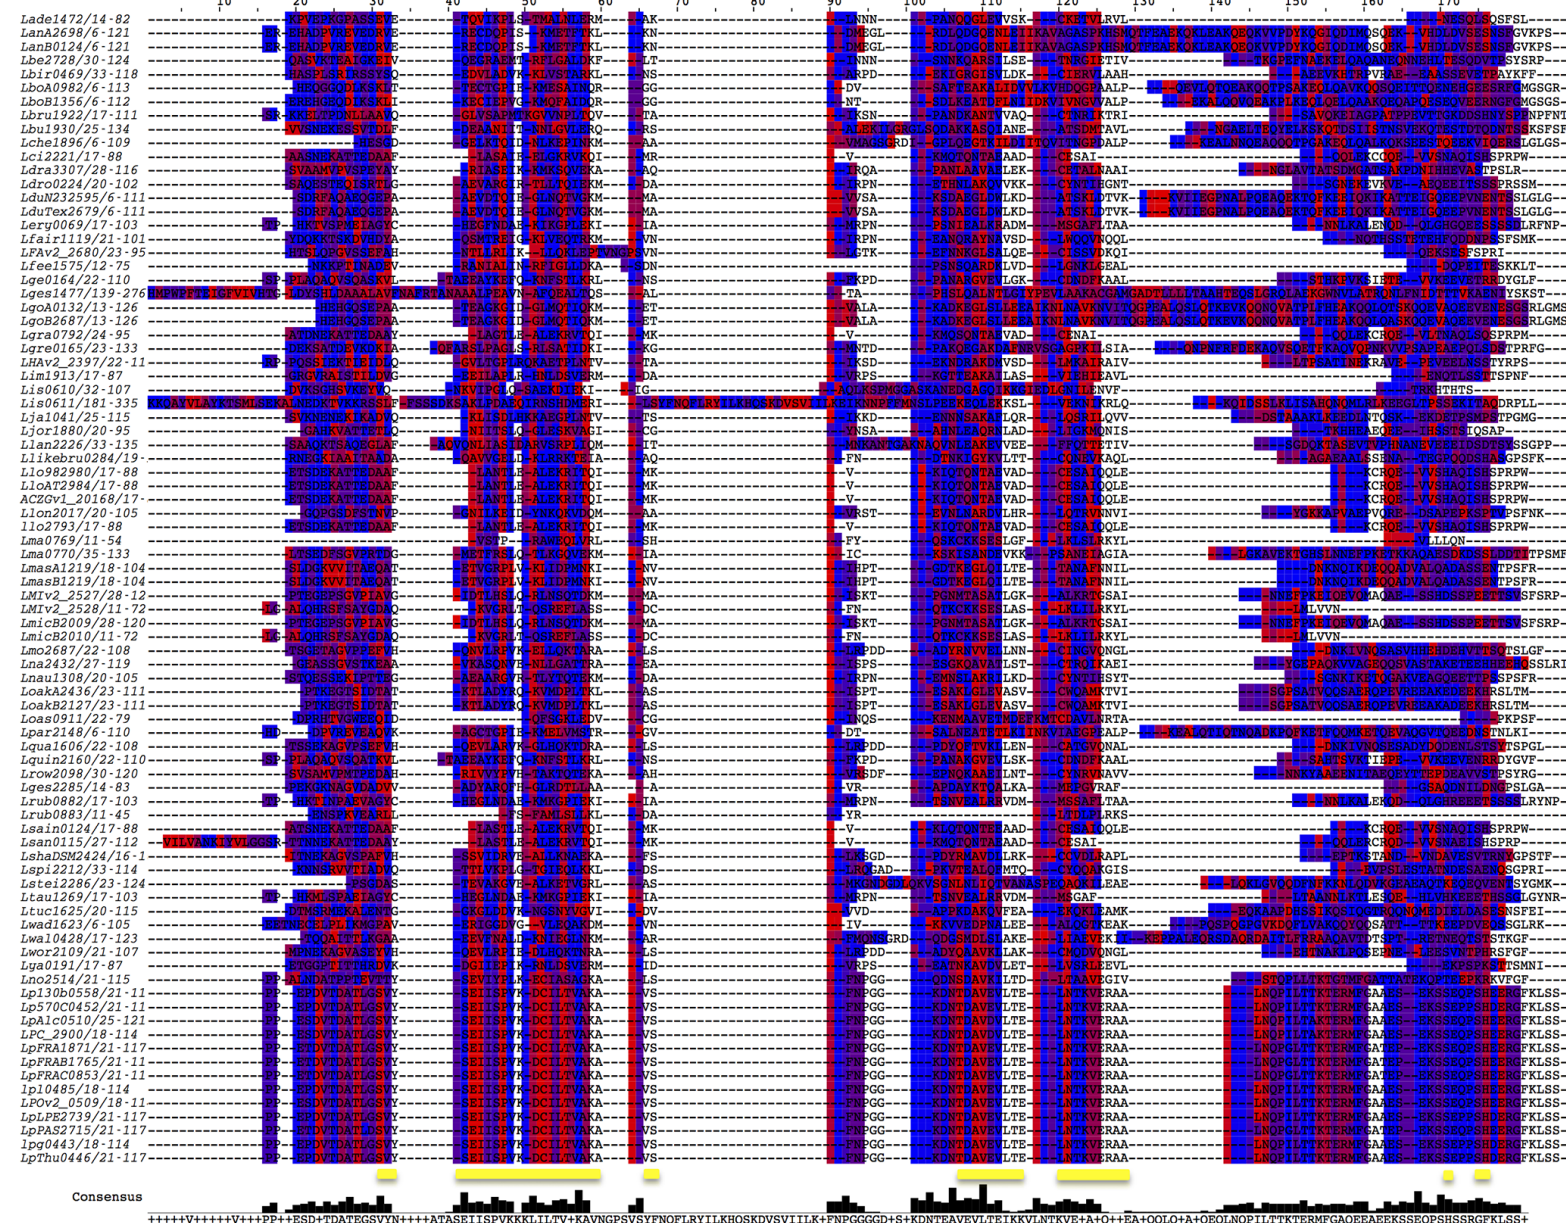



Figure S12

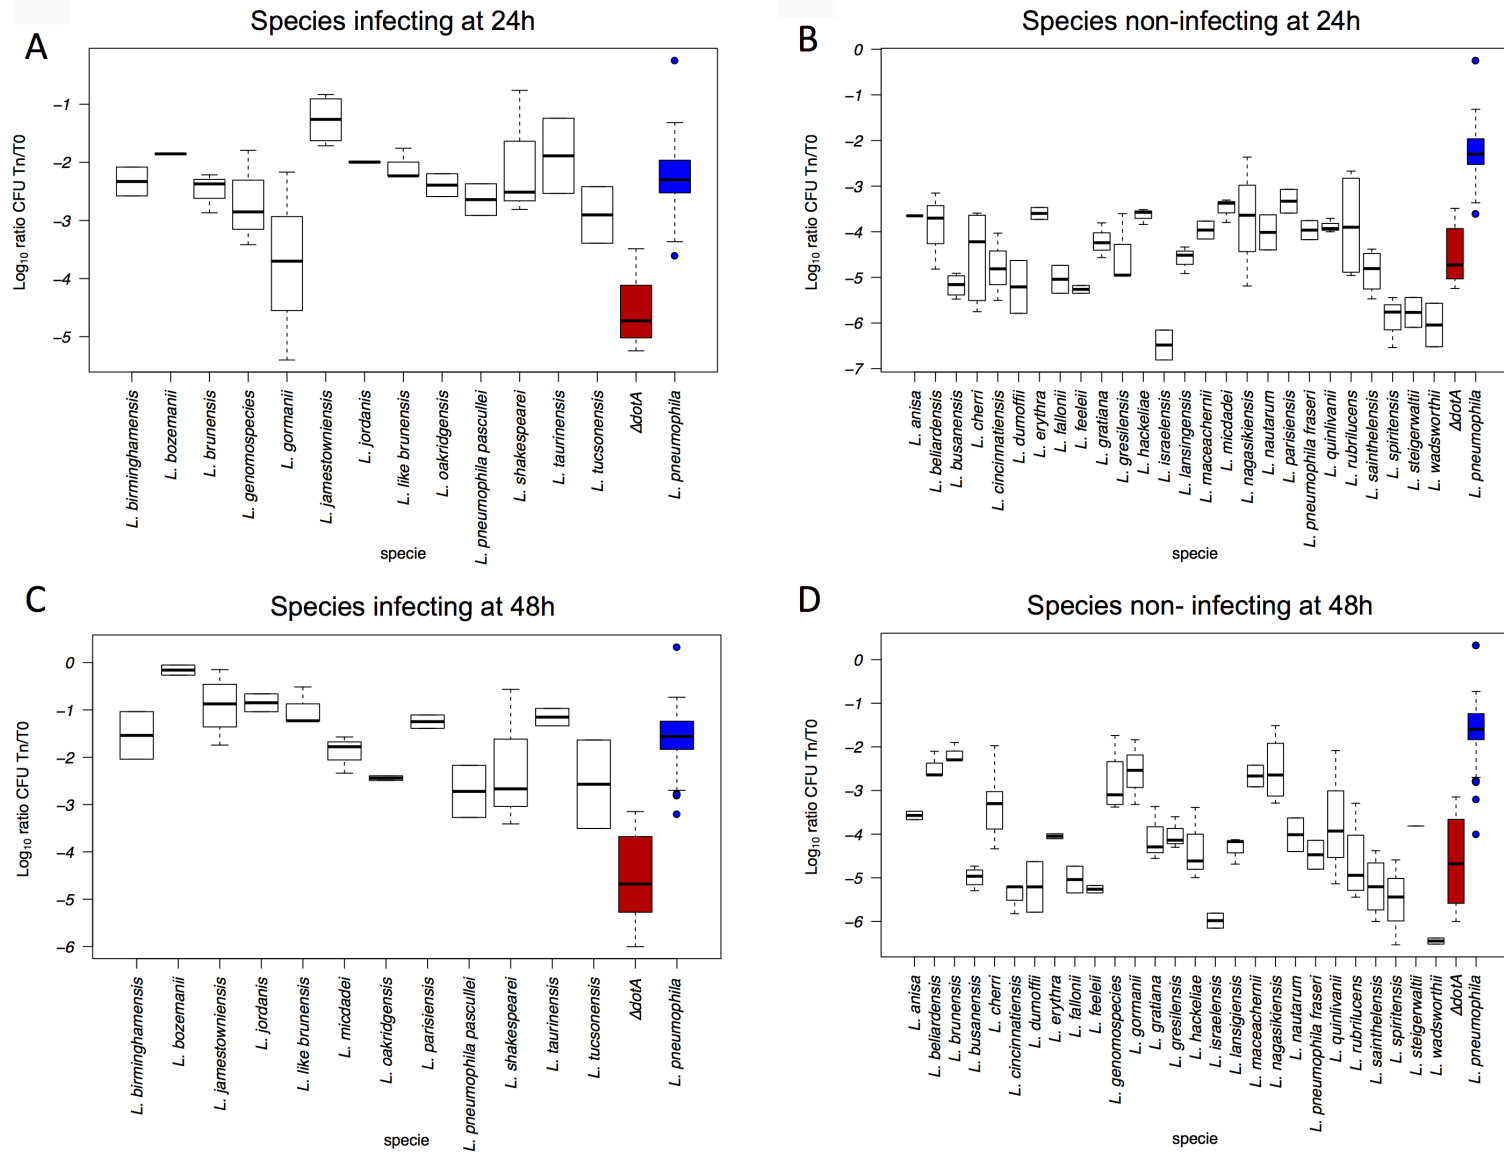

Figure S13

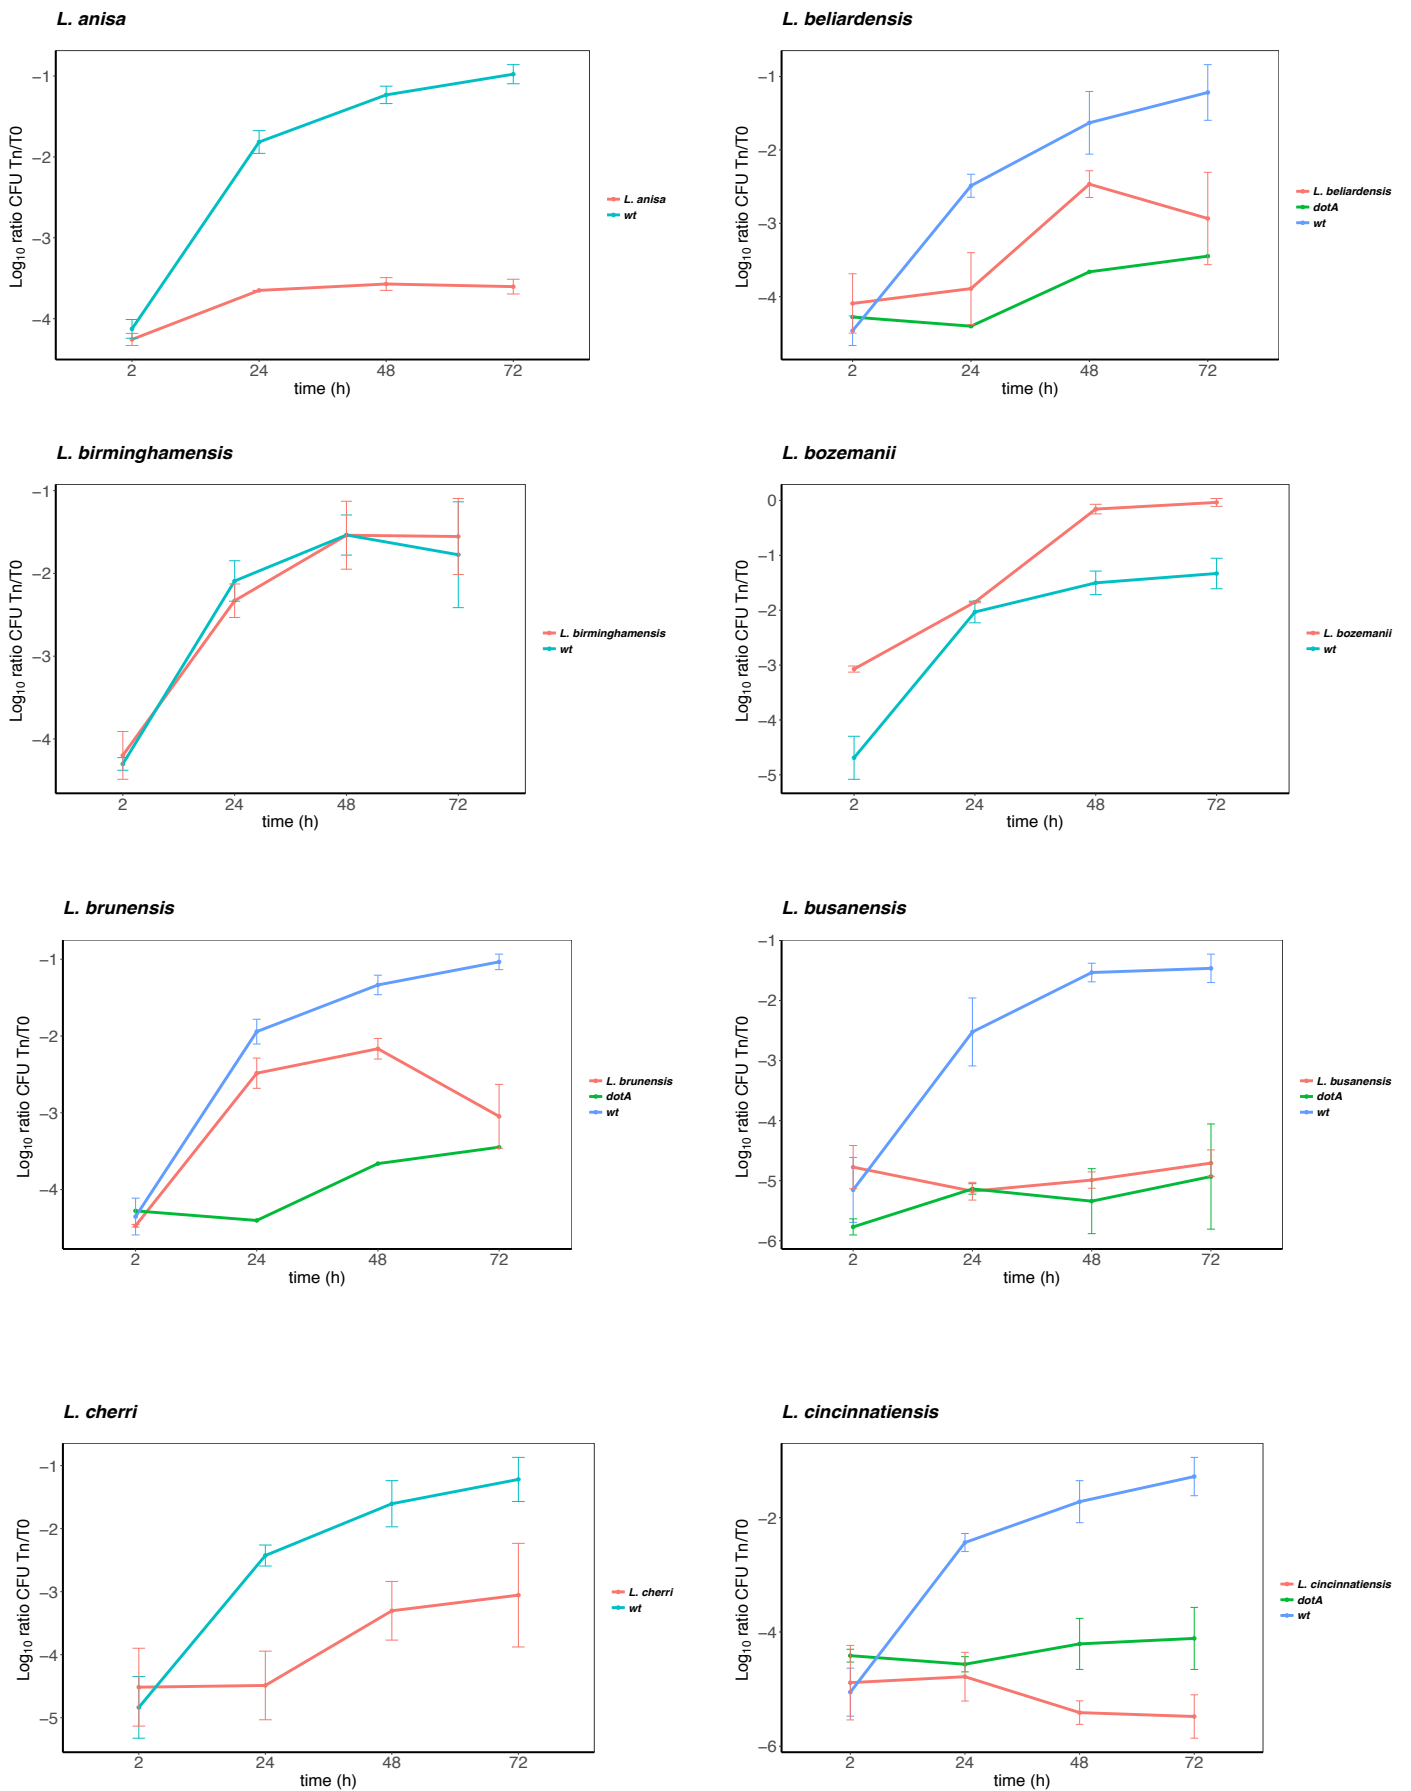

***L. dumoffii***

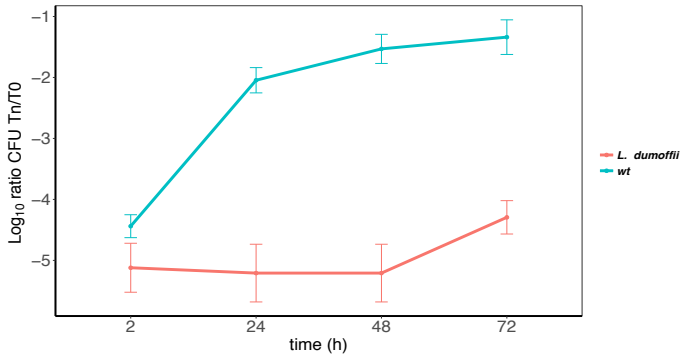

***L. erythra***

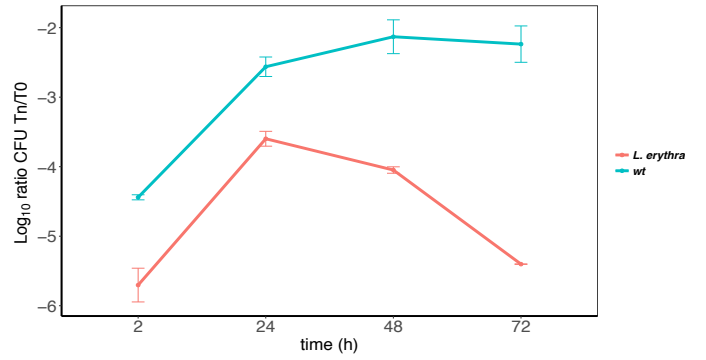

***L. fallonii***

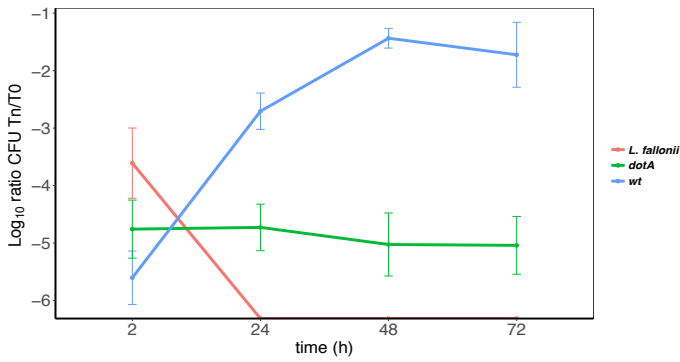

***L. feeleii***

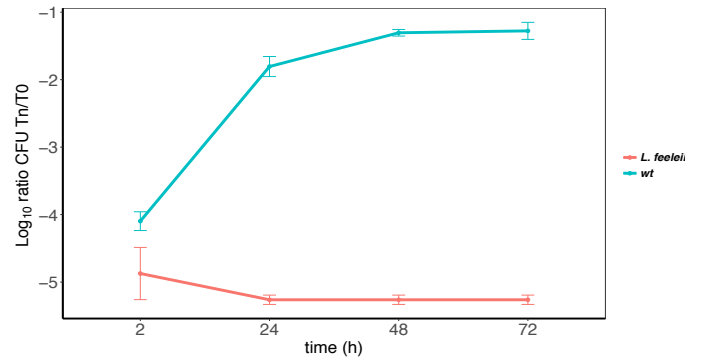

***L. genomospecies***

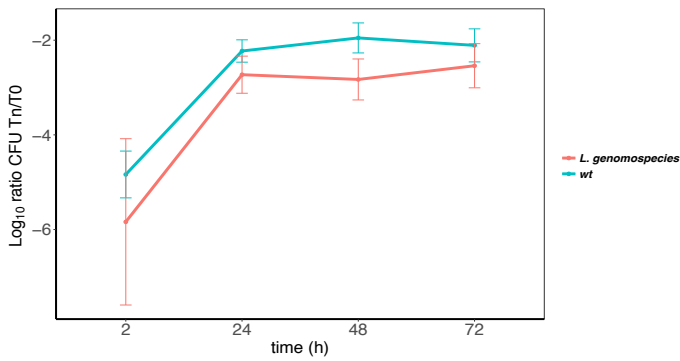

***L. gormanii***

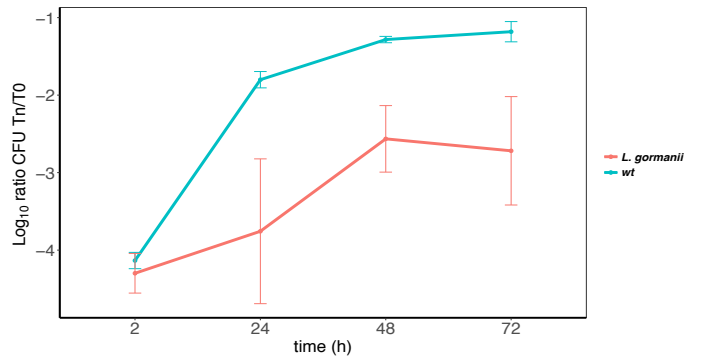

***L. gratiana***

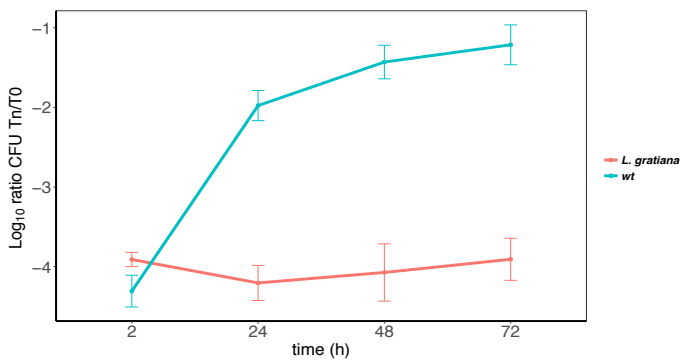

***L. gresilensis***

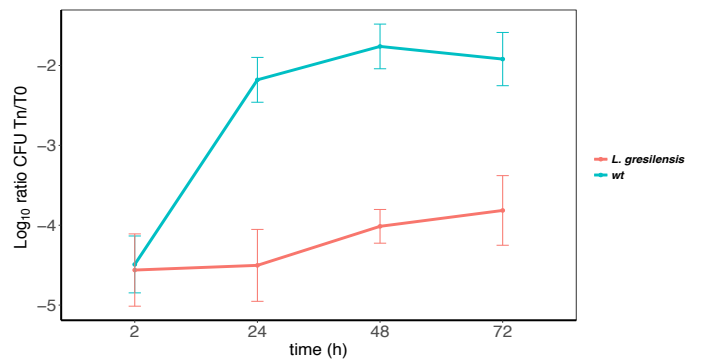

***L. hackeliae***

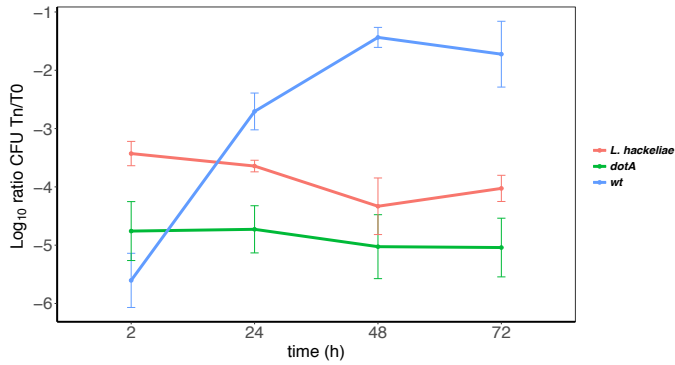

***L. israelensis***

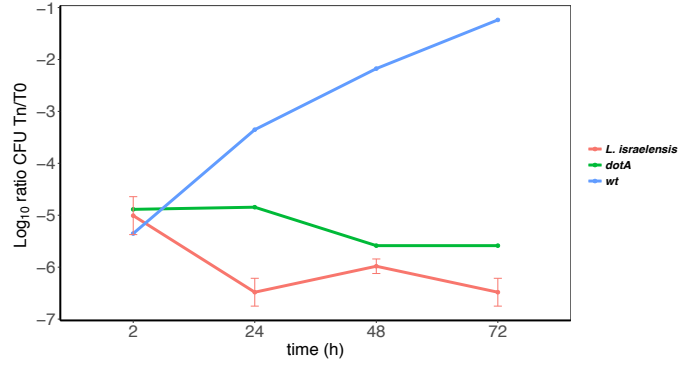

***L. jamestowniensis***

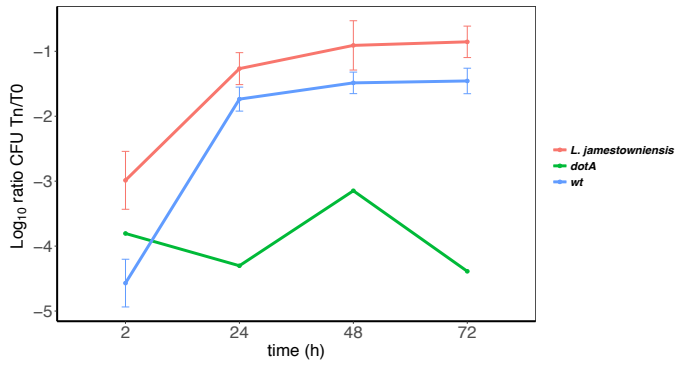

***L. jordani***

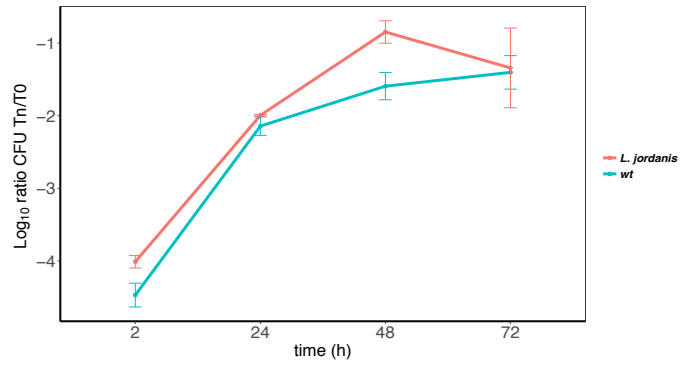

***L. lansingensis***

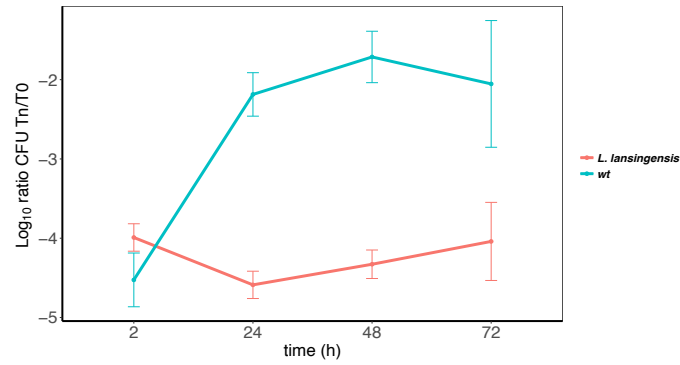

***L. like brunensis***

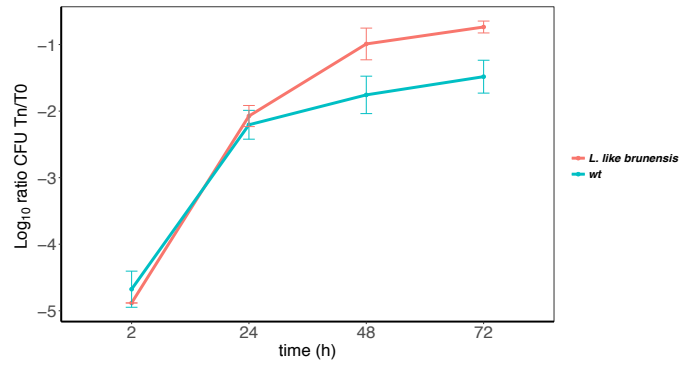

***L. maceachernii***

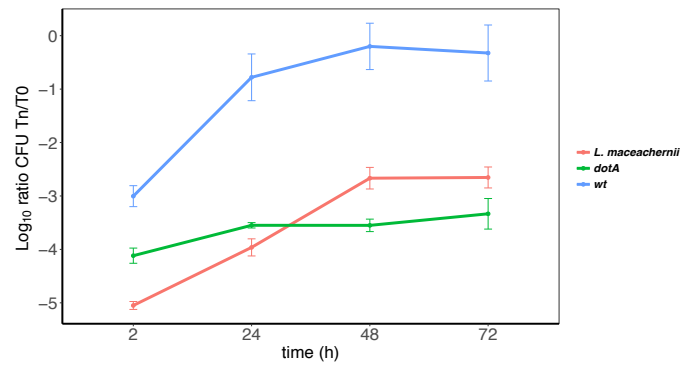

***L. micdadei***

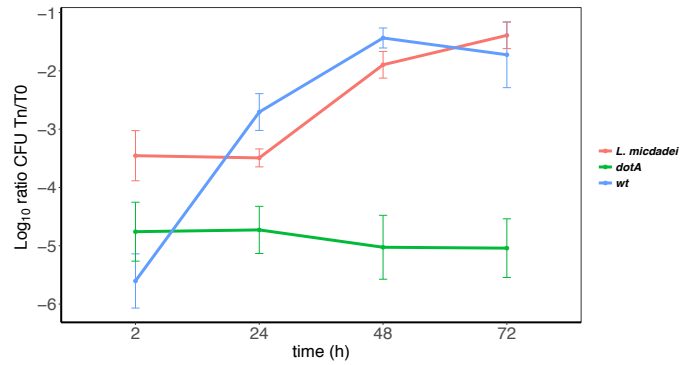

***L. nagasakiensis***

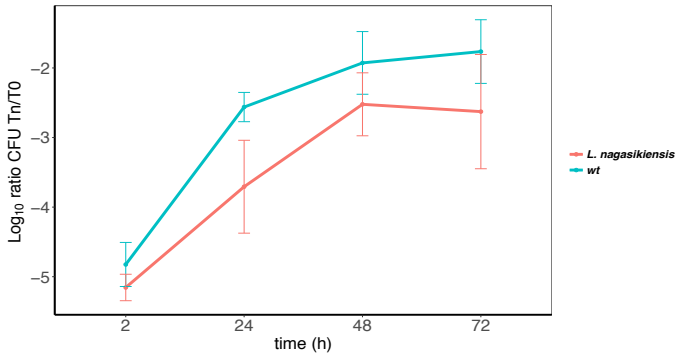

***L. nautarum***

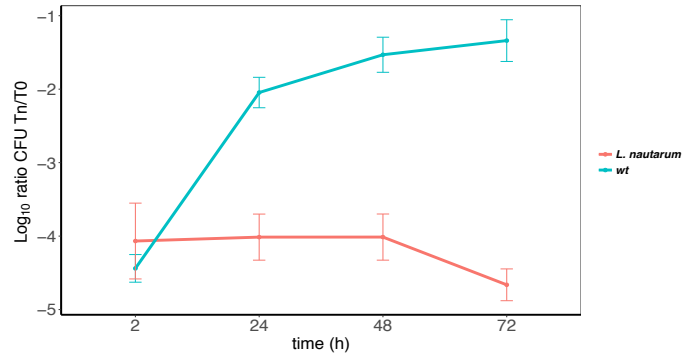

***L. oakridgensis***

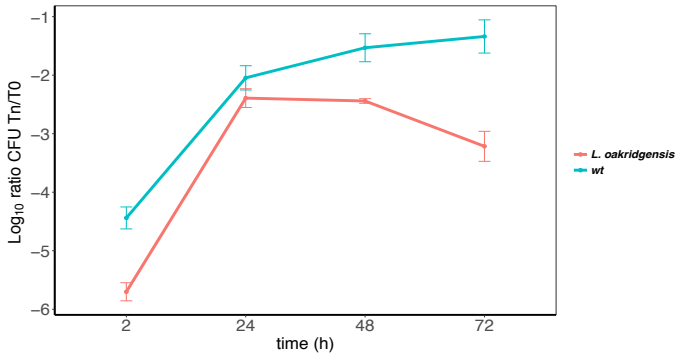

***L. parisiensis***

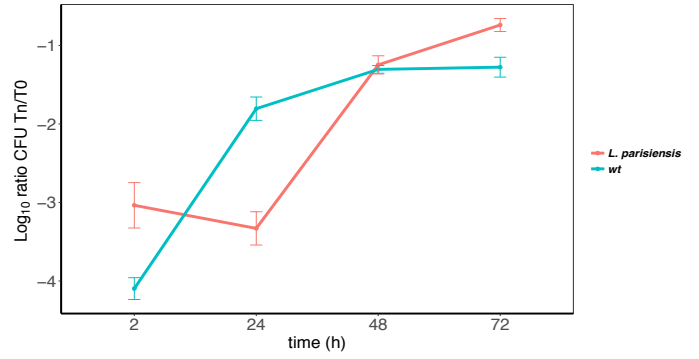

***L. pneumophila fraseri***

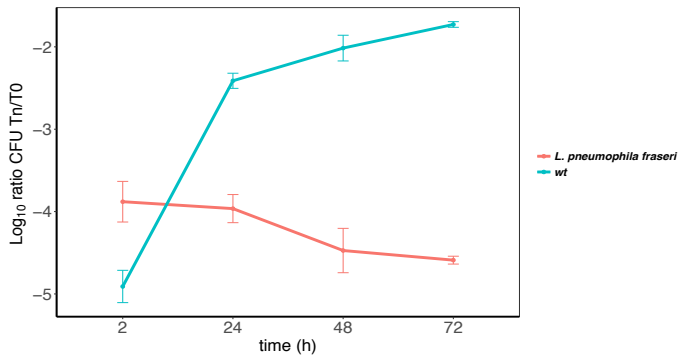

***L. pneumophila pascullei***

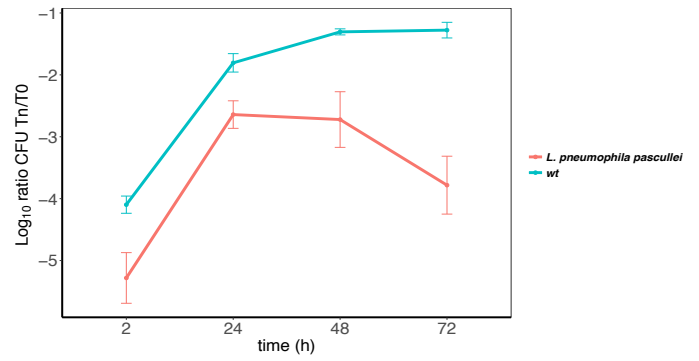

***L. quinlivanii***

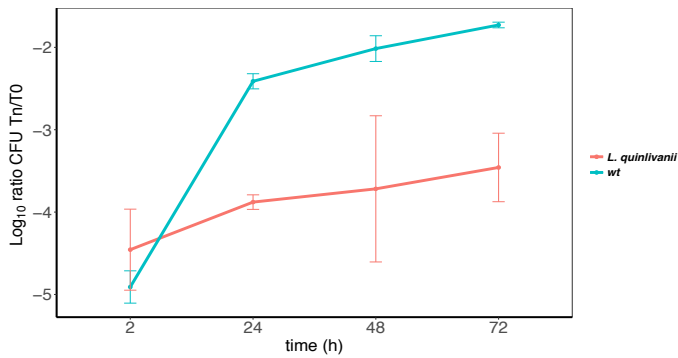

***L. rubrilucens***

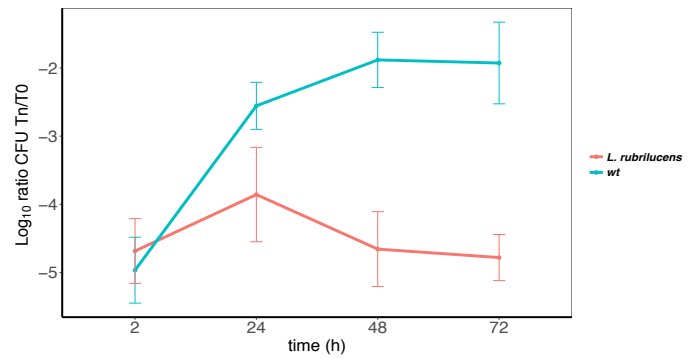

***L. sainthelensis***

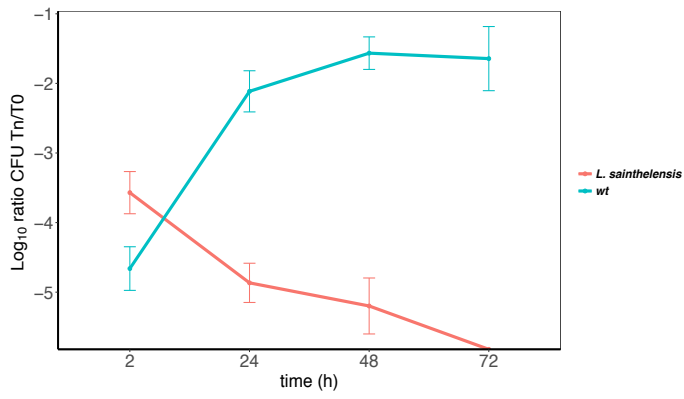

***L. santicrucis***

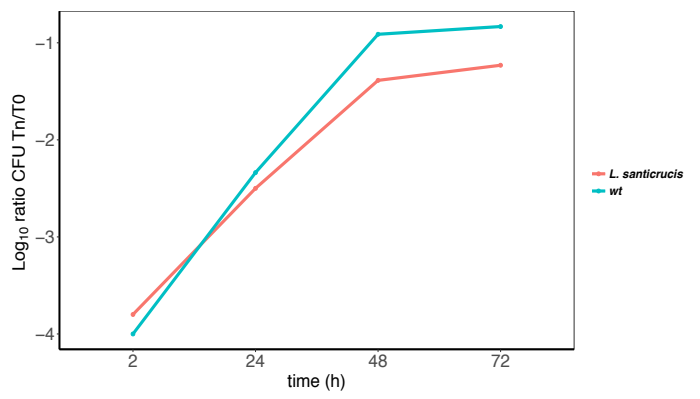

***L. shakespearei***

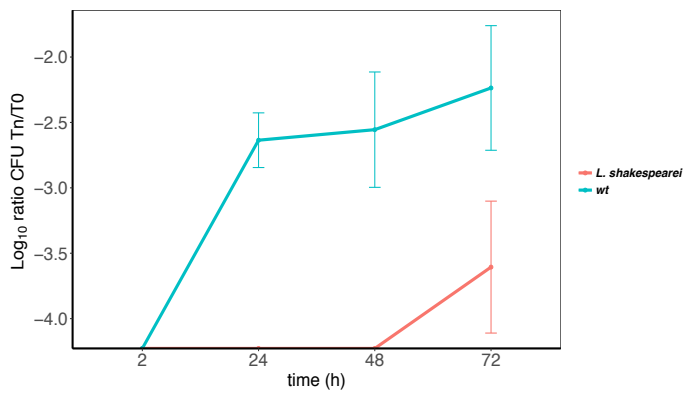

***L. spiritensis***

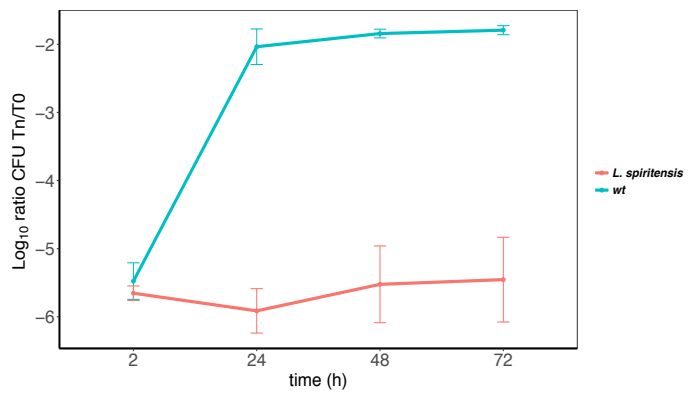

***L. steigerwaltii***

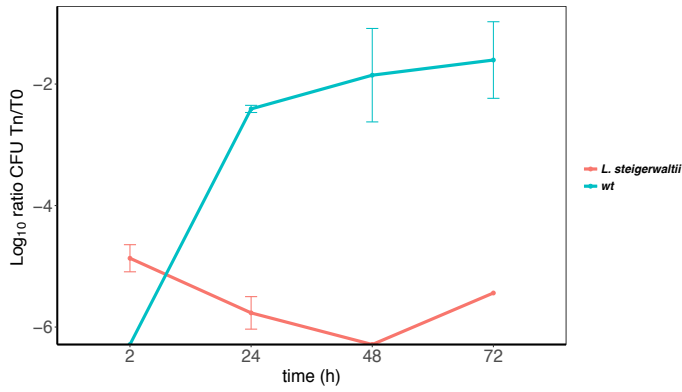

***L. taurinensis***

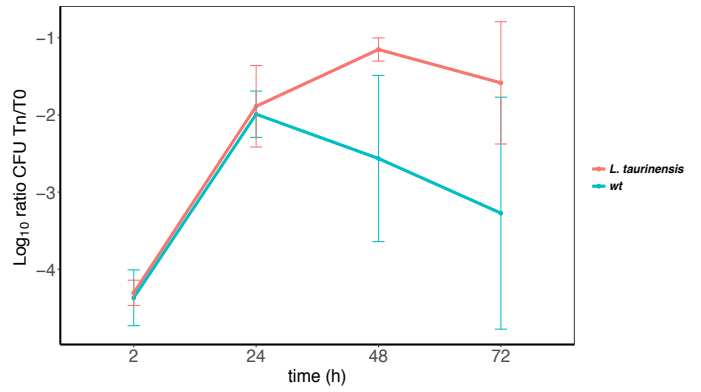

***L. tucsonensis***

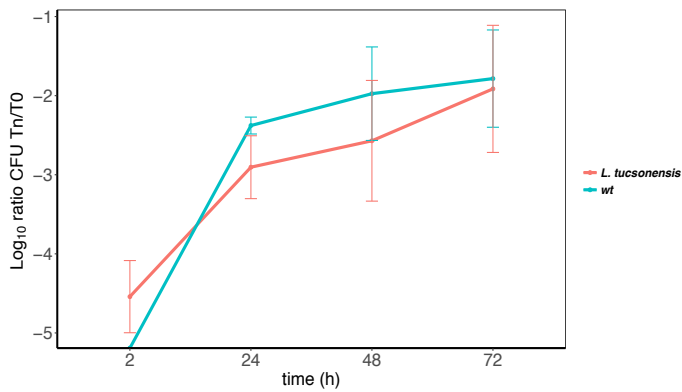

***L. wadsworthii***

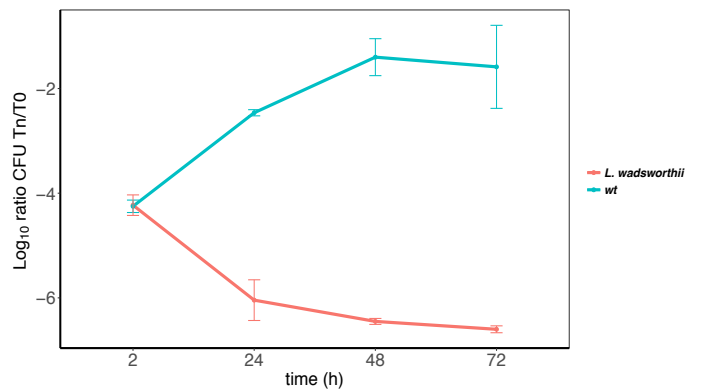

Figure S14

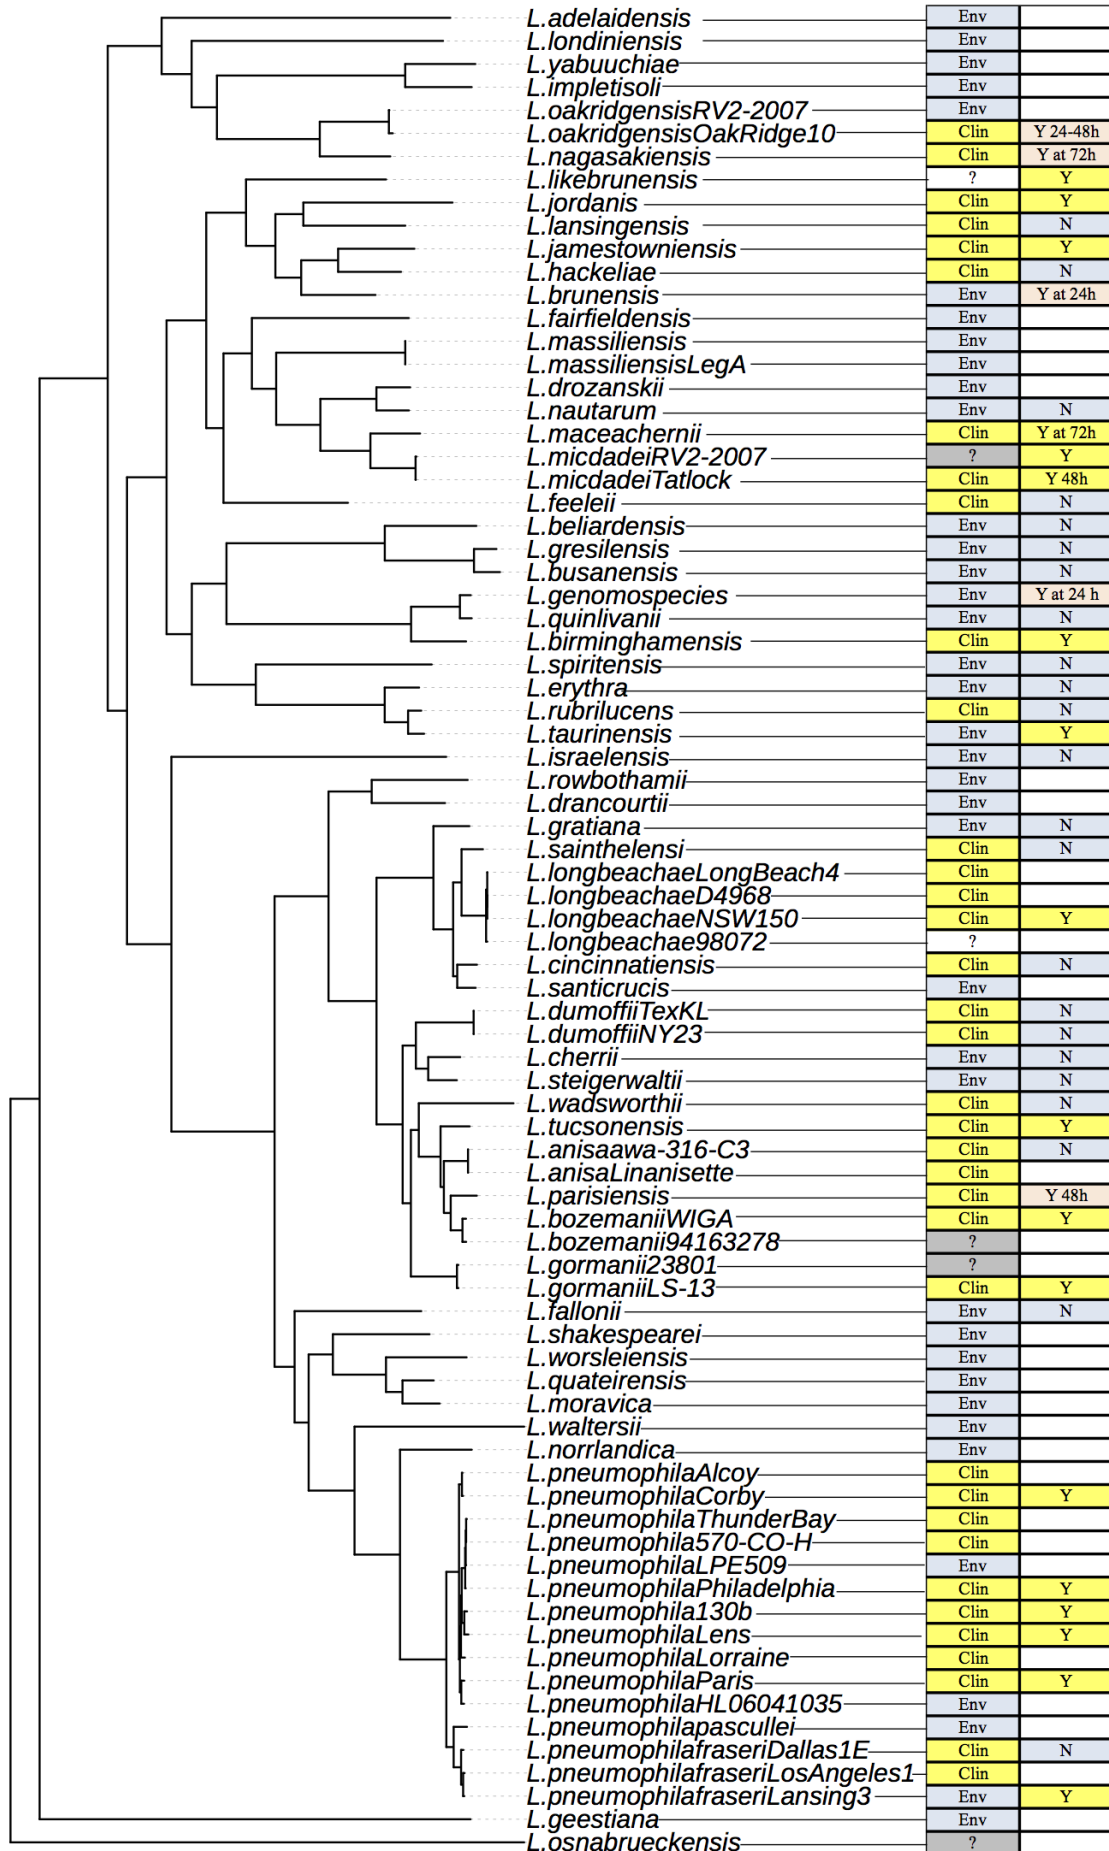

Supplement: pnas.1808016116.sapp.pdf [file pnas.1808016116.sapp.pdf]
